# Supplementary material
Source: publisher figshare collection journal article supplement (https://acs.figshare.com/ndownloader/files/3770005)
Supplement: Supplementary file 1 [file 3770005]

 
data_MnV(O)(TBP8Cz)
 
_audit_creation_method            SHELXL-2013
_chemical_name_systematic
;
 ?
;
_chemical_name_common             ?
_chemical_melting_point           ?
_chemical_formula_moiety          
 'C96 H104 Mn N7 O, 1.94(C2 H3 N)'
_chemical_formula_sum
 'C99.88 H109.81 Mn N8.94 O' 
_chemical_formula_weight          1506.43

loop_
 _atom_type_symbol
 _atom_type_description
 _atom_type_scat_dispersion_real
 _atom_type_scat_dispersion_imag
 _atom_type_scat_source
 'C'  'C'   0.0181   0.0091
 'International Tables Vol C Tables 4.2.6.8 and 6.1.1.4'
 'H'  'H'   0.0000   0.0000
 'International Tables Vol C Tables 4.2.6.8 and 6.1.1.4'
 'N'  'N'   0.0311   0.0180
 'International Tables Vol C Tables 4.2.6.8 and 6.1.1.4'
 'O'  'O'   0.0492   0.0322
 'International Tables Vol C Tables 4.2.6.8 and 6.1.1.4'
 'Mn'  'Mn'  -0.5299   2.8052
 'International Tables Vol C Tables 4.2.6.8 and 6.1.1.4'
 
_space_group_crystal_system       triclinic
_space_group_IT_number            2
_space_group_name_H-M_alt         'P -1'
_space_group_name_Hall            '-P 1'
 
_shelx_space_group_comment
;
The symmetry employed for this shelxl refinement is uniquely defined
by the following loop, which should always be used as a source of
symmetry information in preference to the above space-group names.
They are only intended as comments.
;
 
loop_
 _space_group_symop_operation_xyz
 'x, y, z'
 '-x, -y, -z'
 
_cell_length_a                    13.2613(4)
_cell_length_b                    16.7068(5)
_cell_length_c                    22.4780(8)
_cell_angle_alpha                 75.669(3)
_cell_angle_beta                  75.927(3)
_cell_angle_gamma                 78.815(3)
_cell_volume                      4632.6(3)
_cell_formula_units_Z             2
_cell_measurement_temperature     110(2)
_cell_measurement_reflns_used     11310 
_cell_measurement_theta_min       3.08 
_cell_measurement_theta_max       71.90  
 
_exptl_crystal_description        'thin lath' 
_exptl_crystal_colour             'dark brown-purple'
_exptl_crystal_density_meas       ? 
_exptl_crystal_density_method     ?              
_exptl_crystal_density_diffrn     1.080          
_exptl_crystal_F_000              1609.3
_exptl_transmission_factor_min    ?                                             
_exptl_transmission_factor_max    ?                                             
_exptl_crystal_size_max           0.62 
_exptl_crystal_size_mid           0.06 
_exptl_crystal_size_min           0.02 
_exptl_absorpt_coefficient_mu     1.533
_shelx_estimated_absorpt_T_min    ? 
_shelx_estimated_absorpt_T_max    ? 
_exptl_absorpt_correction_type    analytical 
_exptl_absorpt_correction_T_min   0.674
_exptl_absorpt_correction_T_max   0.972 
_exptl_absorpt_process_details    
;
CrysAlisPro, Agilent Technologies,
Version 1.171.36.32 (release 02-08-2013 CrysAlis171 .NET)
(compiled Aug  2 2013,16:46:58)
Analytical numeric absorption correction using a multifaceted crystal
			model based on expressions derived by R.C. Clark & J.S. Reid.
(Clark, R. C. & Reid, J. S. (1995). Acta Cryst. A51, 887-897)
;
 
_exptl_special_details
;
 ?
;
 
_diffrn_ambient_temperature       110(2)
_diffrn_radiation_wavelength      1.54178
_diffrn_radiation_type            CuK\a
_diffrn_radiation_source          'SuperNova (Cu) X-ray Source' 
_diffrn_radiation_monochromator   'mirror' 
_diffrn_measurement_device_type   'SuperNova, Dual, Cu at zero, Atlas' 
_diffrn_measurement_method        '\w scans' 
_diffrn_reflns_number             55653
_diffrn_reflns_av_unetI/netI      0.0714
_diffrn_reflns_av_R_equivalents   0.0611
_diffrn_reflns_limit_h_min        -15
_diffrn_reflns_limit_h_max        16
_diffrn_reflns_limit_k_min        -20
_diffrn_reflns_limit_k_max        18
_diffrn_reflns_limit_l_min        -27
_diffrn_reflns_limit_l_max        27
_diffrn_reflns_theta_min          3.082
_diffrn_reflns_theta_max          71.899
_diffrn_reflns_theta_full         67.679
_diffrn_measured_fraction_theta_max   0.990
_diffrn_measured_fraction_theta_full  0.993
_diffrn_reflns_Laue_measured_fraction_max    0.990
_diffrn_reflns_Laue_measured_fraction_full   0.993
_diffrn_reflns_point_group_measured_fraction_max   0.990
_diffrn_reflns_point_group_measured_fraction_full  0.993
_reflns_number_total              18021
_reflns_number_gt                 12850
_reflns_threshold_expression      'I > 2\s(I)'
_reflns_Friedel_coverage          0.000
_reflns_Friedel_fraction_max      .
_reflns_Friedel_fraction_full     .
 
_reflns_special_details
;
 Reflections were merged by SHELXL according to the crystal
 class for the calculation of statistics and refinement.
 
 Structure factors included contributions from the .fab file.
 
 _reflns_Friedel_fraction is defined as the number of unique
 Friedel pairs measured divided by the number that would be
 possible theoretically, ignoring centric projections and
 systematic absences.
;
 
_computing_data_collection        
;
CrysAlisPro, Agilent Technologies,
Version 1.171.36.32 (release 02-08-2013 CrysAlis171 .NET)
(compiled Aug  2 2013,16:46:58)
; 
_computing_cell_refinement        
;
CrysAlisPro, Agilent Technologies,
Version 1.171.36.32 (release 02-08-2013 CrysAlis171 .NET)
(compiled Aug  2 2013,16:46:58)
;
_computing_data_reduction         
;
CrysAlisPro, Agilent Technologies,
Version 1.171.36.32 (release 02-08-2013 CrysAlis171 .NET)
(compiled Aug  2 2013,16:46:58)
;
_computing_structure_solution     'SHELXS-2013 (Sheldrick, 2013)'
_computing_structure_refinement   'SHELXL-2013 (Sheldrick, 2013)'
_computing_molecular_graphics     'SHELXTL v6.10 (Sheldrick, 2008)'
_computing_publication_material   'SHELXTL v6.10 (Sheldrick, 2008)'
 
_refine_special_details
;
 ?
;
_refine_ls_structure_factor_coef  Fsqd
_refine_ls_matrix_type            full
_refine_ls_weighting_scheme       calc
_refine_ls_weighting_details
;
 w=1/[\s^2^(Fo^2^)+(0.0655P)^2^+1.4993P]
 where P=(Fo^2^+2Fc^2^)/3
;
_atom_sites_solution_primary      direct
_atom_sites_solution_secondary    difmap
_atom_sites_solution_hydrogens    geom
_refine_ls_hydrogen_treatment     constr
_refine_ls_extinction_method      none
_refine_ls_extinction_coef        .
_refine_ls_number_reflns          18021
_refine_ls_number_parameters      1120
_refine_ls_number_restraints      357
_refine_ls_R_factor_all           0.0878
_refine_ls_R_factor_gt            0.0580
_refine_ls_wR_factor_ref          0.1490
_refine_ls_wR_factor_gt           0.1339
_refine_ls_goodness_of_fit_ref    1.009
_refine_ls_restrained_S_all       1.004
_refine_ls_shift/su_max           0.001
_refine_ls_shift/su_mean          0.000
 
loop_
 _atom_site_label
 _atom_site_type_symbol
 _atom_site_fract_x
 _atom_site_fract_y
 _atom_site_fract_z
 _atom_site_U_iso_or_equiv
 _atom_site_adp_type
 _atom_site_occupancy
 _atom_site_site_symmetry_order  
 _atom_site_calc_flag
 _atom_site_refinement_flags_posn
 _atom_site_refinement_flags_adp
 _atom_site_refinement_flags_occupancy
 _atom_site_disorder_assembly
 _atom_site_disorder_group
Mn1 Mn 0.04680(3) 0.20719(3) 0.00626(2) 0.01620(11) Uani 0.8671(7) 1 d D . P A 1
N1 N 0.04789(15) 0.28604(12) 0.05297(9) 0.0196(4) Uani 0.8671(7) 1 d D . P A 1
N2 N 0.06836(15) 0.30337(12) -0.05637(9) 0.0198(4) Uani 0.8671(7) 1 d D . P A 1
N4 N -0.02763(14) 0.18071(12) -0.04621(9) 0.0176(4) Uani 0.8671(7) 1 d D . P A 1
N6 N -0.05215(15) 0.16115(12) 0.07673(9) 0.0187(4) Uani 0.8671(7) 1 d D . P A 1
O1 O 0.15077(14) 0.14617(12) 0.00338(9) 0.0221(4) Uani 0.8671(7) 1 d D . P A 1
Mn1' Mn -0.0427(2) 0.25839(17) 0.00915(13) 0.01620(11) Uani 0.1329(7) 1 d D . P A 2
N1' N 0.04789(15) 0.28604(12) 0.05297(9) 0.0196(4) Uani 0.1329(7) 1 d D . P A 2
N2' N 0.06836(15) 0.30337(12) -0.05637(9) 0.0198(4) Uani 0.1329(7) 1 d D . P A 2
N4' N -0.02763(14) 0.18071(12) -0.04621(9) 0.0176(4) Uani 0.1329(7) 1 d D . P A 2
N6' N -0.05215(15) 0.16115(12) 0.07673(9) 0.0187(4) Uani 0.1329(7) 1 d D . P A 2
O1' O -0.1488(8) 0.3123(7) 0.0113(6) 0.0221(4) Uani 0.1329(7) 1 d D . P A 2
C1 C 0.03496(18) 0.27507(14) 0.11624(11) 0.0193(5) Uani 1 1 d . . . . .
C2 C 0.08352(17) 0.33758(14) 0.12843(11) 0.0203(5) Uani 1 1 d . . . . .
C3 C 0.12228(17) 0.38731(14) 0.07023(12) 0.0202(5) Uani 1 1 d . . . . .
C4 C 0.10019(18) 0.35375(14) 0.02300(11) 0.0191(5) Uani 1 1 d . . . . .
C5 C 0.11273(18) 0.36430(15) -0.04370(12) 0.0224(5) Uani 1 1 d . . . . .
C6 C 0.15677(18) 0.41346(15) -0.10203(12) 0.0231(5) Uani 1 1 d . . . . .
C7 C 0.13722(18) 0.38228(15) -0.14935(12) 0.0227(5) Uani 1 1 d . . . . .
C8 C 0.08002(18) 0.31308(14) -0.11944(11) 0.0208(5) Uani 1 1 d . . . . .
C9 C -0.01082(17) 0.20597(14) -0.11077(11) 0.0178(5) Uani 1 1 d . . . . .
C10 C -0.06255(17) 0.15644(14) -0.13505(11) 0.0177(5) Uani 1 1 d . . . . .
C11 C -0.11109(17) 0.10185(14) -0.08450(11) 0.0186(5) Uani 1 1 d . . . . .
C12 C -0.08889(17) 0.11728(13) -0.02918(11) 0.0171(5) Uani 1 1 d . . . . .
C13 C -0.10845(17) 0.09876(14) 0.07820(11) 0.0191(5) Uani 1 1 d . . . . .
C14 C -0.15266(18) 0.06274(14) 0.14275(11) 0.0190(5) Uani 1 1 d . . . . .
C15 C -0.12193(18) 0.10425(14) 0.17988(11) 0.0197(5) Uani 1 1 d . . . . .
C16 C -0.05852(18) 0.16513(14) 0.13869(11) 0.0195(5) Uani 1 1 d . . . . .
N3 N 0.04044(15) 0.26750(12) -0.14671(9) 0.0205(4) Uani 1 1 d . . . . .
N5 N -0.12482(15) 0.07736(12) 0.02898(9) 0.0177(4) Uani 1 1 d . . . . .
N7 N -0.01483(15) 0.21633(12) 0.15825(9) 0.0199(4) Uani 1 1 d . . . . .
C17 C -0.07233(18) 0.17444(14) -0.20093(11) 0.0204(5) Uani 1 1 d . . . . .
C18 C 0.01299(19) 0.18994(15) -0.25102(12) 0.0243(5) Uani 1 1 d . . . . .
H18 H 0.0811 0.1854 -0.2428 0.029 Uiso 1 1 calc R U . . .
C19 C -0.0011(2) 0.21176(17) -0.31213(12) 0.0280(6) Uani 1 1 d . . . . .
H19 H 0.0579 0.2216 -0.3454 0.034 Uiso 1 1 calc R U . . .
C20 C -0.0998(2) 0.21976(17) -0.32646(12) 0.0281(6) Uani 1 1 d . . . . .
C21 C -0.1839(2) 0.20333(17) -0.27657(12) 0.0283(6) Uani 1 1 d . . . . .
H21 H -0.2518 0.2075 -0.2848 0.034 Uiso 1 1 calc R U . . .
C22 C -0.17057(19) 0.18107(16) -0.21514(11) 0.0235(5) Uani 1 1 d . . . . .
H22 H -0.2295 0.1701 -0.1821 0.028 Uiso 1 1 calc R U . . .
C23 C -0.1132(2) 0.24665(19) -0.39456(13) 0.0353(6) Uani 1 1 d . . . . .
C24 C -0.0772(3) 0.3329(2) -0.42296(14) 0.0491(8) Uani 1 1 d . . . . .
H24A H -0.1200 0.3736 -0.3989 0.074 Uiso 1 1 calc R U . . .
H24B H -0.0854 0.3506 -0.4667 0.074 Uiso 1 1 calc R U . . .
H24C H -0.0032 0.3294 -0.4214 0.074 Uiso 1 1 calc R U . . .
C25 C -0.0459(3) 0.1825(2) -0.43144(15) 0.0569(10) Uani 1 1 d . . . . .
H25A H 0.0277 0.1783 -0.4289 0.085 Uiso 1 1 calc R U . . .
H25B H -0.0525 0.2001 -0.4754 0.085 Uiso 1 1 calc R U . . .
H25C H -0.0698 0.1280 -0.4136 0.085 Uiso 1 1 calc R U . . .
C26 C -0.2275(3) 0.2530(2) -0.40001(14) 0.0447(8) Uani 1 1 d . . . . .
H26A H -0.2519 0.1987 -0.3817 0.067 Uiso 1 1 calc R U . . .
H26B H -0.2323 0.2694 -0.4443 0.067 Uiso 1 1 calc R U . . .
H26C H -0.2714 0.2949 -0.3775 0.067 Uiso 1 1 calc R U . . .
C27 C -0.17675(18) 0.04023(14) -0.08475(11) 0.0186(5) Uani 1 1 d . . . . .
C28 C -0.14769(18) -0.00763(15) -0.13079(11) 0.0212(5) Uani 1 1 d . . . . .
H28 H -0.0833 -0.0027 -0.1604 0.025 Uiso 1 1 calc R U . . .
C29 C -0.21200(19) -0.06220(15) -0.13367(12) 0.0237(5) Uani 1 1 d . . . . .
H29 H -0.1899 -0.0949 -0.1648 0.028 Uiso 1 1 calc R U . . .
C30 C -0.30853(18) -0.07055(14) -0.09200(12) 0.0212(5) Uani 1 1 d . . . . .
C31 C -0.33522(19) -0.02381(14) -0.04548(12) 0.0220(5) Uani 1 1 d . . . . .
H31 H -0.3995 -0.0290 -0.0158 0.026 Uiso 1 1 calc R U . . .
C32 C -0.27102(18) 0.03005(14) -0.04118(11) 0.0210(5) Uani 1 1 d . . . . .
H32 H -0.2912 0.0602 -0.0084 0.025 Uiso 1 1 calc R U . . .
C33 C -0.37751(19) -0.13139(15) -0.09634(12) 0.0245(5) Uani 1 1 d . . . . .
C34 C -0.3708(2) -0.13359(18) -0.16495(13) 0.0359(7) Uani 1 1 d . . . . .
H34A H -0.4213 -0.1680 -0.1671 0.054 Uiso 1 1 calc R U . . .
H34B H -0.2996 -0.1574 -0.1829 0.054 Uiso 1 1 calc R U . . .
H34C H -0.3871 -0.0767 -0.1887 0.054 Uiso 1 1 calc R U . . .
C35 C -0.4933(2) -0.10740(18) -0.06674(16) 0.0391(7) Uani 1 1 d . . . . .
H35A H -0.5175 -0.0498 -0.0863 0.059 Uiso 1 1 calc R U . . .
H35B H -0.5005 -0.1120 -0.0216 0.059 Uiso 1 1 calc R U . . .
H35C H -0.5357 -0.1451 -0.0734 0.059 Uiso 1 1 calc R U . . .
C36 C -0.3377(2) -0.21821(16) -0.06131(14) 0.0354(7) Uani 1 1 d . . . . .
H36A H -0.3793 -0.2588 -0.0646 0.053 Uiso 1 1 calc R U . . .
H36B H -0.3445 -0.2175 -0.0170 0.053 Uiso 1 1 calc R U . . .
H36C H -0.2637 -0.2339 -0.0799 0.053 Uiso 1 1 calc R U . . .
C37 C -0.22503(18) 0.00035(14) 0.15988(11) 0.0190(5) Uani 1 1 d . . . . .
C38 C -0.20836(19) -0.06392(15) 0.12763(12) 0.0227(5) Uani 1 1 d . . . . .
H38 H -0.1475 -0.0691 0.0955 0.027 Uiso 1 1 calc R U . . .
C39 C -0.27945(19) -0.12058(15) 0.14180(12) 0.0254(5) Uani 1 1 d . . . . .
H39 H -0.2657 -0.1640 0.1193 0.030 Uiso 1 1 calc R U . . .
C40 C -0.37005(19) -0.11518(15) 0.18803(13) 0.0259(5) Uani 1 1 d . . . . .
C41 C -0.3868(2) -0.05003(16) 0.22028(13) 0.0278(6) Uani 1 1 d . . . . .
H41 H -0.4482 -0.0444 0.2521 0.033 Uiso 1 1 calc R U . . .
C42 C -0.31585(19) 0.00603(15) 0.20670(12) 0.0247(5) Uani 1 1 d . . . . .
H42 H -0.3291 0.0491 0.2296 0.030 Uiso 1 1 calc R U . . .
C43 C -0.4525(2) -0.17377(16) 0.20269(15) 0.0332(6) Uani 1 1 d . . . . .
C44 C -0.4139(2) -0.24620(18) 0.16838(17) 0.0451(8) Uani 1 1 d . . . . .
H44A H -0.4044 -0.2243 0.1230 0.068 Uiso 1 1 calc R U . . .
H44B H -0.4659 -0.2849 0.1816 0.068 Uiso 1 1 calc R U . . .
H44C H -0.3468 -0.2756 0.1786 0.068 Uiso 1 1 calc R U . . .
C45 C -0.5524(2) -0.12414(19) 0.18187(19) 0.0515(9) Uani 1 1 d . . . . .
H45A H -0.5360 -0.0997 0.1369 0.077 Uiso 1 1 calc R U . . .
H45B H -0.5799 -0.0795 0.2052 0.077 Uiso 1 1 calc R U . . .
H45C H -0.6051 -0.1614 0.1902 0.077 Uiso 1 1 calc R U . . .
C46 C -0.4785(3) -0.2109(2) 0.27368(16) 0.0507(9) Uani 1 1 d . . . . .
H46A H -0.5303 -0.2491 0.2823 0.076 Uiso 1 1 calc R U . . .
H46B H -0.5074 -0.1657 0.2964 0.076 Uiso 1 1 calc R U . . .
H46C H -0.4144 -0.2415 0.2874 0.076 Uiso 1 1 calc R U . . .
C47 C -0.14690(19) 0.09391(15) 0.24867(11) 0.0218(5) Uani 0.910(4) 1 d D U P B 1
C48 C -0.1442(7) 0.0146(2) 0.28862(17) 0.0274(13) Uani 0.910(4) 1 d D U P B 1
H48 H -0.1249 -0.0339 0.2712 0.033 Uiso 0.910(4) 1 calc R U P B 1
C49 C -0.1694(3) 0.0062(3) 0.35339(16) 0.0310(10) Uani 0.910(4) 1 d D U P B 1
H49 H -0.1667 -0.0481 0.3795 0.037 Uiso 0.910(4) 1 calc R U P B 1
C50 C -0.1987(5) 0.0759(3) 0.38105(17) 0.0324(7) Uani 0.910(4) 1 d D U P B 1
C51 C -0.2016(8) 0.1539(3) 0.34131(19) 0.0308(12) Uani 0.910(4) 1 d D U P B 1
H51 H -0.2201 0.2022 0.3588 0.037 Uiso 0.910(4) 1 calc R U P B 1
C52 C -0.1781(6) 0.1631(2) 0.27660(19) 0.0254(11) Uani 0.910(4) 1 d D U P B 1
H52 H -0.1833 0.2176 0.2508 0.030 Uiso 0.910(4) 1 calc R U P B 1
C53 C -0.2251(3) 0.0634(3) 0.45283(18) 0.0442(9) Uani 0.910(4) 1 d D U P B 1
C54 C -0.3106(4) 0.0070(3) 0.48048(18) 0.0723(15) Uani 0.910(4) 1 d D U P B 1
H54A H -0.2845 -0.0480 0.4703 0.108 Uiso 0.910(4) 1 calc R U P B 1
H54B H -0.3729 0.0318 0.4627 0.108 Uiso 0.910(4) 1 calc R U P B 1
H54C H -0.3290 0.0011 0.5262 0.108 Uiso 0.910(4) 1 calc R U P B 1
C55 C -0.1255(3) 0.0240(3) 0.47851(18) 0.0624(12) Uani 0.910(4) 1 d D U P B 1
H55A H -0.0702 0.0593 0.4590 0.094 Uiso 0.910(4) 1 calc R U P B 1
H55B H -0.1017 -0.0315 0.4688 0.094 Uiso 0.910(4) 1 calc R U P B 1
H55C H -0.1409 0.0190 0.5241 0.094 Uiso 0.910(4) 1 calc R U P B 1
C56 C -0.2649(3) 0.1467(3) 0.47421(17) 0.0548(11) Uani 0.910(4) 1 d D U P B 1
H56A H -0.2836 0.1360 0.5201 0.082 Uiso 0.910(4) 1 calc R U P B 1
H56B H -0.3270 0.1746 0.4570 0.082 Uiso 0.910(4) 1 calc R U P B 1
H56C H -0.2096 0.1825 0.4591 0.082 Uiso 0.910(4) 1 calc R U P B 1
C47' C -0.14690(19) 0.09391(15) 0.24867(11) 0.0218(5) Uani 0.090(4) 1 d D U P B 2
C48' C -0.130(8) 0.0143(15) 0.2867(14) 0.025(3) Uani 0.090(4) 1 d D U P B 2
H48' H -0.1073 -0.0335 0.2686 0.030 Uiso 0.090(4) 1 calc R U P B 2
C49' C -0.146(5) 0.006(2) 0.3514(13) 0.030(3) Uani 0.090(4) 1 d D U P B 2
H49' H -0.1264 -0.0460 0.3769 0.036 Uiso 0.090(4) 1 calc R U P B 2
C50' C -0.192(5) 0.074(3) 0.3792(12) 0.034(3) Uani 0.090(4) 1 d D U P B 2
C51' C -0.211(9) 0.152(3) 0.3401(14) 0.031(3) Uani 0.090(4) 1 d D U P B 2
H51' H -0.2535 0.1971 0.3567 0.037 Uiso 0.090(4) 1 calc R U P B 2
C52' C -0.166(8) 0.1632(17) 0.2763(16) 0.026(3) Uani 0.090(4) 1 d D U P B 2
H52' H -0.1493 0.2161 0.2524 0.031 Uiso 0.090(4) 1 calc R U P B 2
C53' C -0.213(3) 0.066(2) 0.4507(12) 0.045(3) Uani 0.090(4) 1 d D U P B 2
C54' C -0.209(3) -0.0255(19) 0.4849(15) 0.057(6) Uani 0.090(4) 1 d D U P B 2
H54D H -0.2337 -0.0287 0.5300 0.085 Uiso 0.090(4) 1 calc R U P B 2
H54E H -0.1360 -0.0534 0.4769 0.085 Uiso 0.090(4) 1 calc R U P B 2
H54F H -0.2532 -0.0531 0.4697 0.085 Uiso 0.090(4) 1 calc R U P B 2
C55' C -0.133(3) 0.109(3) 0.4664(17) 0.061(6) Uani 0.090(4) 1 d D U P B 2
H55D H -0.1287 0.1634 0.4381 0.092 Uiso 0.090(4) 1 calc R U P B 2
H55E H -0.0644 0.0741 0.4612 0.092 Uiso 0.090(4) 1 calc R U P B 2
H55F H -0.1561 0.1156 0.5099 0.092 Uiso 0.090(4) 1 calc R U P B 2
C56' C -0.325(3) 0.110(3) 0.4722(17) 0.064(6) Uani 0.090(4) 1 d D U P B 2
H56D H -0.3417 0.1013 0.5180 0.095 Uiso 0.090(4) 1 calc R U P B 2
H56E H -0.3756 0.0875 0.4581 0.095 Uiso 0.090(4) 1 calc R U P B 2
H56F H -0.3281 0.1702 0.4541 0.095 Uiso 0.090(4) 1 calc R U P B 2
C57 C 0.10123(19) 0.33694(15) 0.19062(12) 0.0223(5) Uani 1 1 d . . . . .
C58 C 0.19743(19) 0.35070(16) 0.19778(12) 0.0257(5) Uani 1 1 d . . . . .
H58 H 0.2488 0.3680 0.1615 0.031 Uiso 1 1 calc R U . . .
C59 C 0.2199(2) 0.33973(18) 0.25651(13) 0.0323(6) Uani 1 1 d . . . . .
H59 H 0.2867 0.3493 0.2595 0.039 Uiso 1 1 calc R U . . .
C60 C 0.1476(2) 0.3152(2) 0.31129(13) 0.0362(7) Uani 1 1 d . . . . .
C61 C 0.0495(2) 0.30419(19) 0.30391(13) 0.0355(7) Uani 1 1 d . . . . .
H61 H -0.0029 0.2892 0.3402 0.043 Uiso 1 1 calc R U . . .
C62 C 0.0266(2) 0.31448(17) 0.24546(12) 0.0290(6) Uani 1 1 d . . . . .
H62 H -0.0407 0.3062 0.2424 0.035 Uiso 1 1 calc R U . . .
C63 C 0.1721(3) 0.2982(2) 0.37656(14) 0.0493(9) Uani 1 1 d . . . . .
C64 C 0.2830(3) 0.3134(3) 0.37476(16) 0.0671(12) Uani 1 1 d . . . . .
H64A H 0.2952 0.3008 0.4176 0.101 Uiso 1 1 calc R U . . .
H64B H 0.2903 0.3720 0.3554 0.101 Uiso 1 1 calc R U . . .
H64C H 0.3345 0.2772 0.3501 0.101 Uiso 1 1 calc R U . . .
C65 C 0.0947(3) 0.3562(3) 0.41500(17) 0.0680(12) Uani 1 1 d . . . . .
H65A H 0.0229 0.3466 0.4180 0.102 Uiso 1 1 calc R U . . .
H65B H 0.1021 0.4144 0.3944 0.102 Uiso 1 1 calc R U . . .
H65C H 0.1095 0.3448 0.4572 0.102 Uiso 1 1 calc R U . . .
C66 C 0.1609(4) 0.2070(3) 0.40898(18) 0.0736(13) Uani 1 1 d . . . . .
H66A H 0.0897 0.1968 0.4111 0.110 Uiso 1 1 calc R U . . .
H66B H 0.1739 0.1962 0.4515 0.110 Uiso 1 1 calc R U . . .
H66C H 0.2119 0.1698 0.3850 0.110 Uiso 1 1 calc R U . . .
C67 C 0.17777(18) 0.45924(14) 0.06261(11) 0.0205(5) Uani 1 1 d . . . . .
C68 C 0.28009(18) 0.46164(14) 0.02987(11) 0.0211(5) Uani 1 1 d . . . . .
H68 H 0.3125 0.4217 0.0049 0.025 Uiso 1 1 calc R U . . .
C69 C 0.33636(18) 0.52243(14) 0.03317(11) 0.0211(5) Uani 1 1 d . . . . .
H69 H 0.4068 0.5228 0.0105 0.025 Uiso 1 1 calc R U . . .
C70 C 0.29172(18) 0.58251(15) 0.06887(12) 0.0218(5) Uani 1 1 d . . . . .
C71 C 0.18587(19) 0.58277(15) 0.09805(13) 0.0277(6) Uani 1 1 d . . . . .
H71 H 0.1514 0.6255 0.1201 0.033 Uiso 1 1 calc R U . . .
C72 C 0.12999(19) 0.52208(15) 0.09561(13) 0.0261(6) Uani 1 1 d . . . . .
H72 H 0.0585 0.5232 0.1166 0.031 Uiso 1 1 calc R U . . .
C73 C 0.35361(19) 0.64496(15) 0.07869(13) 0.0263(6) Uani 1 1 d . . . . .
C74 C 0.4702(2) 0.62834(18) 0.05082(14) 0.0339(7) Uani 1 1 d . . . . .
H74A H 0.4804 0.6332 0.0055 0.051 Uiso 1 1 calc R U . . .
H74B H 0.4989 0.5719 0.0701 0.051 Uiso 1 1 calc R U . . .
H74C H 0.5065 0.6692 0.0589 0.051 Uiso 1 1 calc R U . . .
C75 C 0.3096(2) 0.73326(17) 0.04945(17) 0.0441(8) Uani 1 1 d . . . . .
H75A H 0.3484 0.7732 0.0565 0.066 Uiso 1 1 calc R U . . .
H75B H 0.2352 0.7450 0.0688 0.066 Uiso 1 1 calc R U . . .
H75C H 0.3171 0.7383 0.0043 0.066 Uiso 1 1 calc R U . . .
C76 C 0.3414(2) 0.6377(2) 0.14974(15) 0.0435(8) Uani 1 1 d . . . . .
H76A H 0.3828 0.6759 0.1567 0.065 Uiso 1 1 calc R U . . .
H76B H 0.3663 0.5803 0.1692 0.065 Uiso 1 1 calc R U . . .
H76C H 0.2672 0.6523 0.1685 0.065 Uiso 1 1 calc R U . . .
C77 C 0.22005(19) 0.48185(15) -0.11390(12) 0.0230(5) Uani 1 1 d . . . . .
C78 C 0.3226(2) 0.47149(16) -0.14875(13) 0.0289(6) Uani 1 1 d . . . . .
H78 H 0.3512 0.4198 -0.1609 0.035 Uiso 1 1 calc R U . . .
C79 C 0.3830(2) 0.53562(17) -0.16584(13) 0.0303(6) Uani 1 1 d . . . . .
H79 H 0.4528 0.5269 -0.1892 0.036 Uiso 1 1 calc R U . . .
C80 C 0.3436(2) 0.61274(15) -0.14954(12) 0.0253(5) Uani 1 1 d . . . . .
C81 C 0.2425(2) 0.62203(16) -0.11406(13) 0.0283(6) Uani 1 1 d . . . . .
H81 H 0.2144 0.6735 -0.1015 0.034 Uiso 1 1 calc R U . . .
C82 C 0.18104(19) 0.55817(15) -0.09640(13) 0.0266(6) Uani 1 1 d . . . . .
H82 H 0.1119 0.5666 -0.0722 0.032 Uiso 1 1 calc R U . . .
C83 C 0.4152(2) 0.68076(16) -0.17017(14) 0.0300(6) Uani 1 1 d . . . . .
C84 C 0.4492(3) 0.7008(2) -0.24199(15) 0.0466(8) Uani 1 1 d . . . . .
H84A H 0.3869 0.7211 -0.2606 0.070 Uiso 1 1 calc R U . . .
H84B H 0.4868 0.6503 -0.2564 0.070 Uiso 1 1 calc R U . . .
H84C H 0.4955 0.7439 -0.2548 0.070 Uiso 1 1 calc R U . . .
C85 C 0.3604(2) 0.76050(17) -0.14861(17) 0.0429(8) Uani 1 1 d . . . . .
H85A H 0.2968 0.7809 -0.1658 0.064 Uiso 1 1 calc R U . . .
H85B H 0.4077 0.8029 -0.1634 0.064 Uiso 1 1 calc R U . . .
H85C H 0.3414 0.7491 -0.1027 0.064 Uiso 1 1 calc R U . . .
C86 C 0.5132(2) 0.64843(18) -0.14188(16) 0.0388(7) Uani 1 1 d . . . . .
H86A H 0.5591 0.6917 -0.1542 0.058 Uiso 1 1 calc R U . . .
H86B H 0.5509 0.5986 -0.1573 0.058 Uiso 1 1 calc R U . . .
H86C H 0.4923 0.6343 -0.0960 0.058 Uiso 1 1 calc R U . . .
C87 C 0.16622(19) 0.40981(16) -0.21830(12) 0.0252(5) Uani 1 1 d . . . . .
C88 C 0.1933(2) 0.35238(17) -0.25703(12) 0.0281(6) Uani 1 1 d . . . . .
H88 H 0.1937 0.2946 -0.2387 0.034 Uiso 1 1 calc R U . . .
C89 C 0.2198(2) 0.37744(18) -0.32177(13) 0.0331(6) Uani 1 1 d . . . . .
H89 H 0.2379 0.3365 -0.3468 0.040 Uiso 1 1 calc R U . . .
C90 C 0.2203(2) 0.46210(19) -0.35107(13) 0.0362(7) Uani 1 1 d . . . . .
C91 C 0.1930(2) 0.51915(19) -0.31243(14) 0.0377(7) Uani 1 1 d . . . . .
H91 H 0.1924 0.5769 -0.3309 0.045 Uiso 1 1 calc R U . . .
C92 C 0.1664(2) 0.49456(17) -0.24741(13) 0.0315(6) Uani 1 1 d . . . . .
H92 H 0.1481 0.5355 -0.2224 0.038 Uiso 1 1 calc R U . . .
C93 C 0.2489(3) 0.4863(2) -0.42275(15) 0.0493(8) Uani 1 1 d . . . . .
C94 C 0.1674(3) 0.4607(3) -0.45019(16) 0.0635(11) Uani 1 1 d . . . . .
H94A H 0.1867 0.4742 -0.4961 0.095 Uiso 1 1 calc R U . . .
H94B H 0.0979 0.4910 -0.4363 0.095 Uiso 1 1 calc R U . . .
H94C H 0.1657 0.4005 -0.4357 0.095 Uiso 1 1 calc R U . . .
C95 C 0.2511(3) 0.5800(2) -0.44644(17) 0.0636(11) Uani 1 1 d . . . . .
H95A H 0.2726 0.5924 -0.4923 0.095 Uiso 1 1 calc R U . . .
H95B H 0.3011 0.5975 -0.4282 0.095 Uiso 1 1 calc R U . . .
H95C H 0.1809 0.6102 -0.4340 0.095 Uiso 1 1 calc R U . . .
C96 C 0.3581(3) 0.4401(3) -0.44706(16) 0.0648(11) Uani 1 1 d . . . . .
H96A H 0.3581 0.3798 -0.4324 0.097 Uiso 1 1 calc R U . . .
H96B H 0.4113 0.4574 -0.4312 0.097 Uiso 1 1 calc R U . . .
H96C H 0.3742 0.4538 -0.4930 0.097 Uiso 1 1 calc R U . . .
C1S C 0.1134(4) 0.0457(4) 0.3075(2) 0.104(2) Uani 0.974(5) 1 d . . P . .
H1S1 H 0.0992 0.0148 0.2794 0.156 Uiso 0.974(5) 1 calc R U P . .
H1S2 H 0.1113 0.1049 0.2871 0.156 Uiso 0.974(5) 1 calc R U P . .
H1S3 H 0.0601 0.0396 0.3465 0.156 Uiso 0.974(5) 1 calc R U P . .
C2S C 0.2147(5) 0.0135(4) 0.3215(2) 0.0862(18) Uani 0.974(5) 1 d . . P . .
N1S N 0.2966(4) -0.0151(3) 0.3332(2) 0.1023(17) Uani 0.974(5) 1 d . . P . .
C3S C -0.0747(3) 0.4345(3) -0.27197(18) 0.0581(11) Uani 0.964(5) 1 d . . P . .
H3S1 H -0.0732 0.4762 -0.2484 0.087 Uiso 0.964(5) 1 calc R U P . .
H3S2 H -0.0190 0.4398 -0.3098 0.087 Uiso 0.964(5) 1 calc R U P . .
H3S3 H -0.0635 0.3785 -0.2458 0.087 Uiso 0.964(5) 1 calc R U P . .
C4S C -0.1745(3) 0.4477(3) -0.28934(18) 0.0545(10) Uani 0.964(5) 1 d . . P . .
N2S N -0.2539(3) 0.4582(3) -0.30359(18) 0.0787(13) Uani 0.964(5) 1 d . . P . .
 
loop_
 _atom_site_aniso_label
 _atom_site_aniso_U_11
 _atom_site_aniso_U_22
 _atom_site_aniso_U_33
 _atom_site_aniso_U_23
 _atom_site_aniso_U_13
 _atom_site_aniso_U_12
Mn1 0.0146(2) 0.0171(2) 0.0201(2) -0.00755(16) -0.00353(16) -0.00495(15)
N1 0.0196(10) 0.0213(10) 0.0228(11) -0.0069(8) -0.0050(8) -0.0109(8)
N2 0.0230(10) 0.0176(10) 0.0239(11) -0.0067(8) -0.0073(8) -0.0084(8)
N4 0.0181(10) 0.0197(10) 0.0186(10) -0.0071(8) -0.0039(8) -0.0072(8)
N6 0.0194(10) 0.0199(10) 0.0210(10) -0.0085(8) -0.0035(8) -0.0084(8)
O1 0.0196(9) 0.0242(10) 0.0257(10) -0.0095(8) -0.0056(8) -0.0038(8)
Mn1' 0.0146(2) 0.0171(2) 0.0201(2) -0.00755(16) -0.00353(16) -0.00495(15)
N1' 0.0196(10) 0.0213(10) 0.0228(11) -0.0069(8) -0.0050(8) -0.0109(8)
N2' 0.0230(10) 0.0176(10) 0.0239(11) -0.0067(8) -0.0073(8) -0.0084(8)
N4' 0.0181(10) 0.0197(10) 0.0186(10) -0.0071(8) -0.0039(8) -0.0072(8)
N6' 0.0194(10) 0.0199(10) 0.0210(10) -0.0085(8) -0.0035(8) -0.0084(8)
O1' 0.0196(9) 0.0242(10) 0.0257(10) -0.0095(8) -0.0056(8) -0.0038(8)
C1 0.0156(11) 0.0217(12) 0.0247(13) -0.0107(10) -0.0041(9) -0.0046(9)
C2 0.0149(11) 0.0216(12) 0.0283(13) -0.0130(10) -0.0035(9) -0.0033(9)
C3 0.0125(11) 0.0201(12) 0.0304(14) -0.0104(10) -0.0032(9) -0.0030(9)
C4 0.0163(11) 0.0201(11) 0.0242(13) -0.0083(9) -0.0041(9) -0.0057(9)
C5 0.0179(11) 0.0194(12) 0.0328(14) -0.0088(10) -0.0048(10) -0.0061(9)
C6 0.0167(11) 0.0224(12) 0.0322(14) -0.0084(10) -0.0065(10) -0.0027(9)
C7 0.0164(11) 0.0227(12) 0.0291(14) -0.0034(10) -0.0041(10) -0.0059(9)
C8 0.0203(12) 0.0197(12) 0.0238(13) -0.0055(9) -0.0058(10) -0.0035(9)
C9 0.0159(11) 0.0182(11) 0.0205(12) -0.0052(9) -0.0031(9) -0.0045(9)
C10 0.0144(11) 0.0194(11) 0.0224(12) -0.0094(9) -0.0034(9) -0.0035(9)
C11 0.0138(11) 0.0200(11) 0.0237(12) -0.0083(9) -0.0028(9) -0.0031(9)
C12 0.0143(10) 0.0140(10) 0.0256(13) -0.0073(9) -0.0057(9) -0.0022(8)
C13 0.0162(11) 0.0175(11) 0.0267(13) -0.0088(9) -0.0037(9) -0.0054(9)
C14 0.0170(11) 0.0181(11) 0.0226(12) -0.0071(9) -0.0019(9) -0.0034(9)
C15 0.0166(11) 0.0192(11) 0.0257(13) -0.0092(9) -0.0031(9) -0.0039(9)
C16 0.0187(11) 0.0193(11) 0.0227(13) -0.0087(9) -0.0036(9) -0.0032(9)
N3 0.0183(10) 0.0203(10) 0.0255(11) -0.0061(8) -0.0050(8) -0.0066(8)
N5 0.0180(9) 0.0175(9) 0.0198(10) -0.0058(8) -0.0039(8) -0.0054(7)
N7 0.0184(10) 0.0225(10) 0.0226(11) -0.0102(8) -0.0034(8) -0.0060(8)
C17 0.0224(12) 0.0214(12) 0.0203(12) -0.0080(9) -0.0037(10) -0.0062(9)
C18 0.0219(12) 0.0275(13) 0.0266(14) -0.0104(10) -0.0027(10) -0.0081(10)
C19 0.0272(13) 0.0362(14) 0.0216(13) -0.0092(11) 0.0019(10) -0.0119(11)
C20 0.0334(14) 0.0328(14) 0.0225(13) -0.0087(11) -0.0070(11) -0.0097(11)
C21 0.0255(13) 0.0388(15) 0.0246(14) -0.0096(11) -0.0078(11) -0.0065(11)
C22 0.0187(12) 0.0317(13) 0.0213(13) -0.0079(10) -0.0011(10) -0.0071(10)
C23 0.0404(16) 0.0481(17) 0.0203(14) -0.0075(12) -0.0082(12) -0.0106(13)
C24 0.057(2) 0.063(2) 0.0279(16) 0.0048(15) -0.0119(15) -0.0230(17)
C25 0.067(2) 0.079(3) 0.0298(18) -0.0255(17) -0.0122(16) -0.003(2)
C26 0.053(2) 0.058(2) 0.0289(16) -0.0038(14) -0.0188(14) -0.0159(16)
C27 0.0179(11) 0.0192(11) 0.0224(12) -0.0075(9) -0.0056(9) -0.0057(9)
C28 0.0177(11) 0.0243(12) 0.0232(13) -0.0092(10) -0.0002(10) -0.0065(9)
C29 0.0239(12) 0.0237(12) 0.0289(14) -0.0147(10) -0.0045(10) -0.0055(10)
C30 0.0167(11) 0.0204(12) 0.0305(14) -0.0101(10) -0.0049(10) -0.0062(9)
C31 0.0189(12) 0.0199(12) 0.0287(14) -0.0082(10) -0.0010(10) -0.0073(9)
C32 0.0199(12) 0.0203(12) 0.0254(13) -0.0103(10) -0.0038(10) -0.0033(9)
C33 0.0193(12) 0.0208(12) 0.0385(15) -0.0137(11) -0.0044(11) -0.0078(10)
C34 0.0375(16) 0.0386(16) 0.0417(17) -0.0159(13) -0.0079(13) -0.0198(13)
C35 0.0216(14) 0.0377(16) 0.067(2) -0.0271(15) -0.0016(13) -0.0133(12)
C36 0.0349(15) 0.0233(13) 0.0517(19) -0.0083(12) -0.0111(13) -0.0094(12)
C37 0.0180(11) 0.0186(11) 0.0227(12) -0.0055(9) -0.0056(9) -0.0044(9)
C38 0.0224(12) 0.0219(12) 0.0258(13) -0.0076(10) -0.0047(10) -0.0051(10)
C39 0.0260(13) 0.0174(12) 0.0368(15) -0.0081(10) -0.0091(11) -0.0065(10)
C40 0.0205(12) 0.0233(12) 0.0373(15) -0.0050(11) -0.0093(11) -0.0084(10)
C41 0.0214(12) 0.0276(13) 0.0337(15) -0.0099(11) 0.0033(11) -0.0087(10)
C42 0.0246(13) 0.0231(12) 0.0282(14) -0.0097(10) -0.0001(10) -0.0086(10)
C43 0.0209(13) 0.0240(13) 0.0573(19) -0.0068(12) -0.0098(13) -0.0093(11)
C44 0.0351(16) 0.0296(15) 0.079(2) -0.0170(15) -0.0142(16) -0.0144(13)
C45 0.0251(15) 0.0332(16) 0.101(3) -0.0081(17) -0.0227(17) -0.0104(13)
C46 0.0434(19) 0.0377(17) 0.066(2) -0.0009(16) 0.0010(17) -0.0233(15)
C47 0.0205(11) 0.0267(12) 0.0205(12) -0.0083(9) -0.0004(9) -0.0093(9)
C48 0.030(3) 0.0280(14) 0.0273(15) -0.0093(12) -0.0064(14) -0.0074(12)
C49 0.032(3) 0.0379(16) 0.0226(15) -0.0027(12) -0.0039(13) -0.0107(15)
C50 0.0297(17) 0.0485(17) 0.0236(15) -0.0131(13) -0.0025(12) -0.0128(13)
C51 0.028(3) 0.0406(16) 0.0302(16) -0.0198(13) -0.0015(13) -0.0103(14)
C52 0.021(3) 0.0309(14) 0.0271(15) -0.0110(12) -0.0012(12) -0.0088(12)
C53 0.046(2) 0.065(2) 0.0254(16) -0.0154(15) -0.0027(15) -0.0143(17)
C54 0.087(3) 0.105(4) 0.031(2) -0.023(2) 0.019(2) -0.056(3)
C55 0.071(3) 0.087(3) 0.034(2) -0.022(2) -0.0221(19) 0.003(2)
C56 0.058(2) 0.079(3) 0.0302(19) -0.0290(19) -0.0017(17) -0.003(2)
C47' 0.0205(11) 0.0267(12) 0.0205(12) -0.0083(9) -0.0004(9) -0.0093(9)
C48' 0.025(5) 0.030(5) 0.022(5) -0.007(5) -0.004(5) -0.009(5)
C49' 0.030(5) 0.038(5) 0.025(5) -0.007(5) -0.005(5) -0.009(5)
C50' 0.034(4) 0.048(4) 0.025(4) -0.013(4) -0.003(4) -0.012(4)
C51' 0.027(5) 0.041(5) 0.027(5) -0.014(5) -0.001(5) -0.010(5)
C52' 0.024(5) 0.033(5) 0.025(5) -0.012(5) -0.001(5) -0.009(5)
C53' 0.048(5) 0.064(5) 0.026(5) -0.016(5) -0.002(5) -0.015(5)
C54' 0.067(10) 0.078(10) 0.025(9) -0.017(9) 0.000(9) -0.011(9)
C55' 0.067(10) 0.084(10) 0.029(9) -0.012(9) -0.004(9) -0.009(10)
C56' 0.069(10) 0.085(10) 0.035(9) -0.014(9) 0.004(9) -0.022(10)
C57 0.0220(12) 0.0248(12) 0.0257(13) -0.0148(10) -0.0031(10) -0.0070(10)
C58 0.0213(12) 0.0326(14) 0.0274(14) -0.0131(11) -0.0023(10) -0.0086(10)
C59 0.0253(14) 0.0465(17) 0.0333(15) -0.0182(13) -0.0055(11) -0.0121(12)
C60 0.0340(15) 0.0526(18) 0.0293(15) -0.0166(13) -0.0054(12) -0.0147(13)
C61 0.0334(15) 0.0521(18) 0.0263(15) -0.0166(13) 0.0025(12) -0.0189(13)
C62 0.0236(13) 0.0387(15) 0.0317(15) -0.0175(12) -0.0018(11) -0.0128(11)
C63 0.051(2) 0.079(2) 0.0275(16) -0.0110(16) -0.0093(14) -0.0302(18)
C64 0.060(2) 0.121(4) 0.0333(19) -0.012(2) -0.0183(17) -0.038(2)
C65 0.060(2) 0.122(4) 0.039(2) -0.039(2) 0.0019(17) -0.038(2)
C66 0.087(3) 0.091(3) 0.047(2) 0.008(2) -0.030(2) -0.033(3)
C67 0.0181(11) 0.0191(11) 0.0277(13) -0.0096(10) -0.0039(10) -0.0058(9)
C68 0.0197(12) 0.0191(11) 0.0276(13) -0.0118(10) -0.0036(10) -0.0027(9)
C69 0.0163(11) 0.0218(12) 0.0273(13) -0.0092(10) -0.0016(10) -0.0064(9)
C70 0.0180(11) 0.0202(12) 0.0309(14) -0.0106(10) -0.0045(10) -0.0051(9)
C71 0.0213(12) 0.0215(12) 0.0431(16) -0.0191(11) 0.0012(11) -0.0034(10)
C72 0.0157(12) 0.0247(13) 0.0395(16) -0.0150(11) 0.0013(10) -0.0052(10)
C73 0.0222(13) 0.0231(13) 0.0389(15) -0.0178(11) 0.0006(11) -0.0099(10)
C74 0.0223(13) 0.0358(15) 0.0519(18) -0.0251(13) -0.0001(12) -0.0130(11)
C75 0.0363(16) 0.0226(14) 0.077(2) -0.0153(14) -0.0089(16) -0.0093(12)
C76 0.0358(16) 0.059(2) 0.0489(19) -0.0354(16) -0.0006(14) -0.0172(15)
C77 0.0225(12) 0.0205(12) 0.0292(14) -0.0061(10) -0.0058(10) -0.0087(10)
C78 0.0244(13) 0.0242(13) 0.0419(16) -0.0137(11) -0.0035(11) -0.0082(10)
C79 0.0211(13) 0.0306(14) 0.0416(16) -0.0134(12) 0.0000(11) -0.0101(11)
C80 0.0236(13) 0.0227(12) 0.0338(15) -0.0059(10) -0.0094(11) -0.0085(10)
C81 0.0239(13) 0.0202(12) 0.0447(17) -0.0101(11) -0.0086(12) -0.0062(10)
C82 0.0189(12) 0.0240(13) 0.0389(16) -0.0105(11) -0.0042(11) -0.0048(10)
C83 0.0250(13) 0.0238(13) 0.0443(17) -0.0052(11) -0.0087(12) -0.0112(11)
C84 0.0451(18) 0.0434(18) 0.050(2) 0.0046(15) -0.0088(15) -0.0225(15)
C85 0.0304(15) 0.0237(14) 0.078(2) -0.0114(14) -0.0120(15) -0.0111(12)
C86 0.0263(14) 0.0333(15) 0.063(2) -0.0096(14) -0.0177(14) -0.0099(12)
C87 0.0194(12) 0.0257(13) 0.0312(14) -0.0021(10) -0.0054(10) -0.0096(10)
C88 0.0237(13) 0.0312(14) 0.0305(14) -0.0031(11) -0.0061(11) -0.0106(11)
C89 0.0287(14) 0.0425(16) 0.0278(15) -0.0054(12) -0.0029(11) -0.0110(12)
C90 0.0355(15) 0.0452(17) 0.0288(15) -0.0018(13) -0.0058(12) -0.0169(13)
C91 0.0409(17) 0.0361(16) 0.0349(16) 0.0066(12) -0.0111(13) -0.0166(13)
C92 0.0322(14) 0.0274(14) 0.0358(16) -0.0038(11) -0.0064(12) -0.0102(11)
C93 0.054(2) 0.063(2) 0.0306(17) 0.0024(15) -0.0070(15) -0.0272(18)
C94 0.085(3) 0.081(3) 0.0326(19) 0.0005(18) -0.0187(19) -0.038(2)
C95 0.071(3) 0.077(3) 0.041(2) 0.0168(18) -0.0188(18) -0.037(2)
C96 0.062(2) 0.095(3) 0.0335(19) -0.0061(19) 0.0046(17) -0.030(2)
C1S 0.076(4) 0.166(6) 0.064(3) -0.029(3) 0.011(3) -0.029(4)
C2S 0.082(4) 0.129(5) 0.058(3) -0.034(3) 0.008(3) -0.050(4)
N1S 0.111(4) 0.118(4) 0.085(3) -0.035(3) -0.003(3) -0.039(3)
C3S 0.043(2) 0.076(3) 0.052(2) -0.010(2) -0.0060(17) -0.0093(19)
C4S 0.045(2) 0.068(3) 0.050(2) -0.0116(19) -0.0050(17) -0.0155(18)
N2S 0.058(2) 0.098(3) 0.081(3) -0.005(2) -0.020(2) -0.022(2)
 
_geom_special_details
;
 All esds (except the esd in the dihedral angle between two l.s. planes)
 are estimated using the full covariance matrix.  The cell esds are taken
 into account individually in the estimation of esds in distances, angles
 and torsion angles; correlations between esds in cell parameters are only
 used when they are defined by crystal symmetry.  An approximate (isotropic)
 treatment of cell esds is used for estimating esds involving l.s. planes.
;
 
loop_
 _geom_bond_atom_site_label_1
 _geom_bond_atom_site_label_2
 _geom_bond_distance
 _geom_bond_site_symmetry_2
 _geom_bond_publ_flag
Mn1 O1 1.5455(18) . ?
Mn1 N2 1.873(2) . ?
Mn1 N1 1.8808(19) . ?
Mn1 N4 1.8855(18) . ?
Mn1 N6 1.8974(19) . ?
N1 C1 1.360(3) . ?
N1 C4 1.384(3) . ?
N2 C8 1.360(3) . ?
N2 C5 1.386(3) . ?
N4 C9 1.382(3) . ?
N4 C12 1.382(3) . ?
N6 C13 1.385(3) . ?
N6 C16 1.392(3) . ?
Mn1' O1' 1.514(10) . ?
C1 N7 1.334(3) . ?
C1 C2 1.438(3) . ?
C2 C3 1.402(3) . ?
C2 C57 1.470(3) . ?
C3 C4 1.427(3) . ?
C3 C67 1.482(3) . ?
C4 C5 1.437(3) . ?
C5 C6 1.420(3) . ?
C6 C7 1.390(3) . ?
C6 C77 1.481(3) . ?
C7 C8 1.439(3) . ?
C7 C87 1.479(4) . ?
C8 N3 1.332(3) . ?
C9 N3 1.328(3) . ?
C9 C10 1.442(3) . ?
C10 C11 1.377(3) . ?
C10 C17 1.469(3) . ?
C11 C12 1.437(3) . ?
C11 C27 1.474(3) . ?
C12 N5 1.330(3) . ?
C13 N5 1.320(3) . ?
C13 C14 1.450(3) . ?
C14 C15 1.380(3) . ?
C14 C37 1.472(3) . ?
C15 C16 1.444(3) . ?
C15 C47 1.473(3) . ?
C16 N7 1.328(3) . ?
C17 C22 1.393(3) . ?
C17 C18 1.402(3) . ?
C18 C19 1.381(4) . ?
C18 H18 0.9500 . ?
C19 C20 1.396(4) . ?
C19 H19 0.9500 . ?
C20 C21 1.391(4) . ?
C20 C23 1.529(4) . ?
C21 C22 1.384(3) . ?
C21 H21 0.9500 . ?
C22 H22 0.9500 . ?
C23 C25 1.530(4) . ?
C23 C26 1.531(4) . ?
C23 C24 1.542(4) . ?
C24 H24A 0.9800 . ?
C24 H24B 0.9800 . ?
C24 H24C 0.9800 . ?
C25 H25A 0.9800 . ?
C25 H25B 0.9800 . ?
C25 H25C 0.9800 . ?
C26 H26A 0.9800 . ?
C26 H26B 0.9800 . ?
C26 H26C 0.9800 . ?
C27 C28 1.398(3) . ?
C27 C32 1.398(3) . ?
C28 C29 1.386(3) . ?
C28 H28 0.9500 . ?
C29 C30 1.399(3) . ?
C29 H29 0.9500 . ?
C30 C31 1.395(3) . ?
C30 C33 1.527(3) . ?
C31 C32 1.387(3) . ?
C31 H31 0.9500 . ?
C32 H32 0.9500 . ?
C33 C36 1.531(4) . ?
C33 C34 1.532(4) . ?
C33 C35 1.535(3) . ?
C34 H34A 0.9800 . ?
C34 H34B 0.9800 . ?
C34 H34C 0.9800 . ?
C35 H35A 0.9800 . ?
C35 H35B 0.9800 . ?
C35 H35C 0.9800 . ?
C36 H36A 0.9800 . ?
C36 H36B 0.9800 . ?
C36 H36C 0.9800 . ?
C37 C38 1.394(3) . ?
C37 C42 1.398(3) . ?
C38 C39 1.392(3) . ?
C38 H38 0.9500 . ?
C39 C40 1.389(4) . ?
C39 H39 0.9500 . ?
C40 C41 1.406(3) . ?
C40 C43 1.530(3) . ?
C41 C42 1.385(3) . ?
C41 H41 0.9500 . ?
C42 H42 0.9500 . ?
C43 C45 1.531(4) . ?
C43 C44 1.533(4) . ?
C43 C46 1.541(4) . ?
C44 H44A 0.9800 . ?
C44 H44B 0.9800 . ?
C44 H44C 0.9800 . ?
C45 H45A 0.9800 . ?
C45 H45B 0.9800 . ?
C45 H45C 0.9800 . ?
C46 H46A 0.9800 . ?
C46 H46B 0.9800 . ?
C46 H46C 0.9800 . ?
C47 C52 1.396(4) . ?
C47 C48 1.404(4) . ?
C48 C49 1.390(4) . ?
C48 H48 0.9500 . ?
C49 C50 1.399(4) . ?
C49 H49 0.9500 . ?
C50 C51 1.385(5) . ?
C50 C53 1.535(4) . ?
C51 C52 1.387(4) . ?
C51 H51 0.9500 . ?
C52 H52 0.9500 . ?
C53 C54 1.530(6) . ?
C53 C55 1.536(6) . ?
C53 C56 1.538(5) . ?
C54 H54A 0.9800 . ?
C54 H54B 0.9800 . ?
C54 H54C 0.9800 . ?
C55 H55A 0.9800 . ?
C55 H55B 0.9800 . ?
C55 H55C 0.9800 . ?
C56 H56A 0.9800 . ?
C56 H56B 0.9800 . ?
C56 H56C 0.9800 . ?
C48' C49' 1.393(18) . ?
C48' H48' 0.9500 . ?
C49' C50' 1.395(17) . ?
C49' H49' 0.9500 . ?
C50' C51' 1.391(18) . ?
C50' C53' 1.536(16) . ?
C51' C52' 1.391(19) . ?
C51' H51' 0.9500 . ?
C52' H52' 0.9500 . ?
C53' C54' 1.525(19) . ?
C53' C55' 1.537(19) . ?
C53' C56' 1.541(19) . ?
C54' H54D 0.9800 . ?
C54' H54E 0.9800 . ?
C54' H54F 0.9800 . ?
C55' H55D 0.9800 . ?
C55' H55E 0.9800 . ?
C55' H55F 0.9800 . ?
C56' H56D 0.9800 . ?
C56' H56E 0.9800 . ?
C56' H56F 0.9800 . ?
C57 C58 1.392(3) . ?
C57 C62 1.400(3) . ?
C58 C59 1.384(4) . ?
C58 H58 0.9500 . ?
C59 C60 1.391(4) . ?
C59 H59 0.9500 . ?
C60 C61 1.401(4) . ?
C60 C63 1.526(4) . ?
C61 C62 1.382(4) . ?
C61 H61 0.9500 . ?
C62 H62 0.9500 . ?
C63 C65 1.529(5) . ?
C63 C64 1.529(5) . ?
C63 C66 1.537(5) . ?
C64 H64A 0.9800 . ?
C64 H64B 0.9800 . ?
C64 H64C 0.9800 . ?
C65 H65A 0.9800 . ?
C65 H65B 0.9800 . ?
C65 H65C 0.9800 . ?
C66 H66A 0.9800 . ?
C66 H66B 0.9800 . ?
C66 H66C 0.9800 . ?
C67 C68 1.380(3) . ?
C67 C72 1.397(3) . ?
C68 C69 1.397(3) . ?
C68 H68 0.9500 . ?
C69 C70 1.393(3) . ?
C69 H69 0.9500 . ?
C70 C71 1.397(3) . ?
C70 C73 1.531(3) . ?
C71 C72 1.385(3) . ?
C71 H71 0.9500 . ?
C72 H72 0.9500 . ?
C73 C74 1.519(3) . ?
C73 C75 1.523(4) . ?
C73 C76 1.542(4) . ?
C74 H74A 0.9800 . ?
C74 H74B 0.9800 . ?
C74 H74C 0.9800 . ?
C75 H75A 0.9800 . ?
C75 H75B 0.9800 . ?
C75 H75C 0.9800 . ?
C76 H76A 0.9800 . ?
C76 H76B 0.9800 . ?
C76 H76C 0.9800 . ?
C77 C82 1.393(3) . ?
C77 C78 1.396(3) . ?
C78 C79 1.384(3) . ?
C78 H78 0.9500 . ?
C79 C80 1.395(4) . ?
C79 H79 0.9500 . ?
C80 C81 1.385(4) . ?
C80 C83 1.534(3) . ?
C81 C82 1.389(3) . ?
C81 H81 0.9500 . ?
C82 H82 0.9500 . ?
C83 C85 1.520(4) . ?
C83 C86 1.531(4) . ?
C83 C84 1.536(4) . ?
C84 H84A 0.9800 . ?
C84 H84B 0.9800 . ?
C84 H84C 0.9800 . ?
C85 H85A 0.9800 . ?
C85 H85B 0.9800 . ?
C85 H85C 0.9800 . ?
C86 H86A 0.9800 . ?
C86 H86B 0.9800 . ?
C86 H86C 0.9800 . ?
C87 C88 1.391(4) . ?
C87 C92 1.405(3) . ?
C88 C89 1.387(4) . ?
C88 H88 0.9500 . ?
C89 C90 1.405(4) . ?
C89 H89 0.9500 . ?
C90 C91 1.385(4) . ?
C90 C93 1.531(4) . ?
C91 C92 1.392(4) . ?
C91 H91 0.9500 . ?
C92 H92 0.9500 . ?
C93 C95 1.527(5) . ?
C93 C94 1.539(5) . ?
C93 C96 1.543(5) . ?
C94 H94A 0.9800 . ?
C94 H94B 0.9800 . ?
C94 H94C 0.9800 . ?
C95 H95A 0.9800 . ?
C95 H95B 0.9800 . ?
C95 H95C 0.9800 . ?
C96 H96A 0.9800 . ?
C96 H96B 0.9800 . ?
C96 H96C 0.9800 . ?
C1S C2S 1.426(8) . ?
C1S H1S1 0.9800 . ?
C1S H1S2 0.9800 . ?
C1S H1S3 0.9800 . ?
C2S N1S 1.164(7) . ?
C3S C4S 1.431(5) . ?
C3S H3S1 0.9800 . ?
C3S H3S2 0.9800 . ?
C3S H3S3 0.9800 . ?
C4S N2S 1.143(5) . ?
 
loop_
 _geom_angle_atom_site_label_1
 _geom_angle_atom_site_label_2
 _geom_angle_atom_site_label_3
 _geom_angle
 _geom_angle_site_symmetry_1
 _geom_angle_site_symmetry_3
 _geom_angle_publ_flag
O1 Mn1 N2 108.66(10) . . ?
O1 Mn1 N1 109.62(9) . . ?
N2 Mn1 N1 77.76(8) . . ?
O1 Mn1 N4 106.59(9) . . ?
N2 Mn1 N4 85.51(8) . . ?
N1 Mn1 N4 143.34(9) . . ?
O1 Mn1 N6 108.07(10) . . ?
N2 Mn1 N6 142.92(9) . . ?
N1 Mn1 N6 85.49(8) . . ?
N4 Mn1 N6 88.81(8) . . ?
C1 N1 C4 110.21(18) . . ?
C1 N1 Mn1 128.21(16) . . ?
C4 N1 Mn1 118.01(16) . . ?
C8 N2 C5 109.7(2) . . ?
C8 N2 Mn1 128.51(15) . . ?
C5 N2 Mn1 118.03(16) . . ?
C9 N4 C12 107.30(18) . . ?
C9 N4 Mn1 125.83(15) . . ?
C12 N4 Mn1 125.13(16) . . ?
C13 N6 C16 107.05(19) . . ?
C13 N6 Mn1 124.74(16) . . ?
C16 N6 Mn1 125.81(15) . . ?
N7 C1 N1 124.8(2) . . ?
N7 C1 C2 127.4(2) . . ?
N1 C1 C2 107.8(2) . . ?
C3 C2 C1 107.2(2) . . ?
C3 C2 C57 128.7(2) . . ?
C1 C2 C57 123.4(2) . . ?
C2 C3 C4 107.2(2) . . ?
C2 C3 C67 123.9(2) . . ?
C4 C3 C67 128.8(2) . . ?
N1 C4 C3 107.6(2) . . ?
N1 C4 C5 109.26(19) . . ?
C3 C4 C5 143.2(2) . . ?
N2 C5 C6 107.6(2) . . ?
N2 C5 C4 109.5(2) . . ?
C6 C5 C4 142.8(2) . . ?
C7 C6 C5 107.7(2) . . ?
C7 C6 C77 123.6(2) . . ?
C5 C6 C77 128.6(2) . . ?
C6 C7 C8 107.2(2) . . ?
C6 C7 C87 130.1(2) . . ?
C8 C7 C87 122.7(2) . . ?
N3 C8 N2 124.5(2) . . ?
N3 C8 C7 127.7(2) . . ?
N2 C8 C7 107.8(2) . . ?
N3 C9 N4 127.6(2) . . ?
N3 C9 C10 123.3(2) . . ?
N4 C9 C10 109.06(19) . . ?
C11 C10 C9 107.2(2) . . ?
C11 C10 C17 129.0(2) . . ?
C9 C10 C17 123.1(2) . . ?
C10 C11 C12 107.1(2) . . ?
C10 C11 C27 127.9(2) . . ?
C12 C11 C27 124.9(2) . . ?
N5 C12 N4 126.3(2) . . ?
N5 C12 C11 124.4(2) . . ?
N4 C12 C11 109.3(2) . . ?
N5 C13 N6 126.1(2) . . ?
N5 C13 C14 124.3(2) . . ?
N6 C13 C14 109.53(19) . . ?
C15 C14 C13 106.8(2) . . ?
C15 C14 C37 130.2(2) . . ?
C13 C14 C37 122.8(2) . . ?
C14 C15 C16 107.5(2) . . ?
C14 C15 C47 129.5(2) . . ?
C16 C15 C47 123.0(2) . . ?
N7 C16 N6 126.6(2) . . ?
N7 C16 C15 124.2(2) . . ?
N6 C16 C15 109.15(19) . . ?
C9 N3 C8 118.8(2) . . ?
C13 N5 C12 121.5(2) . . ?
C16 N7 C1 119.4(2) . . ?
C22 C17 C18 117.8(2) . . ?
C22 C17 C10 119.6(2) . . ?
C18 C17 C10 122.5(2) . . ?
C19 C18 C17 120.5(2) . . ?
C19 C18 H18 119.7 . . ?
C17 C18 H18 119.7 . . ?
C18 C19 C20 121.8(2) . . ?
C18 C19 H19 119.1 . . ?
C20 C19 H19 119.1 . . ?
C21 C20 C19 117.3(2) . . ?
C21 C20 C23 122.2(2) . . ?
C19 C20 C23 120.5(2) . . ?
C22 C21 C20 121.4(2) . . ?
C22 C21 H21 119.3 . . ?
C20 C21 H21 119.3 . . ?
C21 C22 C17 121.2(2) . . ?
C21 C22 H22 119.4 . . ?
C17 C22 H22 119.4 . . ?
C20 C23 C25 109.0(2) . . ?
C20 C23 C26 112.2(2) . . ?
C25 C23 C26 108.5(3) . . ?
C20 C23 C24 108.9(2) . . ?
C25 C23 C24 109.8(3) . . ?
C26 C23 C24 108.4(3) . . ?
C23 C24 H24A 109.5 . . ?
C23 C24 H24B 109.5 . . ?
H24A C24 H24B 109.5 . . ?
C23 C24 H24C 109.5 . . ?
H24A C24 H24C 109.5 . . ?
H24B C24 H24C 109.5 . . ?
C23 C25 H25A 109.5 . . ?
C23 C25 H25B 109.5 . . ?
H25A C25 H25B 109.5 . . ?
C23 C25 H25C 109.5 . . ?
H25A C25 H25C 109.5 . . ?
H25B C25 H25C 109.5 . . ?
C23 C26 H26A 109.5 . . ?
C23 C26 H26B 109.5 . . ?
H26A C26 H26B 109.5 . . ?
C23 C26 H26C 109.5 . . ?
H26A C26 H26C 109.5 . . ?
H26B C26 H26C 109.5 . . ?
C28 C27 C32 118.1(2) . . ?
C28 C27 C11 120.2(2) . . ?
C32 C27 C11 121.7(2) . . ?
C29 C28 C27 120.6(2) . . ?
C29 C28 H28 119.7 . . ?
C27 C28 H28 119.7 . . ?
C28 C29 C30 121.9(2) . . ?
C28 C29 H29 119.0 . . ?
C30 C29 H29 119.0 . . ?
C31 C30 C29 116.7(2) . . ?
C31 C30 C33 122.6(2) . . ?
C29 C30 C33 120.6(2) . . ?
C32 C31 C30 122.1(2) . . ?
C32 C31 H31 118.9 . . ?
C30 C31 H31 118.9 . . ?
C31 C32 C27 120.4(2) . . ?
C31 C32 H32 119.8 . . ?
C27 C32 H32 119.8 . . ?
C30 C33 C36 107.8(2) . . ?
C30 C33 C34 110.6(2) . . ?
C36 C33 C34 109.4(2) . . ?
C30 C33 C35 111.90(19) . . ?
C36 C33 C35 109.0(2) . . ?
C34 C33 C35 108.1(2) . . ?
C33 C34 H34A 109.5 . . ?
C33 C34 H34B 109.5 . . ?
H34A C34 H34B 109.5 . . ?
C33 C34 H34C 109.5 . . ?
H34A C34 H34C 109.5 . . ?
H34B C34 H34C 109.5 . . ?
C33 C35 H35A 109.5 . . ?
C33 C35 H35B 109.5 . . ?
H35A C35 H35B 109.5 . . ?
C33 C35 H35C 109.5 . . ?
H35A C35 H35C 109.5 . . ?
H35B C35 H35C 109.5 . . ?
C33 C36 H36A 109.5 . . ?
C33 C36 H36B 109.5 . . ?
H36A C36 H36B 109.5 . . ?
C33 C36 H36C 109.5 . . ?
H36A C36 H36C 109.5 . . ?
H36B C36 H36C 109.5 . . ?
C38 C37 C42 117.6(2) . . ?
C38 C37 C14 121.0(2) . . ?
C42 C37 C14 121.2(2) . . ?
C39 C38 C37 121.1(2) . . ?
C39 C38 H38 119.5 . . ?
C37 C38 H38 119.5 . . ?
C40 C39 C38 121.7(2) . . ?
C40 C39 H39 119.2 . . ?
C38 C39 H39 119.2 . . ?
C39 C40 C41 117.1(2) . . ?
C39 C40 C43 123.1(2) . . ?
C41 C40 C43 119.8(2) . . ?
C42 C41 C40 121.4(2) . . ?
C42 C41 H41 119.3 . . ?
C40 C41 H41 119.3 . . ?
C41 C42 C37 121.1(2) . . ?
C41 C42 H42 119.4 . . ?
C37 C42 H42 119.4 . . ?
C40 C43 C45 108.9(2) . . ?
C40 C43 C44 111.6(2) . . ?
C45 C43 C44 108.7(3) . . ?
C40 C43 C46 110.3(2) . . ?
C45 C43 C46 109.2(3) . . ?
C44 C43 C46 108.1(2) . . ?
C43 C44 H44A 109.5 . . ?
C43 C44 H44B 109.5 . . ?
H44A C44 H44B 109.5 . . ?
C43 C44 H44C 109.5 . . ?
H44A C44 H44C 109.5 . . ?
H44B C44 H44C 109.5 . . ?
C43 C45 H45A 109.5 . . ?
C43 C45 H45B 109.5 . . ?
H45A C45 H45B 109.5 . . ?
C43 C45 H45C 109.5 . . ?
H45A C45 H45C 109.5 . . ?
H45B C45 H45C 109.5 . . ?
C43 C46 H46A 109.5 . . ?
C43 C46 H46B 109.5 . . ?
H46A C46 H46B 109.5 . . ?
C43 C46 H46C 109.5 . . ?
H46A C46 H46C 109.5 . . ?
H46B C46 H46C 109.5 . . ?
C52 C47 C48 117.4(3) . . ?
C52 C47 C15 120.9(3) . . ?
C48 C47 C15 121.6(2) . . ?
C49 C48 C47 120.7(3) . . ?
C49 C48 H48 119.6 . . ?
C47 C48 H48 119.6 . . ?
C48 C49 C50 121.5(3) . . ?
C48 C49 H49 119.2 . . ?
C50 C49 H49 119.2 . . ?
C51 C50 C49 117.4(3) . . ?
C51 C50 C53 123.0(3) . . ?
C49 C50 C53 119.6(3) . . ?
C50 C51 C52 121.7(3) . . ?
C50 C51 H51 119.1 . . ?
C52 C51 H51 119.1 . . ?
C51 C52 C47 121.2(3) . . ?
C51 C52 H52 119.4 . . ?
C47 C52 H52 119.4 . . ?
C54 C53 C50 109.9(3) . . ?
C54 C53 C55 110.1(4) . . ?
C50 C53 C55 109.2(3) . . ?
C54 C53 C56 108.2(4) . . ?
C50 C53 C56 111.9(3) . . ?
C55 C53 C56 107.6(4) . . ?
C53 C54 H54A 109.5 . . ?
C53 C54 H54B 109.5 . . ?
H54A C54 H54B 109.5 . . ?
C53 C54 H54C 109.5 . . ?
H54A C54 H54C 109.5 . . ?
H54B C54 H54C 109.5 . . ?
C53 C55 H55A 109.5 . . ?
C53 C55 H55B 109.5 . . ?
H55A C55 H55B 109.5 . . ?
C53 C55 H55C 109.5 . . ?
H55A C55 H55C 109.5 . . ?
H55B C55 H55C 109.5 . . ?
C53 C56 H56A 109.5 . . ?
C53 C56 H56B 109.5 . . ?
H56A C56 H56B 109.5 . . ?
C53 C56 H56C 109.5 . . ?
H56A C56 H56C 109.5 . . ?
H56B C56 H56C 109.5 . . ?
C49' C48' H48' 120.5 . . ?
C48' C49' C50' 121(2) . . ?
C48' C49' H49' 119.5 . . ?
C50' C49' H49' 119.5 . . ?
C51' C50' C49' 117.9(18) . . ?
C51' C50' C53' 120(2) . . ?
C49' C50' C53' 121(2) . . ?
C52' C51' C50' 120(3) . . ?
C52' C51' H51' 120.2 . . ?
C50' C51' H51' 120.2 . . ?
C51' C52' H52' 121.1 . . ?
C54' C53' C50' 111.4(19) . . ?
C54' C53' C55' 111(2) . . ?
C50' C53' C55' 109(2) . . ?
C54' C53' C56' 108(2) . . ?
C50' C53' C56' 109(2) . . ?
C55' C53' C56' 109(2) . . ?
C53' C54' H54D 109.5 . . ?
C53' C54' H54E 109.5 . . ?
H54D C54' H54E 109.5 . . ?
C53' C54' H54F 109.5 . . ?
H54D C54' H54F 109.5 . . ?
H54E C54' H54F 109.5 . . ?
C53' C55' H55D 109.5 . . ?
C53' C55' H55E 109.5 . . ?
H55D C55' H55E 109.5 . . ?
C53' C55' H55F 109.5 . . ?
H55D C55' H55F 109.5 . . ?
H55E C55' H55F 109.5 . . ?
C53' C56' H56D 109.5 . . ?
C53' C56' H56E 109.5 . . ?
H56D C56' H56E 109.5 . . ?
C53' C56' H56F 109.5 . . ?
H56D C56' H56F 109.5 . . ?
H56E C56' H56F 109.5 . . ?
C58 C57 C62 117.1(2) . . ?
C58 C57 C2 120.9(2) . . ?
C62 C57 C2 121.7(2) . . ?
C59 C58 C57 121.5(2) . . ?
C59 C58 H58 119.2 . . ?
C57 C58 H58 119.2 . . ?
C58 C59 C60 121.9(2) . . ?
C58 C59 H59 119.1 . . ?
C60 C59 H59 119.1 . . ?
C59 C60 C61 116.4(3) . . ?
C59 C60 C63 123.0(3) . . ?
C61 C60 C63 120.6(3) . . ?
C62 C61 C60 122.1(3) . . ?
C62 C61 H61 119.0 . . ?
C60 C61 H61 119.0 . . ?
C61 C62 C57 120.9(2) . . ?
C61 C62 H62 119.5 . . ?
C57 C62 H62 119.5 . . ?
C60 C63 C65 109.2(3) . . ?
C60 C63 C64 112.7(3) . . ?
C65 C63 C64 107.6(3) . . ?
C60 C63 C66 109.0(3) . . ?
C65 C63 C66 109.5(3) . . ?
C64 C63 C66 108.8(3) . . ?
C63 C64 H64A 109.5 . . ?
C63 C64 H64B 109.5 . . ?
H64A C64 H64B 109.5 . . ?
C63 C64 H64C 109.5 . . ?
H64A C64 H64C 109.5 . . ?
H64B C64 H64C 109.5 . . ?
C63 C65 H65A 109.5 . . ?
C63 C65 H65B 109.5 . . ?
H65A C65 H65B 109.5 . . ?
C63 C65 H65C 109.5 . . ?
H65A C65 H65C 109.5 . . ?
H65B C65 H65C 109.5 . . ?
C63 C66 H66A 109.5 . . ?
C63 C66 H66B 109.5 . . ?
H66A C66 H66B 109.5 . . ?
C63 C66 H66C 109.5 . . ?
H66A C66 H66C 109.5 . . ?
H66B C66 H66C 109.5 . . ?
C68 C67 C72 118.4(2) . . ?
C68 C67 C3 122.1(2) . . ?
C72 C67 C3 119.1(2) . . ?
C67 C68 C69 120.5(2) . . ?
C67 C68 H68 119.8 . . ?
C69 C68 H68 119.8 . . ?
C70 C69 C68 121.7(2) . . ?
C70 C69 H69 119.2 . . ?
C68 C69 H69 119.2 . . ?
C69 C70 C71 117.0(2) . . ?
C69 C70 C73 123.2(2) . . ?
C71 C70 C73 119.7(2) . . ?
C72 C71 C70 121.5(2) . . ?
C72 C71 H71 119.2 . . ?
C70 C71 H71 119.2 . . ?
C71 C72 C67 120.7(2) . . ?
C71 C72 H72 119.7 . . ?
C67 C72 H72 119.7 . . ?
C74 C73 C75 109.4(2) . . ?
C74 C73 C70 112.51(19) . . ?
C75 C73 C70 109.5(2) . . ?
C74 C73 C76 107.7(2) . . ?
C75 C73 C76 109.0(2) . . ?
C70 C73 C76 108.7(2) . . ?
C73 C74 H74A 109.5 . . ?
C73 C74 H74B 109.5 . . ?
H74A C74 H74B 109.5 . . ?
C73 C74 H74C 109.5 . . ?
H74A C74 H74C 109.5 . . ?
H74B C74 H74C 109.5 . . ?
C73 C75 H75A 109.5 . . ?
C73 C75 H75B 109.5 . . ?
H75A C75 H75B 109.5 . . ?
C73 C75 H75C 109.5 . . ?
H75A C75 H75C 109.5 . . ?
H75B C75 H75C 109.5 . . ?
C73 C76 H76A 109.5 . . ?
C73 C76 H76B 109.5 . . ?
H76A C76 H76B 109.5 . . ?
C73 C76 H76C 109.5 . . ?
H76A C76 H76C 109.5 . . ?
H76B C76 H76C 109.5 . . ?
C82 C77 C78 118.0(2) . . ?
C82 C77 C6 123.9(2) . . ?
C78 C77 C6 117.9(2) . . ?
C79 C78 C77 120.8(2) . . ?
C79 C78 H78 119.6 . . ?
C77 C78 H78 119.6 . . ?
C78 C79 C80 121.5(2) . . ?
C78 C79 H79 119.3 . . ?
C80 C79 H79 119.3 . . ?
C81 C80 C79 117.4(2) . . ?
C81 C80 C83 124.2(2) . . ?
C79 C80 C83 118.4(2) . . ?
C80 C81 C82 121.8(2) . . ?
C80 C81 H81 119.1 . . ?
C82 C81 H81 119.1 . . ?
C81 C82 C77 120.5(2) . . ?
C81 C82 H82 119.7 . . ?
C77 C82 H82 119.7 . . ?
C85 C83 C86 109.0(2) . . ?
C85 C83 C80 111.7(2) . . ?
C86 C83 C80 108.7(2) . . ?
C85 C83 C84 108.7(2) . . ?
C86 C83 C84 108.8(2) . . ?
C80 C83 C84 109.9(2) . . ?
C83 C84 H84A 109.5 . . ?
C83 C84 H84B 109.5 . . ?
H84A C84 H84B 109.5 . . ?
C83 C84 H84C 109.5 . . ?
H84A C84 H84C 109.5 . . ?
H84B C84 H84C 109.5 . . ?
C83 C85 H85A 109.5 . . ?
C83 C85 H85B 109.5 . . ?
H85A C85 H85B 109.5 . . ?
C83 C85 H85C 109.5 . . ?
H85A C85 H85C 109.5 . . ?
H85B C85 H85C 109.5 . . ?
C83 C86 H86A 109.5 . . ?
C83 C86 H86B 109.5 . . ?
H86A C86 H86B 109.5 . . ?
C83 C86 H86C 109.5 . . ?
H86A C86 H86C 109.5 . . ?
H86B C86 H86C 109.5 . . ?
C88 C87 C92 117.3(2) . . ?
C88 C87 C7 121.0(2) . . ?
C92 C87 C7 121.7(2) . . ?
C89 C88 C87 121.5(3) . . ?
C89 C88 H88 119.2 . . ?
C87 C88 H88 119.2 . . ?
C88 C89 C90 121.3(3) . . ?
C88 C89 H89 119.3 . . ?
C90 C89 H89 119.3 . . ?
C91 C90 C89 117.0(3) . . ?
C91 C90 C93 123.9(3) . . ?
C89 C90 C93 119.1(3) . . ?
C90 C91 C92 122.0(3) . . ?
C90 C91 H91 119.0 . . ?
C92 C91 H91 119.0 . . ?
C91 C92 C87 120.8(3) . . ?
C91 C92 H92 119.6 . . ?
C87 C92 H92 119.6 . . ?
C95 C93 C90 112.2(3) . . ?
C95 C93 C94 108.6(3) . . ?
C90 C93 C94 109.0(3) . . ?
C95 C93 C96 108.4(3) . . ?
C90 C93 C96 110.1(3) . . ?
C94 C93 C96 108.5(3) . . ?
C93 C94 H94A 109.5 . . ?
C93 C94 H94B 109.5 . . ?
H94A C94 H94B 109.5 . . ?
C93 C94 H94C 109.5 . . ?
H94A C94 H94C 109.5 . . ?
H94B C94 H94C 109.5 . . ?
C93 C95 H95A 109.5 . . ?
C93 C95 H95B 109.5 . . ?
H95A C95 H95B 109.5 . . ?
C93 C95 H95C 109.5 . . ?
H95A C95 H95C 109.5 . . ?
H95B C95 H95C 109.5 . . ?
C93 C96 H96A 109.5 . . ?
C93 C96 H96B 109.5 . . ?
H96A C96 H96B 109.5 . . ?
C93 C96 H96C 109.5 . . ?
H96A C96 H96C 109.5 . . ?
H96B C96 H96C 109.5 . . ?
C2S C1S H1S1 109.5 . . ?
C2S C1S H1S2 109.5 . . ?
H1S1 C1S H1S2 109.5 . . ?
C2S C1S H1S3 109.5 . . ?
H1S1 C1S H1S3 109.5 . . ?
H1S2 C1S H1S3 109.5 . . ?
N1S C2S C1S 177.9(7) . . ?
C4S C3S H3S1 109.5 . . ?
C4S C3S H3S2 109.5 . . ?
H3S1 C3S H3S2 109.5 . . ?
C4S C3S H3S3 109.5 . . ?
H3S1 C3S H3S3 109.5 . . ?
H3S2 C3S H3S3 109.5 . . ?
N2S C4S C3S 179.6(5) . . ?
 
loop_
 _geom_torsion_atom_site_label_1
 _geom_torsion_atom_site_label_2
 _geom_torsion_atom_site_label_3
 _geom_torsion_atom_site_label_4
 _geom_torsion
 _geom_torsion_site_symmetry_1
 _geom_torsion_site_symmetry_2
 _geom_torsion_site_symmetry_3
 _geom_torsion_site_symmetry_4
 _geom_torsion_publ_flag
O1 Mn1 N1 C1 -75.0(2) . . . . ?
N2 Mn1 N1 C1 179.3(2) . . . . ?
N4 Mn1 N1 C1 114.5(2) . . . . ?
N6 Mn1 N1 C1 32.6(2) . . . . ?
O1 Mn1 N1 C4 81.45(19) . . . . ?
N2 Mn1 N1 C4 -24.23(17) . . . . ?
N4 Mn1 N1 C4 -89.0(2) . . . . ?
N6 Mn1 N1 C4 -170.96(18) . . . . ?
O1 Mn1 N2 C8 73.3(2) . . . . ?
N1 Mn1 N2 C8 -179.9(2) . . . . ?
N4 Mn1 N2 C8 -32.7(2) . . . . ?
N6 Mn1 N2 C8 -114.8(2) . . . . ?
O1 Mn1 N2 C5 -82.59(19) . . . . ?
N1 Mn1 N2 C5 24.23(17) . . . . ?
N4 Mn1 N2 C5 171.41(18) . . . . ?
N6 Mn1 N2 C5 89.4(2) . . . . ?
O1 Mn1 N4 C9 -80.8(2) . . . . ?
N2 Mn1 N4 C9 27.39(19) . . . . ?
N1 Mn1 N4 C9 89.9(2) . . . . ?
N6 Mn1 N4 C9 170.72(19) . . . . ?
O1 Mn1 N4 C12 82.27(19) . . . . ?
N2 Mn1 N4 C12 -169.58(19) . . . . ?
N1 Mn1 N4 C12 -107.1(2) . . . . ?
N6 Mn1 N4 C12 -26.25(18) . . . . ?
O1 Mn1 N6 C13 -79.3(2) . . . . ?
N2 Mn1 N6 C13 108.7(2) . . . . ?
N1 Mn1 N6 C13 171.5(2) . . . . ?
N4 Mn1 N6 C13 27.74(19) . . . . ?
O1 Mn1 N6 C16 80.8(2) . . . . ?
N2 Mn1 N6 C16 -91.2(2) . . . . ?
N1 Mn1 N6 C16 -28.42(19) . . . . ?
N4 Mn1 N6 C16 -172.17(19) . . . . ?
C4 N1 C1 N7 178.3(2) . . . . ?
Mn1 N1 C1 N7 -23.8(3) . . . . ?
C4 N1 C1 C2 -1.4(3) . . . . ?
Mn1 N1 C1 C2 156.47(16) . . . . ?
N7 C1 C2 C3 -177.8(2) . . . . ?
N1 C1 C2 C3 1.9(3) . . . . ?
N7 C1 C2 C57 11.0(4) . . . . ?
N1 C1 C2 C57 -169.3(2) . . . . ?
C1 C2 C3 C4 -1.7(3) . . . . ?
C57 C2 C3 C4 168.9(2) . . . . ?
C1 C2 C3 C67 179.8(2) . . . . ?
C57 C2 C3 C67 -9.6(4) . . . . ?
C1 N1 C4 C3 0.4(3) . . . . ?
Mn1 N1 C4 C3 -160.05(15) . . . . ?
C1 N1 C4 C5 -179.85(19) . . . . ?
Mn1 N1 C4 C5 19.7(2) . . . . ?
C2 C3 C4 N1 0.8(3) . . . . ?
C67 C3 C4 N1 179.3(2) . . . . ?
C2 C3 C4 C5 -178.8(3) . . . . ?
C67 C3 C4 C5 -0.4(5) . . . . ?
C8 N2 C5 C6 -1.5(3) . . . . ?
Mn1 N2 C5 C6 158.62(16) . . . . ?
C8 N2 C5 C4 180.00(19) . . . . ?
Mn1 N2 C5 C4 -19.9(3) . . . . ?
N1 C4 C5 N2 0.0(3) . . . . ?
C3 C4 C5 N2 179.7(3) . . . . ?
N1 C4 C5 C6 -177.6(3) . . . . ?
C3 C4 C5 C6 2.0(6) . . . . ?
N2 C5 C6 C7 0.8(3) . . . . ?
C4 C5 C6 C7 178.4(3) . . . . ?
N2 C5 C6 C77 -174.7(2) . . . . ?
C4 C5 C6 C77 3.0(5) . . . . ?
C5 C6 C7 C8 0.2(3) . . . . ?
C77 C6 C7 C8 175.9(2) . . . . ?
C5 C6 C7 C87 -179.6(2) . . . . ?
C77 C6 C7 C87 -3.9(4) . . . . ?
C5 N2 C8 N3 -175.9(2) . . . . ?
Mn1 N2 C8 N3 26.7(3) . . . . ?
C5 N2 C8 C7 1.6(3) . . . . ?
Mn1 N2 C8 C7 -155.84(17) . . . . ?
C6 C7 C8 N3 176.3(2) . . . . ?
C87 C7 C8 N3 -3.9(4) . . . . ?
C6 C7 C8 N2 -1.1(3) . . . . ?
C87 C7 C8 N2 178.7(2) . . . . ?
C12 N4 C9 N3 177.2(2) . . . . ?
Mn1 N4 C9 N3 -17.3(3) . . . . ?
C12 N4 C9 C10 -0.4(2) . . . . ?
Mn1 N4 C9 C10 165.13(15) . . . . ?
N3 C9 C10 C11 -177.2(2) . . . . ?
N4 C9 C10 C11 0.5(3) . . . . ?
N3 C9 C10 C17 -6.1(3) . . . . ?
N4 C9 C10 C17 171.6(2) . . . . ?
C9 C10 C11 C12 -0.3(2) . . . . ?
C17 C10 C11 C12 -170.7(2) . . . . ?
C9 C10 C11 C27 177.9(2) . . . . ?
C17 C10 C11 C27 7.5(4) . . . . ?
C9 N4 C12 N5 -178.2(2) . . . . ?
Mn1 N4 C12 N5 16.1(3) . . . . ?
C9 N4 C12 C11 0.2(2) . . . . ?
Mn1 N4 C12 C11 -165.46(15) . . . . ?
C10 C11 C12 N5 178.5(2) . . . . ?
C27 C11 C12 N5 0.2(4) . . . . ?
C10 C11 C12 N4 0.1(3) . . . . ?
C27 C11 C12 N4 -178.2(2) . . . . ?
C16 N6 C13 N5 177.4(2) . . . . ?
Mn1 N6 C13 N5 -19.4(3) . . . . ?
C16 N6 C13 C14 0.6(3) . . . . ?
Mn1 N6 C13 C14 163.82(15) . . . . ?
N5 C13 C14 C15 -176.9(2) . . . . ?
N6 C13 C14 C15 -0.1(3) . . . . ?
N5 C13 C14 C37 -2.8(4) . . . . ?
N6 C13 C14 C37 174.0(2) . . . . ?
C13 C14 C15 C16 -0.4(3) . . . . ?
C37 C14 C15 C16 -174.0(2) . . . . ?
C13 C14 C15 C47 178.5(2) . . . . ?
C37 C14 C15 C47 4.9(4) . . . . ?
C13 N6 C16 N7 179.6(2) . . . . ?
Mn1 N6 C16 N7 16.6(3) . . . . ?
C13 N6 C16 C15 -0.9(3) . . . . ?
Mn1 N6 C16 C15 -163.84(15) . . . . ?
C14 C15 C16 N7 -179.6(2) . . . . ?
C47 C15 C16 N7 1.4(4) . . . . ?
C14 C15 C16 N6 0.8(3) . . . . ?
C47 C15 C16 N6 -178.2(2) . . . . ?
N4 C9 N3 C8 -1.4(4) . . . . ?
C10 C9 N3 C8 175.8(2) . . . . ?
N2 C8 N3 C9 -2.7(4) . . . . ?
C7 C8 N3 C9 -179.6(2) . . . . ?
N6 C13 N5 C12 -1.7(4) . . . . ?
C14 C13 N5 C12 174.6(2) . . . . ?
N4 C12 N5 C13 3.5(3) . . . . ?
C11 C12 N5 C13 -174.7(2) . . . . ?
N6 C16 N7 C1 5.1(4) . . . . ?
C15 C16 N7 C1 -174.4(2) . . . . ?
N1 C1 N7 C16 -2.0(3) . . . . ?
C2 C1 N7 C16 177.7(2) . . . . ?
C11 C10 C17 C22 40.8(4) . . . . ?
C9 C10 C17 C22 -128.2(2) . . . . ?
C11 C10 C17 C18 -142.8(3) . . . . ?
C9 C10 C17 C18 48.2(3) . . . . ?
C22 C17 C18 C19 0.6(4) . . . . ?
C10 C17 C18 C19 -175.9(2) . . . . ?
C17 C18 C19 C20 0.4(4) . . . . ?
C18 C19 C20 C21 -1.2(4) . . . . ?
C18 C19 C20 C23 178.1(2) . . . . ?
C19 C20 C21 C22 0.9(4) . . . . ?
C23 C20 C21 C22 -178.4(2) . . . . ?
C20 C21 C22 C17 0.1(4) . . . . ?
C18 C17 C22 C21 -0.9(4) . . . . ?
C10 C17 C22 C21 175.7(2) . . . . ?
C21 C20 C23 C25 -120.0(3) . . . . ?
C19 C20 C23 C25 60.8(4) . . . . ?
C21 C20 C23 C26 0.2(4) . . . . ?
C19 C20 C23 C26 -179.0(3) . . . . ?
C21 C20 C23 C24 120.2(3) . . . . ?
C19 C20 C23 C24 -59.0(3) . . . . ?
C10 C11 C27 C28 41.7(4) . . . . ?
C12 C11 C27 C28 -140.4(2) . . . . ?
C10 C11 C27 C32 -135.8(3) . . . . ?
C12 C11 C27 C32 42.2(3) . . . . ?
C32 C27 C28 C29 1.3(4) . . . . ?
C11 C27 C28 C29 -176.2(2) . . . . ?
C27 C28 C29 C30 1.3(4) . . . . ?
C28 C29 C30 C31 -2.7(4) . . . . ?
C28 C29 C30 C33 -179.9(2) . . . . ?
C29 C30 C31 C32 1.5(4) . . . . ?
C33 C30 C31 C32 178.7(2) . . . . ?
C30 C31 C32 C27 1.0(4) . . . . ?
C28 C27 C32 C31 -2.5(4) . . . . ?
C11 C27 C32 C31 175.0(2) . . . . ?
C31 C30 C33 C36 -94.1(3) . . . . ?
C29 C30 C33 C36 83.0(3) . . . . ?
C31 C30 C33 C34 146.4(2) . . . . ?
C29 C30 C33 C34 -36.5(3) . . . . ?
C31 C30 C33 C35 25.8(4) . . . . ?
C29 C30 C33 C35 -157.1(3) . . . . ?
C15 C14 C37 C38 -146.3(3) . . . . ?
C13 C14 C37 C38 41.0(3) . . . . ?
C15 C14 C37 C42 37.2(4) . . . . ?
C13 C14 C37 C42 -135.5(2) . . . . ?
C42 C37 C38 C39 -0.3(4) . . . . ?
C14 C37 C38 C39 -176.9(2) . . . . ?
C37 C38 C39 C40 0.6(4) . . . . ?
C38 C39 C40 C41 -0.3(4) . . . . ?
C38 C39 C40 C43 177.0(2) . . . . ?
C39 C40 C41 C42 -0.3(4) . . . . ?
C43 C40 C41 C42 -177.6(3) . . . . ?
C40 C41 C42 C37 0.6(4) . . . . ?
C38 C37 C42 C41 -0.3(4) . . . . ?
C14 C37 C42 C41 176.3(2) . . . . ?
C39 C40 C43 C45 -110.6(3) . . . . ?
C41 C40 C43 C45 66.6(3) . . . . ?
C39 C40 C43 C44 9.4(4) . . . . ?
C41 C40 C43 C44 -173.4(3) . . . . ?
C39 C40 C43 C46 129.6(3) . . . . ?
C41 C40 C43 C46 -53.2(3) . . . . ?
C14 C15 C47 C52 -134.1(5) . . . . ?
C16 C15 C47 C52 44.6(5) . . . . ?
C14 C15 C47 C48 43.5(6) . . . . ?
C16 C15 C47 C48 -137.8(5) . . . . ?
C52 C47 C48 C49 -1.4(9) . . . . ?
C15 C47 C48 C49 -179.1(5) . . . . ?
C47 C48 C49 C50 0.3(10) . . . . ?
C48 C49 C50 C51 -0.1(10) . . . . ?
C48 C49 C50 C53 -179.6(5) . . . . ?
C49 C50 C51 C52 1.0(12) . . . . ?
C53 C50 C51 C52 -179.5(7) . . . . ?
C50 C51 C52 C47 -2.3(13) . . . . ?
C48 C47 C52 C51 2.4(10) . . . . ?
C15 C47 C52 C51 -179.9(6) . . . . ?
C51 C50 C53 C54 125.9(7) . . . . ?
C49 C50 C53 C54 -54.7(6) . . . . ?
C51 C50 C53 C55 -113.3(8) . . . . ?
C49 C50 C53 C55 66.2(6) . . . . ?
C51 C50 C53 C56 5.7(8) . . . . ?
C49 C50 C53 C56 -174.9(5) . . . . ?
C48' C49' C50' C51' -6(11) . . . . ?
C48' C49' C50' C53' 178(6) . . . . ?
C49' C50' C51' C52' -12(13) . . . . ?
C53' C50' C51' C52' 163(7) . . . . ?
C51' C50' C53' C54' 169(7) . . . . ?
C49' C50' C53' C54' -16(6) . . . . ?
C51' C50' C53' C55' -68(8) . . . . ?
C49' C50' C53' C55' 107(6) . . . . ?
C51' C50' C53' C56' 50(8) . . . . ?
C49' C50' C53' C56' -135(6) . . . . ?
C3 C2 C57 C58 -35.4(4) . . . . ?
C1 C2 C57 C58 133.9(3) . . . . ?
C3 C2 C57 C62 151.0(3) . . . . ?
C1 C2 C57 C62 -39.7(4) . . . . ?
C62 C57 C58 C59 2.3(4) . . . . ?
C2 C57 C58 C59 -171.6(2) . . . . ?
C57 C58 C59 C60 -0.6(4) . . . . ?
C58 C59 C60 C61 -1.6(4) . . . . ?
C58 C59 C60 C63 176.7(3) . . . . ?
C59 C60 C61 C62 2.0(5) . . . . ?
C63 C60 C61 C62 -176.3(3) . . . . ?
C60 C61 C62 C57 -0.3(4) . . . . ?
C58 C57 C62 C61 -1.9(4) . . . . ?
C2 C57 C62 C61 171.9(2) . . . . ?
C59 C60 C63 C65 121.1(3) . . . . ?
C61 C60 C63 C65 -60.6(4) . . . . ?
C59 C60 C63 C64 1.5(5) . . . . ?
C61 C60 C63 C64 179.8(3) . . . . ?
C59 C60 C63 C66 -119.3(4) . . . . ?
C61 C60 C63 C66 59.0(4) . . . . ?
C2 C3 C67 C68 118.8(3) . . . . ?
C4 C3 C67 C68 -59.4(4) . . . . ?
C2 C3 C67 C72 -53.5(3) . . . . ?
C4 C3 C67 C72 128.3(3) . . . . ?
C72 C67 C68 C69 4.1(4) . . . . ?
C3 C67 C68 C69 -168.2(2) . . . . ?
C67 C68 C69 C70 -0.4(4) . . . . ?
C68 C69 C70 C71 -4.1(4) . . . . ?
C68 C69 C70 C73 174.1(2) . . . . ?
C69 C70 C71 C72 4.9(4) . . . . ?
C73 C70 C71 C72 -173.3(3) . . . . ?
C70 C71 C72 C67 -1.2(4) . . . . ?
C68 C67 C72 C71 -3.3(4) . . . . ?
C3 C67 C72 C71 169.2(2) . . . . ?
C69 C70 C73 C74 -5.7(4) . . . . ?
C71 C70 C73 C74 172.4(3) . . . . ?
C69 C70 C73 C75 116.1(3) . . . . ?
C71 C70 C73 C75 -65.8(3) . . . . ?
C69 C70 C73 C76 -124.9(3) . . . . ?
C71 C70 C73 C76 53.2(3) . . . . ?
C7 C6 C77 C82 118.6(3) . . . . ?
C5 C6 C77 C82 -66.6(4) . . . . ?
C7 C6 C77 C78 -56.5(3) . . . . ?
C5 C6 C77 C78 118.3(3) . . . . ?
C82 C77 C78 C79 -0.6(4) . . . . ?
C6 C77 C78 C79 174.7(3) . . . . ?
C77 C78 C79 C80 -0.6(4) . . . . ?
C78 C79 C80 C81 1.7(4) . . . . ?
C78 C79 C80 C83 -180.0(3) . . . . ?
C79 C80 C81 C82 -1.5(4) . . . . ?
C83 C80 C81 C82 -179.7(3) . . . . ?
C80 C81 C82 C77 0.3(4) . . . . ?
C78 C77 C82 C81 0.8(4) . . . . ?
C6 C77 C82 C81 -174.2(2) . . . . ?
C81 C80 C83 C85 -1.8(4) . . . . ?
C79 C80 C83 C85 -180.0(3) . . . . ?
C81 C80 C83 C86 118.6(3) . . . . ?
C79 C80 C83 C86 -59.6(3) . . . . ?
C81 C80 C83 C84 -122.4(3) . . . . ?
C79 C80 C83 C84 59.4(3) . . . . ?
C6 C7 C87 C88 144.4(3) . . . . ?
C8 C7 C87 C88 -35.4(4) . . . . ?
C6 C7 C87 C92 -36.4(4) . . . . ?
C8 C7 C87 C92 143.8(3) . . . . ?
C92 C87 C88 C89 0.2(4) . . . . ?
C7 C87 C88 C89 179.4(2) . . . . ?
C87 C88 C89 C90 0.0(4) . . . . ?
C88 C89 C90 C91 -0.2(4) . . . . ?
C88 C89 C90 C93 -179.3(3) . . . . ?
C89 C90 C91 C92 0.2(4) . . . . ?
C93 C90 C91 C92 179.3(3) . . . . ?
C90 C91 C92 C87 0.0(4) . . . . ?
C88 C87 C92 C91 -0.2(4) . . . . ?
C7 C87 C92 C91 -179.4(2) . . . . ?
C91 C90 C93 C95 3.8(4) . . . . ?
C89 C90 C93 C95 -177.1(3) . . . . ?
C91 C90 C93 C94 -116.5(4) . . . . ?
C89 C90 C93 C94 62.6(4) . . . . ?
C91 C90 C93 C96 124.6(3) . . . . ?
C89 C90 C93 C96 -56.3(4) . . . . ?
 
_refine_diff_density_max    0.409
_refine_diff_density_min   -0.505
_refine_diff_density_rms    0.051

_shelxl_version_number 2013-2

_shelx_res_file
;
TITL   xs0247a
CELL   1.54178    13.2613  16.7068  22.4780  75.669  75.927  78.815
ZERR         2     0.0004   0.0005   0.0008   0.003   0.003   0.003
LATT  1
SFAC C H N O Mn
UNIT 199.76 219.62 17.88 2 2

TEMP -163

ACTA
HTAB
BOND
BOND $H
CONF
WPDB

L.S. 6
FMAP 2
PLAN 10
OMIT -2 143.8

rem constraints
EADP Mn1 Mn1'
EADP O1 O1'
EADP N1 N1'
EXYZ N1 N1'
EADP N2 N2'
EXYZ N2 N2'
EADP N4 N4'
EXYZ N4 N4'
EADP N6 N6'
EXYZ N6 N6'

ABIN

WGHT    0.065500    1.499300
FVAR       1.73379   0.86715   0.91020   0.97392   0.96449
PART   1
MN1   5    0.046795    0.207186    0.006263    21.00000    0.01458    0.01705 =
         0.02007   -0.00755   -0.00353   -0.00495
N1    3    0.047889    0.286038    0.052972    21.00000    0.01960    0.02129 =
         0.02281   -0.00692   -0.00501   -0.01085
N2    3    0.068362    0.303370   -0.056368    21.00000    0.02302    0.01758 =
         0.02386   -0.00671   -0.00733   -0.00837
N4    3   -0.027633    0.180710   -0.046215    21.00000    0.01811    0.01973 =
         0.01861   -0.00705   -0.00391   -0.00718
N6    3   -0.052151    0.161150    0.076732    21.00000    0.01938    0.01990 =
         0.02099   -0.00853   -0.00346   -0.00845
O1    4    0.150770    0.146168    0.003377    21.00000    0.01960    0.02416 =
         0.02565   -0.00955   -0.00558   -0.00383

PART 2
SAME Mn1 > O1
MN1'  5   -0.042666    0.258388    0.009146   -21.00000    0.01458    0.01705 =
         0.02007   -0.00755   -0.00353   -0.00495
N1'   3    0.047889    0.286038    0.052972   -21.00000    0.01960    0.02129 =
         0.02281   -0.00692   -0.00501   -0.01085
N2'   3    0.068362    0.303370   -0.056368   -21.00000    0.02302    0.01758 =
         0.02386   -0.00671   -0.00733   -0.00837
N4'   3   -0.027633    0.180710   -0.046215   -21.00000    0.01811    0.01973 =
         0.01861   -0.00705   -0.00391   -0.00718
N6'   3   -0.052151    0.161150    0.076732   -21.00000    0.01938    0.01990 =
         0.02099   -0.00853   -0.00346   -0.00845
O1'   4   -0.148807    0.312300    0.011271   -21.00000    0.01960    0.02416 =
         0.02565   -0.00955   -0.00558   -0.00383

PART   0
C1    1    0.034963    0.275069    0.116236    11.00000    0.01562    0.02171 =
         0.02465   -0.01065   -0.00412   -0.00459
C2    1    0.083518    0.337580    0.128433    11.00000    0.01494    0.02157 =
         0.02832   -0.01297   -0.00350   -0.00333
C3    1    0.122275    0.387313    0.070230    11.00000    0.01250    0.02008 =
         0.03044   -0.01040   -0.00325   -0.00295
C4    1    0.100190    0.353748    0.022995    11.00000    0.01633    0.02008 =
         0.02420   -0.00826   -0.00408   -0.00567
C5    1    0.112728    0.364297   -0.043703    11.00000    0.01790    0.01944 =
         0.03280   -0.00882   -0.00484   -0.00605
C6    1    0.156771    0.413463   -0.102028    11.00000    0.01673    0.02240 =
         0.03221   -0.00835   -0.00646   -0.00267
C7    1    0.137221    0.382278   -0.149351    11.00000    0.01639    0.02268 =
         0.02905   -0.00344   -0.00408   -0.00592
C8    1    0.080025    0.313082   -0.119436    11.00000    0.02030    0.01966 =
         0.02377   -0.00546   -0.00580   -0.00345
C9    1   -0.010823    0.205966   -0.110769    11.00000    0.01591    0.01817 =
         0.02049   -0.00517   -0.00310   -0.00454
C10   1   -0.062548    0.156439   -0.135048    11.00000    0.01437    0.01938 =
         0.02240   -0.00935   -0.00341   -0.00347
C11   1   -0.111092    0.101848   -0.084499    11.00000    0.01382    0.01999 =
         0.02367   -0.00828   -0.00283   -0.00308
C12   1   -0.088886    0.117280   -0.029185    11.00000    0.01430    0.01398 =
         0.02558   -0.00731   -0.00568   -0.00217
C13   1   -0.108447    0.098761    0.078198    11.00000    0.01616    0.01748 =
         0.02667   -0.00878   -0.00374   -0.00537
C14   1   -0.152662    0.062736    0.142745    11.00000    0.01695    0.01814 =
         0.02259   -0.00705   -0.00190   -0.00338
C15   1   -0.121932    0.104250    0.179884    11.00000    0.01663    0.01916 =
         0.02568   -0.00918   -0.00312   -0.00390
C16   1   -0.058515    0.165131    0.138686    11.00000    0.01867    0.01934 =
         0.02270   -0.00873   -0.00359   -0.00320
N3    3    0.040439    0.267503   -0.146714    11.00000    0.01831    0.02030 =
         0.02551   -0.00611   -0.00501   -0.00656
N5    3   -0.124824    0.077355    0.028976    11.00000    0.01800    0.01745 =
         0.01981   -0.00578   -0.00391   -0.00541
N7    3   -0.014829    0.216334    0.158254    11.00000    0.01840    0.02251 =
         0.02255   -0.01021   -0.00336   -0.00597
C17   1   -0.072332    0.174441   -0.200933    11.00000    0.02237    0.02138 =
         0.02033   -0.00796   -0.00371   -0.00615
C18   1    0.012995    0.189942   -0.251020    11.00000    0.02188    0.02753 =
         0.02661   -0.01040   -0.00267   -0.00808
AFIX  43
H18   2    0.081102    0.185395   -0.242843    11.00000   -1.20000
AFIX   0
C19   1   -0.001132    0.211762   -0.312133    11.00000    0.02716    0.03621 =
         0.02160   -0.00921    0.00194   -0.01187
AFIX  43
H19   2    0.057907    0.221605   -0.345355    11.00000   -1.20000
AFIX   0
C20   1   -0.099804    0.219762   -0.326460    11.00000    0.03338    0.03279 =
         0.02245   -0.00868   -0.00696   -0.00967
C21   1   -0.183864    0.203331   -0.276569    11.00000    0.02546    0.03880 =
         0.02459   -0.00957   -0.00781   -0.00650
AFIX  43
H21   2   -0.251828    0.207475   -0.284834    11.00000   -1.20000
AFIX   0
C22   1   -0.170571    0.181071   -0.215144    11.00000    0.01869    0.03169 =
         0.02135   -0.00790   -0.00113   -0.00705
AFIX  43
H22   2   -0.229499    0.170114   -0.182069    11.00000   -1.20000
AFIX   0
C23   1   -0.113233    0.246648   -0.394561    11.00000    0.04042    0.04813 =
         0.02028   -0.00748   -0.00819   -0.01059
C24   1   -0.077168    0.332942   -0.422964    11.00000    0.05653    0.06285 =
         0.02789    0.00480   -0.01194   -0.02298
AFIX 137
H24A  2   -0.120006    0.373627   -0.398888    11.00000   -1.50000
H24B  2   -0.085381    0.350641   -0.466676    11.00000   -1.50000
H24C  2   -0.003199    0.329397   -0.421379    11.00000   -1.50000
AFIX   0
C25   1   -0.045908    0.182504   -0.431439    11.00000    0.06738    0.07920 =
         0.02985   -0.02551   -0.01219   -0.00343
AFIX 137
H25A  2    0.027742    0.178310   -0.428923    11.00000   -1.50000
H25B  2   -0.052531    0.200133   -0.475433    11.00000   -1.50000
H25C  2   -0.069816    0.127986   -0.413579    11.00000   -1.50000
AFIX   0
C26   1   -0.227487    0.252999   -0.400012    11.00000    0.05305    0.05805 =
         0.02893   -0.00378   -0.01876   -0.01594
AFIX 137
H26A  2   -0.251895    0.198733   -0.381715    11.00000   -1.50000
H26B  2   -0.232283    0.269405   -0.444330    11.00000   -1.50000
H26C  2   -0.271424    0.294925   -0.377481    11.00000   -1.50000
AFIX   0
C27   1   -0.176753    0.040226   -0.084751    11.00000    0.01786    0.01924 =
         0.02238   -0.00747   -0.00564   -0.00567
C28   1   -0.147690   -0.007626   -0.130788    11.00000    0.01770    0.02426 =
         0.02315   -0.00920   -0.00016   -0.00655
AFIX  43
H28   2   -0.083276   -0.002686   -0.160364    11.00000   -1.20000
AFIX   0
C29   1   -0.212005   -0.062205   -0.133667    11.00000    0.02387    0.02365 =
         0.02888   -0.01474   -0.00448   -0.00547
AFIX  43
H29   2   -0.189894   -0.094893   -0.164836    11.00000   -1.20000
AFIX   0
C30   1   -0.308530   -0.070550   -0.092005    11.00000    0.01668    0.02043 =
         0.03047   -0.01011   -0.00490   -0.00617
C31   1   -0.335224   -0.023813   -0.045485    11.00000    0.01894    0.01985 =
         0.02869   -0.00818   -0.00096   -0.00730
AFIX  43
H31   2   -0.399461   -0.029035   -0.015780    11.00000   -1.20000
AFIX   0
C32   1   -0.271021    0.030049   -0.041184    11.00000    0.01989    0.02034 =
         0.02538   -0.01031   -0.00382   -0.00330
AFIX  43
H32   2   -0.291216    0.060203   -0.008442    11.00000   -1.20000
AFIX   0
C33   1   -0.377512   -0.131392   -0.096343    11.00000    0.01933    0.02082 =
         0.03853   -0.01372   -0.00436   -0.00784
C34   1   -0.370765   -0.133587   -0.164953    11.00000    0.03748    0.03857 =
         0.04174   -0.01591   -0.00786   -0.01981
AFIX 137
H34A  2   -0.421268   -0.168004   -0.167103    11.00000   -1.50000
H34B  2   -0.299609   -0.157435   -0.182895    11.00000   -1.50000
H34C  2   -0.387100   -0.076727   -0.188748    11.00000   -1.50000
AFIX   0
C35   1   -0.493256   -0.107395   -0.066736    11.00000    0.02160    0.03765 =
         0.06653   -0.02708   -0.00156   -0.01330
AFIX 137
H35A  2   -0.517460   -0.049836   -0.086276    11.00000   -1.50000
H35B  2   -0.500523   -0.111954   -0.021624    11.00000   -1.50000
H35C  2   -0.535681   -0.145075   -0.073404    11.00000   -1.50000
AFIX   0
C36   1   -0.337653   -0.218215   -0.061314    11.00000    0.03490    0.02325 =
         0.05167   -0.00828   -0.01105   -0.00935
AFIX 137
H36A  2   -0.379277   -0.258850   -0.064562    11.00000   -1.50000
H36B  2   -0.344462   -0.217465   -0.017048    11.00000   -1.50000
H36C  2   -0.263701   -0.233918   -0.079905    11.00000   -1.50000
AFIX   0
C37   1   -0.225033    0.000348    0.159880    11.00000    0.01796    0.01859 =
         0.02266   -0.00554   -0.00563   -0.00440
C38   1   -0.208355   -0.063921    0.127627    11.00000    0.02245    0.02186 =
         0.02577   -0.00760   -0.00473   -0.00511
AFIX  43
H38   2   -0.147473   -0.069142    0.095451    11.00000   -1.20000
AFIX   0
C39   1   -0.279455   -0.120579    0.141797    11.00000    0.02605    0.01738 =
         0.03680   -0.00808   -0.00906   -0.00652
AFIX  43
H39   2   -0.265658   -0.164042    0.119272    11.00000   -1.20000
AFIX   0
C40   1   -0.370048   -0.115182    0.188026    11.00000    0.02049    0.02328 =
         0.03729   -0.00498   -0.00930   -0.00841
C41   1   -0.386835   -0.050035    0.220278    11.00000    0.02137    0.02755 =
         0.03368   -0.00991    0.00329   -0.00873
AFIX  43
H41   2   -0.448197   -0.044368    0.252064    11.00000   -1.20000
AFIX   0
C42   1   -0.315848    0.006029    0.206698    11.00000    0.02457    0.02310 =
         0.02823   -0.00972   -0.00010   -0.00861
AFIX  43
H42   2   -0.329061    0.049073    0.229570    11.00000   -1.20000
AFIX   0
C43   1   -0.452471   -0.173768    0.202688    11.00000    0.02090    0.02404 =
         0.05733   -0.00680   -0.00979   -0.00926
C44   1   -0.413931   -0.246198    0.168383    11.00000    0.03511    0.02959 =
         0.07903   -0.01699   -0.01418   -0.01440
AFIX 137
H44A  2   -0.404414   -0.224332    0.123010    11.00000   -1.50000
H44B  2   -0.465900   -0.284936    0.181566    11.00000   -1.50000
H44C  2   -0.346842   -0.275626    0.178644    11.00000   -1.50000
AFIX   0
C45   1   -0.552369   -0.124136    0.181874    11.00000    0.02512    0.03324 =
         0.10073   -0.00805   -0.02266   -0.01044
AFIX 137
H45A  2   -0.535985   -0.099719    0.136863    11.00000   -1.50000
H45B  2   -0.579928   -0.079499    0.205240    11.00000   -1.50000
H45C  2   -0.605127   -0.161427    0.190196    11.00000   -1.50000
AFIX   0
C46   1   -0.478523   -0.210889    0.273678    11.00000    0.04344    0.03767 =
         0.06645   -0.00093    0.00102   -0.02330
AFIX 137
H46A  2   -0.530331   -0.249067    0.282314    11.00000   -1.50000
H46B  2   -0.507375   -0.165737    0.296414    11.00000   -1.50000
H46C  2   -0.414427   -0.241466    0.287444    11.00000   -1.50000
AFIX   0

rem constraints
EADP C47 C47'
EXYZ C47 C47'

rem restraints
SIMU 0.01 C47 > C56'

PART 1
C47   1   -0.146895    0.093913    0.248666    31.00000    0.02047    0.02670 =
         0.02048   -0.00827   -0.00036   -0.00934
C48   1   -0.144189    0.014589    0.288621    31.00000    0.03047    0.02796 =
         0.02734   -0.00931   -0.00635   -0.00744
AFIX  43
H48   2   -0.124903   -0.033874    0.271188    31.00000   -1.20000
AFIX   0
C49   1   -0.169421    0.006219    0.353393    31.00000    0.03216    0.03786 =
         0.02259   -0.00272   -0.00388   -0.01075
AFIX  43
H49   2   -0.166685   -0.048076    0.379494    31.00000   -1.20000
AFIX   0
C50   1   -0.198749    0.075868    0.381052    31.00000    0.02966    0.04847 =
         0.02364   -0.01315   -0.00246   -0.01282
C51   1   -0.201570    0.153854    0.341305    31.00000    0.02834    0.04055 =
         0.03018   -0.01982   -0.00151   -0.01030
AFIX  43
H51   2   -0.220080    0.202248    0.358819    31.00000   -1.20000
AFIX   0
C52   1   -0.178074    0.163121    0.276601    31.00000    0.02099    0.03089 =
         0.02715   -0.01097   -0.00122   -0.00884
AFIX  43
H52   2   -0.183287    0.217569    0.250802    31.00000   -1.20000
AFIX   0
C53   1   -0.225127    0.063445    0.452826    31.00000    0.04619    0.06454 =
         0.02537   -0.01541   -0.00269   -0.01427
C54   1   -0.310553    0.007005    0.480481    31.00000    0.08685    0.10475 =
         0.03102   -0.02307    0.01917   -0.05561
AFIX 137
H54A  2   -0.284514   -0.048044    0.470277    31.00000   -1.50000
H54B  2   -0.372908    0.031821    0.462732    31.00000   -1.50000
H54C  2   -0.328957    0.001086    0.526150    31.00000   -1.50000
AFIX   0
C55   1   -0.125491    0.023972    0.478508    31.00000    0.07103    0.08714 =
         0.03413   -0.02226   -0.02215    0.00304
AFIX 137
H55A  2   -0.070250    0.059296    0.459039    31.00000   -1.50000
H55B  2   -0.101696   -0.031534    0.468795    31.00000   -1.50000
H55C  2   -0.140944    0.018966    0.524078    31.00000   -1.50000
AFIX   0
C56   1   -0.264928    0.146676    0.474212    31.00000    0.05773    0.07908 =
         0.03021   -0.02899   -0.00166   -0.00305
AFIX 137
H56A  2   -0.283557    0.135979    0.520137    31.00000   -1.50000
H56B  2   -0.326972    0.174566    0.457009    31.00000   -1.50000
H56C  2   -0.209614    0.182511    0.459115    31.00000   -1.50000
AFIX   0

PART 2
SAME C47 > C56
C47'  1   -0.146895    0.093913    0.248666   -31.00000    0.02047    0.02670 =
         0.02048   -0.00827   -0.00036   -0.00934
C48'  1   -0.129853    0.014335    0.286702   -31.00000    0.02534    0.03018 =
         0.02237   -0.00749   -0.00375   -0.00932
AFIX  43
H48'  2   -0.107336   -0.033519    0.268631   -31.00000   -1.20000
AFIX   0
C49'  1   -0.146407    0.006413    0.351400   -31.00000    0.03012    0.03814 =
         0.02481   -0.00727   -0.00504   -0.00947
AFIX  43
H49'  2   -0.126419   -0.046038    0.376937   -31.00000   -1.20000
AFIX   0
C50'  1   -0.191885    0.074335    0.379233   -31.00000    0.03393    0.04774 =
         0.02477   -0.01302   -0.00311   -0.01217
C51'  1   -0.210581    0.151966    0.340059   -31.00000    0.02725    0.04062 =
         0.02726   -0.01352   -0.00115   -0.00989
AFIX  43
H51'  2   -0.253500    0.197083    0.356746   -31.00000   -1.20000
AFIX   0
C52'  1   -0.166103    0.163170    0.276338   -31.00000    0.02368    0.03291 =
         0.02455   -0.01205   -0.00120   -0.00934
AFIX  43
H52'  2   -0.149336    0.216072    0.252420   -31.00000   -1.20000
AFIX   0
C53'  1   -0.213335    0.065761    0.450669   -31.00000    0.04777    0.06405 =
         0.02628   -0.01650   -0.00183   -0.01497
C54'  1   -0.208660   -0.025508    0.484866   -31.00000    0.06669    0.07770 =
         0.02459   -0.01701   -0.00028   -0.01065
AFIX 137
H54D  2   -0.233698   -0.028678    0.530041   -31.00000   -1.50000
H54E  2   -0.136030   -0.053408    0.476862   -31.00000   -1.50000
H54F  2   -0.253249   -0.053083    0.469668   -31.00000   -1.50000
AFIX   0
C55'  1   -0.133409    0.108616    0.466405   -31.00000    0.06708    0.08391 =
         0.02883   -0.01185   -0.00383   -0.00925
AFIX 137
H55D  2   -0.128743    0.163408    0.438140   -31.00000   -1.50000
H55E  2   -0.064385    0.074114    0.461204   -31.00000   -1.50000
H55F  2   -0.156147    0.115644    0.509902   -31.00000   -1.50000
AFIX   0
C56'  1   -0.324847    0.110220    0.472165   -31.00000    0.06907    0.08495 =
         0.03456   -0.01434    0.00439   -0.02217
AFIX 137
H56D  2   -0.341737    0.101258    0.518045   -31.00000   -1.50000
H56E  2   -0.375613    0.087506    0.458054   -31.00000   -1.50000
H56F  2   -0.328087    0.170163    0.454062   -31.00000   -1.50000
AFIX   0

PART 0
C57   1    0.101228    0.336938    0.190621    11.00000    0.02204    0.02485 =
         0.02570   -0.01482   -0.00312   -0.00700
C58   1    0.197434    0.350700    0.197777    11.00000    0.02126    0.03259 =
         0.02737   -0.01308   -0.00233   -0.00860
AFIX  43
H58   2    0.248831    0.368024    0.161506    11.00000   -1.20000
AFIX   0
C59   1    0.219947    0.339728    0.256514    11.00000    0.02534    0.04645 =
         0.03325   -0.01824   -0.00554   -0.01209
AFIX  43
H59   2    0.286718    0.349254    0.259483    11.00000   -1.20000
AFIX   0
C60   1    0.147568    0.315154    0.311292    11.00000    0.03404    0.05263 =
         0.02926   -0.01659   -0.00540   -0.01470
C61   1    0.049524    0.304192    0.303907    11.00000    0.03341    0.05208 =
         0.02631   -0.01657    0.00245   -0.01887
AFIX  43
H61   2   -0.002864    0.289209    0.340235    11.00000   -1.20000
AFIX   0
C62   1    0.026631    0.314485    0.245460    11.00000    0.02357    0.03870 =
         0.03174   -0.01750   -0.00176   -0.01280
AFIX  43
H62   2   -0.040681    0.306210    0.242441    11.00000   -1.20000
AFIX   0
C63   1    0.172148    0.298193    0.376564    11.00000    0.05120    0.07871 =
         0.02746   -0.01097   -0.00927   -0.03017
C64   1    0.283003    0.313423    0.374764    11.00000    0.05955    0.12113 =
         0.03330   -0.01155   -0.01829   -0.03803
AFIX 137
H64A  2    0.295241    0.300837    0.417605    11.00000   -1.50000
H64B  2    0.290336    0.371951    0.355433    11.00000   -1.50000
H64C  2    0.334470    0.277241    0.350101    11.00000   -1.50000
AFIX   0
C65   1    0.094693    0.356218    0.415000    11.00000    0.05991    0.12156 =
         0.03895   -0.03919    0.00186   -0.03845
AFIX 137
H65A  2    0.022852    0.346622    0.418019    11.00000   -1.50000
H65B  2    0.102110    0.414387    0.394430    11.00000   -1.50000
H65C  2    0.109476    0.344836    0.457185    11.00000   -1.50000
AFIX   0
C66   1    0.160892    0.206981    0.408983    11.00000    0.08706    0.09116 =
         0.04731    0.00781   -0.02953   -0.03321
AFIX 137
H66A  2    0.089668    0.196764    0.411080    11.00000   -1.50000
H66B  2    0.173892    0.196229    0.451545    11.00000   -1.50000
H66C  2    0.211938    0.169776    0.384999    11.00000   -1.50000
AFIX   0
C67   1    0.177767    0.459242    0.062612    11.00000    0.01809    0.01908 =
         0.02770   -0.00963   -0.00387   -0.00576
C68   1    0.280085    0.461636    0.029865    11.00000    0.01970    0.01912 =
         0.02757   -0.01176   -0.00362   -0.00270
AFIX  43
H68   2    0.312481    0.421659    0.004901    11.00000   -1.20000
AFIX   0
C69   1    0.336358    0.522432    0.033167    11.00000    0.01634    0.02179 =
         0.02728   -0.00917   -0.00165   -0.00638
AFIX  43
H69   2    0.406839    0.522791    0.010485    11.00000   -1.20000
AFIX   0
C70   1    0.291716    0.582512    0.068873    11.00000    0.01799    0.02016 =
         0.03093   -0.01064   -0.00449   -0.00507
C71   1    0.185870    0.582766    0.098045    11.00000    0.02131    0.02150 =
         0.04307   -0.01908    0.00118   -0.00345
AFIX  43
H71   2    0.151429    0.625536    0.120057    11.00000   -1.20000
AFIX   0
C72   1    0.129992    0.522079    0.095608    11.00000    0.01571    0.02473 =
         0.03954   -0.01502    0.00129   -0.00519
AFIX  43
H72   2    0.058459    0.523192    0.116583    11.00000   -1.20000
AFIX   0
C73   1    0.353608    0.644963    0.078694    11.00000    0.02220    0.02307 =
         0.03894   -0.01783    0.00061   -0.00987
C74   1    0.470204    0.628344    0.050821    11.00000    0.02233    0.03584 =
         0.05191   -0.02509   -0.00013   -0.01301
AFIX 137
H74A  2    0.480427    0.633224    0.005464    11.00000   -1.50000
H74B  2    0.498894    0.571924    0.070140    11.00000   -1.50000
H74C  2    0.506489    0.669166    0.058883    11.00000   -1.50000
AFIX   0
C75   1    0.309637    0.733261    0.049449    11.00000    0.03625    0.02259 =
         0.07667   -0.01525   -0.00894   -0.00933
AFIX 137
H75A  2    0.348362    0.773245    0.056511    11.00000   -1.50000
H75B  2    0.235179    0.744989    0.068761    11.00000   -1.50000
H75C  2    0.317083    0.738347    0.004262    11.00000   -1.50000
AFIX   0
C76   1    0.341367    0.637695    0.149744    11.00000    0.03580    0.05891 =
         0.04890   -0.03537   -0.00064   -0.01717
AFIX 137
H76A  2    0.382787    0.675913    0.156666    11.00000   -1.50000
H76B  2    0.366328    0.580298    0.169231    11.00000   -1.50000
H76C  2    0.267206    0.652256    0.168494    11.00000   -1.50000
AFIX   0
C77   1    0.220052    0.481854   -0.113901    11.00000    0.02255    0.02052 =
         0.02918   -0.00610   -0.00579   -0.00875
C78   1    0.322561    0.471494   -0.148748    11.00000    0.02439    0.02416 =
         0.04192   -0.01373   -0.00346   -0.00815
AFIX  43
H78   2    0.351195    0.419828   -0.160872    11.00000   -1.20000
AFIX   0
C79   1    0.382967    0.535617   -0.165840    11.00000    0.02107    0.03063 =
         0.04156   -0.01340   -0.00002   -0.01007
AFIX  43
H79   2    0.452762    0.526916   -0.189183    11.00000   -1.20000
AFIX   0
C80   1    0.343599    0.612743   -0.149538    11.00000    0.02355    0.02266 =
         0.03382   -0.00593   -0.00936   -0.00850
C81   1    0.242466    0.622029   -0.114055    11.00000    0.02393    0.02021 =
         0.04473   -0.01008   -0.00865   -0.00618
AFIX  43
H81   2    0.214362    0.673466   -0.101455    11.00000   -1.20000
AFIX   0
C82   1    0.181035    0.558167   -0.096400    11.00000    0.01892    0.02396 =
         0.03891   -0.01045   -0.00420   -0.00484
AFIX  43
H82   2    0.111858    0.566596   -0.072195    11.00000   -1.20000
AFIX   0
C83   1    0.415241    0.680756   -0.170174    11.00000    0.02503    0.02379 =
         0.04432   -0.00524   -0.00869   -0.01117
C84   1    0.449176    0.700825   -0.241985    11.00000    0.04512    0.04341 =
         0.04968    0.00461   -0.00885   -0.02250
AFIX 137
H84A  2    0.386942    0.721144   -0.260602    11.00000   -1.50000
H84B  2    0.486758    0.650255   -0.256379    11.00000   -1.50000
H84C  2    0.495485    0.743884   -0.254807    11.00000   -1.50000
AFIX   0
C85   1    0.360401    0.760498   -0.148608    11.00000    0.03042    0.02374 =
         0.07832   -0.01135   -0.01203   -0.01111
AFIX 137
H85A  2    0.296771    0.780928   -0.165844    11.00000   -1.50000
H85B  2    0.407712    0.802899   -0.163400    11.00000   -1.50000
H85C  2    0.341367    0.749071   -0.102679    11.00000   -1.50000
AFIX   0
C86   1    0.513181    0.648432   -0.141883    11.00000    0.02627    0.03331 =
         0.06337   -0.00961   -0.01771   -0.00989
AFIX 137
H86A  2    0.559119    0.691716   -0.154236    11.00000   -1.50000
H86B  2    0.550854    0.598557   -0.157257    11.00000   -1.50000
H86C  2    0.492281    0.634325   -0.096040    11.00000   -1.50000
AFIX   0
C87   1    0.166221    0.409813   -0.218298    11.00000    0.01944    0.02574 =
         0.03121   -0.00207   -0.00544   -0.00961
C88   1    0.193323    0.352380   -0.257034    11.00000    0.02375    0.03124 =
         0.03048   -0.00306   -0.00608   -0.01063
AFIX  43
H88   2    0.193726    0.294644   -0.238707    11.00000   -1.20000
AFIX   0
C89   1    0.219762    0.377443   -0.321769    11.00000    0.02873    0.04252 =
         0.02785   -0.00540   -0.00290   -0.01099
AFIX  43
H89   2    0.237893    0.336549   -0.346818    11.00000   -1.20000
AFIX   0
C90   1    0.220280    0.462101   -0.351073    11.00000    0.03550    0.04517 =
         0.02885   -0.00179   -0.00577   -0.01688
C91   1    0.192978    0.519146   -0.312426    11.00000    0.04091    0.03613 =
         0.03494    0.00660   -0.01105   -0.01655
AFIX  43
H91   2    0.192397    0.576865   -0.330859    11.00000   -1.20000
AFIX   0
C92   1    0.166355    0.494558   -0.247412    11.00000    0.03218    0.02736 =
         0.03582   -0.00383   -0.00644   -0.01025
AFIX  43
H92   2    0.148066    0.535539   -0.222433    11.00000   -1.20000
AFIX   0
C93   1    0.248947    0.486325   -0.422748    11.00000    0.05418    0.06336 =
         0.03056    0.00237   -0.00700   -0.02716
C94   1    0.167398    0.460656   -0.450194    11.00000    0.08520    0.08053 =
         0.03258    0.00048   -0.01868   -0.03792
AFIX 137
H94A  2    0.186674    0.474185   -0.496113    11.00000   -1.50000
H94B  2    0.097906    0.490952   -0.436292    11.00000   -1.50000
H94C  2    0.165695    0.400487   -0.435651    11.00000   -1.50000
AFIX   0
C95   1    0.251077    0.579996   -0.446436    11.00000    0.07149    0.07702 =
         0.04132    0.01680   -0.01876   -0.03689
AFIX 137
H95A  2    0.272614    0.592414   -0.492277    11.00000   -1.50000
H95B  2    0.301117    0.597513   -0.428223    11.00000   -1.50000
H95C  2    0.180867    0.610189   -0.434015    11.00000   -1.50000
AFIX   0
C96   1    0.358098    0.440083   -0.447064    11.00000    0.06216    0.09501 =
         0.03346   -0.00612    0.00461   -0.02977
AFIX 137
H96A  2    0.358073    0.379751   -0.432353    11.00000   -1.50000
H96B  2    0.411341    0.457368   -0.431245    11.00000   -1.50000
H96C  2    0.374198    0.453762   -0.493037    11.00000   -1.50000
AFIX   0

rem lattice solvent molecules
PART 0
C1S   1    0.113407    0.045711    0.307505    41.00000    0.07552    0.16598 =
         0.06354   -0.02854    0.01065   -0.02852
AFIX 137
H1S1  2    0.099210    0.014769    0.279362    41.00000   -1.50000
H1S2  2    0.111338    0.104910    0.287093    41.00000   -1.50000
H1S3  2    0.060055    0.039556    0.346465    41.00000   -1.50000
AFIX   0
C2S   1    0.214714    0.013547    0.321468    41.00000    0.08191    0.12894 =
         0.05827   -0.03385    0.00809   -0.04986
N1S   3    0.296648   -0.015134    0.333214    41.00000    0.11128    0.11780 =
         0.08499   -0.03451   -0.00251   -0.03866

C3S   1   -0.074691    0.434508   -0.271966    51.00000    0.04265    0.07637 =
         0.05196   -0.01028   -0.00596   -0.00930
AFIX 137
H3S1  2   -0.073247    0.476207   -0.248359    51.00000   -1.50000
H3S2  2   -0.019002    0.439778   -0.309844    51.00000   -1.50000
H3S3  2   -0.063485    0.378476   -0.245795    51.00000   -1.50000
AFIX   0
C4S   1   -0.174491    0.447745   -0.289345    51.00000    0.04514    0.06816 =
         0.05024   -0.01155   -0.00500   -0.01547
N2S   3   -0.253896    0.458192   -0.303594    51.00000    0.05826    0.09759 =
         0.08062   -0.00539   -0.01977   -0.02234

HKLF      4

REM    xs0247a
REM R1 =  0.0580 for   12850 Fo > 4sig(Fo)  and  0.0878 for all   18021 data
REM   1120 parameters refined using    357 restraints

END

WGHT      0.0655      1.4994

REM Instructions for potential hydrogen bonds

REM No hydrogen bonds found for HTAB generation

REM Highest difference peak  0.409,  deepest hole -0.505,  1-sigma level  0.051
Q1    1   0.1373  0.4046 -0.0259  11.00000  0.05    0.41
Q2    1   0.0355  0.2461  0.0417  11.00000  0.05    0.39
Q3    1   0.2853  0.0554  0.3211  11.00000  0.05    0.37
Q4    1  -0.0466  0.2196 -0.0109  11.00000  0.05    0.32
Q5    1   0.0440  0.2264 -0.0410  11.00000  0.05    0.31
Q6    1   0.1118  0.2636  0.4239  11.00000  0.05    0.29
Q7    1   0.2317  0.4862 -0.1647  11.00000  0.05    0.29
Q8    1   0.2370  0.6028 -0.1501  11.00000  0.05    0.27
Q9    1   0.0510  0.2135 -0.0505  11.00000  0.05    0.27
Q10   1   0.1642  0.5367 -0.1343  11.00000  0.05    0.27
;
_shelx_res_checksum   35190

_shelx_hkl_file
;
   0   0   2 3501.98 146.756  31
   0   0   2 3680.62 172.077  30
   0   0   2 3681.41 134.239   6
   0   0  -2 3672.03 133.225  32
   0   0  -2 3469.08 112.943   1
   0   0   2 3426.31 121.882  35
   0   0  -2 3344.50 127.532   5
   0   0   3 2241.01 176.453  30
   0   0  -3 2297.25 131.736  32
   0   0  -3 2219.54 131.930   5
   0   0   3 2367.57 133.000   6
   0   0   3 2044.97 117.881  35
   0   0  -3 2298.38 114.341   1
   0   0  -3 2156.43 156.792  34
   0   0   3 2554.55 104.486   8
   0   0   3 2224.82 148.143  31
   0   0   4 33759.9 702.277   6
   0   0   4 32796.4 623.303   8
   0   0   4 31655.4 677.227  35
   0   0   4 33015.3 764.641  31
   0   0   4 33653.2 844.740  30
   0   0  -4 32483.9 702.622   5
   0   0  -4 33999.7 711.486  32
   0   0  -4 32304.4 780.810  34
   0   0  -4 33293.8 654.706   1
   0   0  -5 4832.59 261.067  32
   0   0  -5 4968.74 227.552   1
   0   0  -5 4889.67 263.216   5
   0   0   5 4337.09 192.410   8
   0   0   5 4480.81 233.557  35
   0   0  -5 4310.88 305.507  34
   0   0   5 4215.32 285.377  31
   0   0   5 4037.49 334.851  30
   0   0  -6 1015.46 176.227  34
   0   0  -6 1008.43 118.221   1
   0   0   6 702.469 95.1954   8
   0   0  -6 1022.62 135.793  32
   0   0   6 572.009 158.231  31
   0   0  -6 991.697 149.506   5
   0   0   6 880.590 176.861  30
   0   0   6 674.634 126.746  35
   0   0  -7 29850.9 796.319  32
   0   0   7 29853.9 753.234  35
   0   0  -7 29809.1 801.892   5
   0   0   7 30636.8 1010.65  30
   0   0  -7 29851.6 911.398  34
   0   0   7 29387.0 899.124  31
   0   0  -7 29411.8 693.999   1
   0   0   8 2394.42 208.784  35
   0   0  -8 2685.08 193.091   1
   0   0  -8 2396.23 259.380  34
   0   0   8 2352.27 271.495  31
   0   0   8 2458.08 323.428  30
   0   0  -8 2505.30 239.500  32
   0   0  -8 2620.62 234.802   5
   0   0  -9 334.068 133.688  32
   0   0  -9 278.989 156.155  34
   0   0   9-2.07805 161.868  30
   0   0   9 487.522 181.670  31
   0   0  -9 188.227 131.280   5
   0   0  -9 332.541 102.753   1
   0   0   9 63.3268 104.668  35
   0   0  10 5541.07 329.598  35
   0   0  10 5300.17 446.539  31
   0   0  10 5369.90 517.360  30
   0   0 -10 5149.72 299.651   1
   0   0 -10 4949.45 363.815  32
   0   0 -10 5313.11 380.651   5
   0   0 -10 5512.68 438.673  34
   0   0 -11 541.152 173.374  32
   0   0 -11 489.760 123.714   1
   0   0 -11 480.992 168.424   5
   0   0 -11 617.011 184.445  34
   0   0  11 385.106 190.060  31
   0   0  11 441.616 229.186  30
   0   0  12 1183.24 306.718  30
   0   0 -12 1371.74 183.938   1
   0   0  12 1094.20 252.616  31
   0   0 -12 1566.67 259.762   5
   0   0 -12 1431.55 242.623  32
   0   0 -12 1307.67 248.423  34
   0   0 -13 3687.76 393.313  34
   0   0  13 3375.59 470.494  33
   0   0 -13 3688.20 290.388   1
   0   0  13 3247.73 468.878  30
   0   0 -13 3556.88 366.666  32
   0   0  13 3393.42 434.953  31
   0   0 -13 3726.74 372.853   5
   0   0  14 763.685 308.854  30
   0   0  14 730.426 272.040  33
   0   0  14 708.417 245.912  31
   0   0 -14 649.678 201.414  34
   0   0 -14 767.331 209.599   5
   0   0  15 2481.77 444.860  33
   0   0 -15 2683.44 354.968   5
   0   0  15 2581.01 492.437  30
   0   0  16 1143.94 279.847  33
   0   0  16 1053.48 334.163  30
   0   0 -16 1346.12 273.561   5
   0   0  17 231.196 227.722  33
   0   0 -17 496.223 216.108   5
   0   0  17 351.853 179.075  12
   0   0  17 353.590 156.452  22
   0   0 -17 681.634 197.958  28
   0   0  17 1032.35 371.572  30
   0   0  18-40.3269 272.584  33
   0   0  18 293.762 166.470  12
   0   0  18 428.316 193.022  22
   0   0 -18 522.159 181.037  28
   0   0  18 456.231 305.199  30
   0   0 -18 430.210 248.902   5
   0   0 -19 1900.12 269.938  28
   0   0  19 1959.31 296.817  12
   0   0  19 1829.74 263.949  22
   0   0  20 1318.35 214.441  22
   0   0  20 1786.96 295.955  12
   0   0 -20 1826.23 276.949  28
   0   0  21 671.454 175.163  22
   0   0  21 463.276 177.917  12
   0   0 -21 793.180 200.684  28
   0   0  22 61.2182 152.738  22
   0   0 -22 70.9502 141.042  28
   0   0  22-188.994 161.053  12
   0   0  23 441.250 183.005  12
   0   0 -23 238.217 143.069  28
   0   0  23 408.620 156.617  10
   0   0  23 209.520 130.015  22
   0   0  24 200.543 136.932  10
   0   0 -24 241.500 131.583  28
   0   0  24 84.5239 136.692  12
   0   0  25 533.176 150.407  12
   0   0  25 213.182 96.8263  10
   0   0  26 153.113 106.179  12
   0  -1  26-38.1633 85.3858  12
   0  -1  25 1421.33 181.044  12
   0  -1  24 2036.16 244.458  12
   0   1 -24 1973.55 226.050  28
   0   1 -23 2227.62 259.831  28
   0  -1  23 1657.36 218.511  22
   0  -1  23 2400.55 245.620  10
   0  -1  23 1822.71 264.831  12
   0  -1  22 2248.83 273.760  10
   0  -1  22 2478.90 316.168  12
   0   1 -22 2020.06 278.618  28
   0  -1  22 1747.01 233.924  22
   0   1 -21 2794.45 331.515  28
   0  -1  21 2607.62 337.471  12
   0  -1  21 2651.59 293.899  22
   0   1 -20-53.0819 157.016  28
   0  -1  20 34.7438 167.744  12
   0  -1  20 54.7203 171.410  22
   0  -1  19 181.419 186.722  12
   0   1 -19 148.133 163.812  28
   0  -1  19-14.3606 173.381  22
   0   1 -18 1266.88 244.011  28
   0  -1  18 885.392 221.769  12
   0  -1  18 1040.51 216.058  22
   0   1 -17 3441.04 446.975   5
   0  -1  17 3124.33 318.001  22
   0   1 -17 3553.50 344.920  28
   0  -1  17 3509.21 563.975  33
   0  -1  17 3681.45 373.386  12
   0   1 -16-92.0255 166.489  28
   0   1 -16 203.387 196.815   5
   0  -1  16 203.655 166.861  12
   0  -1  16 150.202 234.508  30
   0  -1  16-211.601 322.356  33
   0   1 -15 7563.08 582.785   5
   0  -1  15 7599.98 757.380  30
   0  -1  15 7239.86 730.586  33
   0  -1  14 10436.5 837.762  30
   0  -1  14 10465.7 831.421  33
   0   1 -14 9363.30 633.663  32
   0   1 -14 10642.1 650.166   5
   0  -1  13 5718.29 581.222  31
   0   1 -13 7145.12 419.471   1
   0  -1  13 7343.61 678.974  30
   0  -1  13 6334.75 633.007  33
   0   1 -13 6521.53 493.984  32
   0   1 -13 6835.27 505.501   5
   0  -1  12 197.118 175.842  30
   0   1 -12 77.5602 101.624   1
   0   1 -12 28.3192 112.792  34
   0   1 -12 172.977 129.701  32
   0  -1  12 118.708 182.549  31
   0   1 -12-150.964 136.852   5
   0  -1  11 323.442 126.250  35
   0   1 -11 414.964 117.502   1
   0  -1  11 481.589 202.569  31
   0   1 -11 525.648 172.333   5
   0   1 -11 472.536 162.913  34
   0   1 -11 416.180 155.974  32
   0  -1  11 428.236 169.453  30
   0   1 -10 504.898 146.978  32
   0  -1  10 492.143 142.550  35
   0  -1  10 529.639 212.136  30
   0  -1  10 534.073 195.474  31
   0   1 -10 523.481 156.656   5
   0   1 -10 541.054 122.581   1
   0   1 -10 496.836 168.312  34
   0  -1   9 6003.19 384.924  35
   0  -1   9 5542.27 450.004  31
   0  -1   9 5652.61 493.796  30
   0   1  -9 5238.85 303.966   1
   0   1  -9 5304.28 376.410  34
   0   1  -9 6001.00 368.799   5
   0   1  -9 5829.65 372.032  32
   0   1  -8 2467.84 224.220   5
   0   1  -8 2616.72 208.692   1
   0   1  -8 2582.18 255.976  34
   0  -1   8 2518.35 292.417  31
   0  -1   8 2621.29 316.644  30
   0   1  -8 2315.43 227.591  32
   0  -1   8 2541.49 248.630  35
   0  -1   7 5207.34 392.068  30
   0   1  -7 4923.43 319.072  34
   0   1  -7 5348.13 301.167  32
   0   1  -7 5283.24 300.883   5
   0  -1   7 5091.24 324.665  35
   0   1  -7 5184.61 277.317   1
   0  -1   7 5444.97 376.492  31
   0  -1   6 28725.5 822.720   6
   0   1  -6 29016.4 738.442  32
   0  -1   6 28435.5 839.876  31
   0  -1   6 28097.2 881.944  30
   0   1  -6 27766.6 682.707   1
   0  -1   6 27990.8 790.819  35
   0   1  -6 27125.7 762.131  34
   0   1  -6 28069.7 725.441   5
   0  -1   5 1457.21 197.463  30
   0   1  -5 1187.29 139.559  32
   0  -1   5 1333.98 175.502  35
   0  -1   5 1582.57 185.160   6
   0   1  -5 1374.96 147.928   5
   0   1  -5 1391.92 142.283   1
   0  -1   5 1537.83 182.156  31
   0   1  -5 1357.48 157.831  34
   0   1  -4 7670.59 298.912  34
   0  -1   4 7904.75 341.482  35
   0   1  -4 8053.15 297.221   1
   0  -1   4 7759.28 282.554   3
   0  -1   4 7671.00 368.841  30
   0  -1   4 7119.70 338.404  31
   0  -1   4 7826.14 356.833   6
   0   1  -4 7691.46 287.318   5
   0   1  -4 8217.64 300.744  32
   0  -1   3 839.759 120.655  30
   0   1  -3 572.571 84.0508  34
   0  -1   3 673.630 84.9595   3
   0   1  -3 678.617 95.7349   1
   0  -1   3 643.618 110.549  35
   0   1  -3 791.155 88.4051  32
   0  -1   3 748.744 125.824   6
   0  -1   3 857.644 119.706  31
   0   1  -2 2612.17 104.142  34
   0   1  -2 2633.01 107.889   4
   0  -1   2 2565.41 137.766  30
   0  -1   2 2409.58 123.532   3
   0   1  -2 2883.80 129.968  32
   0  -1   2 2751.72 148.063  31
   0   1  -2 2545.49 135.140   1
   0   1  -1 242.353 25.2738   4
   0  -1   1 185.048 35.4359   3
   0  -1   1 184.431 42.5695  31
   0   1  -1 243.950 40.6290  32
   0  -1  -1 700.762 48.1304   5
   0  -1  -1 707.397 49.5046   2
   0   1   1 592.360 40.7758  31
   0  -1  -1 653.533 35.0398   3
   0   1   1 639.176 61.1502  30
   0  -1  -2 76.8737 41.5569   5
   0   1   2 5.97158 34.2518  31
   0   1   2 46.7154 63.6536  30
   0  -1  -2 54.5104 30.4437   1
   0  -1  -3 8969.91 215.273   1
   0  -1  -3 8837.24 259.619  32
   0   1   3 8666.18 277.043  31
   0  -1  -3 8075.14 266.412   5
   0   1   3 8445.50 355.122  30
   0   1   4 1082.78 172.445  30
   0  -1  -4 867.185 119.325   5
   0   1   4 923.990 95.0267   8
   0   1   4 855.923 119.975  31
   0  -1  -4 908.376 80.8529   1
   0   1   4 686.225 60.7176  35
   0  -1  -4 846.655 105.816  32
   0  -1  -5 13627.9 451.421   5
   0  -1  -5 14421.1 566.317  34
   0  -1  -5 14029.7 361.151   1
   0   1   5 14480.7 336.864  35
   0   1   5 14385.3 380.368   8
   0   1   5 15373.3 607.948  30
   0  -1  -5 14064.9 441.912  32
   0   1   5 13885.4 482.555  31
   0   1   6 12242.8 334.049  35
   0   1   6 12291.8 368.774   8
   0  -1  -6 13447.8 454.253  32
   0   1   6 13078.9 494.195  31
   0   1   6 13125.7 611.378  30
   0  -1  -6 12724.3 575.978  34
   0  -1  -6 12814.9 456.586   5
   0  -1  -7 2341.32 209.778  32
   0   1   7 2433.28 312.062  30
   0  -1  -7 2407.34 225.049   5
   0   1   7 2534.95 173.326   8
   0   1   7 2610.33 155.023  35
   0  -1  -7 2681.18 185.709   1
   0   1   7 2318.88 232.513  31
   0  -1  -7 2525.99 271.250  34
   0   1   8 1326.65 197.373  31
   0  -1  -8 1226.48 177.961   5
   0  -1  -8 1451.17 153.961   1
   0   1   8 1193.11 122.759  35
   0   1   8 1278.90 142.325   8
   0  -1  -8 1329.12 236.362  34
   0   1   8 1120.80 243.248  30
   0  -1  -8 1407.07 188.940  32
   0  -1  -9 6560.67 473.755  34
   0  -1  -9 6433.14 398.551   5
   0   1   9 6295.21 303.869   8
   0   1   9 6159.97 272.964  35
   0  -1  -9 6489.26 310.422   1
   0   1   9 6763.04 440.193  31
   0  -1  -9 6554.41 392.219  32
   0   1   9 6775.31 540.486  30
   0   1  10 7372.07 606.616  30
   0  -1 -10 7357.44 520.853  34
   0  -1 -10 7571.16 453.768   5
   0   1  10 7708.61 504.874  31
   0  -1 -10 6886.75 447.363  32
   0  -1 -10 7485.03 354.602   1
   0  -1 -11 406.315 168.316  34
   0  -1 -11 511.542 156.518   5
   0   1  11 390.412 244.232  30
   0  -1 -11 661.777 171.772  32
   0  -1 -11 719.781 131.198   1
   0   1  11 656.940 188.151  31
   0  -1 -12 788.929 208.443   5
   0   1  12 682.698 250.882  30
   0   1  12 780.653 217.988  31
   0  -1 -12 767.582 222.420  34
   0  -1 -12 643.708 138.998   1
   0  -1 -13 2077.18 334.419  34
   0   1  13 1695.97 332.812  31
   0   1  13 1964.06 385.513  30
   0  -1 -13 2153.22 307.111   5
   0  -1 -14 2456.67 348.617  34
   0   1  14 2468.06 414.116  33
   0   1  14 2427.74 373.267  31
   0  -1 -14 2972.42 377.993   5
   0   1  14 2785.79 468.796  30
   0  -1 -15 1391.70 297.927   5
   0   1  15 1041.09 274.609  33
   0   1  15 1400.74 374.165  30
   0  -1 -15 1305.79 319.310  34
   0   1  15 1005.01 273.581  31
   0   1  16 1823.39 394.749  33
   0   1  16 1557.29 383.097  30
   0  -1 -16 1910.07 323.063   5
   0   1  17 4243.61 575.035  33
   0  -1 -17 4604.35 494.467   5
   0   1  17 4665.07 418.243  12
   0   1  17 4088.96 613.876  30
   0  -1 -17 4341.40 359.299  28
   0  -1 -18 6834.61 469.014  28
   0   1  18 6896.58 501.559  12
   0   1  18 7550.95 828.799  30
   0   1  18 6219.27 412.765  22
   0  -1 -18 6857.82 612.566   5
   0   1  18 6860.85 721.169  33
   0   1  19 1922.10 252.737  22
   0   1  19 1945.23 311.002  12
   0  -1 -19 2130.44 291.258  28
   0   1  20 3363.26 380.814  12
   0  -1 -20 3804.23 361.515  28
   0   1  20 2732.90 304.618  22
   0  -1 -21 112.384 146.887  28
   0   1  21 269.354 168.484  12
   0   1  22 158.109 177.774  12
   0  -1 -22 41.6539 144.331  28
   0   1  23 2321.08 308.039  12
   0  -1 -23 2539.59 289.070  28
   0   1  24 148.541 132.950  10
   0  -1 -24 388.320 137.729  28
   0   1  24 495.917 181.007  12
   0   1  25 71.1649 130.163  12
   0   1  25 31.8819 101.027  10
   0   1  26-3.08747 103.590  12
   0   1  26-45.8890 75.3394  10
   0  -2  25 151.109 106.382  12
   0   2 -24 246.799 122.070  28
   0  -2  24 53.2624 119.830  12
   0  -2  23 355.121 159.462  12
   0   2 -23 593.386 175.047  28
   0  -2  22 14.5314 165.979  12
   0   2 -22 152.686 147.204  28
   0  -2  22-75.3269 138.452  22
   0  -2  21-169.558 137.864  10
   0   2 -21 67.1735 142.610  28
   0  -2  21 266.730 184.969  22
   0  -2  21-134.107 161.572  12
   0  -2  20 24.8437 146.432  22
   0  -2  20-13.8730 173.648  12
   0   2 -20 118.254 167.981  28
   0   2 -19 988.607 246.304  28
   0  -2  19 1397.30 272.060  12
   0  -2  19 1030.45 237.476  22
   0  -2  18 1259.66 249.458  12
   0   2 -18 1647.45 261.199  28
   0  -2  18 921.251 220.991  22
   0  -2  17 5718.59 430.085  22
   0   2 -17 6940.98 570.259   5
   0   2 -17 6418.36 457.041  28
   0  -2  17 7641.00 794.517  33
   0  -2  17 6440.98 475.769  12
   0  -2  16 4935.16 393.049  12
   0   2 -16 4898.18 392.649  28
   0  -2  16 4826.14 644.937  33
   0  -2  16 4635.24 366.197  22
   0   2 -16 4810.97 479.153   5
   0  -2  15 616.070 215.676  33
   0   2 -15 1008.68 254.319   5
   0   2 -15 529.285 196.001  32
   0  -2  14 142.962 190.134  33
   0  -2  14 26.7701 159.604  30
   0   2 -14 301.932 168.309   5
   0   2 -14 352.894 148.049   1
   0   2 -14 187.956 141.681  32
   0   2 -13-92.6556 122.509   5
   0  -2  13-55.4266 199.803  30
   0   2 -13-81.8283 125.385  32
   0   2 -13-26.3220 106.105   1
   0  -2  13-97.6067 240.802  33
   0   2 -12 6708.56 473.335  32
   0   2 -12 7460.24 484.693   5
   0  -2  12 7630.97 666.550  33
   0   2 -12 6927.62 414.207   1
   0  -2  12 7311.85 622.024  30
   0  -2  11 4250.04 392.637  35
   0   2 -11 4412.17 354.531   5
   0  -2  11 3936.25 461.627  30
   0   2 -11 4146.83 364.712  32
   0  -2  11 3915.54 433.064  31
   0  -2  11 4243.76 499.012  33
   0   2 -11 4351.00 318.042   1
   0   2 -10 8150.89 452.513   5
   0   2 -10 7927.99 417.248   1
   0  -2  10 8202.70 582.029  30
   0  -2  10 8037.33 530.479  35
   0   2 -10 6882.41 401.735  34
   0  -2  10 7684.56 569.842  31
   0   2 -10 8320.75 472.948  32
   0  -2   9 5856.73 477.091  30
   0   2  -9 4908.52 352.056  32
   0  -2   9 5576.22 454.856  31
   0  -2   9 5244.63 404.403  35
   0   2  -9 4679.02 317.684  34
   0   2  -9 5015.16 318.277   1
   0   2  -9 5254.95 350.197   5
   0   2  -8 5548.46 338.617  32
   0   2  -8 5257.32 323.567   5
   0  -2   8 5330.05 421.858  30
   0  -2   8 5868.32 422.608  35
   0  -2   8 5283.77 413.783  31
   0   2  -8 5293.10 310.475  34
   0   2  -8 5345.40 316.958   1
   0   2  -7 5211.22 313.373  32
   0  -2   7 5332.45 392.080  30
   0  -2   7 5688.92 401.266  31
   0   2  -7 5090.45 306.683   1
   0   2  -7 4985.30 294.237   5
   0  -2   7 5287.25 387.533  35
   0   2  -7 4806.37 273.908  34
   0  -2   7 5274.76 394.233   6
   0  -2   6 2708.06 251.281  30
   0   2  -6 2227.12 172.868  34
   0  -2   6 2385.05 252.553  31
   0  -2   6 2641.60 282.649   6
   0   2  -6 2303.27 198.358  32
   0   2  -6 2255.51 205.617   1
   0   2  -6 2220.20 194.472   5
   0  -2   6 3038.70 282.054  35
   0   2  -5 22595.8 596.409   5
   0  -2   5 23516.9 788.529   6
   0  -2   5 22472.1 739.502  35
   0   2  -5 22124.4 554.361  34
   0   2  -5 22976.7 650.235   1
   0  -2   5 22325.2 627.483   3
   0  -2   5 22708.6 695.200  30
   0   2  -5 24587.7 643.466  32
   0  -2   5 23837.7 731.008  31
   0   2  -4 14575.7 434.595  32
   0   2  -4 13038.4 442.832   1
   0  -2   4 13460.4 426.763   3
   0   2  -4 12746.8 338.315  34
   0  -2   4 13563.1 548.551   6
   0  -2   4 13536.7 495.066  31
   0  -2   4 13708.9 455.862  30
   0  -2   4 13505.5 528.837  35
   0   2  -3 11146.3 378.513   1
   0   2  -3 11255.8 354.952  32
   0  -2   3 11659.0 413.479  31
   0  -2   3 12109.8 489.895   6
   0  -2   3 11807.2 353.558  30
   0  -2   3 10822.4 453.021  35
   0  -2   3 12264.7 367.996   3
   0   2  -2 145.513 65.0585  32
   0  -2   2 305.231 84.6559  31
   0  -2   2 284.416 54.9914  30
   0   2  -2 215.756 42.2498   4
   0  -2   2 308.722 80.2268   3
   0   2  -1 6968.27 245.596  32
   0  -2   1 6949.24 239.010  33
   0  -2   1 6751.78 228.012   3
   0  -2   0 422.157 65.2179   3
   0  -2   0 434.473 51.5682  33
   0  -2   0 421.309 50.7497  34
   0  -2   0 437.936 40.6690   2
   0  -2  -1 1472.84 83.2070   2
   0  -2  -1 1596.76 82.6651   3
   0  -2  -1 1564.41 116.844  34
   0  -2  -1 1666.65 127.091  35
   0  -2  -1 1467.82 84.8129   5
   0  -2  -2 1226.30 102.453  35
   0  -2  -2 1070.39 87.1926   2
   0  -2  -2 1014.23 86.5324   5
   0   2   2 1207.69 124.858  30
   0   2   2 1023.29 77.4550  31
   0  -2  -2 1114.06 68.0773   3
   0   2   3 17391.7 408.650  36
   0   2   3 16530.8 400.810  31
   0  -2  -3 16467.5 392.013   1
   0  -2  -3 16609.5 411.701   5
   0  -2  -3 15310.4 338.671   6
   0   2   3 16723.1 528.431  30
   0  -2  -3 16223.7 434.535   2
   0   2   4 51585.2 1011.32  31
   0   2   4 52123.0 1201.57  30
   0  -2  -4 52218.6 944.328   1
   0   2   4 51412.9 968.214  36
   0  -2  -4 52783.9 1013.60   5
   0  -2  -5 74820.7 1312.44   1
   0   2   5 72423.9 1337.78   8
   0  -2  -5 79939.3 1441.51   5
   0   2   5 76532.2 1446.17  31
   0   2   5 77618.5 1687.39  30
   0  -2  -6 15553.9 652.962  34
   0   2   6 15426.6 674.096  30
   0   2   6 14403.6 517.136  31
   0  -2  -6 15707.7 505.501   5
   0  -2  -6 15588.9 416.117   1
   0   2   6 14401.9 429.014   8
   0   2   7 31816.1 752.803   8
   0  -2  -7 32050.3 1055.52  34
   0   2   7 32555.9 1103.56  30
   0   2   7 33212.7 888.368  31
   0  -2  -7 33560.3 724.851   1
   0  -2  -7 32707.6 859.577   5
   0   2   8 2060.27 176.755   8
   0   2   8 2289.17 248.141  31
   0  -2  -8 2626.46 332.414  34
   0  -2  -8 2291.74 240.585   5
   0   2   8 2534.56 353.632  30
   0  -2  -8 2281.15 180.577   1
   0   2   9 1453.00 166.610   8
   0  -2  -9 1739.89 169.755   1
   0   2   9 1445.03 288.175  30
   0  -2  -9 1644.63 272.097  34
   0   2   9 1433.51 220.100  31
   0  -2  -9 1561.65 213.651   5
   0  -2 -10 1307.77 218.110   5
   0  -2 -10 1460.35 267.541  34
   0   2  10 843.653 237.524  30
   0  -2 -10 1495.46 161.638   1
   0   2  10 994.483 151.380   8
   0   2  10 1155.72 215.964  31
   0  -2 -11 7896.43 593.379  34
   0  -2 -11 7564.70 370.946   1
   0   2  11 8082.06 665.162  30
   0   2  11 6932.93 373.449   8
   0   2  11 7117.86 490.753  31
   0  -2 -11 7473.95 484.689   5
   0  -2 -12 1314.49 248.554   5
   0  -2 -12 1090.08 251.444  34
   0  -2 -12 1073.96 156.833   1
   0   2  12 1392.84 362.206  30
   0   2  12 1008.53 211.329  31
   0   2  13 2272.96 416.739  30
   0   2  13 1857.12 303.814  31
   0  -2 -13 2336.61 372.081  34
   0  -2 -13 2279.39 321.079   5
   0   2  14 4131.69 484.675  33
   0   2  14 4627.53 615.699  30
   0   2  14 4216.76 460.406  31
   0  -2 -14 4375.86 442.309   5
   0  -2 -14 4598.41 509.175  34
   0   2  15 18101.7 1212.02  30
   0   2  15 18485.8 1069.98  33
   0  -2 -15 17028.7 996.641  34
   0  -2 -15 17797.2 911.287   5
   0   2  15 17630.3 986.062  31
   0   2  16 9907.02 757.774  31
   0   2  16 9490.41 916.054  30
   0   2  16 8689.35 776.786  33
   0  -2 -16 9676.01 770.218  34
   0  -2 -16 8997.58 685.031   5
   0  -2 -17 151.578 161.971  34
   0   2  17 312.747 158.326  12
   0   2  17 418.362 308.126  30
   0  -2 -17 469.585 212.573   5
   0   2  17 16.9845 201.771  33
   0  -2 -17 332.231 160.044  28
   0   2  18 4430.40 604.436  33
   0  -2 -18 4134.36 493.109   5
   0   2  18 4458.34 406.920  12
   0   2  18 3776.50 630.272  30
   0  -2 -18 4136.57 347.170  28
   0   2  19 4535.05 432.761  12
   0  -2 -19 4308.88 371.926  28
   0   2  20 1405.24 272.176  12
   0  -2 -20 1568.33 258.190  28
   0  -2 -21 1048.46 218.449  28
   0   2  21 1159.68 246.019  12
   0  -2 -22 186.772 142.808  28
   0   2  22 351.177 184.274  12
   0  -2 -23 317.155 145.922  28
   0   2  23 33.4460 171.096  12
   0   2  24 381.548 190.070  12
   0   2  25 463.823 150.168  12
   0   2  25 81.1580 108.020  10
   0   2  26 369.844 132.510  12
   0   2  26 310.260 112.806  10
   0  -3  25 452.081 109.304  12
   0  -3  24-56.5712 104.266  12
   0   3 -24 54.2096 93.6123  28
   0   3 -23 234.386 135.674  28
   0  -3  23 442.020 157.500  12
   0   3 -22 858.922 189.961  28
   0  -3  22 413.213 159.077  22
   0  -3  22 748.897 184.073  12
   0  -3  21-20.6251 155.984  22
   0   3 -21-154.874 176.613  28
   0  -3  21 230.121 159.314  12
   0   3 -20 732.837 216.189  28
   0  -3  20 1004.96 225.066  12
   0  -3  20 655.811 198.015  22
   0  -3  19 84.2143 165.874  22
   0   3 -19 33.6750 142.756  28
   0  -3  19 176.896 166.932  12
   0  -3  18 1155.09 237.330  22
   0  -3  18 1183.47 236.794  12
   0   3 -18 1228.04 241.516  28
   0  -3  17 600.408 206.513  12
   0   3 -17-17.7373 163.165  28
   0  -3  17 244.504 181.452  22
   0  -3  16 428.105 194.780  22
   0   3 -16 657.336 203.860  28
   0  -3  16 653.465 195.521  12
   0  -3  16 260.919 285.124  33
   0   3 -15 1564.39 249.739  28
   0  -3  15 1345.16 225.256  22
   0   3 -15 1226.87 280.668  32
   0   3 -15 1577.99 280.781   5
   0  -3  15 1824.74 231.276  15
   0  -3  15 2220.95 473.538  33
   0  -3  14 3126.77 489.788  33
   0   3 -14 3463.65 329.916   1
   0   3 -14 3779.31 377.389   5
   0   3 -14 2966.74 379.171  32
   0  -3  13 48.0238 186.229  33
   0   3 -13-43.1942 121.121  32
   0   3 -13 67.0415 113.351   1
   0   3 -13 36.8819 135.915   5
   0   3 -12 5630.65 421.045   5
   0  -3  12 5644.95 525.182  30
   0   3 -12 5705.16 399.194   1
   0  -3  12 5294.79 497.678  35
   0  -3  12 5409.35 587.875  33
   0   3 -12 5533.86 440.017  32
   0  -3  11 10600.6 674.590  35
   0   3 -11 11012.0 599.976  32
   0   3 -11 11459.7 577.679   5
   0  -3  11 11189.6 698.630  30
   0  -3  11 11079.7 799.315  33
   0   3 -11 11613.3 566.731   1
   0  -3  10 11722.8 675.456  30
   0  -3  10 11555.7 754.167  33
   0   3 -10 11843.3 548.987   1
   0   3 -10 11812.0 581.839  32
   0   3 -10 11769.6 552.771   5
   0  -3  10 10605.8 663.641  35
   0  -3   9 5974.15 488.794  35
   0  -3   9 6049.74 456.344  30
   0   3  -9 6198.08 386.511   1
   0   3  -9 6379.84 384.085   5
   0   3  -9 5850.63 395.588  32
   0  -3   9 5666.32 510.870  33
   0   3  -8 1709.51 215.996   1
   0  -3   8 1958.51 286.919  31
   0  -3   8 2000.58 253.080  30
   0  -3   8 2472.35 314.582  35
   0   3  -8 2120.91 229.757  32
   0   3  -8 1956.20 208.974   5
   0   3  -7 2892.66 166.450  34
   0  -3   7 3530.16 372.890   6
   0  -3   7 3982.34 322.197  30
   0   3  -7 3717.59 278.787  32
   0  -3   7 3663.29 351.190  31
   0   3  -7 3430.27 244.027   5
   0  -3   7 4218.45 386.085  35
   0   3  -7 3658.81 295.604   1
   0   3  -6 333.832 59.9949  34
   0   3  -6 614.253 141.701  32
   0  -3   6 454.056 118.645   3
   0  -3   6 499.385 122.852  30
   0   3  -6 545.612 141.084   1
   0  -3   6 469.317 155.081  31
   0  -3   6 330.029 178.816  35
   0  -3   6 595.893 206.621   6
   0   3  -6 512.626 105.823   5
   0   3  -5 1361.57 184.856   1
   0   3  -5 1286.92 168.547  32
   0  -3   5 1243.44 212.655  35
   0  -3   5 1098.73 183.943  31
   0  -3   5 1476.03 173.116   3
   0  -3   5 1138.86 139.718  30
   0  -3   5 1176.35 211.373   6
   0   3  -4 18267.9 544.564  32
   0  -3   4 18281.6 714.966   6
   0   3  -4 17154.3 572.106   1
   0  -3   4 17370.3 688.025  35
   0  -3   4 18581.3 551.044   3
   0  -3   4 17330.7 495.408  30
   0  -3   3 2912.20 203.127   3
   0   3  -3 2842.27 190.770  32
   0  -3   3 2929.01 151.505  30
   0  -3   3 3027.36 288.765  35
   0   3  -2 18163.9 348.889   4
   0   3  -2 18114.5 512.146  32
   0  -3   2 16954.7 521.705  33
   0  -3   2 16830.0 493.373   3
   0  -3   1 305.424 39.4820  34
   0  -3   1 437.357 98.4057  33
   0  -3   1 339.844 97.9402   3
   0   3  -1 137.920 103.498  32
   0  -3   0 1400.76 121.636   3
   0  -3   0 1527.14 108.117  33
   0  -3   0 1432.98 108.445  34
   0   3   0 1534.58 157.953  32
   0  -3   0 1448.70 86.5178   2
   0  -3  -1 4787.57 276.253  35
   0   3   1 4928.76 192.942  30
   0  -3  -1 4677.53 144.918  33
   0  -3  -1 4641.21 180.984   5
   0  -3  -1 4901.64 277.914   6
   0  -3  -1 4829.79 186.789   3
   0  -3  -1 4725.10 174.153   2
   0  -3  -1 4708.34 236.058  34
   0  -3  -2 659.917 120.686   6
   0   3   2 417.028 111.357  30
   0   3   2 295.922 74.3339  31
   0  -3  -2 458.349 81.6061   5
   0  -3  -2 486.191 74.6639   3
   0  -3  -2 531.080 120.936  35
   0  -3  -2 484.299 125.999  34
   0  -3  -2 659.458 89.3645   2
   0   3   3 13830.7 370.497  31
   0   3   3 13885.2 501.225  30
   0  -3  -3 13720.1 412.312   2
   0   3   3 13985.0 423.382  36
   0  -3  -3 14692.3 402.275   5
   0  -3  -3 13789.1 525.518  34
   0  -3  -3 13887.5 332.715   3
   0  -3  -3 13761.4 404.141   6
   0  -3  -3 13984.1 425.247  35
   0  -3  -4 2407.30 121.300   3
   0   3   4 2486.09 250.297  30
   0  -3  -4 2401.66 139.213   6
   0  -3  -4 2771.15 187.522   5
   0   3   4 2810.32 177.092  31
   0   3   4 2771.20 186.276  36
   0  -3  -5 1985.20 179.644   5
   0   3   5 1962.57 166.390  36
   0  -3  -5 2007.05 163.044   1
   0   3   5 2050.18 177.588  31
   0   3   5 2248.13 264.341  30
   0   3   6 65.4188 146.982  30
   0   3   6 67.6650 18.6994  35
   0  -3  -6 100.255 129.563  34
   0  -3  -6 156.317 92.6549   5
   0   3   6-23.6998 101.983  31
   0  -3  -6 84.4998 76.5180   1
   0   3   7 9997.46 386.931   8
   0  -3  -7 9812.47 437.846   5
   0   3   7 9869.81 591.779  30
   0  -3  -7 9535.86 563.115  34
   0  -3  -7 10229.9 360.691   1
   0   3   7 10038.8 434.671  31
   0  -3  -8 354.294 224.554  34
   0  -3  -8 205.945 87.8411   1
   0   3   8 143.443 162.971  30
   0   3   8 212.019 94.7107   8
   0   3   8 135.388 103.665  31
   0  -3  -8 160.499 103.947   5
   0  -3  -9 5643.47 483.982  34
   0  -3  -9 5747.82 383.811   5
   0   3   9 5801.01 321.219   8
   0   3   9 5776.44 388.756  31
   0   3   9 5693.14 517.666  30
   0  -3  -9 5813.91 295.192   1
   0  -3 -10 1565.66 169.699   1
   0   3  10 1608.13 189.421   8
   0   3  10 1450.53 341.121  30
   0  -3 -10 1757.81 308.550  34
   0   3  10 1627.58 228.236  31
   0  -3 -10 1535.60 243.689   5
   0  -3 -11 11204.2 602.466   5
   0   3  11 11184.7 491.541   8
   0   3  11 11063.4 790.143  30
   0  -3 -11 10863.0 731.818  34
   0   3  11 10626.2 602.277  31
   0  -3 -11 10983.6 454.420   1
   0  -3 -12 2492.24 382.250  34
   0   3  12 2618.78 260.398   8
   0   3  12 2473.37 310.339  31
   0  -3 -12 2536.27 320.134   5
   0   3  12 3001.67 454.132  30
   0  -3 -13 730.700 250.348  34
   0  -3 -13 687.189 195.870   5
   0   3  13 358.422 279.810  30
   0   3  13 713.596 220.662  31
   0   3  13 356.553 105.313   8
   0  -3 -14 338.031 207.763  34
   0   3  14-64.3370 211.629  30
   0  -3 -14 354.437 198.622   5
   0   3  14 279.170 178.019  31
   0   3  15 317.023 208.927  33
   0  -3 -15 209.589 175.541  34
   0   3  15 359.780 195.308  31
   0  -3 -15 257.013 170.342   5
   0   3  15 612.286 351.903  30
   0   3  16-160.605 191.396  31
   0  -3 -16-10.4564 163.003   5
   0   3  16-485.572 240.775  30
   0  -3 -16 305.645 243.891  34
   0   3  16 244.281 224.193  33
   0   3  17-13.9464 208.949  33
   0  -3 -17 218.232 188.360   5
   0   3  17-28.1317 163.151  12
   0   3  17 154.863 312.935  30
   0  -3 -17 215.950 230.906  34
   0  -3 -18 1032.46 260.466   5
   0  -3 -18 1362.88 243.349  28
   0   3  18 1344.93 434.032  30
   0   3  18 1046.47 315.010  33
   0  -3 -18 1859.30 371.319  34
   0   3  18 1423.43 255.645  12
   0   3  19 138.935 164.538  12
   0  -3 -19 93.2692 138.337  28
   0   3  20 42.3686 167.866  12
   0  -3 -20 40.4022 139.874  28
   0  -3 -21-121.650 151.219  28
   0   3  21 168.027 192.473  12
   0   3  22-133.760 174.171  12
   0  -3 -22 135.477 131.584  28
   0  -3 -23 113.994 145.052  28
   0   3  23 314.400 175.165  12
   0   3  24 384.093 168.724  12
   0   3  25-231.069 141.138  12
   0   3  26 238.945 120.304  10
   0   3  26-340.730 121.763  12
   0  -4  24-202.855 102.333  12
   0   4 -24-230.224 104.880  28
   0  -4  23-82.6143 110.695  12
   0   4 -23 207.213 124.294  28
   0  -4  22-166.763 126.167  12
   0   4 -22-40.9914 123.541  28
   0  -4  21 196.359 148.141  12
   0  -4  21 155.427 157.183  22
   0   4 -21 20.2446 133.961  28
   0   4 -20 107.735 152.520  28
   0  -4  20 1.84682 166.703  22
   0  -4  20-181.626 155.897  12
   0  -4  19-91.4436 165.274  12
   0   4 -19-74.8337 164.488  28
   0  -4  19 44.7703 168.017  22
   0  -4  18 174.594 174.488  12
   0  -4  18 145.246 204.739  22
   0   4 -18 387.476 175.822  28
   0  -4  17 2363.01 314.493  12
   0  -4  17 1858.65 293.167  22
   0   4 -17 2516.47 320.872  28
   0   4 -16 56.6353 164.324  32
   0  -4  16 586.155 180.479  12
   0  -4  16 92.2056 208.576  22
   0  -4  16 216.918 283.488  33
   0   4 -16 755.735 220.994  28
   0  -4  15 7483.73 474.760  12
   0   4 -15 6746.84 561.459  32
   0  -4  15 7299.56 434.555  15
   0   4 -15 6615.49 463.028  28
   0  -4  15 7416.62 791.546  33
   0  -4  15 7033.38 473.977  22
   0  -4  14-125.729 252.718  33
   0   4 -14 73.6245 140.333  32
   0   4 -14 114.080 119.588   1
   0  -4  13 405.764 259.663  33
   0   4 -13 136.265 117.626  32
   0   4 -13 118.805 135.262   1
   0   4 -13 253.497 140.063   5
   0  -4  12 168.895 192.352  35
   0  -4  12-95.0507 225.972  33
   0   4 -12 133.210 118.311  32
   0   4 -12-221.143 152.387   5
   0   4 -12 222.303 145.997   1
   0  -4  11 31.5760 178.377  35
   0   4 -11 131.963 131.680   1
   0   4 -11 236.338 138.648   5
   0   4 -11 212.983 150.246  32
   0  -4  11 196.087 175.502  33
   0  -4  10 861.787 292.393  33
   0   4 -10 608.748 162.963  32
   0  -4  10 843.802 240.575  35
   0   4 -10 520.600 129.368   5
   0   4 -10 757.492 189.372   1
   0  -4   9 12.0644 173.260  33
   0   4  -9 181.055 129.933   1
   0  -4   9 108.553 106.212  30
   0   4  -9 132.818 116.145  32
   0  -4   9 79.2218 196.100  35
   0   4  -9 91.2414 105.004   5
   0   4  -8 382.541 148.263   1
   0  -4   8 225.156 129.436  30
   0   4  -8 180.960 107.865  32
   0   4  -8 139.369 98.4142   5
   0  -4   8 214.269 194.831  35
   0  -4   8 120.734 157.155  33
   0  -4   7 2514.69 351.150   6
   0   4  -7 2196.74 231.090  32
   0   4  -7 2289.90 199.508   5
   0   4  -7 2553.62 267.397   1
   0  -4   7 2436.96 337.728  33
   0  -4   7 2452.21 332.994  35
   0  -4   7 2261.29 222.135  30
   0   4  -6-74.4100 126.242   1
   0  -4   6 270.509 122.685   3
   0  -4   6 92.9416 156.044  35
   0   4  -6 47.3693 81.6359   5
   0  -4   6 274.480 157.236   6
   0  -4   6 49.2684 87.4292  30
   0  -4   6 78.6310 138.607  33
   0   4  -6 18.5980 99.2110  32
   0   4  -5 104.781 117.592   1
   0  -4   5 109.076 104.337   3
   0  -4   5 299.452 168.583   6
   0   4  -5 139.896 93.2458  32
   0  -4   5 12.4802 173.375  35
   0  -4   5 142.361 138.384  33
   0  -4   5 195.184 72.0226  30
   0  -4   4 2268.28 134.372  30
   0   4  -4 2600.76 230.014   1
   0  -4   4 2636.47 322.733   6
   0   4  -4 2462.20 210.531  32
   0  -4   4 2908.46 326.282  35
   0  -4   4 2171.57 201.941   3
   0  -4   4 2387.65 252.525  33
   0   4  -3 2815.67 212.264  32
   0  -4   3 2917.53 248.223  33
   0  -4   3 2699.29 286.339   6
   0  -4   3 2647.98 214.746   3
   0  -4   3 2556.67 285.013  35
   0  -4   2 5711.02 279.998   3
   0  -4   2 5749.46 294.960  33
   0   4  -2 5131.83 141.122   4
   0   4  -2 5559.86 292.275  32
   0  -4   1 32914.5 616.023   2
   0   4  -1 32883.5 820.699  32
   0  -4   1 31953.4 755.653   3
   0  -4   1 34372.5 749.173  33
   0  -4   1 30443.7 582.484  34
   0  -4   0 1427.69 196.243  35
   0  -4   0 1516.14 216.328   6
   0  -4   0 1684.98 152.868   3
   0  -4   0 1500.62 97.3993   2
   0   4   0 1717.26 187.675  32
   0  -4   0 1586.18 121.612  33
   0  -4   0 1387.66 123.233  34
   0  -4  -1 250572. 3972.30  34
   0   4   1 240176. 3822.47  30
   0  -4  -1 242918. 3862.89   3
   0  -4  -1 251342. 4157.22  35
   0  -4  -1 238906. 4160.36   6
   0  -4  -1 240932. 3747.53  33
   0  -4  -1 244465. 3804.28   2
   0  -4  -2 6945.76 261.557   2
   0   4   2 7471.14 307.212  30
   0  -4  -2 7355.74 273.714   5
   0  -4  -2 6581.93 254.358   3
   0  -4  -2 6939.97 360.754   6
   0  -4  -2 7092.95 353.957  34
   0  -4  -2 7417.93 369.505  35
   0  -4  -3 61354.5 1290.40   6
   0   4   3 63408.8 1288.89  36
   0  -4  -3 60456.5 1108.14   3
   0   4   3 62787.7 1142.95  31
   0   4   3 62138.3 1324.32  30
   0  -4  -3 63345.6 1192.42   5
   0  -4  -3 62599.5 1312.06  35
   0  -4  -3 61527.9 1404.49  34
   0  -4  -3 61982.7 1196.32   2
   0   4   4 4248.17 209.175  31
   0  -4  -4 4323.97 241.175   6
   0  -4  -4 3935.20 175.659   3
   0  -4  -4 4158.75 337.980  34
   0   4   4 4285.88 252.544  36
   0   4   4 3914.23 295.503  30
   0  -4  -4 3878.60 243.574   2
   0  -4  -4 4394.16 234.980   5
   0  -4  -5 12945.1 609.411  34
   0  -4  -5 12702.9 335.823   3
   0  -4  -5 13898.9 460.873   5
   0   4   5 12254.9 410.995  31
   0  -4  -5 13236.3 385.761   6
   0   4   5 12367.3 579.851  30
   0  -4  -5 13363.7 540.317   7
   0   4   5 12860.3 444.698  36
   0  -4  -6 38209.0 1022.18   7
   0  -4  -6 32300.4 669.942   3
   0   4   6 35992.1 1119.93  30
   0  -4  -6 35614.7 880.813   5
   0   4   6 34337.7 837.339  31
   0   4   6 35709.9 846.791  36
   0  -4  -6 34674.4 1113.66  34
   0   4   7 3278.72 239.238  31
   0   4   7 3354.03 357.209  30
   0   4   7 3225.95 228.235  36
   0  -4  -7 3006.42 340.203  34
   0  -4  -7 2980.70 251.901   5
   0  -4  -7 2945.18 146.758   3
   0  -4  -7 3486.49 308.614   7
   0   4   8 2391.99 211.992   8
   0  -4  -8 2311.03 318.113  34
   0  -4  -8 2261.65 241.636   5
   0   4   8 2281.80 223.717  31
   0   4   8 2684.35 359.686  30
   0   4   9 1619.91 201.446   8
   0  -4  -9 1688.92 316.580  34
   0   4   9 1698.00 351.420  30
   0   4   9 1811.57 236.903  31
   0  -4  -9 1929.84 194.314   1
   0  -4  -9 1820.64 245.240   5
   0   4  10 2340.81 383.059  30
   0  -4 -10 2364.44 373.946  34
   0  -4 -10 2373.88 283.166   5
   0   4  10 2226.10 259.834  31
   0  -4 -10 2635.02 222.738   1
   0   4  10 1946.50 214.645   8
   0   4  11 15379.9 609.249   8
   0  -4 -11 16311.9 935.790  34
   0   4  11 15616.6 968.273  30
   0   4  11 15825.3 718.659  31
   0  -4 -11 15925.2 577.617   1
   0  -4 -11 16774.7 752.144   5
   0   4  12 2797.42 442.516  30
   0  -4 -12 3579.35 463.111  34
   0   4  12 2922.97 330.010  31
   0  -4 -12 3066.90 357.307   5
   0   4  12 2788.80 272.720   8
   0   4  13 1071.29 187.506   8
   0  -4 -13 1213.89 305.305  34
   0   4  13 1139.09 323.319  30
   0   4  13 1218.32 238.592  31
   0  -4 -13 1343.01 261.658   5
   0   4  14 39.5881 143.024  31
   0   4  14 21.8793 182.716  33
   0   4  14-243.846 278.343  30
   0  -4 -14 42.7886 203.804  34
   0  -4 -14 263.419 142.742   5
   0   4  14 149.790 119.750   8
   0   4  15 2512.23 393.762  33
   0   4  15 2747.63 529.047  30
   0   4  15 2758.67 380.413  31
   0  -4 -15 2932.42 400.307   5
   0  -4 -15 2697.62 457.154  34
   0   4  16 91.7659 303.033  30
   0  -4 -16 327.700 186.458   5
   0  -4 -16 563.188 306.371  34
   0   4  16 218.252 183.841  31
   0   4  16 37.1358 166.522  33
   0   4  17 703.729 238.986  33
   0  -4 -17 737.874 314.842  34
   0   4  17 1303.57 252.568  12
   0  -4 -17 935.127 284.894   5
   0   4  17 1293.99 420.983  30
   0  -4 -17 892.153 167.867  25
   0   4  18 11070.8 872.656  33
   0  -4 -18 9532.84 857.079  34
   0   4  18 11443.1 625.559  12
   0   4  18 10111.3 1002.24  30
   0  -4 -18 11138.6 542.753  28
   0  -4 -18 10643.4 786.123   5
   0   4  19 6944.38 502.861  12
   0  -4 -19 6605.94 432.294  28
   0  -4 -20 2357.46 275.085  28
   0   4  20 2835.62 351.804  12
   0   4  21-108.977 172.431  12
   0  -4 -21 147.551 137.684  28
   0   4  22-27.4257 181.374  12
   0  -4 -22 22.8454 125.069  28
   0   4  23 483.562 170.394  12
   0   4  24 456.156 176.296  12
   0   4  25 1432.75 224.471  12
   0   4  26 205.863 116.511  10
   0   4  26 389.737 138.160  12
   0  -5  24-72.4037 71.2139  20
   0   5 -23-247.407 115.024  28
   0  -5  23-47.2516 81.7237  12
   0   5 -22 561.236 157.034  28
   0  -5  22 630.456 146.732  12
   0  -5  21-113.360 138.104  12
   0   5 -21 86.3556 120.654  28
   0  -5  20 1005.74 193.622  12
   0   5 -20 1147.23 221.578  28
   0  -5  20 1147.75 251.020  22
   0   5 -19 1945.57 264.300  28
   0  -5  19 1577.00 273.954  22
   0  -5  19 1746.96 261.568  12
   0  -5  18 1214.03 254.405  22
   0  -5  18 1723.11 262.681  12
   0   5 -18 1614.62 261.356  28
   0  -5  17 163.433 147.653  12
   0  -5  17 218.946 177.083  22
   0   5 -17 263.193 179.063  28
   0   5 -16 2088.08 284.227  28
   0  -5  16 1853.26 279.031  22
   0  -5  16 2461.38 304.065  12
   0   5 -15 1591.65 320.234  32
   0  -5  15 1330.34 349.530  33
   0  -5  15 2038.12 263.576  15
   0   5 -15 1645.14 253.891  28
   0  -5  15 1758.68 270.107  22
   0  -5  15 1779.02 240.703  12
   0  -5  14 4544.79 387.134  22
   0  -5  14 5956.51 694.177  33
   0   5 -14 5795.10 406.285  28
   0  -5  14 5802.55 380.878  15
   0   5 -14 4960.25 428.522   1
   0  -5  14 5302.06 388.459  12
   0   5 -14 5662.25 500.895  32
   0   5 -13-65.8247 131.182  32
   0  -5  13 28.5349 209.816  33
   0   5 -13 263.580 171.386   1
   0  -5  12 150.729 201.855  33
   0   5 -12-189.454 150.059  32
   0  -5  12-50.8764 180.755  35
   0   5 -12-171.620 134.180   1
   0  -5  11 425.116 225.267  35
   0  -5  11 373.349 225.823  33
   0   5 -11 61.4918 125.170   1
   0   5 -11 73.4642 122.523  32
   0   5 -10 3799.96 350.931  32
   0  -5  10 4154.17 494.957  35
   0   5 -10 3788.33 356.921   1
   0   5 -10 3993.16 314.482   5
   0  -5  10 3981.53 491.358  33
   0   5  -9 7326.49 395.542   5
   0  -5   9 6387.91 581.072  35
   0   5  -9 7138.86 483.521   1
   0  -5   9 6284.31 571.106  33
   0   5  -9 6882.91 445.898  32
   0   5  -8 286.365 125.246  32
   0  -5   8 471.530 227.906  35
   0   5  -8 387.946 108.781   5
   0   5  -8 588.766 183.304   1
   0  -5   8 448.407 186.915  33
   0  -5   7 10357.2 652.711  33
   0  -5   7 10215.4 727.906   6
   0   5  -7 10496.3 532.051  32
   0   5  -7 11919.5 465.913   5
   0  -5   7 10812.9 711.018  35
   0   5  -7 11389.4 582.093   1
   0   5  -6 15820.6 619.840  32
   0  -5   6 15168.8 817.849  35
   0  -5   6 14952.4 744.789  33
   0   5  -6 16365.9 528.088   5
   0   5  -6 15570.5 676.474   1
   0  -5   6 15385.9 849.350   6
   0  -5   6 14631.2 628.223   3
   0  -5   5 349.849 152.425  33
   0  -5   5 733.449 242.897   6
   0   5  -5 473.594 150.593   1
   0  -5   5 437.002 136.916   3
   0  -5   5 435.053 179.632  35
   0   5  -5 519.128 137.588  32
   0   5  -4 4649.22 344.121   1
   0  -5   4 4174.79 334.335  33
   0  -5   4 4254.66 419.796   6
   0  -5   4 4439.73 305.452   3
   0  -5   4 4176.97 427.217  35
   0   5  -4 4265.42 293.653  32
   0  -5   3 1323.38 247.690  35
   0  -5   3 1223.16 233.826   6
   0  -5   3 1094.63 157.698   3
   0   5  -3 1235.85 174.378  32
   0  -5   3 1080.32 173.456  33
   0   5  -2 11582.1 483.923  32
   0  -5   2 11789.7 460.902  33
   0  -5   2 11221.4 457.400   3
   0  -5   2 12048.0 636.372   6
   0  -5   2 11169.8 614.645  35
   0  -5   1 20960.6 610.088   3
   0  -5   1 20792.5 839.563   6
   0  -5   1 19631.9 423.880  34
   0  -5   1 20965.6 829.084  35
   0  -5   1 20132.6 447.173   2
   0   5  -1 20750.8 666.385  32
   0  -5   1 21207.0 587.297  33
   0  -5   0 15316.9 487.000   3
   0  -5   0 15462.3 434.960  34
   0  -5   0 15948.7 436.711  33
   0  -5   0 14426.2 680.590   6
   0  -5   0 14257.3 371.623   2
   0   5   0 15697.2 574.225  32
   0  -5   0 14890.9 650.233  35
   0  -5  -1 3143.57 304.083  35
   0   5   1 2905.38 154.690  30
   0  -5  -1 2855.56 164.774   2
   0  -5  -1 2607.26 290.911   6
   0  -5  -1 3214.01 222.204  34
   0  -5  -1 3118.27 145.841  33
   0  -5  -1 2993.68 199.742   3
   0   5   2 779.567 122.365  30
   0  -5  -2 1109.11 184.141   6
   0  -5  -2 927.180 168.086  34
   0  -5  -2 1316.60 216.627  35
   0  -5  -2 1114.01 118.344   2
   0  -5  -2 898.612 114.403   5
   0  -5  -2 1095.62 123.867   3
   0   5   3 468.378 122.365  30
   0  -5  -3 388.118 147.857   6
   0  -5  -3 236.112 113.200  34
   0   5   3 359.149 80.6580  31
   0  -5  -3 313.227 66.6482   3
   0  -5  -3 401.153 88.1497   2
   0  -5  -3 367.550 99.0543   5
   0  -5  -3 276.832 130.429  35
   0   5   4 4307.31 280.980  36
   0   5   4 4397.31 317.074  30
   0  -5  -4 3813.18 285.934  35
   0  -5  -4 4056.13 255.827   2
   0  -5  -4 4380.29 328.004   7
   0  -5  -4 4181.44 204.073   3
   0  -5  -4 4076.41 244.971   5
   0  -5  -4 4569.90 345.559  34
   0   5   4 4401.56 221.257  31
   0  -5  -4 4354.31 295.867   6
   0  -5  -5 107.439 149.772  34
   0   5   5 241.316 125.332  30
   0  -5  -5 360.919 74.9749   3
   0  -5  -5 428.671 115.176   6
   0   5   5 400.408 117.718  36
   0  -5  -5 421.393 127.668   7
   0  -5  -5 586.690 116.751   5
   0   5   5 402.372 91.3947  31
   0   5   6 114.787 88.2517  31
   0   5   6 191.571 102.877  36
   0  -5  -6 470.632 176.561  34
   0   5   6 243.242 160.583  30
   0  -5  -6 341.900 130.159   7
   0  -5  -6 314.250 120.515   5
   0  -5  -6 301.398 65.3113   3
   0  -5  -7 203.817 125.673   5
   0  -5  -7 200.385 140.096   7
   0  -5  -7 51.5525 44.2339   3
   0   5   7-150.666 110.678  31
   0  -5  -7 117.608 154.195  34
   0   5   7-83.0409 178.963  30
   0   5   7-42.9169 83.7125  36
   0  -5  -8 669.106 143.593   5
   0   5   8 658.546 126.174  31
   0  -5  -8 521.561 65.9942   3
   0   5   8 564.629 135.018  36
   0   5   8 904.471 256.817  30
   0  -5  -8 513.865 168.457  34
   0   5   9-101.634 109.995  31
   0  -5  -9 62.1479 119.845   5
   0   5   9-56.8835 129.713   8
   0  -5  -9 99.0350 177.583  34
   0   5   9 205.227 205.834  30
   0   5  10-21.4175 103.681  31
   0  -5 -10 49.8735 125.423   5
   0   5  10 165.537 209.298  30
   0   5  10 85.6594 109.389   8
   0  -5 -10 84.6494 200.641  34
   0   5  11 491.146 221.363  30
   0  -5 -11 406.622 156.453   5
   0   5  11 653.987 157.968  31
   0  -5 -11 333.600 207.100  34
   0   5  11 727.082 178.874   8
   0  -5 -12 1324.12 258.309   5
   0   5  12 1585.40 240.839  31
   0   5  12 1466.41 215.995   8
   0   5  12 1450.49 404.623  30
   0  -5 -12 1645.98 360.512  34
   0   5  13 2178.43 441.463  30
   0  -5 -13 2106.84 392.170  34
   0   5  13 2332.77 269.866   8
   0  -5 -13 2387.00 332.830   5
   0   5  13 2160.93 297.801  31
   0   5  14 9964.23 676.037  33
   0  -5 -14 9495.54 818.881  34
   0   5  14 8492.83 840.256  30
   0  -5 -14 10103.0 670.581   5
   0   5  14 8592.79 533.039   8
   0   5  14 9812.33 628.969  31
   0   5  15 6909.52 486.997   8
   0   5  15 7748.16 607.016  31
   0  -5 -15 7609.06 609.451   5
   0   5  15 8391.64 890.890  30
   0   5  15 8918.84 677.279  33
   0  -5 -15 6844.42 712.786  34
   0   5  16 779.651 337.011  30
   0  -5 -16 769.743 262.386   5
   0  -5 -16 887.769 317.169  34
   0  -5 -17 623.036 248.269   5
   0  -5 -17 449.164 142.494  29
   0   5  17 784.830 209.685  12
   0  -5 -17 752.204 164.792  25
   0  -5 -17 625.323 288.460  34
   0   5  17 456.352 328.902  30
   0  -5 -18 9234.19 472.116  25
   0  -5 -18 10757.5 796.398   5
   0   5  18 9045.95 974.167  30
   0   5  18 10709.5 603.881  12
   0  -5 -18 11819.1 484.119  29
   0  -5 -18 10010.0 888.301  34
   0  -5 -19 5640.77 337.796  29
   0   5  19 5645.55 463.720  12
   0   5  20 236.141 203.300  12
   0  -5 -20 401.217 125.799  29
   0   5  21-200.317 173.492  12
   0   5  22-20.9860 181.819  12
   0   5  23 143.562 174.163  12
   0   5  24 115.293 149.804  12
   0   5  25 495.688 147.995  12
   0  -5 -25 322.126 103.137  26
   0   5  26-39.1761 106.837  12
   0  -6  23 928.195 134.527  20
   0  -6  22 237.933 102.820  12
   0   6 -22 120.238 96.2725  28
   0  -6  21 1230.85 172.046  12
   0   6 -21 1318.81 203.122  28
   0   6 -20 161.479 135.476  28
   0  -6  20 143.334 126.794  12
   0  -6  19 189.243 158.675  22
   0  -6  19 464.140 174.317  12
   0   6 -19 74.9991 127.814  28
   0  -6  18 128.462 136.099  12
   0   6 -18 62.7786 158.282  28
   0  -6  18 49.3647 172.030  22
   0  -6  17 1862.16 262.635  12
   0   6 -17 1773.95 268.026  28
   0  -6  17 1554.38 269.379  22
   0   6 -16 2947.79 318.870  28
   0  -6  16 2451.40 294.700  12
   0  -6  16 2328.17 310.684  22
   0  -6  15 3501.74 329.495  12
   0   6 -15 3810.77 363.959  28
   0  -6  15 3680.00 323.415  15
   0  -6  15 3429.57 360.704  22
   0  -6  14-131.827 241.094  33
   0   6 -14 4.02568 129.473  32
   0  -6  14 379.296 204.378  22
   0  -6  14 227.052 152.788  12
   0  -6  14 58.8042 153.391  15
   0   6 -14 392.945 185.827   1
   0   6 -14 110.905 138.540  28
   0   6 -13 7158.86 444.880  28
   0  -6  13 6505.98 441.115  22
   0  -6  13 8593.50 786.134  33
   0   6 -13 7903.14 551.988   1
   0  -6  13 7662.65 415.461  15
   0   6 -13 6973.70 537.989  32
   0   6 -12 104.649 134.959   1
   0  -6  12-91.5345 230.838  33
   0   6 -12-144.581 126.913  32
   0  -6  12 2.31409 199.023  35
   0   6 -11-145.685 150.616  32
   0  -6  11 99.7330 219.361  35
   0   6 -11 139.132 156.516   1
   0  -6  11 63.6225 182.563  33
   0  -6  10 306.098 205.532  33
   0   6 -10 140.129 143.362   1
   0   6 -10 63.8849 112.842  32
   0  -6  10-11.7540 188.953  35
   0   6  -9 2484.16 291.131  32
   0   6  -9 2993.25 354.407   1
   0  -6   9 2932.42 420.900  33
   0  -6   9 2756.69 433.111  35
   0   6  -8 4591.44 411.011   1
   0  -6   8 4585.79 527.010  35
   0   6  -8 3974.67 348.540  32
   0  -6   8 4354.15 468.074  33
   0  -6   7 1705.00 350.058   6
   0  -6   7 2185.73 366.593  35
   0   6  -7 1569.30 220.374  32
   0   6  -7 2080.56 291.210   1
   0  -6   7 1851.57 301.558  33
   0  -6   6 160.382 228.546   6
   0   6  -6 327.930 89.7376   5
   0  -6   6 74.9868 119.122   3
   0  -6   6 128.456 131.238  33
   0   6  -6 214.850 123.289  32
   0   6  -6-55.5074 135.586   1
   0  -6   6 82.4374 226.031  35
   0  -6   5 1917.36 249.586   3
   0  -6   5 1889.45 270.428  33
   0  -6   5 2387.39 372.514   6
   0   6  -5 1853.01 210.151  32
   0  -6   5 2031.68 315.872  35
   0   6  -5 2220.52 283.050   1
   0  -6   4-13.6594 167.677   6
   0   6  -4 51.4952 141.476   1
   0  -6   4 123.415 123.191  33
   0   6  -4 45.2293 119.732  32
   0  -6   4 82.6321 113.321   3
   0  -6   4 227.895 212.193  35
   0  -6   3 3730.82 398.024  35
   0  -6   3 3436.06 399.217   6
   0   6  -3 3675.19 287.249  32
   0  -6   3 3748.87 295.753   3
   0  -6   3 3404.31 170.109   2
   0  -6   3 3950.28 310.846  33
   0  -6   2 3191.27 358.334  35
   0   6  -2 3324.02 273.278  32
   0  -6   2 2508.61 134.719   2
   0  -6   2 2703.09 357.998   6
   0  -6   2 2631.39 243.103   3
   0  -6   2 2954.40 249.192  33
   0  -6   1 5853.87 333.105   3
   0  -6   1 6697.64 511.560   6
   0  -6   1 6639.64 316.999  33
   0  -6   1 5245.17 182.836  34
   0  -6   1 6560.64 490.098  35
   0  -6   1 5603.50 205.056   2
   0   6  -1 6878.48 389.250  32
   0  -6   0 23979.6 701.777   3
   0  -6   0 24666.1 612.365  33
   0   6   0 24623.7 805.450  32
   0  -6   0 23251.5 533.654   2
   0  -6   0 24622.5 610.550  34
   0  -6   0 23527.7 963.619   6
   0  -6   0 24995.2 946.856  35
   0   6   1 308.956 48.5854  30
   0  -6  -1 516.725 82.9970   2
   0  -6  -1 535.005 111.888   3
   0  -6  -1 679.524 193.918   6
   0  -6  -1 562.200 74.1852  33
   0   6   1 524.591 152.950  32
   0  -6  -1 815.235 206.413  35
   0  -6  -1 502.418 106.090  34
   0  -6  -2 20343.3 683.993  34
   0  -6  -2 19274.6 791.720   6
   0  -6  -2 21067.4 794.554  35
   0  -6  -2 19059.9 570.217   3
   0   6   2 20497.7 559.247  30
   0  -6  -2 18949.2 526.440   2
   0  -6  -3 5339.03 394.893   6
   0  -6  -3 5619.37 404.989  35
   0   6   3 5802.81 329.849  30
   0   6   3 5605.47 268.279  31
   0  -6  -3 5548.94 283.495   5
   0  -6  -3 4993.56 270.027   2
   0  -6  -3 5218.62 360.263  34
   0  -6  -3 5392.59 262.416   3
   0   6   4 31614.2 754.000  31
   0  -6  -4 32828.1 1050.08  34
   0   6   4 32066.7 936.916  36
   0   6   4 31082.0 941.100  30
   0  -6  -4 34187.9 998.322  35
   0  -6  -4 33588.7 756.224   3
   0  -6  -4 31488.2 1013.43   7
   0  -6  -4 31716.5 982.302   6
   0  -6  -4 35093.4 847.416   5
   0   6   5 10907.4 560.936  30
   0  -6  -5 11243.4 360.367   3
   0   6   5 11280.6 499.595  36
   0  -6  -5 11285.9 455.310   5
   0  -6  -5 11198.5 504.930   6
   0   6   5 10848.8 386.669  31
   0  -6  -5 11493.0 587.274   7
   0  -6  -5 11863.0 629.801  34
   0  -6  -6 16133.9 586.917   5
   0  -6  -6 16195.6 433.272   3
   0   6   6 15460.2 725.171  30
   0  -6  -6 16564.2 728.859   7
   0  -6  -6 15982.8 788.917  34
   0   6   6 15706.4 598.462  36
   0   6   6 15798.0 502.655  31
   0   6   7 283.726 113.101  31
   0  -6  -7 416.832 199.430   7
   0   6   7 411.797 149.410  36
   0   6   7 340.391 210.289  30
   0  -6  -7 491.334 158.536   5
   0  -6  -7 446.324 247.675  34
   0  -6  -7 312.322 66.7698   3
   0   6   8 8428.77 402.173  31
   0   6   8 8426.81 616.548  30
   0  -6  -8 8500.40 563.136   7
   0   6   8 8274.72 432.832  36
   0  -6  -8 7985.50 446.676   5
   0  -6  -8 8489.17 627.069  34
   0   6   9 416.488 108.502  31
   0  -6  -9 619.995 216.195  34
   0   6   9 489.543 241.280  30
   0   6   9 502.723 141.215   8
   0  -6  -9 665.354 165.017   5
   0   6  10 3323.37 291.627  31
   0  -6 -10 3017.15 435.179  34
   0   6  10 3315.14 289.768   8
   0  -6 -10 3125.58 307.320   5
   0   6  10 3665.85 476.347  30
   0   6  11 9626.59 775.879  30
   0  -6 -11 9310.20 743.437  34
   0   6  11 9970.95 527.224  31
   0  -6 -11 8472.26 558.942   5
   0   6  11 9416.49 502.567   8
   0  -6 -12 1146.68 242.733   5
   0   6  12 1071.88 318.881  30
   0   6  12 1306.00 227.249   8
   0   6  12 1550.16 237.296  31
   0  -6 -12 1568.49 348.891  34
   0   6  13 2835.05 312.154   8
   0  -6 -13 2958.39 363.654   5
   0   6  13 3633.69 560.163  30
   0  -6 -13 3336.68 486.390  34
   0  -6 -14 220.927 152.923   5
   0   6  14 245.343 275.162  30
   0  -6 -14 25.5252 232.858  34
   0   6  14 214.073 165.661   8
   0  -6 -15 1289.66 360.691  34
   0   6  15 2031.73 428.812  30
   0   6  15 1478.72 253.889   8
   0  -6 -15 1319.15 293.416   5
   0  -6 -16 378.033 240.957  34
   0   6  16 282.411 164.710   8
   0  -6 -16 511.789 227.696   5
   0   6  16 273.402 280.033  30
   0   6  17 142.599 283.511  30
   0  -6 -17 158.685 124.770  29
   0   6  17 313.400 184.019  12
   0  -6 -17 611.630 307.005  34
   0  -6 -17 80.0901 120.538  25
   0  -6 -17 175.996 239.047   5
   0   6  18 9754.09 579.140  12
   0   6  18 9557.16 982.989  30
   0  -6 -18 9011.60 729.918   5
   0  -6 -18 8869.58 456.000  25
   0  -6 -18 10232.6 468.556  29
   0  -6 -19 4123.05 306.897  29
   0   6  19 3621.29 375.700  12
   0  -6 -19 3140.11 294.664  25
   0   6  20-79.3375 168.877  12
   0  -6 -20 357.519 148.185  29
   0   6  21 44.6725 154.710  12
   0  -6 -21 320.484 124.714  29
   0   6  22 2540.45 314.574  12
   0   6  23 222.986 165.345  12
   0   6  24 1130.59 215.283  12
   0  -6 -25 595.741 128.169  26
   0   6  25 678.167 175.321  12
   0   6  26 487.958 133.508  12
   0   7 -22-85.4459 80.5379  28
   0  -7  22 38.0170 97.5235  20
   0   7 -21 187.444 104.961  28
   0   7 -20-149.785 113.500  28
   0  -7  19 452.746 134.225  12
   0   7 -19 642.893 188.997  28
   0   7 -18 748.715 182.312  28
   0  -7  18 695.842 175.503  12
   0   7 -17 487.857 170.188  28
   0  -7  17 626.213 189.896  22
   0  -7  17 997.739 199.310  12
   0  -7  16-26.3103 168.663  22
   0  -7  16-0.30745 143.871  12
   0   7 -16-21.3709 165.579  28
   0  -7  15 166.203 180.635  22
   0  -7  15 268.830 157.145  15
   0   7 -15 337.201 176.326  28
   0  -7  14 691.145 180.529  14
   0  -7  14 1242.47 249.355  22
   0  -7  14 690.732 170.274  15
   0   7 -14 605.366 185.938  28
   0   7 -13 321.725 145.983  32
   0  -7  13 596.739 176.753  14
   0  -7  13 578.124 301.187  33
   0   7 -13 419.978 137.420  28
   0  -7  13 948.922 198.445  15
   0  -7  13 886.837 213.581  22
   0   7 -13 451.662 183.668   1
   0  -7  12 6868.17 749.268  35
   0   7 -12 7514.14 542.479  32
   0  -7  12 7012.64 426.352  14
   0  -7  12 7407.47 395.424  15
   0   7 -12 7439.58 451.347  28
   0  -7  12 6160.94 440.358  22
   0  -7  12 7324.16 714.873  33
   0   7 -12 7925.17 588.533   1
   0  -7  11 702.784 253.806  33
   0   7 -11 496.388 179.906  32
   0   7 -11 276.035 182.020   1
   0  -7  11 500.967 214.704  35
   0  -7  10 1383.28 364.602  35
   0   7 -10 1503.64 282.157   1
   0  -7  10 1718.64 359.060  33
   0   7 -10 1221.51 236.439  32
   0   7  -9 575.525 176.995   1
   0  -7   9 355.370 164.597  33
   0   7  -9 668.127 180.839  32
   0  -7   9 348.980 193.607  35
   0   7  -8-41.4215 100.760  32
   0  -7   8-9.67543 184.331  33
   0   7  -8-260.453 178.745   1
   0   7  -7 3809.26 394.296   1
   0   7  -7 3583.33 330.815  32
   0  -7   7 2692.11 374.700  33
   0  -7   7 3041.29 464.195  35
   0  -7   6 903.784 280.389  35
   0   7  -6 310.198 140.138  32
   0  -7   6 633.991 231.456   6
   0   7  -6 498.611 184.296   1
   0  -7   6 537.658 186.826   3
   0  -7   6 493.193 197.302  33
   0  -7   5 13961.7 870.840  35
   0  -7   5 15211.3 727.492  33
   0   7  -5 15845.5 764.058   1
   0   7  -5 15136.3 642.709  32
   0  -7   5 12999.8 871.394   6
   0  -7   5 14247.3 667.608   3
   0   7  -4 646.944 181.308   1
   0  -7   4 868.750 255.571   6
   0   7  -4 490.262 123.950  32
   0  -7   4 653.125 237.954  35
   0  -7   4 802.982 177.718  33
   0  -7   4 797.511 171.701   3
   0  -7   3 1908.79 324.211   6
   0  -7   3 2262.62 249.504  33
   0   7  -3 2539.66 257.721  32
   0  -7   3 2474.89 391.876  35
   0  -7   3 2386.83 266.648   3
   0  -7   2 1746.22 208.824  33
   0  -7   2 1240.99 275.847   6
   0  -7   2 1371.00 280.794  35
   0  -7   2 1505.18 189.001   3
   0   7  -2 1590.80 212.729  32
   0  -7   1 815.645 178.007   3
   0  -7   1 633.959 285.418   6
   0   7  -1 991.663 211.772  32
   0  -7   1 796.453 146.853  33
   0  -7   1 871.738 300.517  35
   0  -7   0 8421.29 283.538   2
   0  -7   0 9214.24 634.041   6
   0  -7   0 9532.34 342.330  34
   0  -7   0 9536.69 623.579  35
   0   7   0 10160.5 515.211  32
   0  -7   0 8657.26 430.303   3
   0  -7   0 9636.02 352.318  33
   0  -7  -1 3688.89 192.513   2
   0   7   1 4348.44 353.126  32
   0  -7  -1 3946.09 277.732   3
   0  -7  -1 3718.98 397.943   6
   0  -7  -1 4215.80 404.479  35
   0  -7  -1 4207.17 270.238  34
   0  -7  -2 806.246 226.910   6
   0  -7  -2 655.532 103.220   2
   0  -7  -2 780.802 159.700  34
   0   7   2 638.966 90.2893  30
   0  -7  -2 728.340 129.998   3
   0  -7  -2 775.167 231.293  35
   0  -7  -3 72.4809 73.0700   3
   0  -7  -3 146.840 144.539   6
   0  -7  -3-115.938 192.912  35
   0   7   3 103.022 70.5065  31
   0   7   3-9.92893 97.9894  30
   0  -7  -3-86.2859 156.646  34
   0   7   4 665.343 158.595  36
   0  -7  -4 860.151 211.173  35
   0  -7  -4 594.704 184.420   6
   0  -7  -4 737.019 186.010   7
   0   7   4 780.341 107.608  31
   0  -7  -4 632.307 118.686   5
   0   7   4 734.973 145.733  30
   0  -7  -4 681.684 190.854  34
   0  -7  -4 757.357 105.657   3
   0   7   5 46.7147 145.850  36
   0  -7  -5 200.273 130.476   6
   0   7   5-41.1057 76.7555  31
   0  -7  -5 98.9673 96.0271   5
   0  -7  -5 160.367 143.350   7
   0   7   5-55.1722 130.348  30
   0  -7  -5 162.402 177.967  34
   0  -7  -5 177.547 92.8946   3
   0  -7  -6 370.654 80.3252   3
   0  -7  -6 409.058 172.170   7
   0  -7  -6 485.061 209.404  34
   0   7   6 204.733 125.974  36
   0   7   6 344.436 142.812  30
   0  -7  -6 411.277 126.033   5
   0   7   6 202.166 68.6369  31
   0  -7  -7 33686.1 1176.02   7
   0   7   7 34760.6 1001.02  36
   0   7   7 33291.9 832.739  31
   0   7   7 32776.3 1183.11  30
   0  -7  -7 31696.9 953.748   5
   0  -7  -7 31789.9 1252.44  34
   0   7   8 14932.9 827.902  30
   0  -7  -8 14318.3 847.970  34
   0  -7  -8 15139.3 782.442   7
   0   7   8 14092.7 607.569  36
   0  -7  -8 14120.6 618.158   5
   0   7   9 3377.56 303.454  36
   0  -7  -9 3363.11 438.583  34
   0  -7  -9 3973.03 411.883   7
   0  -7  -9 3662.33 321.845   5
   0   7   9 3427.31 416.028  30
   0  -7 -10-15.7791 116.104   5
   0   7  10 280.491 167.604   8
   0   7  10 594.048 266.588  30
   0  -7 -10 142.463 189.493  34
   0   7  11 246.089 155.109   8
   0  -7 -11 105.727 130.299   5
   0  -7 -11 183.249 218.719  34
   0   7  11 22.0664 226.322  30
   0   7  12-135.840 140.251   8
   0  -7 -12 175.576 153.494   5
   0  -7 -12 323.367 229.535  34
   0   7  12 163.013 216.669  30
   0   7  13 2240.24 288.293   8
   0   7  13 2707.36 525.237  30
   0  -7 -13 2396.48 455.779  34
   0  -7 -13 2066.75 314.860   5
   0   7  14 372.658 162.714   8
   0   7  14 391.601 260.925  30
   0  -7 -14 285.973 211.101  34
   0  -7 -14 114.580 150.892   5
   0   7  15 636.190 204.429   8
   0   7  15 489.615 249.946  30
   0  -7 -15 730.265 227.003   5
   0  -7 -15 1054.67 337.794  34
   0  -7 -16 3498.85 290.199  29
   0   7  16 3294.45 578.119  30
   0   7  16 2829.27 357.753   8
   0  -7 -16 2886.86 281.399   9
   0  -7 -16 2655.85 412.884   5
   0  -7 -16 3590.58 289.134  25
   0  -7 -16 2414.21 449.837  34
   0   7  16 3113.42 313.185  12
   0  -7 -17 390.129 142.356  29
   0  -7 -17 107.516 118.808   9
   0   7  17 155.600 143.905  12
   0   7  17 710.822 220.562   8
   0  -7 -17 330.349 192.410   5
   0  -7 -17 299.166 136.778  25
   0  -7 -17 309.007 229.992  34
   0   7  17 355.320 287.838  30
   0   7  18 218.747 161.766  12
   0  -7 -18 245.224 133.612  25
   0  -7 -18 642.078 176.514  29
   0   7  19 263.849 182.058  12
   0  -7 -19-17.2668 137.517  29
   0  -7 -19 80.6196 120.872  25
   0  -7 -20 51.0602 123.410  25
   0   7  20 390.293 177.123  12
   0  -7 -20 226.889 133.953  29
   0  -7 -21 293.287 139.934  29
   0   7  21 332.069 165.911  12
   0   7  22 385.886 173.765  12
   0  -7 -22 501.249 146.061  29
   0   7  23 25.9592 137.798  12
   0   7  24 440.398 146.757  12
   0  -7 -24 390.758 148.851  26
   0   7  25 196.602 120.979  12
   0  -7 -25 57.8804 99.4867  26
   0  -7 -26 539.913 102.014  26
   0   7  26 586.021 119.401  12
   0  -8  21 170.438 104.213  20
   0   8 -21-108.218 77.9120  28
   0   8 -20 250.653 113.818  28
   0   8 -19-131.851 113.393  28
   0   8 -18 518.705 136.688  28
   0   8 -17 917.635 185.627  28
   0   8 -16 3058.84 300.556  28
   0  -8  15 143.654 136.535  15
   0   8 -15 28.1858 150.198  28
   0  -8  15 201.576 148.781  14
   0  -8  15 255.309 192.993  22
   0   8 -14 739.341 183.239  28
   0  -8  14 1128.46 213.485  15
   0  -8  14 1066.21 213.660  14
   0  -8  14 967.023 228.625  22
   0   8 -13 776.100 175.849  28
   0  -8  13 649.552 204.696  14
   0  -8  13 719.833 177.709  15
   0  -8  13 737.665 207.048  22
   0   8 -12 2771.51 376.296   1
   0  -8  12 1916.63 403.982  33
   0   8 -12 1956.83 228.230  28
   0  -8  12 2184.56 268.944  14
   0  -8  12 1913.41 432.137  35
   0  -8  12 1963.20 243.626  15
   0  -8  12 1690.61 256.853  22
   0  -8  11 1392.79 196.013  15
   0  -8  11 1425.82 251.578  22
   0   8 -11 1694.11 286.651   1
   0  -8  11 1081.14 416.856  35
   0  -8  11 1566.08 345.275  33
   0  -8  11 1435.27 216.405  14
   0  -8  10 1046.37 313.057  35
   0   8 -10 717.772 226.907   1
   0   8 -10 1016.46 215.646  32
   0  -8  10 372.790 192.477  33
   0  -8   9 2758.78 464.434  35
   0   8  -9 2576.04 308.363  32
   0  -8   9 3175.77 447.333  33
   0   8  -9 3200.84 403.763   1
   0  -8   8 1900.76 418.316  35
   0  -8   8 1082.50 259.581  33
   0   8  -8 1849.00 287.320   1
   0   8  -8 1291.41 227.936  32
   0  -8   7 196.283 270.207  35
   0  -8   7-103.305 172.805  33
   0   8  -7 353.910 190.215   1
   0   8  -7 202.091 127.048  32
   0  -8   6 1623.71 376.791  35
   0   8  -6 1635.47 293.443   1
   0   8  -6 1531.88 225.706  32
   0  -8   6 1452.85 262.061  33
   0  -8   5 138.866 116.934   3
   0  -8   5 259.175 251.148   6
   0   8  -5 293.561 122.672  32
   0   8  -5 346.581 192.179   1
   0  -8   5 299.689 238.520  35
   0  -8   5 201.730 155.308  33
   0   8  -4 343.599 206.180   1
   0  -8   4-186.835 251.922   6
   0   8  -4 168.759 95.7162  32
   0  -8   4 132.178 119.390  33
   0  -8   4 174.072 124.689   3
   0  -8   4 100.753 203.305  35
   0  -8   3 1107.05 297.811  35
   0  -8   3 1499.92 203.738  33
   0  -8   3 1223.09 319.401   6
   0  -8   3 1279.42 227.142   3
   0   8  -3 1246.52 198.610  32
   0   8  -2 10252.2 556.321  32
   0  -8   2 10061.1 749.789   6
   0  -8   2 10230.8 539.365   3
   0  -8   2 10151.4 743.340  35
   0  -8   1 1170.16 296.778  35
   0  -8   1 1304.10 298.775   6
   0   8  -1 1161.87 196.233  32
   0  -8   1 865.964 173.561   3
   0   8   0 965.960 201.394  32
   0  -8   0 915.168 258.880  35
   0  -8   0 914.200 183.872   3
   0  -8   0 925.133 278.004   6
   0   8   1 1270.01 215.042  32
   0  -8  -1 1449.25 296.927  35
   0  -8  -1 916.475 162.019   3
   0  -8  -1 844.331 245.637   6
   0  -8  -2 20989.8 1000.53   6
   0  -8  -2 20664.1 956.482  35
   0  -8  -2 20506.7 731.865  34
   0   8   2 22259.7 883.878  32
   0  -8  -2 21108.9 692.573   3
   0  -8  -3 5441.01 453.648  35
   0  -8  -3 4611.36 431.655   6
   0  -8  -3 4405.30 360.484  34
   0  -8  -3 4921.20 291.723   3
   0  -8  -4 20047.5 894.407   7
   0   8   4 20808.1 706.889  30
   0  -8  -4 21495.6 920.950  35
   0   8   4 21459.4 866.330  36
   0  -8  -4 20133.9 859.228  34
   0  -8  -4 21840.2 924.619   6
   0  -8  -4 21045.7 652.095   3
   0   8   5 194.462 124.348  30
   0  -8  -5 69.2244 94.6197   5
   0  -8  -5 235.003 163.671  34
   0  -8  -5 71.2563 144.344   7
   0  -8  -5 173.123 129.820   6
   0   8   5 368.640 148.557  36
   0  -8  -5 179.834 68.9815   3
   0   8   6 52755.6 1475.91  30
   0  -8  -6 52611.2 1299.06   5
   0  -8  -6 51139.2 1595.23   7
   0  -8  -6 51383.3 1627.50  34
   0   8   6 56567.7 1451.07  36
   0  -8  -7 677.341 227.880  34
   0   8   7 455.630 134.423  36
   0   8   7 620.704 174.860  30
   0  -8  -7 390.663 156.946   7
   0  -8  -7 596.340 151.316   5
   0   8   8 15.1933 153.360  30
   0  -8  -8 316.041 222.577  34
   0  -8  -8-11.3855 111.444   5
   0   8   8 183.813 124.823  36
   0  -8  -8 15.9868 138.600   7
   0   8   9 5799.12 410.862  36
   0  -8  -9 5537.83 566.292  34
   0  -8  -9 6695.61 565.448   7
   0  -8  -9 6281.46 436.177   5
   0   8   9 4929.34 503.602  30
   0   8  10 271.503 117.587  36
   0   8  10 359.227 149.274   8
   0  -8 -10 595.417 257.614  34
   0  -8 -10 653.329 187.402   5
   0   8  10 372.656 204.519  30
   0  -8 -11 1827.36 387.990  34
   0   8  11 1518.33 245.432   8
   0  -8 -11 1718.16 273.361   5
   0   8  11 1587.17 350.586  30
   0  -8 -12 2791.09 470.490  34
   0  -8 -12 2965.24 353.158   5
   0   8  12 3435.11 345.830   8
   0   8  12 2988.60 481.120  30
   0   8  13 254.720 148.960   8
   0  -8 -13 349.659 258.436  34
   0  -8 -13-102.045 137.728   5
   0   8  13 302.164 267.753  30
   0   8  14 241.313 180.197   8
   0  -8 -14-15.3527 151.835   5
   0   8  14 20.6385 219.449  30
   0  -8 -14 360.185 265.844  34
   0   8  15 617.273 317.425  30
   0  -8 -15 485.780 153.988   9
   0   8  15 459.541 191.209   8
   0  -8 -15 540.329 153.314  29
   0  -8 -15 311.187 162.149   5
   0  -8 -15 341.065 223.065  34
   0   8  16 805.244 200.336  12
   0  -8 -16 798.902 188.982   9
   0  -8 -16 793.145 258.467   5
   0  -8 -16 720.483 300.798  34
   0   8  16 686.263 320.665  30
   0  -8 -16 951.468 184.496  25
   0  -8 -16 1085.84 195.889  29
   0   8  16 652.725 216.019   8
   0   8  17 379.928 183.745  12
   0   8  17 964.220 348.726  30
   0  -8 -17 495.494 157.896  25
   0  -8 -17 14.9208 183.712   5
   0   8  17 743.567 226.087   8
   0  -8 -17 489.382 163.436   9
   0  -8 -17 481.319 155.665  29
   0   8  18-73.6082 141.877  12
   0  -8 -18 297.793 167.168  29
   0  -8 -18 92.9207 124.527  25
   0  -8 -18 257.859 155.837   9
   0   8  19-31.9018 149.146  12
   0  -8 -19 305.066 143.186  25
   0  -8 -19 57.5129 138.043   9
   0  -8 -19 322.827 147.888  29
   0   8  20 523.372 177.486  12
   0  -8 -20 286.309 142.111  29
   0  -8 -21 316.280 148.288  29
   0   8  21 274.825 146.833  12
   0   8  22 79.3948 135.105  12
   0  -8 -22 158.020 109.245  29
   0   8  23-192.534 150.385  12
   0  -8 -23 129.012 103.995  29
   0   8  24 95.1892 128.297  12
   0  -8 -24-14.7905 115.960  26
   0  -8 -25 1259.35 159.784  26
   0   8  25 1680.55 187.920  12
   0  -8 -26 27.0133 68.3691  26
   0   8  26 68.6795 74.3934  12
   0  -9  21 123.742 86.2578  20
   0  -9  20 378.603 125.543  20
   0   9 -20 320.497 86.3548  28
   0   9 -19 395.486 104.193  28
   0   9 -18-40.5450 108.845  28
   0   9 -17 182.197 121.361  28
   0  -9  17 77.5676 86.8274  17
   0  -9  16 41.8448 112.905  14
   0   9 -16 23.3268 115.280  28
   0  -9  15-94.3261 143.237  14
   0   9 -15-48.7117 127.788  28
   0  -9  14 2700.30 280.689  15
   0   9 -14 2690.83 270.995  28
   0  -9  14 2970.92 297.476  14
   0  -9  13 964.850 183.162  14
   0   9 -13 986.252 199.881  28
   0  -9  13 1230.65 191.499  15
   0  -9  12 4249.93 323.816  15
   0  -9  12 3886.90 367.327  22
   0  -9  12 3614.52 337.985  14
   0  -9  11 6678.54 463.496  22
   0  -9  11 7298.97 470.628  14
   0  -9  11 7430.46 389.894  15
   0   9 -11 8943.32 666.708   1
   0  -9  11 9092.45 883.819  35
   0  -9  10 742.097 191.899  14
   0  -9  10 1222.36 388.282  35
   0  -9  10 923.364 223.067  22
   0  -9  10 672.709 156.408  15
   0   9 -10 1240.35 292.747   1
   0  -9   9 2267.83 271.392  14
   0  -9   9 2235.16 274.732  22
   0  -9   9 2601.38 490.140  35
   0   9  -9 1968.59 332.753   1
   0   9  -8 6086.77 559.171   1
   0  -9   8 5355.39 657.995  35
   0  -9   7 944.809 311.094  35
   0   9  -7 874.450 187.009  32
   0   9  -7 439.601 209.290   1
   0   9  -6 392.573 147.529  32
   0   9  -6 1229.25 290.055   1
   0  -9   6 1061.73 354.520  35
   0   9  -5 1085.85 270.889   1
   0   9  -5 1116.92 197.215  32
   0  -9   5 805.344 289.924  35
   0  -9   4 1952.67 369.140  35
   0  -9   4 2365.94 302.689   3
   0   9  -4 2613.43 289.760  32
   0   9  -4 2882.16 379.948   1
   0   9  -3 16.7052 99.0886  32
   0  -9   3 251.254 289.260  35
   0  -9   3 256.057 145.681   3
   0  -9   3-14.6210 198.217   6
   0   9  -3 255.346 183.992   1
   0  -9   2 597.726 164.892   3
   0  -9   2 872.753 314.190  35
   0   9  -2 937.262 213.470  32
   0  -9   2 923.049 278.870   6
   0   9  -1 738.543 173.175  32
   0  -9   1 1013.90 318.192  35
   0  -9   1 711.084 173.107   3
   0  -9   1 1148.01 309.228   6
   0   9   0 6068.26 446.215  32
   0  -9   0 5250.64 556.992  35
   0  -9   0 5238.26 377.600   3
   0  -9   0 5134.05 560.030   6
   0   9   1 8.93354 142.200  32
   0  -9  -1 343.464 261.724   6
   0  -9  -1 114.997 175.657  35
   0  -9  -1 238.070 118.318   3
   0  -9  -2 2693.04 378.226   6
   0  -9  -2 3010.26 264.047   3
   0  -9  -2 3162.00 400.124  35
   0   9   2 2636.35 318.620  32
   0  -9  -3 4747.30 313.692   3
   0  -9  -3 4659.79 497.472  35
   0   9   3 4483.55 412.260  32
   0  -9  -3 4655.89 488.540   6
   0  -9  -3 4738.15 383.679  34
   0   9   4 1209.58 255.182  36
   0  -9  -4 1084.79 152.036   3
   0  -9  -4 1012.20 224.801  34
   0  -9  -4 924.089 222.661   7
   0  -9  -4 1091.85 238.281   6
   0  -9  -5 160.358 155.419   7
   0  -9  -5 79.5889 70.5420   3
   0   9   5-4.23998 120.722  36
   0  -9  -5 141.249 129.920  34
   0  -9  -6 9454.03 660.342  34
   0  -9  -6 10140.0 491.782   5
   0  -9  -6 10247.1 690.345   7
   0   9   6 10217.9 585.411  36
   0   9   7 2934.11 306.291  36
   0  -9  -7 2665.39 372.266   7
   0  -9  -7 2549.09 371.090  34
   0  -9  -7 2777.81 282.395   5
   0   9   7 2290.16 308.404  30
   0  -9  -8 818.124 243.174  34
   0  -9  -8 1096.09 287.422   7
   0   9   8 921.631 219.955  30
   0  -9  -8 1045.60 203.463   5
   0   9   8 1123.91 202.480  36
   0   9   9 762.665 187.372  36
   0  -9  -9 781.676 189.216   5
   0  -9  -9 699.852 281.046  34
   0   9   9 521.946 246.951  30
   0  -9  -9 811.187 259.388   7
   0  -9 -10 1113.87 335.267  34
   0   9  10 1401.77 221.650  36
   0  -9 -10 1519.89 225.050   5
   0   9  10 1512.09 253.327   8
   0   9  10 1323.31 317.665  30
   0  -9 -11 3128.10 351.517   5
   0  -9 -11 3455.87 519.669  34
   0   9  11 2599.95 414.828  30
   0   9  11 3170.21 340.654   8
   0   9  12 1778.34 393.998  30
   0   9  12 2437.75 311.743   8
   0  -9 -12 1912.29 276.908   5
   0  -9 -12 2075.10 405.796  34
   0  -9 -13 1115.76 257.664   5
   0   9  13 877.438 211.857   8
   0  -9 -13 729.548 279.637  34
   0   9  13 1061.44 314.957  30
   0  -9 -14 2612.48 362.819   5
   0  -9 -14 3167.75 298.835   9
   0  -9 -14 2933.38 260.897  29
   0  -9 -14 2669.67 497.161  34
   0   9  14 2760.53 362.644   8
   0   9  14 2666.94 521.154  30
   0  -9 -15 928.022 177.865   9
   0  -9 -15 803.529 154.618  25
   0  -9 -15 1085.20 202.033  29
   0   9  15 675.665 294.323  30
   0  -9 -15 545.800 303.856  34
   0   9  15 813.739 244.158   8
   0  -9 -15 965.663 267.229   5
   0  -9 -16 1406.40 218.102   9
   0  -9 -16 1803.40 215.976  25
   0  -9 -16 2025.42 362.203   5
   0   9  16 1887.39 462.958  30
   0   9  16 1729.21 311.155   8
   0  -9 -16 1725.47 441.449  34
   0  -9 -16 1625.01 233.728  29
   0  -9 -17 1997.58 244.074  25
   0  -9 -17 1865.55 243.557  29
   0  -9 -17 1615.72 250.550   9
   0  -9 -18 104.553 134.013  29
   0  -9 -18 66.8265 154.768   9
   0  -9 -18 67.9753 121.767  25
   0  -9 -19 1268.06 204.246  29
   0   9  19 1061.07 212.085  12
   0  -9 -19 1274.42 217.717   9
   0  -9 -19 1041.20 187.932  25
   0  -9 -20 996.137 168.199  25
   0  -9 -20 866.543 186.810  29
   0   9  20 1363.38 226.025  12
   0   9  21 821.542 185.766  12
   0  -9 -21 537.362 156.276  29
   0   9  22 180.581 127.143  12
   0  -9 -22 14.9887 102.724  29
   0  -9 -23 196.689 144.319  26
   0  -9 -23-62.2001 94.0831  29
   0  -9 -24 82.8668 111.287  26
   0   9  24 179.328 106.211  12
   0  -9 -25 503.685 115.809  26
   0  -9 -26-75.7482 74.6089  26
   0 -10  20 76.1787 85.7993  20
   0 -10  19 319.015 117.843  20
   0 -10  18 123.078 124.008  20
   0  10 -17 486.618 110.609  28
   0 -10  17 705.551 135.867  17
   0 -10  16 338.311 124.653  17
   0  10 -16 438.070 115.344  28
   0 -10  16 448.917 139.518  14
   0 -10  15 208.436 132.906  14
   0 -10  15 92.4021 102.987  17
   0 -10  14 26.8080 137.892  14
   0 -10  14 119.857 128.329  15
   0 -10  13-74.7278 151.208  15
   0 -10  13-111.601 150.580  14
   0 -10  12 244.399 161.503  15
   0 -10  12 4.74872 151.939  14
   0 -10  11 129.812 147.077  14
   0 -10  11 143.864 123.125  15
   0 -10  10 672.961 151.087  15
   0 -10  10 792.822 211.908  14
   0 -10   9 721.222 184.288  14
   0  10  -9 945.607 272.060   1
   0 -10   9 970.087 374.551  35
   0 -10   8 428.402 178.395  14
   0  10  -8 183.061 177.904   1
   0  10  -7 683.135 243.412   1
   0 -10   7 237.822 311.618  35
   0 -10   7-66.3843 130.155  14
   0 -10   6 355.214 308.236  35
   0  10  -6 144.943 170.585   1
   0  10  -5 48.8670 209.473   1
   0 -10   5 289.462 285.325  35
   0  10  -4 183.412 107.857  32
   0  10  -4-51.7873 201.371   1
   0 -10   4-166.291 235.040  35
   0 -10   3 0.81854 282.916  35
   0  10  -3 355.013 186.093   1
   0  10  -3 268.706 139.480  32
   0 -10   3 192.227 142.018   3
   0 -10   2 190.753 122.697   3
   0  10  -2-29.8223 197.457   1
   0  10  -2 78.6736 127.783  32
   0 -10   2-135.220 280.599  35
   0  10  -1 1566.48 253.283  32
   0 -10   1 1625.40 360.105  35
   0 -10   1 1534.38 237.649   3
   0 -10   0 1512.65 356.724  35
   0 -10   0 1446.15 233.466   3
   0  10   0 1664.16 256.346  32
   0 -10  -1 294.940 233.543  35
   0 -10  -1 226.560 126.189   3
   0  10   1 425.766 149.906  32
   0  10   2 1109.68 236.546  32
   0 -10  -2 592.303 243.641  35
   0 -10  -2 624.740 162.617   3
   0 -10  -3 5165.83 503.098   7
   0 -10  -3 6387.48 398.984   3
   0  10   3 6169.64 503.482  32
   0 -10  -3 6663.30 614.216  35
   0  10   4 7230.79 542.097  32
   0 -10  -4 9216.97 439.359   3
   0 -10  -4 7889.48 620.948   7
   0  10   4 8368.16 590.082  36
   0  10   5 69.1956 155.343  36
   0 -10  -5 543.997 194.944  34
   0 -10  -5 240.037 172.767   7
   0 -10  -6 651.188 190.423  34
   0  10   6 1302.41 241.505  36
   0 -10  -6 826.512 235.690   7
   0 -10  -7 2925.61 425.197   7
   0 -10  -7 3025.09 421.949  34
   0  10   7 4005.25 389.165  36
   0 -10  -8 33.9053 190.410  34
   0 -10  -8 232.788 174.123   7
   0  10   8 383.235 130.135  36
   0 -10  -8 123.914 100.905   5
   0  10   9 296.154 147.135  36
   0 -10  -9-48.1284 174.346  34
   0 -10  -9 73.5794 162.493   7
   0 -10  -9-82.0832 96.8094   5
   0 -10 -10 275.189 139.534   5
   0  10  10 359.710 147.629  36
   0 -10 -10 114.611 181.156  34
   0  10  10 191.164 148.009   8
   0  10  10 314.568 205.768  30
   0  10  11 485.630 217.619  30
   0  10  11 920.854 234.009   8
   0 -10 -11 440.013 201.140  34
   0 -10 -11 660.145 196.300   5
   0 -10 -12 3577.38 383.323   5
   0  10  12 3282.70 479.009  30
   0 -10 -12 3515.37 525.195  34
   0  10  12 3891.68 407.394   8
   0 -10 -13 873.993 228.113   5
   0  10  13 782.439 233.279   8
   0 -10 -13 1276.91 229.431   9
   0  10  13 591.476 257.992  30
   0 -10 -13 652.169 281.167  34
   0 -10 -13 1183.02 189.961  29
   0  10  14 253.592 162.737   8
   0 -10 -14 74.0863 159.672   5
   0  10  14 343.487 274.036  30
   0 -10 -14 204.323 106.976  25
   0 -10 -14 271.417 133.539  29
   0 -10 -14-32.9132 266.738  34
   0 -10 -14 83.3353 135.072   9
   0 -10 -15 452.534 201.634   9
   0  10  15 729.283 314.012  30
   0  10  15 591.919 220.141   8
   0 -10 -15 456.839 259.959  34
   0 -10 -15 759.614 260.168   5
   0 -10 -15 343.905 154.598  29
   0 -10 -15 800.600 145.269  25
   0 -10 -16 6341.91 406.978  29
   0 -10 -16 5430.83 423.113   9
   0 -10 -16 5475.38 344.951  25
   0 -10 -17 1322.70 228.616   9
   0 -10 -17 1330.49 205.879  29
   0 -10 -17 1311.70 220.450  25
   0 -10 -18 4114.84 322.888  25
   0 -10 -18 5144.12 359.278  29
   0 -10 -18 4334.03 362.615   9
   0 -10 -19 6372.26 371.567  25
   0 -10 -19 6297.22 440.111   9
   0 -10 -19 7360.91 415.689  29
   0 -10 -20 225.793 123.208  25
   0 -10 -20-27.6303 120.324  29
   0 -10 -21 759.901 150.507  25
   0 -10 -21 1130.27 181.024  29
   0 -10 -22 624.658 138.390  29
   0 -10 -22 452.452 151.834  26
   0 -10 -23 406.682 112.133  29
   0 -10 -23 204.032 128.235  26
   0 -10 -24 26.8212 108.629  26
   0 -10 -25 176.385 106.539  26
   0 -11  18 21.8802 97.4832  20
   0 -11  17 27.5576 76.0509  17
   0 -11  17 190.564 117.714  20
   0 -11  16 566.085 158.355  20
   0 -11  16 1021.73 158.002  14
   0 -11  16 615.180 125.982  17
   0 -11  15 42.4229 133.630  20
   0 -11  15-100.716 117.721  14
   0 -11  15 111.244 112.067  17
   0 -11  14 375.544 142.371  17
   0 -11  14 45.6513 128.449  14
   0 -11  13 1074.29 165.900  15
   0 -11  13 585.954 162.675  17
   0 -11  13 899.565 211.214  14
   0 -11  12 4126.16 353.816  14
   0 -11  11 161.427 149.045  14
   0 -11  10 2264.85 270.286  14
   0 -11   9 2591.13 293.441  14
   0 -11   8-62.5545 165.521  14
   0 -11   7 484.552 328.762  35
   0 -11   7 261.672 139.702  14
   0  11  -6 1190.81 276.827   1
   0 -11   6 1365.36 403.467  35
   0 -11   6 1162.91 220.830  14
   0  11  -5 504.641 180.791   1
   0 -11   5 818.881 302.964  35
   0 -11   5 513.335 158.842  14
   0  11  -4-329.547 214.568   1
   0 -11   4 667.554 364.543  35
   0  11  -3-86.4769 179.100   1
   0 -11   3-202.638 246.802  35
   0  11  -2 772.185 208.582   1
   0 -11   2 192.023 245.467  35
   0 -11   1 16.5021 271.252  35
   0 -11   1-118.658 116.171   3
   0  11  -1-1.15252 210.502   1
   0 -11   0 2080.62 279.112   3
   0 -11   0 1636.78 381.554  35
   0 -11  -1 2867.66 449.590  35
   0 -11  -1 2887.51 315.065   3
   0  11   1 2858.76 332.137  32
   0 -11  -2 748.347 168.065   3
   0 -11  -2 747.747 233.098   7
   0  11   2 664.619 210.676  32
   0  11   3 807.531 240.831  32
   0 -11  -3 1155.21 290.619   7
   0  11   4 300.267 132.501  32
   0 -11  -4 588.074 248.711   7
   0  11   4 616.871 226.443  36
   0  11   5 208.628 179.825  36
   0  11   5 94.9986 171.903  32
   0 -11  -5-29.2346 157.648   7
   0  11   6 1738.53 281.051  32
   0  11   6 2319.83 312.184  36
   0 -11  -6 2120.36 356.865   7
   0  11   7 873.943 219.325  36
   0 -11  -7 545.300 170.306  34
   0 -11  -7 692.090 247.028   7
   0 -11  -8 1982.06 341.217   7
   0 -11  -8 1057.76 258.752  34
   0  11   8 1955.10 279.385  36
   0 -11  -9 318.997 199.962  34
   0 -11  -9 353.363 243.900   7
   0  11   9 121.543 120.866  36
   0  11   9 231.402 165.349   8
   0  11  10 343.448 172.579  36
   0  11  10 20.4176 144.060   8
   0 -11 -10-0.78653 167.775  34
   0 -11 -11 267.084 137.986  29
   0 -11 -11 207.304 127.072   9
   0  11  11 485.949 183.614   8
   0 -11 -11-12.6473 207.549  34
   0 -11 -12 25.8108 113.773  25
   0 -11 -12 56.6898 226.746  34
   0 -11 -12 86.9351 151.336   9
   0  11  12-100.917 179.389   8
   0 -11 -12 86.8637 113.942  29
   0 -11 -13 1591.62 243.581   9
   0  11  13 1761.06 323.017   8
   0 -11 -13 1177.30 383.450  34
   0 -11 -13 1770.70 226.571  29
   0 -11 -13 1765.79 186.128  25
   0 -11 -14 20.6968 124.553  25
   0  11  14-261.734 204.258   8
   0 -11 -14 44.2202 132.422  29
   0 -11 -14 155.012 154.842   9
   0 -11 -15 8.75473 115.646  25
   0 -11 -15 8.80868 155.283   9
   0 -11 -15-49.2845 137.726  29
   0 -11 -16 1.35128 175.235   9
   0 -11 -16-2.38712 136.126  29
   0 -11 -16 36.7025 122.908  25
   0 -11 -17 1281.40 256.646   9
   0 -11 -17 1604.82 250.050  29
   0 -11 -17 1357.59 210.553  25
   0 -11 -18 3935.89 304.394  25
   0 -11 -18 4148.91 334.896  29
   0 -11 -18 3835.28 356.672   9
   0 -11 -19 2849.15 248.619  25
   0 -11 -19 3046.41 275.591  29
   0 -11 -19 2976.20 310.486   9
   0 -11 -20 1060.06 172.326  25
   0 -11 -20 1330.96 194.634  29
   0 -11 -20 1139.44 222.019  26
   0 -11 -21 1684.54 255.671  26
   0 -11 -21 1296.07 167.831  25
   0 -11 -22-16.9946 103.263  29
   0 -11 -22-121.625 151.562  26
   0 -11 -23 46.4720 93.8535  29
   0 -11 -23 162.626 116.667  26
   0 -11 -24 195.196 118.449  26
   0 -11 -24 68.7902 63.7010  29
   0 -11 -25 176.628 89.9804  26
   0 -12  17 388.405 113.318  20
   0 -12  16 665.307 118.036  14
   0 -12  16 619.272 115.851  17
   0 -12  16 353.425 125.507  20
   0 -12  15 49.8852 113.350  20
   0 -12  15-28.9155 88.4740  17
   0 -12  15 24.2169 104.348  14
   0 -12  14 844.584 170.831  14
   0 -12  14 510.727 144.481  17
   0 -12  13 137.431 142.122  20
   0 -12  13 273.062 116.027  17
   0 -12  13 341.898 150.974  14
   0 -12  12-19.0574 131.904  14
   0 -12  12-23.9419 144.213  20
   0 -12  12-44.4745 111.828  17
   0 -12  11 279.139 139.901  14
   0 -12  11 331.948 129.127  17
   0 -12  10 1122.51 217.457  17
   0 -12  10 1016.27 220.363  20
   0 -12  10 1013.60 221.336  14
   0 -12   9 120.971 153.716  14
   0 -12   9-64.8938 125.759  17
   0 -12   9 247.851 183.923  20
   0 -12   8 551.315 209.663  14
   0 -12   8 231.151 149.114  17
   0 -12   8 249.214 161.278  20
   0 -12   7 2370.06 301.987  14
   0 -12   7 2241.51 316.855  20
   0 -12   6 2410.22 291.607  14
   0 -12   6 2334.53 304.382  20
   0  12  -5 351.943 207.305   1
   0 -12   5 527.797 174.224  20
   0 -12   5 406.131 156.722  17
   0 -12   5 178.102 304.134  35
   0 -12   5 34.0017 157.385  14
   0 -12   4 1246.78 227.183  17
   0 -12   4 1725.34 496.149  35
   0 -12   4 1717.12 253.220  14
   0  12  -4 1136.53 276.035   1
   0 -12   3 2601.34 282.102  14
   0  12  -3 3152.05 430.228   1
   0 -12   3 3169.77 555.979  35
   0 -12   3 2213.37 267.259  17
   0  12  -2 2895.84 427.677   1
   0 -12   2 2290.86 259.591  17
   0 -12   2 2551.43 265.351  14
   0 -12   2 2998.04 522.704  35
   0 -12   1 5244.56 658.358  35
   0  12  -1 6695.85 594.991   1
   0 -12   0 1490.96 317.845   7
   0  12   0 2055.82 380.205   1
   0 -12  -1 266.127 152.577   7
   0 -12  -2 3620.13 461.077   7
   0 -12  -3 7820.62 686.178   7
   0  12   3 6975.88 609.649  36
   0  12   4 1549.82 283.832  36
   0 -12  -4 1087.85 278.594   7
   0 -12  -5 253.034 219.834   7
   0  12   5 408.267 201.811  36
   0  12   6 1464.16 275.641  36
   0 -12  -6 1562.25 338.984   7
   0 -12  -7-72.5092 179.538   7
   0  12   7 313.516 184.489  36
   0  12   8 1475.50 277.053  36
   0 -12  -8 939.344 240.624   7
   0 -12  -9 292.335 142.962  29
   0  12   9 409.636 174.211  36
   0 -12  -9 520.784 226.186   7
   0 -12  -9 82.1078 127.953   9
   0  12   9 668.636 205.183   8
   0 -12 -10 1474.68 225.154   9
   0 -12 -10 1179.67 188.388  29
   0 -12 -10 1006.27 314.185  34
   0 -12 -10 1038.56 149.454  25
   0  12  10 1116.75 220.823  36
   0  12  10 1187.54 247.386   8
   0 -12 -10 1158.66 206.898  26
   0  12  11 2608.50 360.337   8
   0 -12 -11 2173.42 434.189  34
   0 -12 -11 2505.06 286.205   9
   0 -12 -11 1874.95 244.559  26
   0 -12 -11 2578.90 247.477  29
   0 -12 -11 2385.68 216.695  25
   0 -12 -12 2652.49 258.608  29
   0 -12 -12 2105.73 389.675  34
   0 -12 -12 2793.96 233.859  25
   0  12  12 2215.88 353.274   8
   0 -12 -12 1805.82 240.521  26
   0 -12 -12 2489.21 294.027   9
   0 -12 -13 1574.08 206.559  29
   0 -12 -13 1412.92 247.719  26
   0 -12 -13 1558.28 182.458  25
   0 -12 -13 2112.74 296.872   9
   0 -12 -14 1042.24 237.829  26
   0 -12 -14 1465.05 202.125  29
   0 -12 -14 1380.31 241.833   9
   0 -12 -14 1452.51 183.208  25
   0 -12 -15 878.647 219.055  26
   0 -12 -15 813.194 200.791   9
   0 -12 -15 830.289 189.964  29
   0 -12 -15 751.687 162.315  25
   0 -12 -16 8.72877 136.686  29
   0 -12 -16-66.4311 163.994  26
   0 -12 -16-118.290 132.594  25
   0 -12 -16-18.6397 146.733   9
   0 -12 -17 2454.60 240.565  25
   0 -12 -17 2721.77 283.380  29
   0 -12 -17 1995.90 290.152  26
   0 -12 -17 2064.66 289.410   9
   0 -12 -18 6834.81 374.939  25
   0 -12 -18 6973.03 413.740  29
   0 -12 -18 5826.81 450.150   9
   0 -12 -19 7332.25 404.388  29
   0 -12 -19 6256.56 341.973  25
   0 -12 -19 6233.80 437.797   9
   0 -12 -20 1054.65 168.708  25
   0 -12 -20 943.722 213.898  26
   0 -12 -20 1525.28 199.616  29
   0 -12 -21-113.035 107.732  29
   0 -12 -21 39.3126 85.1410  25
   0 -12 -21 63.2637 126.004  26
   0 -12 -22 870.063 189.401  26
   0 -12 -22 762.433 139.396  29
   0 -12 -23 17.0211 64.0702  23
   0 -12 -23 162.430 80.8875  29
   0 -12 -23-46.2482 119.805  26
   0 -12 -24 46.0855 83.1423  26
   0 -13  16-88.1852 62.0795  17
   0 -13  16-135.807 87.2310  20
   0 -13  15 505.115 133.672  20
   0 -13  15 605.337 120.931  14
   0 -13  15 528.712 107.540  17
   0 -13  14 6.06760 103.582  20
   0 -13  14 48.3139 87.7246  17
   0 -13  14-233.157 131.685  14
   0 -13  13-51.4853 94.0957  17
   0 -13  13 203.015 116.134  14
   0 -13  13-137.123 115.192  20
   0 -13  12 422.370 159.505  14
   0 -13  12 567.508 162.123  20
   0 -13  12 497.566 157.392  17
   0 -13  11 1583.35 236.041  14
   0 -13  11 1568.91 225.119  17
   0 -13  11 1503.64 233.456  20
   0 -13  10 2515.08 313.233  20
   0 -13  10 2568.17 276.137  17
   0 -13  10 3449.61 324.836  14
   0 -13   9 269.013 183.215  14
   0 -13   9 109.045 139.601  17
   0 -13   9 186.886 158.259  20
   0 -13   8 24.6656 129.594  17
   0 -13   8-206.594 161.108  14
   0 -13   8 1.98394 165.820  20
   0 -13   7 553.392 172.352  17
   0 -13   7 738.906 203.523  14
   0 -13   7 826.874 225.124  20
   0 -13   6-23.4697 149.727  17
   0 -13   6-154.133 152.958  14
   0 -13   6 177.834 133.122  20
   0 -13   5 1416.98 245.484  14
   0 -13   5 1085.04 215.819  17
   0 -13   4 679.222 200.226  17
   0 -13   4 802.142 222.931  14
   0 -13   3 2176.94 277.884  17
   0 -13   3 1889.21 267.061  14
   0  13  -2 2684.16 406.270   1
   0 -13   2 2361.48 282.160  17
   0 -13   2 2471.83 285.158  14
   0  13  -1 77.2408 183.929   1
   0 -13   1 49.9425 139.408  14
   0 -13   1 122.698 156.704  17
   0 -13   0 359.529 183.297  14
   0  13   0 327.243 200.533   1
   0 -13   0 212.812 130.598  17
   0  13   1 666.344 220.425   1
   0 -13  -1 835.620 194.449  17
   0 -13  -1 676.207 182.225  14
   0 -13  -2 732.978 275.030   7
   0  13   2 813.538 218.285   1
   0 -13  -2 679.443 172.647  17
   0  13   2 520.282 189.093  36
   0 -13  -3 4245.91 282.756  29
   0 -13  -3 4428.48 517.727   7
   0 -13  -3 4281.16 332.784  17
   0  13   3 5119.82 537.430  36
   0 -13  -4 6449.30 625.158   7
   0  13   4 6027.89 567.931  36
   0 -13  -4 6028.95 378.573  17
   0 -13  -4 6049.63 342.056  29
   0 -13  -5 1072.85 163.891  29
   0 -13  -5 1410.07 336.937   7
   0 -13  -5 888.167 167.664  17
   0  13   5 1233.64 269.020  36
   0  13   6 8979.13 668.784  36
   0 -13  -6 7279.63 368.165  25
   0 -13  -6 8795.58 743.669   7
   0 -13  -6 8642.11 461.434   9
   0 -13  -6 7756.68 406.515  29
   0  13   7 13.3139 139.767  36
   0 -13  -7 21.1205 131.312   9
   0 -13  -7 38.5898 127.808  29
   0 -13  -7 166.171 167.830   7
   0 -13  -7 6.55241 118.476  25
   0 -13  -8 125.068 127.663  29
   0 -13  -8 143.406 150.622   9
   0 -13  -8 274.197 127.795  25
   0  13   8 198.568 184.084   8
   0  13   8 110.020 168.379  36
   0  13   9 155.703 151.818  36
   0 -13  -9 233.132 142.228  29
   0 -13  -9 234.566 111.630  25
   0  13   9 177.248 161.221   8
   0 -13  -9 262.966 164.984   9
   0 -13 -10 120.734 117.431  29
   0 -13 -10 263.477 127.465  26
   0 -13 -10-153.686 164.839   9
   0 -13 -10-55.2852 119.700  25
   0 -13 -11 17.2672 141.172  26
   0 -13 -11 95.8747 113.998  25
   0 -13 -11 48.2562 149.676   9
   0 -13 -11 66.0319 136.803  29
   0 -13 -12 246.123 175.187  29
   0 -13 -12 108.140 127.258  26
   0 -13 -12 312.688 187.069   9
   0 -13 -12-56.5598 115.681  25
   0 -13 -13 4322.14 331.044  29
   0 -13 -13 3726.69 374.830   9
   0 -13 -13 4355.45 280.238  25
   0 -13 -14 1685.18 269.082   9
   0 -13 -14 1951.95 207.831  25
   0 -13 -14 1909.99 231.933  29
   0 -13 -14 1614.89 256.166  26
   0 -13 -15 270.499 160.827  26
   0 -13 -15 405.282 166.887  29
   0 -13 -15 537.219 142.142  25
   0 -13 -15 340.327 156.118   9
   0 -13 -16-107.730 144.449  29
   0 -13 -16 10.6268 147.407  26
   0 -13 -16 100.364 110.672  25
   0 -13 -16 244.556 145.027   9
   0 -13 -17 372.932 164.752  29
   0 -13 -17 426.899 133.586  25
   0 -13 -17 81.0114 170.162  26
   0 -13 -17 505.633 194.234   9
   0 -13 -18 32.8796 167.903  26
   0 -13 -18 71.3728 111.361  25
   0 -13 -18-112.556 146.632   9
   0 -13 -18-100.504 141.000  29
   0 -13 -19 68.0939 155.600  26
   0 -13 -19 209.877 129.413  29
   0 -13 -19 116.937 105.206  25
   0 -13 -20 108.034 132.514  26
   0 -13 -20 60.6354 88.2677  25
   0 -13 -20 166.452 129.809  29
   0 -13 -21 705.596 173.469  26
   0 -13 -21 662.007 141.614  29
   0 -13 -22 127.241 94.1355  29
   0 -13 -22-50.3242 106.688  26
   0 -13 -23 105.473 65.3168  23
   0 -13 -23 19.4083 88.1926  26
   0 -13 -23 76.0431 73.5096  29
   0 -14  15 664.469 95.6175  20
   0 -14  14 340.737 106.532  14
   0 -14  14 175.081 80.8717  17
   0 -14  14 295.600 98.7313  20
   0 -14  13 54.0692 90.4421  20
   0 -14  13 138.391 108.593  14
   0 -14  13 200.145 92.1558  17
   0 -14  12 126.794 95.3222  17
   0 -14  12 160.369 106.204  20
   0 -14  12 214.704 129.752  14
   0 -14  11 159.021 122.077  20
   0 -14  11-98.9326 113.282  17
   0 -14  11 306.013 139.328  14
   0 -14  10 44.2818 125.802  17
   0 -14  10-88.1313 128.625  20
   0 -14  10 145.707 140.650  14
   0 -14   9 1514.43 236.046  14
   0 -14   9 832.955 176.021  20
   0 -14   9 1178.72 201.148  17
   0 -14   8 1171.51 205.516  17
   0 -14   8 1124.93 216.133  14
   0 -14   8 1151.37 231.196  20
   0 -14   7-50.2505 148.138  20
   0 -14   7 11.8295 140.732  14
   0 -14   7 302.818 166.449  17
   0 -14   6 96.8466 146.764  17
   0 -14   6 178.647 162.225  14
   0 -14   5 267.230 161.669  17
   0 -14   5 32.4032 152.610  14
   0 -14   4 1076.46 235.501  14
   0 -14   4 873.364 212.461  17
   0 -14   3 1659.85 258.433  17
   0 -14   3 1848.73 247.334  14
   0 -14   2 2940.29 312.656  17
   0 -14   2 3430.03 309.843  14
   0 -14   1 3164.14 316.176  17
   0 -14   1 3476.86 333.343  14
   0 -14   0 513.621 183.482  17
   0 -14   0 575.438 180.641  14
   0 -14  -1 1360.22 208.760  14
   0 -14  -1 1663.05 230.846  17
   0 -14  -2 390.457 153.672  17
   0 -14  -2 249.569 135.567  14
   0 -14  -3 480.503 119.627  29
   0  14   3 106.302 156.536   1
   0 -14  -3 354.871 157.058  17
   0 -14  -4 124.180 129.926  29
   0 -14  -4 99.1157 155.877  17
   0 -14  -5 1595.40 193.172  29
   0 -14  -5 1728.15 218.280  17
   0 -14  -5 1675.94 347.138   7
   0 -14  -6 319.713 126.481  17
   0 -14  -6 346.843 120.194  29
   0 -14  -6 339.087 123.099  25
   0 -14  -7 6998.67 364.918  25
   0 -14  -7 8392.40 460.336   9
   0 -14  -7 7489.96 408.061  29
   0 -14  -8 5500.84 356.288  29
   0 -14  -8 5355.33 318.298  25
   0 -14  -8 5805.22 405.427   9
   0 -14  -9 2148.00 202.574  25
   0 -14  -9 2020.65 227.792  29
   0 -14  -9 2016.02 274.304   9
   0 -14 -10 1383.81 250.351   9
   0 -14 -10 1329.08 194.947  29
   0 -14 -10 1511.25 185.742  25
   0 -14 -11 1478.53 242.779   9
   0 -14 -11 1336.96 177.199  25
   0 -14 -11 1254.01 208.449  29
   0 -14 -11 1017.12 193.500  26
   0 -14 -12 525.232 184.573  26
   0 -14 -12 487.224 120.270  25
   0 -14 -12 441.025 163.445   9
   0 -14 -12 403.482 150.726  29
   0 -14 -13-30.9472 103.395  25
   0 -14 -13-90.7311 146.453   9
   0 -14 -13-149.115 136.621  29
   0 -14 -13-263.506 163.616  26
   0 -14 -14-206.632 166.681   9
   0 -14 -14-49.2774 132.173  26
   0 -14 -14 101.947 141.827  29
   0 -14 -14-20.4298 106.512  25
   0 -14 -15 267.310 198.867   9
   0 -14 -15 34.5234 100.619  25
   0 -14 -15-255.101 154.335  29
   0 -14 -15 100.879 146.702  26
   0 -14 -16 982.561 211.747  26
   0 -14 -16 1240.58 246.790   9
   0 -14 -16 1145.29 161.820  25
   0 -14 -16 1279.80 210.219  29
   0 -14 -17 528.376 134.252  25
   0 -14 -17 444.878 167.183  26
   0 -14 -17 506.826 172.100  29
   0 -14 -17 459.090 191.660   9
   0 -14 -18 1744.30 193.058  25
   0 -14 -18 1426.66 222.519  26
   0 -14 -18 2062.33 236.661  29
   0 -14 -19 1825.86 210.046  29
   0 -14 -19 1567.78 160.974  25
   0 -14 -19 1698.86 230.393  26
   0 -14 -20 806.744 162.772  26
   0 -14 -20 1313.98 165.422  29
   0 -14 -21 891.290 162.802  26
   0 -14 -21 611.662 118.649  29
   0 -14 -22 464.480 101.994  29
   0 -14 -22 356.053 115.910  26
   0 -15  13 25.5417 81.1671  14
   0 -15  13 41.7099 63.8249  17
   0 -15  12-94.0105 80.6020  17
   0 -15  12 155.500 91.4490  14
   0 -15  12 6.47815 69.8842  20
   0 -15  11 810.704 139.341  20
   0 -15  11 864.409 140.975  17
   0 -15  11 1232.72 183.249  14
   0 -15  10 579.047 122.036  17
   0 -15  10 825.905 166.683  14
   0 -15  10 500.806 124.467  20
   0 -15   9 1403.25 193.679  17
   0 -15   9 1782.53 233.139  14
   0 -15   9 1263.97 189.779  20
   0 -15   8 3750.93 306.728  17
   0 -15   8 3820.35 317.547  14
   0 -15   7 7054.61 435.300  17
   0 -15   7 7977.44 467.704  14
   0 -15   6 5399.72 406.668  17
   0 -15   6 6999.86 453.095  14
   0 -15   5 1294.53 228.087  17
   0 -15   5 1513.56 240.086  14
   0 -15   4 753.335 201.129  14
   0 -15   4 687.682 178.443  17
   0 -15   3 160.033 160.066  14
   0 -15   3 165.708 147.807  17
   0 -15   2 305.892 165.197  14
   0 -15   2 133.130 140.715  17
   0 -15   1 1602.19 242.094  17
   0 -15   1 1782.46 245.784  14
   0 -15   0 1248.63 209.989  14
   0 -15   0 1357.32 225.339  17
   0 -15  -1 52.6122 127.030  17
   0 -15  -1 92.9348 142.005  14
   0 -15  -2 454.286 169.911  17
   0 -15  -2 257.138 136.162  14
   0 -15  -3 27.0216 119.791  17
   0 -15  -4 32.2501 124.700  17
   0 -15  -4 193.813 114.861  29
   0 -15  -5 483.291 147.508  25
   0 -15  -5 142.859 117.390  29
   0 -15  -5 311.684 150.413  17
   0 -15  -6 181.755 127.235  29
   0 -15  -6 279.749 138.627  17
   0 -15  -6 305.296 129.829  25
   0 -15  -7 645.950 131.996  25
   0 -15  -7 623.932 143.185  29
   0 -15  -7 313.620 117.373   9
   0 -15  -8 724.043 182.397   9
   0 -15  -8 558.942 148.252  29
   0 -15  -8 579.997 151.251  25
   0 -15  -9 487.849 163.714  29
   0 -15  -9 486.403 140.623  25
   0 -15  -9 446.817 165.907   9
   0 -15 -10 72.0422 138.745   9
   0 -15 -10-18.8334 103.821  25
   0 -15 -10-118.570 126.946  29
   0 -15 -11 210.189 148.051  29
   0 -15 -11 240.018 106.640  25
   0 -15 -11-54.8411 155.622   9
   0 -15 -12-138.352 145.819  29
   0 -15 -12 108.977 155.727   9
   0 -15 -12-55.9933 111.810  25
   0 -15 -13 576.052 163.033  29
   0 -15 -13 572.505 176.906   9
   0 -15 -13 650.523 172.551  26
   0 -15 -13 495.564 123.910  25
   0 -15 -14 1481.30 215.743  29
   0 -15 -14 1225.38 200.929  26
   0 -15 -14 1551.93 173.966  25
   0 -15 -14 1535.13 243.659   9
   0 -15 -15 75.6828 122.732  26
   0 -15 -15 19.8469 98.4708  25
   0 -15 -15-9.55185 136.761  29
   0 -15 -15 4.76071 150.460   9
   0 -15 -16 216.090 103.061  25
   0 -15 -16 445.289 169.607   9
   0 -15 -16 226.220 141.414  26
   0 -15 -17 224.661 151.581  29
   0 -15 -17 167.164 105.219  25
   0 -15 -17-102.004 117.854  26
   0 -15 -18 57.9004 111.922  26
   0 -15 -18-304.670 137.950  29
   0 -15 -19 243.934 113.949  26
   0 -15 -19 384.225 118.011  29
   0 -15 -20 471.987 120.856  26
   0 -15 -20 252.679 101.829  29
   0 -15 -21 433.130 95.2682  29
   0 -15 -21 305.761 99.7266  26
   0 -16  11 103.077 75.9207  17
   0 -16  11 194.789 98.3694  14
   0 -16  10 49.4284 92.7066  14
   0 -16  10 60.3020 80.0228  17
   0 -16   9 91.0071 98.5636  17
   0 -16   9 66.8946 109.729  14
   0 -16   8 214.265 106.675  17
   0 -16   8 20.7425 110.737  14
   0 -16   7 314.558 126.721  17
   0 -16   7 334.432 154.714  14
   0 -16   6 1773.11 225.586  17
   0 -16   6 1758.18 227.795  14
   0 -16   5 1181.41 213.714  17
   0 -16   5 1302.50 218.660  14
   0 -16   4 113.859 135.040  14
   0 -16   4 135.194 127.027  17
   0 -16   3 9.24436 129.647  14
   0 -16   3 20.8259 141.870  17
   0 -16   2 551.755 175.361  17
   0 -16   2 753.301 176.444  14
   0 -16   1 408.299 174.786  14
   0 -16   1 285.120 148.487  17
   0 -16   0 117.864 143.873  17
   0 -16   0 143.438 131.520  14
   0 -16  -1 2924.35 297.036  17
   0 -16  -1 3749.78 318.834  14
   0 -16  -2 6567.87 421.661  17
   0 -16  -3 5466.92 380.760  17
   0 -16  -4 1679.24 191.428  29
   0 -16  -4 1691.93 200.285  25
   0 -16  -4 1375.08 204.641  17
   0 -16  -5 469.862 157.981  29
   0 -16  -5 543.616 125.207  25
   0 -16  -5 568.273 158.550  17
   0 -16  -6 1636.69 211.169  17
   0 -16  -6 1822.40 209.836  25
   0 -16  -6 2107.30 213.175  29
   0 -16  -7 135.349 116.906  29
   0 -16  -7 32.0172 105.079  25
   0 -16  -8 635.098 140.553  25
   0 -16  -8 768.087 184.952   9
   0 -16  -8 706.959 156.525  29
   0 -16  -9 33.5659 121.090  29
   0 -16  -9 230.977 151.185   9
   0 -16  -9-250.751 118.401  25
   0 -16 -10 43.1896 136.889   9
   0 -16 -10 10.8477 94.9303  25
   0 -16 -10 245.522 142.264  29
   0 -16 -11 2814.10 210.732  25
   0 -16 -11 2578.01 277.347   9
   0 -16 -11 2925.64 264.719  29
   0 -16 -12 3076.52 306.082   9
   0 -16 -12 3246.31 221.953  25
   0 -16 -12 3017.69 262.966  29
   0 -16 -13 859.764 151.934  26
   0 -16 -13 680.325 161.650  29
   0 -16 -13 841.658 210.344   9
   0 -16 -13 942.080 148.339  25
   0 -16 -14 1180.72 185.154  29
   0 -16 -14 1238.78 151.903  25
   0 -16 -14 900.345 157.200  26
   0 -16 -15 1594.12 155.712  25
   0 -16 -15 1791.00 210.651  29
   0 -16 -16-38.0744 100.820  26
   0 -16 -16 108.184 138.122  29
   0 -16 -17-37.3758 97.3358  26
   0 -16 -17-22.0474 116.605  29
   0 -16 -18 109.520 101.111  29
   0 -16 -18 127.378 95.3759  26
   0 -16 -19-15.2304 78.6186  26
   0 -16 -19 144.631 92.9371  29
   0 -16 -20 30.1774 77.0907  29
   0 -16 -20 53.2732 69.3278  26
   0 -17   9 570.015 114.649  14
   0 -17   9 212.557 76.8879  17
   0 -17   8 1718.94 172.140  17
   0 -17   8 1729.05 173.415  14
   0 -17   7 812.140 133.971  17
   0 -17   7 844.030 141.479  14
   0 -17   6 541.796 126.859  17
   0 -17   6 607.269 143.534  14
   0 -17   5 193.843 122.160  14
   0 -17   5 250.139 123.473  17
   0 -17   4 1072.80 171.217  14
   0 -17   4 1067.36 184.726  17
   0 -17   3 5392.19 371.092  17
   0 -17   3 5093.28 333.377  14
   0 -17   2 4903.44 353.459  17
   0 -17   2 4554.08 323.459  14
   0 -17   1 419.021 138.875  17
   0 -17   1 233.630 124.514  14
   0 -17   0 131.571 112.665  14
   0 -17   0 404.299 152.924  17
   0 -17  -1 297.652 137.923  14
   0 -17  -1 407.319 144.056  17
   0 -17  -2 147.652 109.876  25
   0 -17  -2 121.290 116.035  17
   0 -17  -3 418.671 134.184  17
   0 -17  -3 526.155 132.972  25
   0 -17  -4 427.467 119.702  25
   0 -17  -4 584.447 159.077  17
   0 -17  -5 547.850 118.305  29
   0 -17  -5 485.725 140.759  17
   0 -17  -5 506.274 128.347  25
   0 -17  -6 125.319 104.181  17
   0 -17  -6 134.171 103.323  29
   0 -17  -6 85.3235 104.010  25
   0 -17  -7 1842.22 192.539  29
   0 -17  -7 1454.14 174.694  25
   0 -17  -8 118.835 109.438  29
   0 -17  -8 38.0278 89.9843  25
   0 -17  -9 41.4224 94.2554  25
   0 -17  -9 154.859 111.342  29
   0 -17 -10 2047.89 205.150  29
   0 -17 -10 1895.77 177.651  25
   0 -17 -11 4023.86 281.400  29
   0 -17 -11 3929.19 234.298  25
   0 -17 -12 2911.96 249.527  29
   0 -17 -12 2918.04 194.814  25
   0 -17 -13 1152.22 129.609  25
   0 -17 -13 1073.07 171.378  29
   0 -17 -14 1700.64 194.557  29
   0 -17 -15 1815.34 199.124  29
   0 -17 -16 1152.78 135.691  26
   0 -17 -16 1166.08 154.929  29
   0 -17 -17 1388.12 132.795  26
   0 -17 -17 2314.71 182.945  29
   0 -17 -18 207.137 69.2741  26
   0 -17 -18 364.781 91.9453  29
   0 -17 -19 44.5248 67.3706  29
   0 -18   6-55.2766 79.0079  14
   0 -18   6-162.699 79.3054  17
   0 -18   5 111.105 81.0717  17
   0 -18   5 72.8189 82.6792  14
   0 -18   4 88.6858 93.9792  17
   0 -18   4 140.469 103.712  14
   0 -18   3 422.055 127.666  17
   0 -18   3 195.539 103.419  14
   0 -18   2 302.135 89.0157  25
   0 -18   2 320.090 153.406  17
   0 -18   2 209.136 91.7809  14
   0 -18   1-48.2709 99.3462  17
   0 -18   1 37.7303 84.4898  25
   0 -18   1-20.3560 91.3488  14
   0 -18   0-189.386 104.013  14
   0 -18   0 0.14098 86.5193  25
   0 -18   0 101.069 110.625  17
   0 -18  -1 204.485 102.900  17
   0 -18  -1 291.537 103.720  25
   0 -18  -2 2544.43 206.086  25
   0 -18  -2 2808.50 238.931  17
   0 -18  -3 4247.11 249.330  25
   0 -18  -3 4880.54 292.832  17
   0 -18  -4 2336.34 209.204  17
   0 -18  -4 1783.91 170.236  25
   0 -18  -5 28.5753 89.5275  17
   0 -18  -5-80.5641 85.4609  25
   0 -18  -6 1046.30 127.925  25
   0 -18  -7 236.207 94.6733  29
   0 -18  -7 143.183 80.1406  25
   0 -18  -8 606.587 121.631  29
   0 -18  -8 564.526 107.455  25
   0 -18  -9 155.858 100.711  29
   0 -18  -9 210.596 88.9228  25
   0 -18 -10 443.475 83.4613  25
   0 -18 -10 402.503 107.496  29
   0 -18 -11 323.175 119.497  29
   0 -18 -12-47.1636 98.5441  29
   0 -18 -13 755.674 139.856  29
   0 -18 -14 3007.92 207.442  29
   0 -18 -15 2511.79 180.079  29
   0 -18 -16 860.896 110.930  29
   0 -18 -17 224.885 70.5537  23
   0 -18 -17 314.678 78.0323  29
   0 -19   3 620.285 100.610  17
   0 -19   3 570.119 79.3055  14
   0 -19   3 541.823 70.9227  25
   0 -19   2 562.941 84.9848  14
   0 -19   2 709.909 88.3322  25
   0 -19   2 778.143 119.517  17
   0 -19   1 2561.81 201.637  17
   0 -19   1 1727.12 123.856  25
   0 -19   0 3153.36 207.885  17
   0 -19   0 2668.87 157.595  25
   0 -19  -1 680.761 115.834  17
   0 -19  -1 356.969 74.4026  25
   0 -19  -2 52.6756 67.2571  25
   0 -19  -2 106.193 81.6464  17
   0 -19  -3 251.979 87.7880  17
   0 -19  -3 131.020 63.9321  25
   0 -19  -4 1030.36 123.174  17
   0 -19  -4 879.049 102.391  25
   0 -19  -5-2.93489 63.5538  25
   0 -19  -6 2208.94 149.901  25
   0 -19  -9 1863.78 143.885  29
   0 -19 -10 2288.02 159.988  29
   0 -19 -11 752.534 107.796  29
   0 -19 -12 1876.53 142.969  29
   0 -19 -13 3168.42 170.086  29
   0 -19 -14 1436.03 114.684  29
   1 -19  -1-6.85624 60.7331  17
   1 -19   0 803.175 104.885  17
   1 -19   1 2892.85 176.280  17
   1 -19   2 925.892 113.378  17
   1 -18 -15 69.0432 66.5967  29
   1 -18 -15 19.6908 60.7910  23
   1 -18 -14 184.131 80.8748  29
   1 -18 -14 134.353 70.5534  23
   1 -18 -13 205.804 83.4816  29
   1 -18 -13-78.4043 87.9194  23
   1 -18 -12 137.058 86.0360  29
   1 -18 -12-47.0631 81.2386  23
   1 -18 -11 4.63584 82.0245  29
   1 -18 -11 88.9524 73.0864  23
   1 -18 -10 458.073 107.726  29
   1 -18  -9-29.0163 86.3960  29
   1 -18  -8 224.745 93.4791  29
   1 -18  -3 2255.92 181.466  17
   1 -18  -2 494.807 116.873  17
   1 -18  -1 446.559 120.483  17
   1 -18  -1 187.639 70.9240  25
   1 -18   0 1449.16 136.019  25
   1 -18   0 1749.65 177.899  14
   1 -18   0 1607.55 172.781  17
   1 -18   1 1779.15 142.717  25
   1 -18   1 2023.67 181.274  14
   1 -18   1 1743.79 181.641  17
   1 -18   2 286.157 121.094  17
   1 -18   2 110.412 94.5029  14
   1 -18   2 204.774 76.6687  25
   1 -18   3 89.7648 60.4552  25
   1 -18   3 264.587 95.1225  14
   1 -18   4 1440.03 114.100  25
   1 -18   4 1584.24 164.083  17
   1 -18   5 2928.23 196.449  17
   1 -18   5 3430.19 208.475  14
   1 -18   6 532.739 99.0788  17
   1 -18   6 372.268 93.5009  14
   1 -17 -18 104.462 64.3455  23
   1 -17 -18 191.976 75.3474  29
   1 -17 -17 55.0316 74.2801  23
   1 -17 -17-45.0088 72.0446  29
   1 -17 -17 4.20988 66.3610  26
   1 -17 -16 289.326 84.8948  26
   1 -17 -16 526.036 115.488  29
   1 -17 -15 1205.05 132.782  26
   1 -17 -15 2234.27 177.773  29
   1 -17 -14 1964.55 189.057  29
   1 -17 -13 437.677 129.682  29
   1 -17 -12-26.2286 107.523  29
   1 -17 -11 528.997 129.014  29
   1 -17 -10 1328.32 161.440  29
   1 -17  -9 1345.38 166.672  29
   1 -17  -8 3659.35 247.308  29
   1 -17  -7 3043.66 221.014  29
   1 -17  -5 364.520 95.5576  25
   1 -17  -4 424.563 113.393  17
   1 -17  -4 274.798 102.378  25
   1 -17  -3 125.568 119.069  17
   1 -17  -3-151.848 100.393  25
   1 -17  -2 173.463 97.1482  17
   1 -17  -2 392.843 113.967  25
   1 -17  -1 121.449 108.372  14
   1 -17  -1-62.1456 97.3952  25
   1 -17  -1-30.2075 99.2705  17
   1 -17   0 1024.80 170.636  17
   1 -17   0 814.214 130.578  25
   1 -17   0 1055.77 166.701  14
   1 -17   1 740.979 159.842  17
   1 -17   1 666.811 147.464  14
   1 -17   2 1534.67 199.294  14
   1 -17   2 1236.15 192.398  17
   1 -17   3 488.962 130.289  14
   1 -17   3 635.008 164.508  17
   1 -17   4 784.762 152.755  14
   1 -17   4 934.786 188.205  17
   1 -17   5 1186.78 175.188  17
   1 -17   5 2076.75 208.035  14
   1 -17   6 556.911 120.234  17
   1 -17   6 787.427 145.442  14
   1 -17   7 16.0072 103.839  14
   1 -17   7 117.853 90.4464  17
   1 -17   8-21.0262 74.9239  17
   1 -17   8 1.13911 88.4044  14
   1 -17   9 209.078 88.8043  14
   1 -17   9 67.5045 65.8376  17
   1 -16 -19 601.845 100.232  29
   1 -16 -19 615.233 107.891  26
   1 -16 -19 692.285 107.556  23
   1 -16 -18 871.180 128.992  29
   1 -16 -18 587.157 115.726  26
   1 -16 -17 1023.45 149.371  29
   1 -16 -17 880.680 143.207  26
   1 -16 -16 150.975 114.053  26
   1 -16 -16 25.1596 104.931  29
   1 -16 -15-18.7934 118.513  26
   1 -16 -15 390.525 133.098  29
   1 -16 -14 183.293 105.200  26
   1 -16 -14 382.518 135.832  29
   1 -16 -13 105.568 120.351  29
   1 -16 -13 188.292 105.299  26
   1 -16 -12 201.910 128.518  29
   1 -16 -12 242.449 118.638  26
   1 -16 -11 1077.50 173.582  29
   1 -16 -10 2035.04 208.652  29
   1 -16  -9 1084.66 182.588  29
   1 -16  -8 269.170 112.234  29
   1 -16  -7 405.870 136.794  29
   1 -16  -7 278.212 120.082  25
   1 -16  -6 2189.83 204.167  29
   1 -16  -6 2192.87 192.099  25
   1 -16  -5 2222.90 202.382  25
   1 -16  -4 1230.20 166.225  25
   1 -16  -4 1342.29 192.756  17
   1 -16  -3 372.731 148.868  17
   1 -16  -3 379.693 119.900  25
   1 -16  -2 156.924 124.628  17
   1 -16  -2-199.234 120.139  25
   1 -16  -1 119.362 129.210  17
   1 -16  -1 35.0744 128.498  14
   1 -16   0 113.974 116.174  17
   1 -16   0-1.89023 115.918  14
   1 -16   1-42.8029 123.509  17
   1 -16   1 348.962 134.640  14
   1 -16   2 2748.75 268.163  14
   1 -16   2 2127.23 240.506  17
   1 -16   3 2836.36 276.921  14
   1 -16   3 2343.52 269.025  17
   1 -16   4 1852.85 263.791  17
   1 -16   4 1707.48 231.380  14
   1 -16   5 305.993 132.497  17
   1 -16   5 126.979 119.471  14
   1 -16   6-105.267 116.910  17
   1 -16   6 85.8385 119.349  14
   1 -16   7 78.1315 112.281  17
   1 -16   7 203.216 133.801  14
   1 -16   8 96.5373 119.543  14
   1 -16   8 134.073 114.132  17
   1 -16   9 240.405 118.274  14
   1 -16   9 200.763 97.8667  17
   1 -16  10 67.1412 82.6307  17
   1 -16  10 0.15513 90.5536  14
   1 -16  11 86.2645 91.3768  14
   1 -16  11 20.5887 67.4545  17
   1 -15 -21 107.645 63.8861  23
   1 -15 -21 16.2602 72.2496  26
   1 -15 -21 173.103 78.0741  29
   1 -15 -20 989.071 138.939  26
   1 -15 -20 664.466 115.187  29
   1 -15 -19 1269.86 152.176  29
   1 -15 -19 1067.19 158.163  26
   1 -15 -18 1056.37 169.090  26
   1 -15 -18 1594.74 175.978  29
   1 -15 -17 1561.99 204.336  26
   1 -15 -17 2192.72 214.696  29
   1 -15 -16 369.225 151.236  26
   1 -15 -16 449.468 145.447  29
   1 -15 -15 288.459 135.805  26
   1 -15 -15-14.7118 134.244  29
   1 -15 -14 10.5968 129.967  29
   1 -15 -14-157.363 134.913  26
   1 -15 -13 277.224 140.449  26
   1 -15 -13 534.850 165.201  29
   1 -15 -12 33.5481 124.074  26
   1 -15 -12 297.750 158.791  29
   1 -15 -11 247.844 135.948  29
   1 -15 -11 404.890 175.150   9
   1 -15 -10 1391.96 240.124   9
   1 -15 -10 1198.38 193.606  29
   1 -15 -10 1022.17 174.928  26
   1 -15  -9 251.208 154.847   9
   1 -15  -9 524.469 158.978  29
   1 -15  -8 921.687 174.665  29
   1 -15  -8 576.228 124.480  25
   1 -15  -7 816.890 138.542  25
   1 -15  -7 1115.45 178.334  29
   1 -15  -6 9.69454 98.2235  25
   1 -15  -6 124.007 114.756  29
   1 -15  -5 4444.59 295.454  25
   1 -15  -5 5094.13 314.158  29
   1 -15  -4 1101.16 162.620  25
   1 -15  -4 1151.27 182.417  17
   1 -15  -3 323.478 121.712  17
   1 -15  -2 1169.62 195.127  14
   1 -15  -2 912.919 195.428  17
   1 -15  -1 376.965 137.896  17
   1 -15  -1 604.348 159.451  14
   1 -15   0-6.17137 128.336  17
   1 -15   0 343.033 179.429  14
   1 -15   1 650.175 181.454  17
   1 -15   1 834.382 181.937  14
   1 -15   2 852.040 195.558  14
   1 -15   2 367.924 156.536  17
   1 -15   3 312.917 162.909  17
   1 -15   3 370.394 159.893  14
   1 -15   4 33.9878 140.862  14
   1 -15   4 256.265 151.469  17
   1 -15   5 871.667 192.108  14
   1 -15   5 860.094 201.516  17
   1 -15   6 655.458 174.055  17
   1 -15   6 959.612 191.962  14
   1 -15   7 4686.77 354.951  14
   1 -15   7 3889.63 321.621  17
   1 -15   8 5474.28 381.119  14
   1 -15   8 5060.59 355.401  17
   1 -15   9 4402.32 324.652  14
   1 -15   9 3852.99 288.420  17
   1 -15  10 893.176 156.142  17
   1 -15  10 757.483 158.903  14
   1 -15  11 248.832 104.600  17
   1 -15  11-54.9103 104.511  14
   1 -15  12 141.831 100.478  14
   1 -15  12 115.838 79.6441  17
   1 -15  13 133.340 66.8408  17
   1 -15  13 276.240 92.1015  14
   1 -14 -22 2712.21 171.890  29
   1 -14 -22 2781.27 196.394  26
   1 -14 -22 3220.92 154.260  23
   1 -14 -21 118.651 91.5655  29
   1 -14 -21 135.526 93.1414  26
   1 -14 -21 188.739 81.5571  23
   1 -14 -20 453.742 115.891  29
   1 -14 -20 500.415 135.990  26
   1 -14 -19 3492.88 290.489  26
   1 -14 -19 5700.21 308.612  29
   1 -14 -18 6227.01 346.371  29
   1 -14 -18 5157.16 366.471  26
   1 -14 -17 2250.61 243.927  29
   1 -14 -17 1609.25 238.669  26
   1 -14 -16 1910.86 238.366  29
   1 -14 -16 1630.68 232.995  26
   1 -14 -15 200.383 154.229  29
   1 -14 -15 314.992 161.080  26
   1 -14 -14 611.450 194.843   9
   1 -14 -14 672.934 182.443  26
   1 -14 -14 919.865 187.095  29
   1 -14 -13 446.371 208.450   9
   1 -14 -13 115.750 132.830  26
   1 -14 -13 449.667 167.004  29
   1 -14 -12-24.5640 129.579  29
   1 -14 -12-98.4339 167.593   9
   1 -14 -12 42.6775 136.119  26
   1 -14 -11 188.842 139.506  26
   1 -14 -11-102.639 133.604  29
   1 -14 -11 363.680 171.066   9
   1 -14 -10 132.819 132.045  29
   1 -14 -10-4.31856 130.780  26
   1 -14 -10-145.412 173.735   9
   1 -14  -9 15.8273 109.817  25
   1 -14  -9-21.9871 146.615   9
   1 -14  -9 21.5711 115.719  29
   1 -14  -9-262.154 152.006  26
   1 -14  -8 41.2458 101.679  25
   1 -14  -8 24.4989 153.924   9
   1 -14  -8-85.1005 129.028  29
   1 -14  -7 2476.48 215.925  25
   1 -14  -7 2714.41 285.819   9
   1 -14  -7 2490.63 245.125  29
   1 -14  -6 2961.48 289.233   9
   1 -14  -6 2830.07 253.739  29
   1 -14  -6 2751.20 228.803  25
   1 -14  -5 402.577 122.269  29
   1 -14  -5 511.132 140.083  25
   1 -14  -4 285.740 133.583  17
   1 -14  -3 1789.29 222.774  17
   1 -14  -2 6452.39 420.496  17
   1 -14  -2 6762.88 422.776  14
   1 -14  -1 76.6389 165.234  14
   1 -14  -1 107.333 124.798  17
   1 -14   0 63.1767 136.329  17
   1 -14   0-134.960 164.366  14
   1 -14   1 366.781 169.319  14
   1 -14   1 357.713 167.193  17
   1 -14   2 219.625 143.666  14
   1 -14   2 269.621 150.286  17
   1 -14   3 3567.64 346.072  14
   1 -14   3 3423.88 331.438  17
   1 -14   4 1827.17 261.323  17
   1 -14   4 1986.07 256.337  14
   1 -14   5 4960.02 391.742  14
   1 -14   5 4916.73 410.274  17
   1 -14   6 2917.12 312.200  17
   1 -14   6 3462.92 342.426  14
   1 -14   7-243.104 155.288  17
   1 -14   7 69.5147 161.993  14
   1 -14   8 831.643 197.270  14
   1 -14   8 711.245 172.401  17
   1 -14   9 132.947 122.997  17
   1 -14   9 44.1863 130.291  14
   1 -14  10 310.828 171.520  14
   1 -14  10 108.042 120.868  17
   1 -14  10 29.0926 105.897  20
   1 -14  11 197.189 121.689  17
   1 -14  11 80.3508 111.053  20
   1 -14  11 150.789 137.977  14
   1 -14  12-64.5915 92.4543  20
   1 -14  12 92.4194 120.384  14
   1 -14  12 7.07764 97.8656  17
   1 -14  13 319.494 118.457  14
   1 -14  13 127.263 93.2808  20
   1 -14  13 164.107 95.5983  17
   1 -14  14 50.0850 85.8708  14
   1 -14  14-117.360 84.1144  17
   1 -14  14-14.7291 70.1067  20
   1 -14  15-40.3254 53.6992  17
   1 -13 -23 46.4188 77.5419  26
   1 -13 -23 35.6928 60.9961  29
   1 -13 -22-57.9927 97.7804  26
   1 -13 -22-29.8687 83.8070  29
   1 -13 -22 235.727 75.2964  23
   1 -13 -21-76.5482 113.603  26
   1 -13 -21 209.428 102.019  29
   1 -13 -20-141.909 112.715  26
   1 -13 -20 107.443 117.923  29
   1 -13 -19 3.20112 123.517  29
   1 -13 -19-90.5818 136.257  26
   1 -13 -18 73.3368 123.689  29
   1 -13 -18-21.5671 153.071  26
   1 -13 -17-43.8533 160.764  26
   1 -13 -17 64.4738 138.291  29
   1 -13 -16 189.577 150.870  26
   1 -13 -16 473.031 178.919  29
   1 -13 -16 359.940 200.221   9
   1 -13 -15-137.371 178.826  26
   1 -13 -15-26.5590 162.369   9
   1 -13 -15 63.2503 154.000  29
   1 -13 -14 939.137 200.583  29
   1 -13 -14 459.155 178.078   9
   1 -13 -14 510.345 180.921  26
   1 -13 -13 209.778 148.502  26
   1 -13 -13 187.826 150.365   9
   1 -13 -13 335.898 161.948  29
   1 -13 -12 1292.78 246.973   9
   1 -13 -12 972.639 192.371  29
   1 -13 -12 511.750 172.831  26
   1 -13 -11 384.298 162.126  29
   1 -13 -11 235.070 142.961  26
   1 -13 -11 67.6407 151.426   9
   1 -13 -10 226.643 151.349   9
   1 -13 -10 328.902 163.508  26
   1 -13 -10 266.536 141.146  29
   1 -13  -9 429.794 177.310  26
   1 -13  -9 341.135 134.160  29
   1 -13  -9 713.383 199.403   9
   1 -13  -9 573.969 130.088  25
   1 -13  -8-65.3565 151.270   9
   1 -13  -8 323.357 112.312  25
   1 -13  -8 152.996 118.119  26
  -1  13   8 53.1010 144.479   8
   1 -13  -8 147.154 137.973  29
  -1  13   7 505.041 151.687   8
   1 -13  -7 628.081 140.075  25
   1 -13  -7 565.997 126.583  29
   1 -13  -7 761.636 195.999   9
   1 -13  -6 237.728 171.991   7
  -1  13   6 142.750 132.915   8
   1 -13  -6 145.285 108.237  25
  -1  13   6 123.481 145.946  36
   1 -13  -6 55.0535 125.319   9
   1 -13  -6 208.916 126.427  29
  -1  13   5 589.658 165.061  36
   1 -13  -5 942.358 289.355   7
  -1  13   5 615.116 184.734   8
   1 -13  -5 1074.82 154.410  29
  -1  13   4 2963.80 336.419   8
   1 -13  -4 2645.06 260.027  17
   1 -13  -4 3473.37 264.639  29
  -1  13   4 3017.06 414.837  36
  -1  13   3 425.205 229.112  36
   1 -13  -3 680.357 162.278  17
  -1  13   3 593.045 206.181   1
  -1  13   2 1861.51 294.330   1
   1 -13  -2 1622.95 216.647  14
  -1  13   2 1477.73 303.167  36
   1 -13  -2 1562.37 223.241  17
   1 -13  -1 4459.04 346.632  17
  -1  13   1 5420.99 508.652   1
   1 -13  -1 4485.95 354.493  14
  -1  13   1 3783.14 476.012  36
   1 -13   0 3536.96 322.616  17
   1 -13   0 3725.04 317.679  14
   1 -13   1 29.8605 136.686  17
   1 -13   1 304.282 155.764  14
  -1  13  -1 194.496 171.978   1
   1 -13   2 285.032 164.422  14
  -1  13  -2 85.5814 197.383   1
   1 -13   2 236.337 148.782  11
   1 -13   2 420.329 279.724  35
   1 -13   2 148.343 138.238  17
   1 -13   3 388.562 177.245  17
   1 -13   3 293.641 153.768  14
   1 -13   4 420.291 167.510  14
   1 -13   4 256.227 152.505  17
   1 -13   5 3907.55 367.251  14
   1 -13   5 3680.87 365.575  17
   1 -13   6 568.295 193.450  14
   1 -13   6 349.831 179.165  17
   1 -13   7-10.9804 143.803  14
   1 -13   7-22.7273 135.542  17
   1 -13   8 94.2292 131.003  17
   1 -13   8 193.861 150.295  14
   1 -13   8-22.9859 171.591  20
   1 -13   9 111.086 139.959  14
   1 -13   9 136.699 120.277  17
   1 -13   9-262.286 166.021  20
   1 -13  10 787.831 186.931  20
   1 -13  10 591.472 189.581  14
   1 -13  10 406.613 135.466  17
   1 -13  11 650.140 163.209  17
   1 -13  11 283.094 152.272  20
   1 -13  11 488.483 169.436  14
   1 -13  12 467.245 141.344  17
   1 -13  12 451.994 165.888  20
   1 -13  12 589.004 159.177  14
   1 -13  13 7.57691 106.571  20
   1 -13  13 282.172 126.412  14
   1 -13  13 135.549 103.416  17
   1 -13  14 233.527 102.481  17
   1 -13  14 136.879 118.388  20
   1 -13  14 130.464 111.459  14
   1 -13  15 78.4228 88.7480  14
   1 -13  15-69.8974 86.1181  20
   1 -13  15 97.0516 76.7528  17
   1 -13  16-36.9603 63.3781  17
   1 -13  16 15.0374 69.2679  14
   1 -13  16 26.4623 67.9404  20
   1 -12 -23 125.090 94.8652  26
  -1  12  23 45.0592 72.0036  10
   1 -12 -23-56.7111 76.8965  29
   1 -12 -23 10.8016 57.0275  23
   1 -12 -22 137.523 93.4164  29
   1 -12 -22 131.938 75.2804  23
   1 -12 -21 4.45500 100.066  29
   1 -12 -21 77.7069 126.654  26
   1 -12 -20 405.527 136.687  29
   1 -12 -20 325.234 154.614  26
   1 -12 -19 7519.29 397.238  29
   1 -12 -19 5885.62 426.569  26
   1 -12 -18 4551.47 394.998  26
   1 -12 -18 5622.13 372.913  29
   1 -12 -17 1077.41 223.923  26
   1 -12 -17 1245.35 212.812  29
   1 -12 -17 1392.80 255.060   9
   1 -12 -16 255.424 165.038  29
   1 -12 -16-155.102 165.582   9
   1 -12 -16 387.771 182.126  26
   1 -12 -15-132.264 157.431  29
   1 -12 -15-11.9279 159.032   9
   1 -12 -15 161.904 174.245  26
   1 -12 -14 1813.60 265.496  26
   1 -12 -14 2406.32 264.792  29
   1 -12 -14 2462.45 315.480   9
   1 -12 -13 5395.65 366.924  29
   1 -12 -13 5328.75 434.226   9
   1 -12 -13 4622.36 393.453  26
   1 -12 -12 4961.60 399.185   9
   1 -12 -12 4711.13 351.807  29
   1 -12 -12 4164.53 364.145  26
   1 -12 -11 2807.22 459.624  34
   1 -12 -11 2762.93 303.517   9
   1 -12 -11 3387.91 286.317  29
   1 -12 -11 2544.80 284.347  26
  -1  12  11 2399.99 308.342   8
   1 -12 -10 1177.67 211.717  26
   1 -12 -10 1616.26 237.839   9
   1 -12 -10 1271.01 196.811  29
  -1  12  10 1257.39 257.277   8
   1 -12 -10 986.417 309.796  34
   1 -12  -9 425.416 147.752  26
   1 -12  -9 293.762 153.807   9
  -1  12   9 218.673 153.411   8
   1 -12  -9 174.759 120.819  29
  -1  12   8 276.658 116.169  36
   1 -12  -8 75.2992 119.536  29
   1 -12  -8 35.4948 123.533  26
  -1  12   8 395.171 199.292   8
   1 -12  -8 110.063 125.131   9
  -1  12   7 469.109 179.411   8
  -1  12   7 514.036 199.634  36
   1 -12  -7 270.772 230.406   7
   1 -12  -6 418.374 217.114   7
  -1  12   6 556.710 198.016  36
  -1  12   6 434.126 170.165   8
  -1  12   5 432.165 193.743  36
   1 -12  -5 199.367 195.115   7
  -1  12   5 151.584 127.539   8
  -1  12   4 2387.80 321.156   1
   1 -12  -4 2143.63 354.601   7
  -1  12   4 2573.99 366.037  36
   1 -12  -3 6557.57 599.055   7
  -1  12   3 6589.58 577.366  36
  -1  12   3 6509.69 548.954   1
  -1  12   2 4191.00 465.042  36
   1 -12  -2 4816.59 499.369   7
  -1  12   2 4833.17 468.063   1
   1 -12  -2 4923.88 611.687  35
  -1  12   1 4762.08 489.412   1
   1 -12  -1 4426.09 592.247  35
  -1  12   0 940.235 244.849   1
   1 -12   0 1659.62 443.778  35
  -1  12  -1 263.350 182.377   1
   1 -12   1 642.431 311.465  35
   1 -12   1 579.728 170.093  14
   1 -12   1 600.566 161.602  17
   1 -12   2 1198.49 415.983  35
   1 -12   2 1196.86 197.092  11
  -1  12  -2 1233.16 272.837   1
   1 -12   2 810.149 175.033  17
   1 -12   2 999.359 208.938  14
   1 -12   3 796.096 188.618  14
   1 -12   3 644.501 176.909  17
   1 -12   3 458.520 126.819  11
  -1  12  -3 748.848 256.046   1
   1 -12   3 290.297 283.547  35
   1 -12   4 355.555 136.328  11
   1 -12   4 173.255 252.369  35
   1 -12   4 142.927 155.881  14
  -1  12  -4-270.048 203.939   1
   1 -12   5-178.641 391.666  35
   1 -12   5-15.2100 138.158  14
  -1  12  -5 253.928 210.259   1
   1 -12   6 154.345 159.092  14
   1 -12   7 209.723 186.655  14
   1 -12   7 187.745 143.814  20
   1 -12   8-157.721 157.201  14
   1 -12   8-10.4233 161.498  20
   1 -12   9 1207.76 232.270  14
   1 -12  10 2465.54 306.911  14
   1 -12  11-91.1273 138.632  14
   1 -12  11 108.131 108.212  15
   1 -12  11-41.7960 135.086  20
   1 -12  12 233.776 110.097  15
   1 -12  12 104.289 114.834  17
   1 -12  12 385.327 141.571  14
   1 -12  12 140.732 136.047  20
   1 -12  13-121.081 122.295  15
   1 -12  13 201.410 155.816  20
   1 -12  13 81.7769 126.232  14
   1 -12  13-126.059 121.413  17
   1 -12  14 91.2996 103.253  17
   1 -12  14 312.604 144.044  14
   1 -12  14-44.0552 110.075  20
   1 -12  15-243.417 111.909  17
   1 -12  15-172.793 107.544  20
   1 -12  15-20.8126 101.281  14
   1 -12  16 414.714 121.546  20
   1 -12  16 393.533 103.743  17
   1 -12  16 681.742 123.403  14
   1 -12  17 759.953 103.005  17
   1 -12  17 930.801 140.153  20
  -1  11  24 690.745 120.876  10
   1 -11 -24 780.832 127.070  26
   1 -11 -23 702.571 124.593  29
   1 -11 -23 1000.62 161.589  26
   1 -11 -22 30.5598 83.8090  23
   1 -11 -22 222.606 116.435  29
   1 -11 -22 5.96655 112.742  26
   1 -11 -21-21.4891 107.342  29
   1 -11 -21 72.0762 140.143  26
   1 -11 -20 299.921 141.003  26
   1 -11 -20 91.6282 117.529  29
   1 -11 -19 38.1471 144.931  26
   1 -11 -19-85.6692 135.950  29
   1 -11 -18 54.7663 143.881  29
   1 -11 -18 78.9084 183.848  26
   1 -11 -17-35.6722 161.188  29
   1 -11 -17 8.80313 156.203   9
   1 -11 -17-57.4444 134.281  25
   1 -11 -17 311.407 203.995  26
   1 -11 -16 239.930 123.626  25
   1 -11 -16-224.451 180.345   9
   1 -11 -16-29.1272 137.757  29
   1 -11 -16-344.292 183.714  26
   1 -11 -15 52.4959 149.343  26
   1 -11 -15 103.742 152.415   9
   1 -11 -15 80.9225 109.434  25
   1 -11 -15 156.240 146.626  29
   1 -11 -14-9.42251 140.928  29
   1 -11 -14-79.4768 164.440   9
   1 -11 -14 246.070 172.814  26
  -1  11  13-69.7026 179.671   8
   1 -11 -13-42.9488 161.042   9
   1 -11 -13 442.464 296.799  34
   1 -11 -13 147.330 122.131  29
   1 -11 -13 243.432 164.479  26
  -1  11  12 746.768 233.124   8
   1 -11 -12 489.071 190.519  26
   1 -11 -12 98.0144 236.654  34
   1 -11 -12 535.252 165.514  29
   1 -11 -12 329.039 138.444   9
  -1  11  11 234.476 182.067   8
   1 -11 -11 353.611 151.544  29
   1 -11 -11 43.8579 128.475   9
   1 -11 -11 124.131 131.353  26
   1 -11 -11-28.2197 238.835  34
   1 -11 -10 114.511 191.426  34
   1 -11 -10 95.8927 129.613  29
   1 -11 -10 17.9858 128.534   9
  -1  11  10-56.7299 168.165   8
  -1  11   9 2639.16 301.550  36
  -1  11   9 2363.96 314.719   8
   1 -11  -9 2110.02 377.576  34
  -1  11   8 2154.63 273.995  36
  -1  11   8 1906.22 291.618   8
   1 -11  -8 1918.79 372.474  34
   1 -11  -7 212.384 167.605   7
  -1  11   7 104.112 113.689  36
  -1  11   7 249.621 158.793   8
   1 -11  -7 240.121 215.169  34
   1 -11  -6 935.117 209.538   7
  -1  11   6 761.803 159.252   8
  -1  11   6 899.951 175.981  36
   1 -11  -5 3145.00 433.236   7
  -1  11   5 2912.57 352.524  36
   1 -11  -4 815.365 227.145   7
  -1  11   4 849.177 210.389  36
   1 -11  -3 367.821 231.909   6
   1 -11  -3 457.967 197.431   7
  -1  11   3 172.515 118.270  36
   1 -11  -3 516.875 283.532  35
   1 -11  -2 6391.39 647.654  35
  -1  11   2 5696.93 497.611   1
   1 -11  -2 6445.67 699.316   6
   1 -11  -2 6177.90 535.829   7
   1 -11  -1 570.608 258.221   6
  -1  11   1 782.538 215.372   1
   1 -11  -1 838.853 225.621   7
   1 -11   0 4852.37 608.003   6
   1 -11   0 4118.62 444.738   7
  -1  11   0 4569.07 465.690   1
   1 -11   0 4633.44 567.666  35
  -1  11  -1-154.070 195.427   1
   1 -11   1 83.4701 234.388  35
   1 -11   1 55.7635 294.432   6
   1 -11   2 254.642 274.752   6
   1 -11   2 330.886 286.507  35
  -1  11  -2 106.923 187.044   1
   1 -11   3 852.596 391.710  35
  -1  11  -3 277.924 178.465   1
  -1  11  -4 450.336 221.947   1
   1 -11   4 385.964 353.285  35
   1 -11   5 365.583 324.621  35
   1 -11   5-89.6523 172.389  14
   1 -11   5 90.7290 125.771  11
  -1  11  -5-131.216 211.434   1
   1 -11   6 293.736 154.210  14
  -1  11  -6 391.062 216.858   1
   1 -11   6 227.578 240.690  35
  -1  11  -7 260.360 188.901   1
   1 -11   7 198.562 146.218  14
   1 -11   7 3.26135 295.000  35
   1 -11   8 149.615 144.268  14
   1 -11   9 1151.71 236.992  14
   1 -11   9 1026.28 161.618  15
   1 -11  10 5160.37 416.108  14
   1 -11  10 4252.96 301.727  15
   1 -11  11 228.372 138.233  15
   1 -11  11 437.522 164.897  14
   1 -11  12-184.497 127.325  15
   1 -11  12 75.8322 158.221  14
   1 -11  13 296.656 136.105  15
   1 -11  13 429.597 173.517  14
   1 -11  14 486.034 133.436  15
   1 -11  14 602.865 169.003  14
   1 -11  15 339.530 131.096  17
   1 -11  15 294.707 133.617  14
   1 -11  16 210.064 112.434  17
   1 -11  16-108.198 105.276  14
   1 -11  16 59.1590 116.307  20
   1 -11  17 136.390 108.729  20
   1 -11  17 64.5949 80.7021  17
   1 -11  18 66.4852 89.0559  20
   1 -11  18 217.261 67.1019  17
   1 -11  19 142.890 88.0602  20
  -1  10  25 151.845 90.5683  10
   1 -10 -25 115.301 75.4068  26
   1 -10 -24 213.666 98.8483  26
   1 -10 -23 631.115 124.172  29
   1 -10 -23 555.375 152.040  26
   1 -10 -22-28.5142 79.1605  23
   1 -10 -22-69.1092 123.976  26
   1 -10 -22 211.555 114.831  29
   1 -10 -21 1203.78 213.573  26
   1 -10 -21 1299.80 193.249  29
   1 -10 -20 3278.32 275.507  29
   1 -10 -20 2013.33 275.118  26
   1 -10 -19 8526.87 445.394  29
   1 -10 -19 7651.19 368.734  25
   1 -10 -18 842.078 148.089  25
   1 -10 -18 1067.61 197.400  29
   1 -10 -17 169.658 166.408  29
   1 -10 -17 401.674 135.354  25
   1 -10 -17 238.712 158.168   9
   1 -10 -16 2687.36 241.557  25
   1 -10 -16 2821.86 290.238  29
   1 -10 -16 2528.81 311.533   9
   1 -10 -15 890.875 209.344  29
   1 -10 -15 807.189 202.959   9
   1 -10 -15 848.705 152.318  25
   1 -10 -14 378.626 129.518  25
  -1  10  14 369.297 200.239  30
   1 -10 -14 64.6299 205.963  34
   1 -10 -14 25.9668 138.224   9
  -1  10  14 443.409 180.142   8
   1 -10 -14-90.5481 151.809   5
   1 -10 -14 358.349 131.235  29
   1 -10 -13 798.162 208.960   5
   1 -10 -13 946.908 190.053  29
  -1  10  13 788.236 219.917   8
   1 -10 -13 954.327 208.149   9
   1 -10 -13 1214.57 355.546  34
  -1  10  13 1120.49 341.915  30
   1 -10 -12 80.2720 123.292  29
  -1  10  12 188.209 272.500  30
   1 -10 -12 21.2983 141.487   9
   1 -10 -12-193.845 141.165   5
   1 -10 -12 214.750 220.368  34
  -1  10  12 34.2463 174.393   8
  -1  10  11 377.187 168.253  30
   1 -10 -11 505.435 266.059  34
  -1  10  10 971.301 234.863   8
   1 -10 -10 373.032 173.920  34
  -1  10   9 1563.41 238.712  36
  -1  10   9 1545.13 264.297   8
   1 -10  -9 1389.45 321.750  34
   1 -10  -8 132.530 218.772  34
  -1  10   8 375.570 132.127  36
  -1  10   8 763.236 218.370   8
   1 -10  -7 490.351 236.155   7
   1 -10  -7 684.217 234.513  34
  -1  10   7 632.624 174.276  36
  -1  10   7 816.851 185.397   8
   1 -10  -6 235.116 161.453   7
  -1  10   6 265.265 131.556  36
   1 -10  -6 67.8671 139.667  34
   1 -10  -5 2538.10 337.526  34
   1 -10  -5 2442.00 353.222   6
   1 -10  -5 2240.67 345.159   7
  -1  10   5 2612.21 330.211  36
  -1  10   4 14421.0 742.322  32
  -1  10   4 16579.9 820.839  36
   1 -10  -4 16519.2 884.857   7
   1 -10  -4 15739.6 891.819  35
   1 -10  -4 15953.9 942.057   6
   1 -10  -3 6750.64 625.854   6
   1 -10  -3 6541.58 550.405   7
   1 -10  -3 7306.56 625.493  35
   1 -10  -2 777.342 208.828   7
   1 -10  -2 851.861 244.206   6
   1 -10  -2 741.343 243.602  35
   1 -10  -1 207.885 162.617   7
   1 -10  -1 411.313 219.700   6
   1 -10  -1 232.000 187.622  35
   1 -10   0 10123.5 798.528  35
   1 -10   0 8218.80 755.352   6
   1 -10   0 8842.32 606.014   7
  -1  10   0 9081.59 620.875   1
  -1  10  -1 12954.1 759.035   1
   1 -10   1 13020.1 935.140  35
   1 -10   1 12313.4 947.485   6
   1 -10   2 852.119 293.008   6
  -1  10  -2 832.600 231.520   1
   1 -10   2 893.050 308.948  35
   1 -10   3 300.381 261.659  35
   1 -10   3 471.969 264.810   6
  -1  10  -3 876.206 244.435   1
  -1  10  -4 1866.83 315.051   1
   1 -10   4 1894.18 405.365  35
   1 -10   4 1744.09 394.861   6
   1 -10   5 162.710 247.905   6
   1 -10   5-25.4350 237.781  35
  -1  10  -5 250.369 187.313   1
   1 -10   6 344.240 292.746  35
  -1  10  -6 942.229 277.578   1
   1 -10   7 668.746 171.177  14
  -1  10  -7 1090.59 269.979   1
   1 -10   7 657.245 254.900  35
   1 -10   8 1366.32 219.662  14
  -1  10  -8 1795.65 326.901   1
   1 -10   8 1839.35 462.807  35
  -1  10  -9 336.250 216.813   1
   1 -10   9 514.290 201.717  14
   1 -10   9 362.779 274.874  35
   1 -10  10 178.669 132.691  15
   1 -10  10 235.814 148.562  14
   1 -10  11-132.362 174.941  14
   1 -10  11-8.43191 147.576  15
   1 -10  12-42.2830 153.497  14
   1 -10  12-34.2324 132.704  15
   1 -10  13 2267.09 269.806  14
   1 -10  13 2395.17 258.828  15
   1 -10  14-47.4449 145.389  15
   1 -10  14 45.1676 128.891  14
  -1  10 -15 59.3053 99.3701  28
   1 -10  15 102.824 150.437  14
   1 -10  15-22.6496 118.528  15
  -1  10 -16 253.800 109.038  28
   1 -10  16 261.532 125.955  14
  -1  10 -17 892.960 138.864  28
   1 -10  17 928.355 155.283  17
   1 -10  18 534.036 112.849  17
  -1  10 -18 614.965 105.459  28
   1 -10  19 39.2854 93.7117  20
   1 -10  20-1.64687 84.2935  20
  -1   9  25-115.346 99.5360  10
   1  -9 -25 11.5105 74.4730  26
   1  -9 -24 20.2544 101.148  26
   1  -9 -24 2.97539 79.4934  18
   1  -9 -23 308.386 140.937  26
   1  -9 -23 122.422 101.376  29
   1  -9 -22 336.778 130.283  29
   1  -9 -22 83.6549 130.206  26
   1  -9 -21 268.725 163.393  26
   1  -9 -21 158.778 120.886  29
   1  -9 -20 72.0796 126.261  29
   1  -9 -19 114.047 110.351  25
   1  -9 -19 70.6814 134.934  29
   1  -9 -18 491.237 174.211   9
   1  -9 -18 61.8053 148.361  29
   1  -9 -18 296.429 122.506  25
   1  -9 -17 249.815 149.572  29
   1  -9 -17 180.804 150.314   9
   1  -9 -17-70.9019 140.112  25
   1  -9 -16 5247.37 380.761  29
   1  -9 -16 5054.80 331.477  25
   1  -9 -16 4866.06 395.657   9
   1  -9 -15 158.601 169.890   5
  -1   9  15-21.9245 177.199   8
  -1   9  15 79.0124 227.137  30
   1  -9 -15 232.037 133.180   9
   1  -9 -15 7.29946 142.164  29
   1  -9 -15-191.390 284.053  34
   1  -9 -15 179.765 127.914  25
  -1   9  14 99.8268 188.055   8
  -1   9  14-125.241 241.737  30
   1  -9 -14 268.566 209.480   5
   1  -9 -14 21.9599 140.743   9
   1  -9 -14-23.4094 123.663  29
   1  -9 -14 495.007 313.637  34
  -1   9  13-59.2902 170.141   8
   1  -9 -13 273.165 142.285  29
   1  -9 -13 167.851 148.513   9
  -1   9  13 376.840 241.022  30
   1  -9 -13 25.9206 192.544  34
   1  -9 -13 316.794 155.526   5
   1  -9 -12 403.544 166.387   5
   1  -9 -12 776.157 307.014  34
  -1   9  12 703.933 221.013   8
  -1   9  12 836.044 293.989  30
   1  -9 -11 4457.15 581.487  34
  -1   9  11 4160.90 557.862  30
   1  -9 -11 4308.28 397.455   5
  -1   9  11 4435.29 408.573   8
  -1   9  10 2824.19 321.280   8
   1  -9 -10 2983.05 323.783   5
   1  -9 -10 2097.13 381.421  34
  -1   9  10 2433.68 409.441  30
   1  -9  -9 7884.57 722.129  34
  -1   9   9 8476.35 533.730   8
   1  -9  -9 8085.20 492.445   5
  -1   9   9 7924.52 492.690  36
  -1   9   9 7447.06 635.802  30
  -1   9   8 5774.39 407.890  36
  -1   9   8 5248.84 502.705  30
   1  -9  -8 5583.94 388.943   5
   1  -9  -8 5544.37 566.371  34
  -1   9   8 5898.39 427.684   8
  -1   9   7 794.492 168.489  36
   1  -9  -7 520.271 201.862  34
  -1   9   7 355.504 139.709  30
   1  -9  -7 699.990 156.649   5
  -1   9   7 885.117 176.895   8
   1  -9  -7 739.430 215.705   7
  -1   9   6 165.306 93.1099  36
   1  -9  -6 367.785 183.164   7
   1  -9  -5 3174.97 385.531   6
   1  -9  -5 3287.14 359.554  35
   1  -9  -5 2950.12 357.890  34
  -1   9   5 3623.40 344.924  36
   1  -9  -5 2896.62 359.519   7
   1  -9  -4 8822.25 566.410  34
   1  -9  -4 9441.09 669.488   6
  -1   9   4 10649.5 609.875  36
   1  -9  -4 9676.04 644.709  35
   1  -9  -4 9596.45 628.538   7
   1  -9  -3 531.176 234.812   6
   1  -9  -3 748.349 139.620   3
   1  -9  -3 740.876 207.989   7
   1  -9  -3 601.357 170.723  34
  -1   9   3 813.910 204.751  32
   1  -9  -3 774.477 254.807  35
  -1   9   2 2312.99 264.496  32
   1  -9  -2 2607.24 231.042   3
   1  -9  -2 2681.52 382.511  35
   1  -9  -2 2565.73 333.548   7
   1  -9  -2 2545.49 390.570   6
   1  -9  -1 414.028 203.974  35
   1  -9  -1 782.834 203.053   7
   1  -9  -1 631.716 189.279   6
  -1   9   1 838.896 171.662  32
   1  -9  -1 792.503 161.812   3
   1  -9   0 295.079 189.685  35
   1  -9   0-16.3384 105.439   3
  -1   9   0 120.797 106.133  32
   1  -9   0 233.542 211.139   6
  -1   9  -1 461.073 175.392   1
  -1   9  -1 436.035 140.546  32
   1  -9   1 725.823 268.438   6
   1  -9   1 735.191 225.879  35
  -1   9  -2 52.8671 153.304   1
   1  -9   2 226.406 196.325  35
   1  -9   2 451.392 266.887   6
  -1   9  -3 1319.44 284.450   1
   1  -9   3 1187.80 340.893  35
   1  -9   3 712.699 257.892   6
  -1   9  -4 2259.72 341.338   1
   1  -9   4 1905.99 411.399   6
   1  -9   4 1515.16 353.540  35
   1  -9   5 3955.38 547.107  35
   1  -9   5 3675.10 541.317   6
  -1   9  -5 5066.22 498.541   1
  -1   9  -6 2283.19 358.788   1
   1  -9   6 1800.14 422.294  35
   1  -9   6 2082.64 453.861   6
   1  -9   7 1052.28 360.431  35
   1  -9   7 1185.60 376.679   6
  -1   9  -7 1641.17 321.157   1
  -1   9  -8 1274.22 283.862   1
   1  -9   8 1642.59 433.670  35
  -1   9  -9 219.395 181.262   1
   1  -9   9 0.96921 284.159  35
   1  -9   9 22.2856 153.184  14
   1  -9  10 1094.26 382.269  35
   1  -9  10 1078.93 200.857  14
   1  -9  10 1086.68 228.216  22
   1  -9  10 854.278 166.553  15
  -1   9 -10 863.268 237.148   1
   1  -9  11 817.320 396.236  35
   1  -9  11 665.899 195.586  22
  -1   9 -11 1171.94 307.576   1
   1  -9  11 650.309 198.500  14
   1  -9  11 662.201 169.005  15
   1  -9  12 3342.71 300.809  15
  -1   9 -12 2845.36 291.662  28
   1  -9  12 2748.05 302.628  14
   1  -9  12 2713.42 325.493  22
   1  -9  13 892.106 229.960  22
  -1   9 -13 545.616 159.065  28
   1  -9  13 1078.76 199.907  15
   1  -9  13 303.622 138.834  14
   1  -9  14 225.485 179.775  22
  -1   9 -14 520.340 180.148  28
   1  -9  14 489.455 168.192  15
   1  -9  14 711.004 208.865  14
  -1   9 -15 280.801 130.014  28
   1  -9  15 359.967 143.691  14
   1  -9  15 245.586 146.468  15
   1  -9  16 707.784 159.491  14
  -1   9 -16 630.347 163.066  28
   1  -9  16 486.423 157.745  15
  -1   9 -17 54.4616 114.011  28
   1  -9  18-37.2729 84.1464  17
  -1   9 -18-25.8600 96.0000  28
  -1   9 -19 99.3260 85.0826  28
  -1   9 -20-122.004 77.4658  28
   1  -9  20 11.4627 98.3514  20
   1  -9  21 86.0249 82.6771  20
   1  -8 -25 265.608 95.0190  26
  -1   8  24-127.266 112.231  12
   1  -8 -24 196.689 102.171  26
  -1   8  23-87.6140 106.525  12
   1  -8 -23 79.1339 111.251  26
  -1   8  22 364.134 144.501  12
   1  -8 -22 222.952 142.207  26
   1  -8 -22 126.325 106.568  29
   1  -8 -21 828.959 170.035  29
  -1   8  21 627.266 163.681  12
  -1   8  20 2965.11 305.887  12
   1  -8 -20 3953.40 301.276  29
   1  -8 -19 1123.75 171.925  25
   1  -8 -19 1600.97 208.605  29
  -1   8  19 1471.64 226.246  12
   1  -8 -18 1214.94 201.218  29
   1  -8 -18 1307.70 229.040   9
   1  -8 -18 1087.03 178.986  25
   1  -8 -17 1497.51 204.752  25
   1  -8 -17 1310.23 209.105   9
   1  -8 -17 1404.96 221.131  29
   1  -8 -16 145.599 242.860  34
  -1   8  16 257.287 310.571  30
  -1   8  16 229.835 208.516   8
   1  -8 -16-46.8069 139.360   9
   1  -8 -16-136.763 142.841  29
   1  -8 -16-169.517 225.697   5
   1  -8 -16 179.638 140.442  25
   1  -8 -15 3451.91 305.534  29
   1  -8 -15 2901.39 528.248  34
  -1   8  15 2758.06 509.790  30
   1  -8 -15 3921.56 332.602   9
  -1   8  15 2611.39 354.273   8
   1  -8 -15 4301.29 280.749  25
   1  -8 -15 3063.58 390.404   5
  -1   8  14 382.521 300.569  30
  -1   8  14 178.659 157.085   8
   1  -8 -14-64.8414 188.836  34
   1  -8 -14 26.6850 123.994  29
   1  -8 -14 109.534 159.671   5
  -1   8  13 6647.68 502.582   8
  -1   8  13 6898.79 735.421  30
   1  -8 -13 6013.45 523.130   5
   1  -8 -13 5848.98 682.976  34
  -1   8  12 1983.78 417.560  30
   1  -8 -12 1506.58 286.549   5
  -1   8  12 2349.01 299.698   8
   1  -8 -12 1082.99 294.983  34
   1  -8 -11 25.8876 212.296  34
  -1   8  11 240.158 184.709   8
   1  -8 -11 98.5937 123.835   5
  -1   8  11 264.673 216.728  30
   1  -8 -10 3635.37 508.508  34
  -1   8  10 3899.92 351.884   8
   1  -8 -10 3811.74 351.370   5
  -1   8  10 3961.12 516.204  30
  -1   8   9 1668.22 305.912  30
   1  -8  -9 1660.86 213.913   5
  -1   8   9 2036.13 236.866  36
   1  -8  -9 1865.70 364.210  34
  -1   8   9 2036.99 246.740   8
  -1   8   8 2178.00 253.958  36
   1  -8  -8 2175.40 243.576   5
  -1   8   8 2820.70 297.051   8
   1  -8  -8 2319.14 362.475  34
  -1   8   8 2536.71 372.781  30
   1  -8  -7 382.436 137.457   5
  -1   8   7 127.354 115.639   8
   1  -8  -7 389.456 178.759   7
  -1   8   7 323.257 131.187  36
  -1   8   7 199.431 151.406  30
   1  -8  -7 1.05957 176.584  34
  -1   8   6 7092.62 436.555  36
   1  -8  -6 6309.24 454.189   6
   1  -8  -6 6415.08 512.846   7
   1  -8  -6 6740.71 381.819   5
   1  -8  -6 6419.54 541.477  34
  -1   8   6 6184.53 485.946  30
   1  -8  -5 3017.85 234.764   5
   1  -8  -5 3262.36 359.957   7
   1  -8  -5 3037.44 361.814  34
   1  -8  -5 2749.31 260.573   2
  -1   8   5 2923.76 301.845  30
   1  -8  -5 2669.48 325.693   6
   1  -8  -5 2931.46 336.044  35
  -1   8   5 3859.83 281.384  31
  -1   8   5 3467.03 309.974  36
   1  -8  -4 8650.68 379.008   5
   1  -8  -4 9178.92 350.614   3
  -1   8   4 8759.13 517.023  36
   1  -8  -4 8590.09 446.086   2
  -1   8   4 7471.73 437.615  30
   1  -8  -4 8262.67 549.677  34
   1  -8  -4 8091.47 585.277   6
   1  -8  -4 8446.75 559.932   7
  -1   8   4 8455.57 441.485  31
   1  -8  -4 8555.26 547.123  35
   1  -8  -3 3101.91 380.651   6
   1  -8  -3 3283.89 317.984  34
  -1   8   3 3852.66 290.587  31
   1  -8  -3 3106.43 220.176   3
   1  -8  -3 2960.26 245.449   2
   1  -8  -3 2903.31 326.892   7
   1  -8  -3 3641.13 392.130  35
   1  -8  -2 492.880 155.842  34
   1  -8  -2 398.424 151.123   7
  -1   8   2 207.395 105.005  32
  -1   8   2 505.066 143.537  31
   1  -8  -2 340.903 103.029   2
   1  -8  -2 551.111 123.943   3
   1  -8  -2 601.682 236.305   6
   1  -8  -2 304.231 193.316  35
   1  -8  -1 10818.1 481.195   3
   1  -8  -1 10634.1 436.096   2
   1  -8  -1 11438.4 500.477  34
  -1   8   1 11706.3 579.612  32
   1  -8  -1 11712.5 770.417   6
   1  -8  -1 11504.9 737.663  35
  -1   8   0 37094.6 1076.43  32
   1  -8   0 34944.9 1414.22   6
   1  -8   0 35058.5 992.725   3
   1  -8   0 37232.9 1401.92  35
  -1   8  -1 338.661 136.883  32
   1  -8   1 324.485 253.947   6
   1  -8   1 57.7453 94.8426   3
   1  -8   1 74.9327 207.022  35
  -1   8  -2 9328.55 467.611  32
   1  -8   2 8381.81 483.713   3
   1  -8   2 7232.97 635.477  35
   1  -8   2 7611.24 666.134   6
   1  -8   2 8510.47 455.519  33
  -1   8  -2 9252.73 573.272   1
   1  -8   3 843.859 167.419  33
   1  -8   3 893.554 295.428  35
   1  -8   3 964.361 291.637   6
  -1   8  -3 840.952 157.999  32
  -1   8  -3 1092.78 232.431   1
  -1   8  -4 1297.95 193.882  32
  -1   8  -4 1660.27 289.271   1
   1  -8   4 1476.73 367.082   6
   1  -8   4 1187.72 318.985  35
   1  -8   4 990.859 203.319  33
  -1   8  -5 1097.78 241.346   1
   1  -8   5 895.222 286.405  35
   1  -8   5 1110.28 223.987  33
  -1   8  -5 1149.19 189.723  32
   1  -8   5 1211.80 330.252   6
   1  -8   6 1162.75 235.895  33
   1  -8   6 1061.35 317.061  35
  -1   8  -6 951.015 168.805  32
   1  -8   6 1024.13 323.030   6
  -1   8  -6 1108.62 276.011   1
   1  -8   7 677.654 224.090  33
   1  -8   7 263.382 208.033   6
  -1   8  -7 652.493 208.058   1
   1  -8   7 421.363 263.854  35
  -1   8  -8 376.986 205.665   1
   1  -8   8 306.365 244.062  35
   1  -8   8 749.706 253.263  33
   1  -8   8-83.8614 251.097   6
   1  -8   9 2272.96 466.714  35
  -1   8  -9 2729.91 362.999   1
   1  -8   9 2575.13 394.936  33
   1  -8  10-222.470 292.309  35
  -1   8 -10 409.733 204.648   1
   1  -8  10 118.709 172.584  33
   1  -8  11 171.874 156.016  22
  -1   8 -11 415.728 227.081   1
   1  -8  11 244.347 232.542  35
   1  -8  11 513.632 174.732  14
   1  -8  11 638.229 293.436  33
   1  -8  11 397.833 153.331  15
   1  -8  11 520.574 181.821  19
  -1   8 -12 309.635 174.361   1
   1  -8  12 215.193 163.346  22
   1  -8  12 206.662 153.516  15
   1  -8  12 24.6285 295.556  35
   1  -8  12 277.815 142.699  14
   1  -8  12 397.974 239.557  33
   1  -8  13 412.312 173.339  15
   1  -8  13 477.458 189.565  14
  -1   8 -13 443.632 151.312  28
   1  -8  13 105.254 159.937  22
   1  -8  14 2306.90 276.562  14
   1  -8  14 2140.72 255.791  15
  -1   8 -14 2248.66 266.452  28
   1  -8  14 2352.01 309.953  22
   1  -8  15 1299.95 216.659  15
  -1   8 -15 1355.89 221.577  28
   1  -8  15 1703.06 225.457  14
   1  -8  15 1436.20 272.147  22
  -1   8 -16 4240.58 357.841  28
   1  -8  16 3878.93 385.369  22
   1  -8  16 4548.86 348.880  15
   1  -8  17 109.230 177.324  22
  -1   8 -17 3.04312 130.454  28
  -1   8 -18 463.362 146.043  28
  -1   8 -19 83.6887 104.593  28
  -1   8 -20 443.323 124.696  28
  -1   8 -21 368.126 105.526  28
   1  -8  22 92.5219 76.7653  20
  -1   7  26 112.009 98.3559  10
  -1   7  25 44.9211 87.6527  12
   1  -7 -25 1.38732 73.8246  26
  -1   7  24-47.7255 118.967  12
   1  -7 -24 188.733 115.428  26
  -1   7  23 1568.84 217.103  12
   1  -7 -23 1184.70 194.987  26
   1  -7 -22 298.732 128.384  29
  -1   7  22 396.861 169.595  12
  -1   7  21 1036.72 206.828  12
   1  -7 -21 1074.58 186.535  29
  -1   7  20 254.254 166.274  12
   1  -7 -20 307.703 136.056  29
   1  -7 -19 27.5153 130.836  29
  -1   7  19 89.3899 156.206  12
   1  -7 -19-247.958 138.190  25
   1  -7 -18 143.225 139.161  25
   1  -7 -18 25.9371 130.645  29
  -1   7  18 323.976 158.970  12
   1  -7 -17 155.085 193.343   5
  -1   7  17-107.424 346.668  30
   1  -7 -17-21.3541 138.981  29
  -1   7  17-116.424 151.364  12
   1  -7 -17 100.432 132.821  25
   1  -7 -17 139.599 149.941   9
   1  -7 -16 2309.38 228.112  25
   1  -7 -16 2652.07 279.617   9
  -1   7  16 2280.14 268.312  12
  -1   7  16 2665.31 534.985  30
   1  -7 -16 2002.08 357.909   5
   1  -7 -16 1920.20 434.450  34
  -1   7  16 1848.17 289.951   8
   1  -7 -16 2577.03 273.921  29
  -1   7  15 7431.92 561.808   8
   1  -7 -15 7032.73 608.679   5
   1  -7 -15 7483.48 792.377  34
   1  -7 -15 9181.72 461.539  29
  -1   7  15 7562.24 867.884  30
   1  -7 -14 105.679 148.115   5
   1  -7 -14 32.6185 244.485  34
  -1   7  14 272.156 302.177  30
  -1   7  14 147.444 168.752   8
   1  -7 -13 413.520 276.082  34
  -1   7  13 683.101 321.799  30
  -1   7  13 842.938 218.874   8
   1  -7 -13 592.942 192.630   5
   1  -7 -12 763.577 193.302   5
  -1   7  12 710.330 311.454  30
   1  -7 -12 1076.24 293.571  34
  -1   7  12 1255.85 225.162   8
  -1   7  11 9066.35 793.603  30
  -1   7  11 8485.96 526.206   8
   1  -7 -11 8613.09 560.610   5
   1  -7 -11 8779.01 766.651  34
  -1   7  10 2611.27 286.564  31
   1  -7 -10 2652.52 405.190  34
   1  -7 -10 2634.97 309.485   5
  -1   7  10 3137.85 465.591  30
  -1   7  10 2847.10 301.126   8
  -1   7   9 901.595 188.001   8
   1  -7  -9 965.738 271.214  34
  -1   7   9 683.504 178.244  31
  -1   7   9 1014.14 273.611  30
   1  -7  -9 770.192 150.040   5
   1  -7  -8 6321.88 588.606  34
  -1   7   8 6868.19 566.678  30
   1  -7  -8 6548.10 413.361   5
  -1   7   8 6711.52 400.835  31
  -1   7   8 6062.12 382.920  36
  -1   7   8 6487.80 408.496   8
   1  -7  -7 1298.73 184.723   5
  -1   7   7 1611.67 193.953  31
   1  -7  -7 1263.65 293.126  34
  -1   7   7 1391.20 192.331   8
  -1   7   7 1272.20 183.201  36
   1  -7  -7 1465.04 272.199   7
  -1   7   7 1498.82 280.840  30
   1  -7  -6 4418.16 413.293   7
   1  -7  -6 4266.25 431.653  34
  -1   7   6 4637.57 307.961  31
  -1   7   6 4503.70 320.843  36
   1  -7  -6 4087.58 285.801   5
   1  -7  -6 4308.65 339.345   6
  -1   7   6 4231.33 397.710  30
   1  -7  -6 4228.67 328.005   2
  -1   7   5 872.411 151.484  31
   1  -7  -5 823.353 198.333   6
   1  -7  -5 855.187 226.074  34
   1  -7  -5 930.060 188.015  35
  -1   7   5 967.231 179.989  36
   1  -7  -5 976.121 190.285   7
   1  -7  -5 842.164 165.278   2
   1  -7  -5 789.450 132.734   5
  -1   7   5 906.179 202.357  30
   1  -7  -4 9393.04 556.827   7
  -1   7   4 10119.2 458.692  31
   1  -7  -4 9507.81 337.548   3
   1  -7  -4 9077.91 439.898   2
  -1   7   4 9817.37 498.163  36
   1  -7  -4 9225.57 561.018   6
   1  -7  -4 9021.95 551.338  34
  -1   7   4 9504.89 497.040  30
   1  -7  -4 9362.73 390.412   5
   1  -7  -4 9606.06 539.490  35
   1  -7  -3 676.722 196.407   6
   1  -7  -3 589.190 100.475   5
   1  -7  -3 605.293 157.910   7
  -1   7   3 330.906 114.904  30
   1  -7  -3 609.736 170.089  34
   1  -7  -3 571.813 190.920  35
   1  -7  -3 517.044 92.8161   3
   1  -7  -3 652.440 137.116   2
  -1   7   3 352.927 112.967  31
   1  -7  -2 2413.97 286.611   7
  -1   7   2 2345.34 242.173  31
   1  -7  -2 2561.24 258.267  34
   1  -7  -2 2953.91 346.449  35
   1  -7  -2 2323.77 336.531   6
  -1   7   2 2088.52 186.608  30
   1  -7  -2 2644.33 217.728   2
   1  -7  -2 2499.45 202.829   3
   1  -7  -1 64.3649 64.0867  33
   1  -7  -1 254.110 215.956   6
   1  -7  -1 185.026 192.560  35
  -1   7   1 101.916 120.219  32
   1  -7  -1 121.826 101.220   3
   1  -7  -1 124.479 82.6115  34
   1  -7  -1 120.320 87.9600   2
   1  -7   0 72.2646 71.8504  34
   1  -7   0 109.725 86.6405   3
   1  -7   0-321.058 243.337  35
   1  -7   0 78.2243 81.4883  33
   1  -7   0 107.107 75.4592   2
   1  -7   0 3.73147 180.032   6
  -1   7   0 25.5159 109.642  32
   1  -7   1 238.337 81.1939   2
  -1   7  -1 102.838 89.4875  32
   1  -7   1 318.805 97.6001  33
   1  -7   1 415.973 194.349  35
   1  -7   1 240.476 113.745   3
   1  -7   1 289.449 178.420   6
   1  -7   2 794.988 296.406  35
   1  -7   2 839.000 170.693   3
   1  -7   2 719.479 157.272  33
  -1   7  -2 707.480 130.705  32
   1  -7   2 565.444 99.3616   2
   1  -7   2 637.025 224.007   6
  -1   7  -2 624.949 199.393   1
   1  -7   3 371.007 194.776   6
  -1   7  -3 633.896 189.226   1
  -1   7  -3 696.109 143.985  32
   1  -7   3 388.802 211.717  35
   1  -7   3 430.017 148.902   3
   1  -7   3 462.631 129.411  33
   1  -7   4 2894.97 438.486   6
  -1   7  -4 3201.77 345.098   1
   1  -7   4 3420.45 468.564  35
  -1   7  -4 3206.57 259.102  32
   1  -7   4 2906.97 306.694  33
   1  -7   5 5001.42 549.128   6
  -1   7  -5 5786.80 456.820   1
   1  -7   5 5318.17 433.127  33
   1  -7   5 5166.23 553.826  35
  -1   7  -5 5099.57 343.305  32
   1  -7   6 7273.99 545.907  33
   1  -7   6 7496.57 716.363   6
  -1   7  -6 8385.25 567.700   1
   1  -7   6 7598.91 694.977  35
  -1   7  -6 8177.84 440.412  32
   1  -7   7 762.834 296.825  35
  -1   7  -7 512.583 131.352  32
   1  -7   7 1024.88 308.830   6
  -1   7  -7 462.226 180.804   1
   1  -7   7 772.688 258.624  33
  -1   7  -8 83.2882 149.904   1
   1  -7   8 267.155 240.638  35
   1  -7   8 76.8093 187.146  33
   1  -7   8-30.3145 221.749   6
  -1   7  -8 10.1477 88.9471  32
   1  -7   9 3304.43 454.738  33
  -1   7  -9 4042.21 429.421   1
   1  -7   9 3616.46 536.571  35
   1  -7   9 4084.75 564.704   6
  -1   7  -9 3564.55 334.091  32
  -1   7 -10 4608.28 451.300   1
   1  -7  10 3814.45 487.127  33
  -1   7 -10 3243.65 349.372  32
   1  -7  10 3990.43 532.271  35
   1  -7  11-242.693 227.900  33
  -1   7 -11 12.0836 146.687   1
   1  -7  12 4385.46 323.844  15
   1  -7  12 4967.87 353.283  14
   1  -7  12 4729.40 368.140  22
  -1   7 -12 5326.06 491.541   1
   1  -7  12 5077.27 588.023  33
   1  -7  12 5461.24 654.590  35
   1  -7  12 4498.62 384.838  19
   1  -7  13 328.468 173.337  15
   1  -7  13 411.976 170.541  14
   1  -7  13 263.203 155.307  22
   1  -7  13 301.272 253.006  33
  -1   7 -13-37.5353 149.877   1
   1  -7  14 936.217 216.165  22
   1  -7  14 681.547 177.355  15
  -1   7 -14 774.961 201.310  28
   1  -7  14 760.003 172.942  14
  -1   7 -15 9673.93 541.199  28
   1  -7  15 9913.07 529.891  15
   1  -7  15 9267.17 567.752  22
   1  -7  16 4621.39 355.694  15
  -1   7 -16 4570.27 377.155  28
   1  -7  16 4333.86 399.922  22
   1  -7  17 180.935 177.665  22
  -1   7 -17-197.629 164.580  28
   1  -7  17-77.7308 154.093  15
   1  -7  18 41.4900 186.078  22
  -1   7 -18 12.6530 122.270  28
  -1   7 -19 1604.54 227.828  28
   1  -7  19 1461.37 259.793  22
  -1   7 -20 135.420 143.291  28
  -1   7 -21-50.9383 100.824  28
  -1   7 -22-35.1105 90.4900  28
  -1   6  26 1955.90 199.599  10
  -1   6  26 1410.20 145.674  12
  -1   6  25 23.5190 107.211  12
  -1   6  24 92.9705 138.101  12
   1  -6 -24 431.706 136.382  26
  -1   6  23 566.132 173.905  12
   1  -6 -23 667.626 157.194  26
  -1   6  22-155.776 143.938  12
  -1   6  21 689.621 189.588  12
   1  -6 -21 480.980 155.817  29
   1  -6 -20 1923.68 222.686  29
  -1   6  20 1733.56 258.460  12
  -1   6  19 1732.38 257.115  12
   1  -6 -19 1967.00 237.083  29
   1  -6 -18 9087.80 456.831  29
   1  -6 -18 8335.83 415.980  25
  -1   6  18 9177.45 540.119  12
   1  -6 -17 4560.56 313.056  25
   1  -6 -17 5254.09 347.519  29
  -1   6  17 3854.68 361.261  12
   1  -6 -17 4343.13 509.522   5
  -1   6  17 4188.90 677.122  30
   1  -6 -17 4001.61 566.162  34
   1  -6 -16 4533.92 509.532   5
   1  -6 -16 4916.28 303.023  25
  -1   6  16 3917.63 349.906  12
   1  -6 -16 5011.03 343.829  29
  -1   6  16 4321.04 687.159  30
   1  -6 -16 3838.77 561.608  34
   1  -6 -15 6644.38 721.194  34
   1  -6 -15 7020.24 603.551   5
  -1   6  15 7171.07 829.663  30
  -1   6  15 6569.29 504.725   8
   1  -6 -14-89.7479 184.057  34
  -1   6  14 641.931 314.584  30
   1  -6 -14 597.146 214.537   5
  -1   6  14 172.202 142.625   8
  -1   6  14 262.578 163.645  31
   1  -6 -13 2983.49 487.520  34
  -1   6  13 3147.13 521.183  30
  -1   6  13 3442.20 373.938  31
   1  -6 -13 3044.12 361.386   5
  -1   6  13 3043.15 335.558   8
  -1   6  12 192.457 112.848  31
  -1   6  12 164.131 194.580  30
   1  -6 -12 440.488 143.578   5
   1  -6 -12 629.591 254.018  34
  -1   6  12 546.016 188.774   8
  -1   6  11 360.981 234.353  30
   1  -6 -11 235.254 176.159  34
   1  -6 -11 193.932 120.577   5
  -1   6  11 296.300 150.094  31
  -1   6  11 232.328 144.003   8
  -1   6  10 9401.44 751.533  30
   1  -6 -10 9857.21 574.165   5
   1  -6 -10 10162.0 769.538  34
  -1   6  10 10103.7 556.315  31
  -1   6  10 9885.94 518.745   8
  -1   6   9 360.198 137.451  31
  -1   6   9 301.484 190.211  30
   1  -6  -9 359.920 148.327   5
  -1   6   9 466.298 151.596   8
   1  -6  -9 273.970 188.587  34
  -1   6   8 3153.56 283.509  31
   1  -6  -8 2535.50 258.566   5
  -1   6   8 2969.06 272.210   8
  -1   6   8 2769.04 248.471  36
  -1   6   8 3271.95 421.283  30
   1  -6  -8 2466.92 369.440  34
   1  -6  -7 4402.54 458.353  34
  -1   6   7 4092.88 304.584  31
   1  -6  -7 3833.51 298.727   5
  -1   6   7 3941.11 297.859   8
  -1   6   7 3822.20 417.672  30
  -1   6   7 3533.96 264.416  36
   1  -6  -6 1911.89 225.856   6
  -1   6   6 2221.32 246.392  31
  -1   6   6 2015.20 308.255  30
   1  -6  -6 1774.86 335.038  34
   1  -6  -6 1956.50 236.718   2
  -1   6   6 2377.91 224.797  36
   1  -6  -6 1912.99 210.095   5
   1  -6  -6 2117.22 300.476   7
   1  -6  -5 2263.62 234.269  35
   1  -6  -5 2127.43 115.847   3
   1  -6  -5 2267.73 269.812   7
  -1   6   5 2503.20 220.417  36
   1  -6  -5 2144.17 196.288   5
   1  -6  -5 2056.67 220.024   2
  -1   6   5 2622.38 294.310  30
   1  -6  -5 2009.96 229.756   6
   1  -6  -5 2026.06 285.825  34
  -1   6   5 2552.07 220.627  31
   1  -6  -4 1656.59 243.064  34
  -1   6   4 1511.62 219.409  30
   1  -6  -4 1748.98 171.854   5
  -1   6   4 1484.90 167.671  31
   1  -6  -4 1651.03 214.087  35
   1  -6  -4 1990.13 251.459   7
   1  -6  -4 1701.41 194.232   2
   1  -6  -4 1786.97 120.505   3
  -1   6   4 1271.20 175.600  36
   1  -6  -4 1696.94 239.296   6
  -1   6   3 431.374 124.319  30
   1  -6  -3 461.239 160.924  34
   1  -6  -3 487.564 129.936  35
   1  -6  -3 546.018 113.375   2
   1  -6  -3 669.921 189.714   6
  -1   6   3 420.152 101.906  31
   1  -6  -3 401.458 136.950   7
   1  -6  -3 430.454 91.2088   5
   1  -6  -3 505.007 93.7896   3
   1  -6  -2 86.9448 130.949   6
   1  -6  -2 73.1256 98.2749  34
  -1   6   2 44.2714 70.0129  30
   1  -6  -2 144.812 162.474  35
   1  -6  -2 145.058 119.190   7
   1  -6  -2 49.0417 66.4885   5
   1  -6  -2 41.2871 64.2015   3
   1  -6  -2 97.2937 81.4489   2
  -1   6   1 2479.39 236.399  32
  -1   6   1 2123.79 162.480  30
   1  -6  -1 2466.83 309.629   6
   1  -6  -1 2753.98 306.048  35
   1  -6  -1 2528.66 190.022   2
   1  -6  -1 2560.55 192.399  33
   1  -6  -1 2456.76 195.729   3
   1  -6  -1 2463.21 225.204  34
   1  -6   0 7407.58 327.953  34
   1  -6   0 8054.21 515.695  35
   1  -6   0 7045.42 512.114   6
  -1   6   0 7205.34 366.903  32
   1  -6   0 6814.99 301.735   2
   1  -6   0 7078.18 334.733   3
   1  -6   0 7227.79 326.529  33
   1  -6   1 2650.06 188.205   2
   1  -6   1 2896.55 228.941  33
   1  -6   1 2345.36 217.391   3
   1  -6   1 2572.87 326.782  35
   1  -6   1 2969.51 359.456   6
  -1   6  -1 3455.93 245.775  32
  -1   6  -2 2088.31 191.125  32
   1  -6   2 1726.87 202.599  33
   1  -6   2 1753.56 314.012   6
   1  -6   2 1448.74 182.123   3
   1  -6   2 1355.44 143.279   2
   1  -6   2 1780.33 296.924  35
   1  -6   3 3071.04 265.016   3
   1  -6   3 3604.21 315.435  33
   1  -6   3 3521.24 395.553  35
  -1   6  -3 3774.48 259.024  32
   1  -6   3 3350.61 388.108   6
  -1   6  -3 3488.63 330.738   1
   1  -6   4 15654.6 881.523   6
  -1   6  -4 15532.1 686.683   1
   1  -6   4 15246.6 851.704  35
   1  -6   4 16193.7 696.419  33
  -1   6  -4 15176.0 554.304  32
   1  -6   5 599.879 201.263   6
  -1   6  -5 608.439 119.180  32
   1  -6   5 596.373 256.072  35
  -1   6  -5 588.763 179.939   1
   1  -6   5 887.397 212.635  33
   1  -6   6 2415.42 319.332  33
   1  -6   6 2425.51 393.812   6
  -1   6  -6 2337.32 228.616  32
   1  -6   6 2256.36 369.059  35
  -1   6  -6 2818.76 321.143   1
  -1   6  -7 132.891 94.5565  32
   1  -6   7 130.008 212.332  35
  -1   6  -7 261.231 159.368   1
   1  -6   7 353.375 185.884  33
   1  -6   7 139.478 200.381   6
   1  -6   8 26.3702 204.180   6
  -1   6  -8 219.940 166.818   1
   1  -6   8-44.7069 209.074  35
  -1   6  -8 218.362 115.067  32
   1  -6   8 375.201 211.215  33
  -1   6  -9 682.962 158.460  32
   1  -6   9 562.477 256.371   6
   1  -6   9 546.717 222.625  33
   1  -6   9 934.765 326.587  35
  -1   6  -9 1055.76 234.591   1
  -1   6 -10 1075.29 199.609  32
  -1   6 -10 1290.72 245.636   1
   1  -6  10 1191.44 319.368  35
   1  -6  10 1221.20 297.333  33
   1  -6  11 1851.86 396.965  35
  -1   6 -11 1629.49 270.367   1
  -1   6 -11 1502.06 226.202  32
   1  -6  11 1576.95 336.820  33
  -1   6 -12 498.295 157.923  32
  -1   6 -12 410.502 163.759   1
   1  -6  12 279.549 206.023  33
   1  -6  12 275.325 222.211  35
   1  -6  13-208.476 159.406  15
   1  -6  13 222.166 189.545  22
   1  -6  13 17.9846 155.653  19
   1  -6  13 62.1452 233.474  35
  -1   6 -13 92.9876 204.397   1
   1  -6  13-147.719 253.508  33
   1  -6  14 132.891 191.321  19
   1  -6  14-357.319 243.878  33
   1  -6  14-371.627 171.570  15
  -1   6 -14-180.330 138.178   1
   1  -6  14-194.881 167.761  22
  -1   6 -15 10430.6 583.014  28
   1  -6  15 10099.3 521.205  15
   1  -6  15 9786.87 577.597  22
  -1   6 -16 1045.74 222.164  28
   1  -6  16 1247.68 222.958  15
   1  -6  16 1161.42 264.119  22
   1  -6  17-223.874 184.066  15
  -1   6 -17 255.818 152.396  28
   1  -6  17 82.2226 191.614  22
   1  -6  18 422.652 161.562  12
  -1   6 -18 339.772 163.819  28
   1  -6  18 480.303 200.271  22
   1  -6  19 500.950 212.589  22
  -1   6 -19 710.356 182.865  28
   1  -6  19 698.492 175.676  12
   1  -6  20 153.924 161.220  22
  -1   6 -20 541.999 172.759  28
  -1   6 -21 754.814 172.832  28
  -1   6 -22 46.8419 106.218  28
  -1   6 -23 327.460 104.427  28
  -1   5  26 235.060 110.008  10
  -1   5  26 153.320 95.7668  12
  -1   5  25 99.1257 116.751  12
   1  -5 -24 229.651 108.967  26
  -1   5  24 763.490 173.173  12
   1  -5 -23 261.781 128.398  26
  -1   5  23 407.004 176.054  12
  -1   5  22 255.931 172.721  12
   1  -5 -21-85.1633 123.096  29
  -1   5  21 180.401 154.867  12
   1  -5 -20 617.914 159.700  29
  -1   5  20 873.687 233.668  12
   1  -5 -19 542.900 153.735  29
  -1   5  19 255.927 157.895  12
  -1   5  18 10049.0 589.393  12
   1  -5 -18 12367.3 510.756  29
   1  -5 -17 4259.76 589.355  34
  -1   5  17 4458.13 400.900  12
  -1   5  17 4950.44 747.399  30
   1  -5 -17 4931.67 558.714   5
   1  -5 -17 5624.34 342.094  29
   1  -5 -17 5018.38 312.448  25
  -1   5  16 1006.33 193.168  12
   1  -5 -16 868.107 243.906   5
   1  -5 -16 877.788 182.970  29
  -1   5  16 667.971 212.834  31
   1  -5 -16 1112.44 359.906  34
  -1   5  16 1346.07 438.335  30
  -1   5  15 292.279 174.472  31
  -1   5  15 375.693 353.334  30
   1  -5 -15 419.866 267.915  34
   1  -5 -15 556.956 213.979   5
  -1   5  14 872.075 192.463   8
   1  -5 -14 994.635 290.500  34
  -1   5  14 1084.49 272.419  31
   1  -5 -14 1140.90 236.643   5
  -1   5  14 927.644 347.458  30
   1  -5 -13 244.934 165.205   5
   1  -5 -13 719.640 285.956  34
  -1   5  13 1027.49 323.179  30
  -1   5  13 647.397 228.336  31
  -1   5  13 1047.53 217.362   8
   1  -5 -12 1794.56 284.879   5
   1  -5 -12 1581.46 373.100  34
  -1   5  12 1480.29 363.484  30
  -1   5  12 1852.85 301.432  31
  -1   5  12 1945.76 272.649   8
  -1   5  11 606.439 167.444   8
  -1   5  11 482.906 277.265  30
  -1   5  11 519.822 169.760  31
   1  -5 -11 596.846 248.137  34
   1  -5 -11 691.389 216.009   5
   1  -5 -10 666.153 173.675   5
  -1   5  10 559.071 157.573  31
  -1   5  10 677.601 141.250   8
  -1   5  10 546.720 268.210  30
   1  -5 -10 1023.11 264.631  34
  -1   5   9 1810.10 233.817  31
  -1   5   9 1851.04 359.245  30
   1  -5  -9 1533.80 290.825  34
   1  -5  -9 1723.30 236.497   5
  -1   5   9 2014.45 227.246   8
  -1   5   8 19.4374 119.025  31
  -1   5   8 298.677 123.585   8
   1  -5  -8 231.650 128.402   5
  -1   5   8 244.844 182.308  30
   1  -5  -8 222.343 189.224  34
  -1   5   7 60.4588 100.948   8
   1  -5  -7-15.1424 63.3971   6
  -1   5   7 122.638 107.783  31
   1  -5  -7-32.9802 107.363   5
  -1   5   7 13.5622 191.250  30
   1  -5  -7-44.8287 162.989  34
  -1   5   7 59.3380 75.4454  36
  -1   5   6 13086.3 470.094  36
   1  -5  -6 12569.0 494.185   5
   1  -5  -6 13004.1 688.967  34
   1  -5  -6 12435.7 465.773   6
  -1   5   6 12716.9 684.472  30
   1  -5  -6 13928.6 641.217   7
   1  -5  -6 12565.9 560.674   2
  -1   5   6 13166.0 528.553  31
  -1   5   6 13141.8 496.111   8
   1  -5  -5 848.881 158.417   2
   1  -5  -5 693.834 52.4362   3
  -1   5   5 624.714 124.273  31
   1  -5  -5 851.022 141.516   5
  -1   5   5 756.543 202.345  30
  -1   5   5 772.729 119.253  36
   1  -5  -5 927.494 223.186  34
   1  -5  -5 851.952 168.974   7
   1  -5  -5 892.133 151.072  35
  -1   5   4 1590.80 227.581  30
   1  -5  -4 1370.98 183.105  35
  -1   5   4 1458.56 153.033  36
  -1   5   4 1419.44 173.263  31
   1  -5  -4 1456.69 148.323   5
   1  -5  -4 1540.11 204.677   7
   1  -5  -4 1552.22 235.335  34
   1  -5  -4 1612.15 97.4124   3
   1  -5  -4 1503.83 178.674   2
  -1   5   3 7892.34 409.168  30
  -1   5   3 7427.80 361.697  31
   1  -5  -3 8127.01 427.404  35
   1  -5  -3 7983.90 365.502   2
   1  -5  -3 7929.75 445.147  34
   1  -5  -3 7755.62 258.519   3
   1  -5  -3 8231.79 429.689   7
   1  -5  -3 7964.44 308.343   5
   1  -5  -2 3126.25 268.739   7
   1  -5  -2 3639.68 274.604  34
  -1   5   2 3097.73 228.427  30
   1  -5  -2 3020.00 282.983  35
   1  -5  -2 3389.98 179.757   5
   1  -5  -2 3078.12 214.525   2
   1  -5  -2 3388.45 178.492   3
   1  -5  -1 1085.29 137.903   2
   1  -5  -1 1070.52 125.164   3
   1  -5  -1 1024.09 163.007  34
   1  -5  -1 1163.28 214.951  35
   1  -5  -1 1025.95 126.388  33
  -1   5   0 28.3657 75.6417  32
   1  -5   0 78.0437 69.7546  34
   1  -5   0 148.492 85.3176  33
  -1   5   0 88.2171 47.9981  30
   1  -5   0 67.7104 65.4391   2
   1  -5   0 263.912 190.737  35
   1  -5   0 146.614 93.6442   3
   1  -5   1 107.955 69.3337   2
  -1   5  -1 11.6668 79.6336  32
   1  -5   1 114.940 84.8740  33
   1  -5   1 104.739 174.206  35
   1  -5   1 138.040 96.9441   3
   1  -5   2 195.201 168.758   6
   1  -5   2 491.532 130.288  33
   1  -5   2 240.397 170.986  35
  -1   5  -2-55.9624 81.5282  32
   1  -5   2 240.323 96.3826   3
   1  -5   3 1530.54 202.999  33
  -1   5  -3 1370.87 148.689  32
  -1   5  -3 1298.62 197.019   1
  -1   5  -3 1164.99 68.3069   5
   1  -5   3 1323.27 169.545   3
   1  -5   3 1611.32 295.697   6
   1  -5   3 1363.08 254.720  35
   1  -5   4 5361.01 456.984  35
   1  -5   4 4638.84 445.777   6
  -1   5  -4 4984.01 364.372   1
  -1   5  -4 4873.51 278.995  32
   1  -5   4 5229.74 386.351  33
  -1   5  -4 4819.30 173.038   5
  -1   5  -5 1090.13 188.563   1
  -1   5  -5 987.991 95.4056   5
   1  -5   5 1261.71 293.739   6
   1  -5   5 898.666 221.012  35
   1  -5   5 895.994 195.211  33
  -1   5  -5 994.016 143.686  32
   1  -5   6 1162.07 242.441  33
  -1   5  -6 1133.74 217.411   1
  -1   5  -6 933.009 141.319  32
  -1   5  -6 917.040 102.767   5
   1  -5   6 1329.99 268.928  35
   1  -5   6 975.271 269.697   6
   1  -5   7 5843.91 528.414  35
   1  -5   7 5338.73 466.554  33
  -1   5  -7 4752.62 315.834  32
   1  -5   7 4794.05 495.048   6
  -1   5  -7 5098.19 396.924   1
  -1   5  -8 1476.53 201.196  32
   1  -5   8 1363.36 293.902  35
  -1   5  -8 1470.36 223.405   1
   1  -5   8 1423.76 312.659   6
   1  -5   8 1125.22 243.282  33
   1  -5   9 14475.0 918.262   6
   1  -5   9 15306.4 881.688  33
   1  -5   9 14921.6 901.020  35
  -1   5  -9 14446.8 624.993  32
  -1   5  -9 15332.2 717.189   1
  -1   5 -10 357.066 126.280  32
   1  -5  10 364.506 214.824  35
   1  -5  10 648.034 257.871  33
   1  -5  10 445.791 239.246   6
  -1   5 -10 558.153 173.696   1
   1  -5  11 1850.76 366.957  33
  -1   5 -11 2023.27 288.343   1
   1  -5  11 2309.15 409.681  35
  -1   5 -11 1692.13 256.837  32
  -1   5 -12 1440.32 244.409  32
   1  -5  12 1815.35 393.564  33
   1  -5  12 2194.07 417.301  35
  -1   5 -12 2422.99 322.884   1
   1  -5  13-19.4622 229.232  35
  -1   5 -13 76.2247 154.268   1
  -1   5 -13 112.136 117.994  32
   1  -5  14 10569.7 591.616  19
   1  -5  14 9928.04 548.473  22
   1  -5  14 12106.0 528.634  15
  -1   5 -14 10912.6 672.681  32
   1  -5  14 10907.2 923.142  33
  -1   5 -14 11691.7 674.711   1
   1  -5  15 756.759 215.536  22
   1  -5  15 1206.51 214.790  15
  -1   5 -15 1063.64 225.966   1
  -1   5 -15 1161.45 239.627  28
   1  -5  15 1060.51 196.001  12
   1  -5  15 1205.05 388.271  33
   1  -5  16 2593.12 303.169  12
  -1   5 -16 2312.17 289.694  28
   1  -5  16 2413.80 287.073  15
   1  -5  16 2322.87 316.158  22
   1  -5  17 305.402 198.103  22
   1  -5  17 427.626 192.188  15
   1  -5  17 14.9946 145.936  12
  -1   5 -17 290.771 173.717  28
   1  -5  18 152.548 135.601  12
  -1   5 -18-130.448 148.470  28
  -1   5 -19 119.549 149.198  28
   1  -5  19 278.220 210.713  22
   1  -5  19 74.5510 149.180  12
   1  -5  20 263.369 172.494  12
   1  -5  20 140.166 210.766  22
  -1   5 -20 180.217 158.229  28
  -1   5 -21 323.842 141.521  28
   1  -5  21 439.260 143.780  12
   1  -5  21 540.618 181.739  22
   1  -5  22-96.2790 114.347  12
  -1   5 -22 25.5302 123.171  28
   1  -5  23-84.2457 89.4148  12
  -1   5 -23 220.828 126.569  28
  -1   5 -24 103.687 85.6567  28
  -1   4  26-158.914 107.222  12
  -1   4  26 220.280 121.221  10
  -1   4  25 509.610 153.992  12
  -1   4  25 499.433 154.597  10
  -1   4  24-105.761 166.755  12
  -1   4  23 1500.60 241.440  12
  -1   4  22 1162.23 234.732  12
  -1   4  21 63.6827 157.352  12
   1  -4 -20 266.640 130.261  29
  -1   4  20-28.1314 174.082  12
   1  -4 -20-32.9011 125.737  28
   1  -4 -19 4732.38 321.404  29
  -1   4  19 4947.76 415.204  12
   1  -4 -19 4816.09 374.337  28
   1  -4 -18 4239.08 287.625  29
  -1   4  18 3500.19 353.544  12
   1  -4 -18 3181.00 314.831  28
  -1   4  17 617.214 374.069  30
   1  -4 -17 519.541 210.317  34
  -1   4  17 20.9249 200.263  31
   1  -4 -17 743.595 209.051  28
   1  -4 -17 430.255 148.685  29
  -1   4  17 289.182 209.964  33
   1  -4 -17 237.440 177.779   5
  -1   4  17 160.508 171.201  12
   1  -4 -16 8385.74 670.959   5
  -1   4  16 8750.70 758.408  33
   1  -4 -16 6499.43 701.713  34
  -1   4  16 8902.03 922.723  30
  -1   4  16 8683.31 693.593  31
   1  -4 -15 474.896 260.996  34
  -1   4  15 592.359 209.440  31
  -1   4  15 656.458 247.542  30
   1  -4 -15 1021.35 263.167   5
   1  -4 -14 862.630 236.279   5
   1  -4 -14 593.102 251.824  34
  -1   4  14 461.923 297.653  30
  -1   4  14 345.315 188.202  31
  -1   4  13 1954.19 421.852  30
   1  -4 -13 1316.98 316.788  34
   1  -4 -13 1443.22 288.439   5
  -1   4  13 1837.98 299.640  31
  -1   4  13 1256.85 206.409   8
   1  -4 -12 5481.20 573.991  34
   1  -4 -12 5317.27 449.433   5
  -1   4  12 4653.44 597.902  30
  -1   4  12 5149.74 385.289   8
  -1   4  12 4536.89 429.020  31
  -1   4  11 439.928 149.000   8
  -1   4  11 470.422 259.833  30
   1  -4 -11 906.934 268.911  34
   1  -4 -11 557.125 174.669   5
  -1   4  11 402.764 155.071  31
  -1   4  10 5553.31 565.380  30
   1  -4 -10 4938.38 408.112   5
  -1   4  10 5399.54 354.169   8
   1  -4 -10 4891.18 506.537  34
  -1   4  10 5220.45 405.736  31
   1  -4  -9 90.0992 175.525  34
  -1   4   9 70.3305 119.475  31
   1  -4  -9 40.2530 116.904   5
  -1   4   9 189.979 178.997  30
  -1   4   9 39.7727 118.096   8
  -1   4   8 4683.77 454.317  30
  -1   4   8 4330.35 340.384  31
   1  -4  -8 4251.29 332.896   5
  -1   4   8 4458.28 297.019   8
   1  -4  -8 3762.63 407.880  34
  -1   4   7 1404.00 198.845  31
  -1   4   7 1175.25 158.825   8
   1  -4  -7 1389.49 255.007  34
  -1   4   7 1346.67 259.744  30
   1  -4  -7 836.956 88.4576   6
   1  -4  -7 1349.13 189.827   5
   1  -4  -6 6070.45 458.088  34
  -1   4   6 5939.33 285.864  36
  -1   4   6 6453.91 356.611  31
   1  -4  -6 5790.08 365.682   2
  -1   4   6 6711.46 486.347  30
   1  -4  -6 5860.75 322.232   5
  -1   4   6 5975.82 304.974   8
   1  -4  -5 19207.6 774.544  34
  -1   4   5 17512.4 594.576  31
   1  -4  -5 18587.0 565.652   5
  -1   4   5 18004.2 524.904  36
   1  -4  -5 18365.5 630.818   2
  -1   4   5 17927.8 542.452   8
   1  -4  -4 392.482 39.0600   3
   1  -4  -4 484.042 114.160  35
   1  -4  -4 302.437 92.5578   2
  -1   4   4 339.584 84.1925  36
   1  -4  -4 433.435 97.8336   5
   1  -4  -4 578.998 161.440  34
  -1   4   4 404.915 121.286  31
   1  -4  -4 463.651 138.639   7
   1  -4  -3 13627.4 568.641  34
   1  -4  -3 13675.1 522.522   7
   1  -4  -3 13376.4 401.635   5
  -1   4   3 14320.5 459.689  36
   1  -4  -3 13910.9 313.584   3
   1  -4  -3 12887.7 474.434  35
   1  -4  -3 13131.6 460.979   2
  -1   4   3 13977.0 481.452  31
   1  -4  -2 50951.9 1062.65   2
   1  -4  -2 49916.9 1138.37   7
   1  -4  -2 51525.0 921.107   3
  -1   4   2 48684.1 1101.50  31
   1  -4  -2 52016.2 1190.84  34
   1  -4  -2 50310.0 1163.51  35
   1  -4  -2 51196.8 953.288   5
   1  -4  -1 16551.0 393.832   5
   1  -4  -1 17725.6 570.260  34
   1  -4  -1 17455.3 456.879   3
   1  -4  -1 17296.1 658.022  35
   1  -4  -1 17237.4 491.961  33
   1  -4  -1 16953.9 490.464   2
   1  -4   0 13960.0 422.732   2
   1  -4   0 13473.8 410.910   3
  -1   4   0 14496.6 462.817  32
   1  -4   0 14271.0 441.719  33
   1  -4   0 14179.6 446.098  34
   1  -4   0 14852.1 591.605  35
   1  -4   1 16164.1 487.852   3
   1  -4   1 16877.7 655.733  35
   1  -4   1 16276.8 513.230  33
  -1   4  -1 17184.5 487.908  32
   1  -4   2 26036.8 878.308  35
  -1   4  -2 25613.2 644.206  32
   1  -4   2 27500.2 690.300   3
   1  -4   2 27127.5 751.448  33
   1  -4   3 13424.1 478.030   3
  -1   4  -3 13096.8 519.061   1
  -1   4  -3 12839.9 417.879  32
  -1   4  -3 12749.2 285.069   5
   1  -4   3 13550.0 629.427  35
   1  -4   3 13666.7 536.984  33
   1  -4   4 53286.5 986.152  30
  -1   4  -4 55419.9 1288.06   1
   1  -4   4 56405.0 1350.81  33
   1  -4   4 54248.8 1471.34  35
  -1   4  -4 53674.1 1122.39  32
  -1   4  -4 54796.8 961.143   5
   1  -4   4 56051.8 1551.51   6
  -1   4  -5 29655.8 765.414  32
   1  -4   5 29534.6 967.355  33
  -1   4  -5 29388.9 633.666   5
  -1   4  -5 28902.2 880.914   1
   1  -4   5 28321.5 1083.96   6
   1  -4   5 27843.5 1020.45  35
   1  -4   5 29957.5 685.716  30
   1  -4   6-87.6432 135.735  33
  -1   4  -6 132.960 95.1499  32
  -1   4  -6-57.1132 115.320   1
  -1   4  -6 0.92754 65.3627   5
   1  -4   6 53.2364 79.7069  30
   1  -4   6 23.1057 169.644  35
   1  -4   6 262.647 193.718   6
  -1   4  -7 518.368 98.8139   5
  -1   4  -7 351.752 148.673   1
   1  -4   7 414.348 188.976  35
   1  -4   7 491.835 193.217  33
  -1   4  -7 589.181 117.616  32
   1  -4   7 394.357 101.215  30
   1  -4   7 829.190 243.155   6
   1  -4   8 700.458 224.008  35
  -1   4  -8 478.921 141.821  32
   1  -4   8 856.055 233.945  33
  -1   4  -8 755.730 186.243   1
   1  -4   8 749.503 220.015   6
   1  -4   8 698.986 146.444  30
  -1   4  -8 558.670 116.634   5
  -1   4  -9 378.382 106.350  32
  -1   4  -9 613.174 183.445   1
   1  -4   9 541.521 224.064  35
   1  -4   9 637.939 249.375   6
   1  -4   9 508.463 196.408  33
  -1   4  -9 614.743 116.455   5
  -1   4 -10 3020.66 306.352   1
  -1   4 -10 2809.92 290.949  32
   1  -4  10 2764.61 408.618  33
   1  -4  10 2771.42 378.087  35
  -1   4 -10 3405.66 276.911   5
   1  -4  10 3159.14 422.288   6
   1  -4  11-134.526 177.620  33
  -1   4 -11 91.7028 126.167   1
  -1   4 -11 96.6174 92.0334  32
   1  -4  11 176.582 245.514  35
   1  -4  12 360.464 198.032  33
  -1   4 -12 84.7824 115.383   1
   1  -4  12 94.1397 172.515  35
  -1   4 -12 221.144 140.471  32
   1  -4  13 276.875 191.074  33
  -1   4 -13 219.552 153.630   1
  -1   4 -13-40.4272 129.435  32
  -1   4 -14 222.013 162.255  32
   1  -4  14 265.063 253.453  33
  -1   4 -14 217.554 148.803   1
   1  -4  15-82.5715 169.756  22
  -1   4 -15 261.278 155.298  32
   1  -4  15 219.296 268.456  33
  -1   4 -15 487.190 186.493   1
   1  -4  15 39.8722 137.915  12
   1  -4  15 238.659 161.603  15
   1  -4  15 440.456 198.334  19
  -1   4 -16 65.3488 146.956  28
   1  -4  16 436.295 155.971  15
   1  -4  16 452.752 215.658  22
   1  -4  16 498.086 281.856  33
   1  -4  16 479.141 175.045  12
   1  -4  17 635.555 234.694  22
   1  -4  17 899.308 208.871  12
  -1   4 -17 858.887 203.258  28
   1  -4  17 658.202 195.863  15
   1  -4  18-77.3372 197.292  22
  -1   4 -18 374.856 196.359  28
   1  -4  18 43.6925 158.431  12
  -1   4 -19 215.151 172.602  28
   1  -4  19-213.893 188.388  22
   1  -4  19-185.402 164.338  12
   1  -4  20 491.867 196.828  22
   1  -4  20 1020.18 226.180  12
  -1   4 -20 422.459 188.740  28
  -1   4 -21 857.755 218.801  28
   1  -4  21 1037.93 229.722  22
   1  -4  21 877.220 194.206  12
   1  -4  22-35.9769 125.205  12
   1  -4  22 235.520 165.626  22
  -1   4 -22 72.0490 156.669  28
  -1   4 -23 248.466 124.833  28
   1  -4  23 356.689 127.031  12
  -1   4 -24 556.236 129.181  28
   1  -4  24 555.343 115.666  12
  -1   3  26-141.205 97.9461  10
  -1   3  26-191.409 102.418  12
  -1   3  25-122.367 126.079  12
  -1   3  25-121.798 120.028  10
  -1   3  24-133.324 142.119  12
  -1   3  23 250.255 174.907  12
  -1   3  22-82.6958 176.504  12
   1  -3 -21 1289.13 225.135  28
  -1   3  21 1449.48 280.327  12
  -1   3  20-2.97204 185.911  12
   1  -3 -20-90.8424 141.083  28
  -1   3  19 717.938 218.364  12
   1  -3 -19 885.686 212.281  28
   1  -3 -19 864.244 149.259  29
   1  -3 -18 22.1500 193.212   5
   1  -3 -18 35.1227 133.783  28
  -1   3  18 811.614 381.863  30
  -1   3  18 93.0856 156.960  12
  -1   3  18 304.439 297.556  33
   1  -3 -18 306.106 121.525  29
  -1   3  18-66.0091 211.626  31
   1  -3 -17 905.476 199.475  28
  -1   3  17 924.055 227.723  12
  -1   3  17 1439.96 438.082  30
  -1   3  17 864.674 280.888  31
   1  -3 -17 350.202 166.445  34
   1  -3 -17 573.493 125.040  29
   1  -3 -17 419.355 215.038   5
  -1   3  17 523.397 293.553  33
  -1   3  16-402.850 230.719  31
   1  -3 -16-161.678 151.757   5
  -1   3  16-8.24698 175.485  33
  -1   3  16 139.445 244.442  30
   1  -3 -16 65.6056 180.032  34
   1  -3 -15 152.648 165.086  34
   1  -3 -15 33.6592 148.769   5
  -1   3  15 54.5260 177.652  31
  -1   3  15 137.707 234.064  30
   1  -3 -14 262.518 152.777   5
   1  -3 -14 384.819 211.453  34
  -1   3  14 99.6916 239.513  30
  -1   3  14 402.471 200.457  31
   1  -3 -13 3506.68 479.918  34
  -1   3  13 3060.69 512.524  30
   1  -3 -13 3247.95 375.466   5
  -1   3  13 3158.40 423.711  31
   1  -3 -12 209.134 144.603   5
  -1   3  12 493.795 267.639  30
  -1   3  12 335.814 117.810   8
  -1   3  12 123.809 136.454  31
   1  -3 -12-48.1781 156.893  34
   1  -3 -11 13982.4 838.102  34
  -1   3  11 14178.7 933.614  30
   1  -3 -11 14600.8 704.233   5
  -1   3  11 14609.0 739.064  31
  -1   3  11 13493.4 583.423   8
  -1   3  10 173.263 100.589   8
  -1   3  10 351.830 157.046  31
   1  -3 -10 257.992 185.235  34
   1  -3 -10 384.277 173.693   5
  -1   3  10 455.740 229.710  30
  -1   3   9-58.9339 192.919  30
  -1   3   9-124.294 163.933  31
  -1   3   9 180.397 126.976   8
   1  -3  -9 16.7235 61.9594   1
   1  -3  -9 108.608 192.800  34
   1  -3  -9 111.829 125.404   5
   1  -3  -8 2585.32 257.906   5
   1  -3  -8 2919.80 346.984  34
  -1   3   8 2500.17 363.744  30
  -1   3   8 2633.95 282.232  31
  -1   3   8 2501.50 223.664   8
  -1   3   7 1129.56 266.059  30
  -1   3   7 1028.22 153.389   8
   1  -3  -7 704.131 155.620   5
   1  -3  -7 1077.16 233.337  34
  -1   3   7 768.229 152.336  31
   1  -3  -6 219.559 112.281   5
   1  -3  -6 55.3372 99.5659   2
   1  -3  -6 215.600 153.716  34
  -1   3   6 139.403 85.9989   8
  -1   3   6 217.199 100.312  31
   1  -3  -5 2173.18 217.346   2
  -1   3   5 2468.36 161.880  36
  -1   3   5 2217.19 202.590  31
   1  -3  -5 2306.43 243.889  34
  -1   3   5 2643.19 191.024   8
   1  -3  -5 2421.63 193.520   5
   1  -3  -4 3073.00 245.741   7
   1  -3  -4 2649.23 225.166   2
   1  -3  -4 2737.69 191.973   5
   1  -3  -4 2372.32 146.215  35
  -1   3   4 2576.97 213.505  31
  -1   3   4 2689.33 167.878  36
   1  -3  -3 596.480 106.071  35
  -1   3   3 858.351 140.613  31
   1  -3  -3 596.393 159.034  34
   1  -3  -3 636.974 42.2817   3
  -1   3   3 663.796 98.4727  36
   1  -3  -3 652.102 119.085   2
   1  -3  -3 667.363 94.4460   5
   1  -3  -3 922.821 150.842   7
   1  -3  -2 25913.5 727.519  34
   1  -3  -2 26935.6 554.991   5
  -1   3   2 25156.5 655.468  31
   1  -3  -2 25081.6 635.226   2
   1  -3  -2 26650.7 485.907   3
   1  -3  -2 26016.5 670.090   7
   1  -3  -2 24380.5 644.527  35
   1  -3  -1 238.004 101.152   2
   1  -3  -1 266.410 120.719  35
   1  -3  -1 210.690 91.5758  33
   1  -3  -1 176.223 63.3382   5
   1  -3  -1 220.237 97.0466   7
   1  -3  -1 292.214 68.9229   3
   1  -3  -1 158.961 110.725  34
   1  -3   0 6512.61 342.528  35
   1  -3   0 6479.18 270.498  34
   1  -3   0 7036.52 247.376   3
   1  -3   0 6692.54 260.002   2
   1  -3   0 6131.69 264.591  33
   1  -3   1 15074.1 472.960  33
  -1   3  -1 15309.6 405.428  32
   1  -3   1 16023.3 433.169   3
  -1   3  -2 3911.09 102.185   5
  -1   3  -2 4472.84 197.488  32
   1  -3   2 4233.03 262.240  33
  -1   3  -2 4487.96 264.070   1
   1  -3   2 4455.55 224.371   3
  -1   3  -3 29134.4 530.171   5
   1  -3   3 28067.1 793.657  33
  -1   3  -3 28819.8 757.211   1
  -1   3  -3 29098.1 641.222  32
   1  -3   3 28267.2 604.320  30
  -1   3  -4 6645.76 277.649  32
   1  -3   4 6375.03 378.017  33
  -1   3  -4 6643.20 335.458   1
  -1   3  -4 5664.30 199.905  34
  -1   3  -4 6721.51 218.571   5
   1  -3   4 6373.89 267.693  30
   1  -3   4 6459.57 412.393  35
  -1   3  -5 1334.32 117.563   5
   1  -3   5 1682.96 241.634   6
   1  -3   5 1751.00 251.602  35
   1  -3   5 1440.24 148.988  30
  -1   3  -5 1225.66 183.249   1
  -1   3  -5 1154.37 135.574  32
  -1   3  -5 1074.06 97.4620  34
   1  -3   5 1649.78 231.159  33
   1  -3   6 9358.53 571.495   6
  -1   3  -6 9769.94 450.047   1
  -1   3  -6 9156.53 381.726  32
  -1   3  -6 8302.30 297.042  34
   1  -3   6 9700.12 555.810  35
  -1   3  -6 9747.61 341.072   5
   1  -3   6 9739.04 549.367  33
   1  -3   6 10155.1 436.758  30
   1  -3   7 1307.55 242.190  33
  -1   3  -7 766.775 142.955  32
  -1   3  -7 833.139 149.795   1
  -1   3  -7 1064.89 117.606  34
   1  -3   7 1182.63 252.503   6
   1  -3   7 1292.55 190.197  30
   1  -3   7 1389.51 258.014  35
  -1   3  -7 1041.12 132.409   5
   1  -3   8 714.950 249.822  33
  -1   3  -8 529.493 147.741   1
  -1   3  -8 302.928 125.337  32
  -1   3  -8 355.734 115.399   5
   1  -3   8 394.604 195.644  35
   1  -3   8 506.431 157.030  30
   1  -3   8 748.451 231.301   6
   1  -3   9 1722.57 311.748   6
   1  -3   9 1341.03 233.326  30
  -1   3  -9 1544.81 209.802   1
  -1   3  -9 1469.17 176.953   5
  -1   3  -9 1165.45 186.354  32
   1  -3   9 1511.24 311.719  33
   1  -3   9 1185.71 253.297  35
   1  -3  10 139.899 115.290  30
  -1   3 -10-55.2610 113.107   1
  -1   3 -10 104.110 93.4042   5
   1  -3  10 91.5330 171.490   6
  -1   3 -10 37.1571 106.480  32
   1  -3  10 119.613 175.345  33
   1  -3  10-70.4882 192.798  35
  -1   3 -11 2811.51 288.835   1
   1  -3  11 2972.72 423.614  33
  -1   3 -11 3151.57 288.563   5
  -1   3 -11 2930.74 303.878  32
   1  -3  11 2481.96 314.332  30
   1  -3  11 2784.93 384.038  35
  -1   3 -12 10569.5 609.693  32
  -1   3 -12 11506.3 594.791   1
   1  -3  12 11937.7 728.759  30
   1  -3  12 11728.3 752.890  35
  -1   3 -12 12583.9 611.013   5
   1  -3  12 11578.1 839.418  33
  -1   3 -13 5629.65 463.342  32
   1  -3  13 6425.79 678.356  33
  -1   3 -13 6382.16 448.355   1
  -1   3 -13 6795.70 464.805   5
  -1   3 -14 2108.69 281.785   1
  -1   3 -14 1426.46 267.202  32
   1  -3  14 2203.60 457.278  33
   1  -3  15 242.896 226.145  33
  -1   3 -15-48.8560 147.012   1
   1  -3  16 46.6403 155.350  19
   1  -3  16 363.307 150.896  12
   1  -3  16 194.663 154.983  15
   1  -3  16 136.740 220.214  33
   1  -3  16-114.545 155.350  22
  -1   3 -16 435.554 165.915  28
   1  -3  17 566.130 217.804  22
   1  -3  17 70.4790 144.430  12
  -1   3 -17-156.962 148.776  28
   1  -3  17 150.278 157.003  15
   1  -3  17 892.009 360.882  33
   1  -3  18 172.942 158.184  12
   1  -3  18 190.318 180.356  22
  -1   3 -18 143.086 164.440  28
  -1   3 -19 12.3320 157.911  28
   1  -3  19 399.206 197.454  22
   1  -3  19 306.596 153.082  12
   1  -3  20 386.102 195.229  22
  -1   3 -20 48.8212 143.831  28
   1  -3  20 288.653 183.913  12
   1  -3  21 191.511 171.424  22
   1  -3  21 84.9906 171.026  12
  -1   3 -21-12.4691 147.139  28
   1  -3  22 366.990 156.566  12
   1  -3  22 490.364 187.061  22
  -1   3 -22 310.744 158.686  28
   1  -3  23 281.570 145.482  12
  -1   3 -23 459.427 170.302  28
   1  -3  23 60.7362 132.248  22
  -1   3 -24 2397.18 231.554  28
   1  -3  24 2588.49 231.061  12
   1  -3  25 572.320 110.249  12
  -1   3 -25 588.204 121.478  28
  -1   2  26 436.210 117.104  12
  -1   2  26 471.060 107.875  10
  -1   2  25 319.250 126.904  10
  -1   2  25 443.135 151.803  12
  -1   2  24 79.0706 123.985  10
  -1   2  24 218.243 152.995  12
  -1   2  23 662.154 198.159  12
  -1   2  22-78.6785 156.578  12
   1  -2 -22-30.9897 135.406  28
   1  -2 -21 803.942 197.097  28
  -1   2  21 1022.07 251.880  12
   1  -2 -20 1525.94 247.693  28
  -1   2  20 1074.66 246.436  12
   1  -2 -19 3603.58 352.718  28
  -1   2  19 3989.85 400.789  12
   1  -2 -18 237.773 174.482   5
  -1   2  18 158.806 191.482  12
   1  -2 -18 278.261 142.119  28
  -1   2  18 173.871 244.391  30
  -1   2  18-134.634 219.650  33
  -1   2  17 704.794 364.699  30
  -1   2  17 230.393 224.592  31
   1  -2 -17 645.067 204.324  28
  -1   2  17 173.612 150.261  12
  -1   2  17 251.224 207.782  33
   1  -2 -17 995.859 295.949   5
  -1   2  16 3981.89 519.599  31
   1  -2 -16 4201.68 523.270  34
  -1   2  16 4050.86 553.596  33
   1  -2 -16 4391.99 504.338   5
  -1   2  16 3743.21 583.479  30
   1  -2 -15 8935.82 727.588  34
  -1   2  15 8599.23 858.844  30
   1  -2 -15 8357.15 634.221   5
  -1   2  15 7835.30 691.857  31
   1  -2 -14-10.2042 138.927   5
   1  -2 -14 416.136 224.213  34
  -1   2  14 506.977 214.528  31
  -1   2  14 360.037 280.403  30
  -1   2  13 284.956 214.223  30
   1  -2 -13 705.784 210.839   5
  -1   2  13 297.077 145.901  31
   1  -2 -13 672.870 242.016  34
  -1   2  12 695.856 280.548  30
   1  -2 -12 869.519 246.938  34
   1  -2 -12 794.412 206.166   5
  -1   2  12 356.513 194.492  31
   1  -2 -11 344.378 142.112   5
  -1   2  11 678.359 272.827  30
  -1   2  11 238.212 141.592  31
   1  -2 -11 425.534 145.961  34
   1  -2 -10 9550.29 525.651  32
   1  -2 -10 10150.5 541.803   5
  -1   2  10 9425.54 561.143  31
   1  -2 -10 9902.08 665.951  34
  -1   2  10 9638.00 713.696  30
  -1   2  10 9319.73 440.561   8
   1  -2  -9 14234.9 611.636  32
  -1   2   9 14587.1 666.775  31
   1  -2  -9 13520.5 609.084   5
   1  -2  -9 13764.4 417.487   1
  -1   2   9 14305.3 826.930  30
   1  -2  -9 14247.2 750.823  34
  -1   2   9 14032.1 524.520   8
  -1   2   8 1685.39 303.898  30
  -1   2   8 1742.39 176.278   8
  -1   2   8 1492.18 219.806  31
   1  -2  -8 1751.27 131.898   1
   1  -2  -8 1477.30 250.215  34
   1  -2  -8 1565.57 213.226   5
   1  -2  -8 1739.81 211.282  32
   1  -2  -7 10793.2 313.123   1
   1  -2  -7 10991.3 469.726   5
  -1   2   7 10398.1 629.315  30
   1  -2  -7 10649.8 591.057  34
  -1   2   7 10130.6 394.898   8
   1  -2  -7 10555.2 453.563  32
  -1   2   7 9889.84 506.140  31
  -1   2   6 5682.97 347.179  31
  -1   2   6 5574.73 275.642   8
   1  -2  -6 5675.02 305.185  32
   1  -2  -6 5603.13 314.383   5
   1  -2  -6 6176.63 422.715  34
   1  -2  -6 5846.55 203.178   1
   1  -2  -5 5482.65 289.857   5
   1  -2  -5 5251.76 264.984  32
   1  -2  -5 5327.93 313.121   2
  -1   2   5 5530.11 322.170  31
   1  -2  -5 5433.38 189.784   1
   1  -2  -4 42789.2 982.724   2
   1  -2  -4 44566.4 893.654  32
   1  -2  -4 44431.8 923.624   5
  -1   2   4 43052.9 983.561  31
   1  -2  -3 22631.5 587.563   2
  -1   2   3 22776.9 595.648  31
   1  -2  -3 22086.5 527.934   5
  -1   2   3 22637.4 471.906  36
  -1   2   2 8212.05 316.350  31
  -1   2   2 8528.38 249.083  36
   1  -2  -2 9218.46 272.730  35
   1  -2  -2 8906.75 265.172   5
   1  -2  -2 9047.97 312.024   2
   1  -2  -1 42303.8 841.663   2
   1  -2  -1 42253.3 839.858  33
   1  -2  -1 42522.6 859.680  35
   1  -2  -1 43539.7 740.808   5
   1  -2  -1 44398.0 787.862   4
   1  -2  -1 42900.9 839.484   7
   1  -2  -1 43447.0 904.856  34
   1  -2   0 127667. 2069.60  34
   1  -2   0 121564. 1886.24   5
   1  -2   0 124591. 2065.67  33
   1  -2   0 128287. 1936.17   4
  -1   2  -1 39139.4 699.274  32
  -1   2  -1 38112.9 792.849   1
  -1   2  -2 18012.7 489.846   1
   1  -2   2 18465.7 425.581  30
  -1   2  -2 17503.8 313.690   5
  -1   2  -2 19140.2 395.866  32
   1  -2   2 17968.7 523.274  33
   1  -2   3 49732.1 1098.94  33
  -1   2  -3 50680.2 851.506   5
   1  -2   3 49203.7 974.418  30
  -1   2  -3 49042.7 1036.15   1
  -1   2  -3 51408.7 923.461  32
  -1   2  -4 145429. 2367.48  34
   1  -2   4 144449. 2468.30  30
  -1   2  -4 146708. 2497.56   1
  -1   2  -4 148418. 2307.94   5
   1  -2   4 143719. 2640.84  35
  -1   2  -4 152091. 2384.83  32
   1  -2   5 59667.1 1384.72  33
  -1   2  -5 56721.4 1125.71  32
   1  -2   5 58046.7 1354.75  35
   1  -2   5 58534.1 1253.36  30
  -1   2  -5 58494.0 1083.00   5
  -1   2  -5 57292.6 1127.63  34
  -1   2  -5 56026.1 1209.72   1
   1  -2   6 4796.39 364.782   6
   1  -2   6 5089.56 359.253  35
  -1   2  -6 5093.05 247.053   5
  -1   2  -6 4774.42 260.154  32
  -1   2  -6 4671.83 290.566   1
   1  -2   6 5100.98 333.956  30
   1  -2   6 4788.70 368.690  33
  -1   2  -6 4808.12 263.568  34
  -1   2  -7 304.437 111.387  32
   1  -2   7 353.537 129.636  30
  -1   2  -7 391.608 112.456  34
   1  -2   7 593.000 192.682  33
   1  -2   7 519.992 167.915   6
  -1   2  -7 350.401 103.136   5
  -1   2  -7 360.427 121.212   1
   1  -2   7 628.039 152.813  35
   1  -2   8 409.197 179.220  33
  -1   2  -8 399.612 117.835  32
  -1   2  -8 317.999 113.524   5
   1  -2   8 418.659 173.856  30
   1  -2   8 344.981 124.959   6
   1  -2   8 404.710 143.886  35
  -1   2  -8 174.596 101.077  34
  -1   2  -8 311.899 127.962   1
   1  -2   9 432.055 197.124  33
  -1   2  -9 337.962 123.422   1
   1  -2   9 676.741 174.034  35
  -1   2  -9 481.372 129.384  34
  -1   2  -9 351.323 120.196  32
   1  -2   9 635.669 199.151  30
   1  -2   9 517.898 190.572   6
  -1   2  -9 446.939 126.639   5
  -1   2 -10-58.2646 108.293  34
   1  -2  10 62.3941 139.860  30
  -1   2 -10-107.552 117.598  32
   1  -2  10 170.070 144.370   6
  -1   2 -10 50.5512 100.412   1
   1  -2  10 331.803 191.873  33
   1  -2  10 58.9275 145.279  35
  -1   2 -10 30.4248 104.861   5
  -1   2 -11 7300.38 431.396   1
  -1   2 -11 7266.30 447.243   5
  -1   2 -11 6292.53 425.158  32
   1  -2  11 6617.02 580.689  33
   1  -2  11 7386.39 573.975  30
   1  -2  11 6573.24 506.813  35
   1  -2  12 666.635 244.814  30
  -1   2 -12 719.402 180.166   5
   1  -2  12 766.945 270.914  33
  -1   2 -12 586.994 171.155  32
  -1   2 -12 644.100 169.758   1
   1  -2  12 803.501 225.639  35
   1  -2  13-130.817 172.724  33
  -1   2 -13 130.347 124.900   1
   1  -2  13 37.8481 149.401  30
  -1   2 -13-12.4187 123.550  32
  -1   2 -13 11.1528 127.732   5
  -1   2 -14 862.617 189.518   1
   1  -2  14 1167.53 308.623  30
  -1   2 -14 652.638 175.114  32
   1  -2  14 1118.04 351.150  33
  -1   2 -14 1102.94 237.945   5
  -1   2 -15 267.617 149.539   1
   1  -2  15 447.662 258.174  33
  -1   2 -15 513.862 194.911   5
  -1   2 -16 275.305 148.762  28
   1  -2  16 138.593 166.038  22
   1  -2  16 310.032 185.522  19
   1  -2  16 414.830 165.404  12
   1  -2  16 484.965 196.125  15
   1  -2  16 645.462 317.678  33
   1  -2  17 235.954 187.230  22
   1  -2  17-123.899 256.661  33
  -1   2 -17 73.9482 144.480  28
   1  -2  17 27.3596 153.109  12
  -1   2 -18 205.130 171.802  28
   1  -2  18 347.349 196.276  12
   1  -2  18-27.8175 158.956  22
  -1   2 -19 66.9655 143.202  28
   1  -2  19-87.3884 170.617  22
   1  -2  19-30.5274 165.080  12
   1  -2  20 454.006 187.099  22
  -1   2 -20 239.132 157.953  28
   1  -2  20 71.1558 158.831  12
   1  -2  21 971.866 236.460  22
  -1   2 -21 852.933 221.619  28
   1  -2  21 799.327 216.647  12
   1  -2  22 928.907 214.142  12
  -1   2 -22 689.351 191.768  28
   1  -2  22 687.615 203.560  22
   1  -2  23 239.670 146.840  22
   1  -2  23 364.324 171.281  12
  -1   2 -23 181.942 129.393  28
   1  -2  24 252.466 145.733  12
  -1   2 -24 372.105 135.910  28
   1  -2  25-53.2979 91.4271  12
  -1   2 -25 70.2268 107.529  28
  -1   1  26 559.729 131.158  12
  -1   1  26 496.592 99.0669  10
  -1   1  25-8.97343 116.541  12
  -1   1  25 105.127 99.1887  10
  -1   1  24 475.429 155.850  12
  -1   1  24 376.209 123.963  10
  -1   1  23 668.354 206.959  10
   1  -1 -23 485.792 154.334  28
  -1   1  23 605.683 208.328  12
   1  -1 -22 155.150 135.645  28
  -1   1  22-95.2989 158.222  12
  -1   1  21 247.280 212.463  12
   1  -1 -21 467.981 176.229  28
  -1   1  20 131.023 160.799  12
   1  -1 -20 153.925 153.746  28
   1  -1 -19 325.168 178.214  28
  -1   1  19 343.760 189.862  12
  -1   1  18 12473.1 1065.86  30
  -1   1  18 12410.5 677.824  12
   1  -1 -18 11349.7 614.138  28
  -1   1  17 5804.83 680.212  33
  -1   1  17 5537.65 664.311  31
  -1   1  17 5825.23 454.996  12
  -1   1  17 6533.82 797.356  30
   1  -1 -17 6243.13 573.357   5
   1  -1 -17 5989.29 433.811  28
  -1   1  16 644.863 315.102  30
  -1   1  16 783.102 283.187  31
   1  -1 -16 1185.60 280.677   5
  -1   1  16 683.764 306.497  33
  -1   1  16 841.536 203.817  12
  -1   1  15 2951.61 469.666  31
   1  -1 -15 2458.80 386.230  34
  -1   1  15 2490.97 472.919  30
   1  -1 -15 2590.62 373.964   5
   1  -1 -14 650.689 225.880  34
  -1   1  14 275.819 201.010  30
  -1   1  14 373.560 233.339  31
   1  -1 -14 440.955 209.974   5
  -1   1  13 1936.17 364.646  31
   1  -1 -13 2433.77 362.875  34
   1  -1 -13 2104.00 306.078   5
  -1   1  13 2513.28 482.515  30
   1  -1 -12 53.1693 116.502  32
  -1   1  12-96.1875 147.763  31
  -1   1  12-23.3831 187.285  30
   1  -1 -12 151.288 135.619  34
   1  -1 -12 133.053 161.054   5
   1  -1 -11 8504.56 626.076  34
   1  -1 -11 9459.52 557.610   5
  -1   1  11 9983.41 771.507  30
  -1   1  11 9873.79 640.760  31
   1  -1 -11 9703.72 555.686  32
   1  -1 -10 10972.5 546.442  32
  -1   1  10 10233.2 724.926  30
   1  -1 -10 10871.2 563.201   5
  -1   1  10 10618.4 632.925  31
   1  -1 -10 10512.4 381.165   1
   1  -1 -10 10998.9 666.513  34
   1  -1  -9-4.47653 123.002  32
   1  -1  -9 93.2798 71.1672   1
   1  -1  -9-13.2231 144.247  34
  -1   1   9 109.612 215.782  30
  -1   1   9 47.7330 134.581  31
   1  -1  -9 12.2838 133.473   5
  -1   1   8 215.204 188.791  30
   1  -1  -8 124.011 145.383  34
   1  -1  -8 148.745 67.6491   1
   1  -1  -8 91.1855 113.783  32
   1  -1  -8 224.581 141.930   5
  -1   1   8 117.815 89.7827   8
  -1   1   8 102.107 119.028  31
   1  -1  -7 573.552 80.3569   1
  -1   1   7 642.353 165.396  31
   1  -1  -7 579.753 179.316  34
  -1   1   7 546.802 121.832   8
   1  -1  -7 510.896 120.041   5
   1  -1  -7 545.285 125.944  32
  -1   1   7 577.689 185.661  30
   1  -1  -6 1186.04 158.267  32
   1  -1  -6 1131.69 193.628  34
  -1   1   6 1372.69 143.293   8
  -1   1   6 1100.05 189.085  31
   1  -1  -6 1258.44 168.246   5
   1  -1  -6 1217.09 92.8650   1
   1  -1  -5 86.7163 103.968   5
   1  -1  -5 167.966 55.5068   1
   1  -1  -5 173.705 144.481  34
   1  -1  -5 355.489 136.637   2
  -1   1   5 117.244 79.4694   8
   1  -1  -5 292.224 109.390  32
  -1   1   5 218.976 133.199  31
   1  -1  -4 316.636 122.564   5
   1  -1  -4 318.664 51.8162   1
   1  -1  -4 586.014 117.972  32
  -1   1   4 441.750 132.011  31
   1  -1  -4 216.673 111.876   2
   1  -1  -4 342.625 128.047   4
   1  -1  -3 27941.9 614.250   2
  -1   1   3 27738.4 636.640  31
   1  -1  -3 27089.2 580.457   5
   1  -1  -3 27858.2 551.239  32
   1  -1  -3 28329.8 609.261   4
   1  -1  -2 3778.13 176.166   4
   1  -1  -2 4064.68 148.336  32
   1  -1  -2 3620.20 187.218   2
  -1   1   2 3556.55 188.541  31
   1  -1  -2 3667.99 113.226  35
   1  -1  -1 3630.02 162.359   2
   1  -1  -1 3808.08 114.359  32
  -1   1   1 3612.62 106.889  36
  -1   1   1 3512.99 97.0300   1
   1  -1  -1 3826.87 148.787   4
  -1   1   1 3649.62 178.515  31
   1  -1  -1 3961.74 135.210  35
  -1   1   0 10307.8 215.184   8
  -1   1   0 10141.7 234.592   1
   1  -1   0 9778.55 227.374   7
   1  -1   1 986.940 97.4122  33
  -1   1  -1 950.825 78.1312   1
  -1   1  -1 1040.77 43.8056   8
   1  -1   1 897.237 81.5900  30
  -1   1  -2 3176.59 99.6524   5
  -1   1  -2 3024.63 151.386   1
   1  -1   2 2835.98 152.938  30
  -1   1  -2 2912.99 105.957  32
   1  -1   2 2976.83 175.512  33
   1  -1   3 1319.37 152.305  33
   1  -1   3 1593.42 142.353  30
  -1   1  -3 1292.63 93.6869  32
  -1   1  -3 1417.70 89.3499   5
  -1   1  -3 1266.62 123.799   1
  -1   1  -4 1597.48 126.355   5
  -1   1  -4 1543.20 153.639  34
   1  -1   4 1626.25 189.003  30
  -1   1  -4 1596.82 161.323   1
   1  -1   4 1596.52 191.807  35
   1  -1   4 1461.35 193.662  33
  -1   1  -4 1670.21 132.107  32
   1  -1   5 23152.9 735.689  33
   1  -1   5 23524.7 719.412  30
  -1   1  -5 22603.7 639.741  34
   1  -1   5 22449.4 684.482  35
  -1   1  -5 24142.0 569.288   5
  -1   1  -5 23684.0 610.023   1
  -1   1  -5 24400.6 582.035  32
  -1   1  -6 55547.2 1094.52   5
  -1   1  -6 52349.4 1193.17  34
   1  -1   6 53200.1 1268.13   6
   1  -1   6 50301.1 1294.40  30
  -1   1  -6 53496.0 1118.62   1
   1  -1   6 52824.9 1233.38  35
  -1   1  -6 56896.1 1117.87  32
   1  -1   6 54921.4 1341.52  33
  -1   1  -7 35651.7 874.779  32
  -1   1  -7 36558.8 864.566   5
   1  -1   7 34467.1 1057.80  30
  -1   1  -7 34585.7 953.539  34
  -1   1  -7 35451.0 865.257   1
   1  -1   7 35908.4 987.077  35
   1  -1   7 34703.3 1094.06  33
   1  -1   7 36053.9 1012.58   6
  -1   1  -8 14743.9 529.936  32
  -1   1  -8 14254.5 514.423   5
   1  -1   8 14010.6 598.672  35
  -1   1  -8 13722.0 504.383   1
   1  -1   8 14430.1 689.302  30
   1  -1   8 13811.6 601.848   6
   1  -1   8 14687.4 707.349  33
  -1   1  -8 12741.1 563.101  34
   1  -1   9 846.357 165.889  35
  -1   1  -9 886.176 170.140   5
   1  -1   9 914.049 226.965  30
  -1   1  -9 733.113 163.114  34
  -1   1  -9 895.676 153.010   1
   1  -1   9 768.723 188.486  33
  -1   1  -9 782.612 139.684  32
   1  -1   9 851.000 170.130   6
   1  -1  10 28802.0 1134.52  30
  -1   1 -10 27938.2 881.035   5
  -1   1 -10 26269.3 932.885  34
  -1   1 -10 27556.4 822.411   1
   1  -1  10 28010.3 964.784  35
  -1   1 -10 28305.5 881.141  32
   1  -1  10 26619.6 1121.50  33
   1  -1  11 8064.97 518.886  35
  -1   1 -11 8675.71 481.031   5
  -1   1 -11 8593.94 454.212   1
   1  -1  11 8363.91 643.142  33
  -1   1 -11 7693.30 475.237  32
  -1   1 -11 8313.80 524.674  34
   1  -1  11 8079.23 631.997  30
   1  -1  12 1433.97 291.297  30
  -1   1 -12 1579.24 238.315  32
  -1   1 -12 1649.51 250.470   5
  -1   1 -12 1364.63 197.105   1
   1  -1  12 1618.70 324.341  33
   1  -1  12 1726.91 262.436  35
  -1   1 -12 1186.17 224.375  34
   1  -1  13 1094.12 275.195  33
  -1   1 -13 998.742 180.857   1
  -1   1 -13 733.215 187.905  32
   1  -1  13 1097.82 314.197  30
  -1   1 -13 879.650 209.742   5
  -1   1 -14 1163.49 213.035   1
   1  -1  14 1423.77 347.894  33
   1  -1  14 1511.20 336.885  30
  -1   1 -14 1468.07 261.248   5
   1  -1  15 4562.07 562.776  30
  -1   1 -15 4497.17 431.099   5
   1  -1  15 4710.19 591.266  33
  -1   1 -15 4684.70 379.408   1
   1  -1  16 11125.3 878.793  30
   1  -1  16 11086.8 919.384  33
  -1   1 -16 11953.6 720.680   5
  -1   1 -17 7321.18 580.161   5
  -1   1 -17 6866.19 460.862  28
   1  -1  17 5917.69 420.322  22
   1  -1  17 6925.45 483.934  12
   1  -1  17 6899.58 754.171  33
   1  -1  18 3436.16 561.979  33
   1  -1  18 3501.33 337.979  22
   1  -1  18 3385.48 357.139  12
  -1   1 -18 4006.04 376.592  28
   1  -1  19 1346.05 232.608  22
  -1   1 -19 1527.48 265.522  28
   1  -1  19 1598.63 278.085  12
   1  -1  20 505.374 201.102  12
  -1   1 -20 469.524 189.630  28
   1  -1  20 628.628 193.887  22
  -1   1 -21 400.852 170.995  28
   1  -1  21 181.653 167.978  22
   1  -1  21 251.520 166.547  12
   1  -1  22 1059.04 227.005  12
  -1   1 -22 389.931 170.094  28
   1  -1  22 649.048 210.310  22
   1  -1  23 92.1914 135.580  22
   1  -1  23 242.295 163.699  12
  -1   1 -23 122.796 136.221  28
  -1   1 -24 561.745 152.377  28
   1  -1  24 264.521 146.269  12
   1  -1  24 357.093 139.026  22
  -1   1 -25 61.6131 96.2234  28
   1  -1  25 86.4493 118.188  12
   1  -1  26 187.057 89.7799  12
  -1   0  25 705.236 149.299  12
  -1   0  25 865.791 130.837  10
  -1   0  24 705.392 176.439  12
  -1   0  24 585.767 145.241  10
   1   0 -23 224.358 152.349  28
  -1   0  23 582.938 191.731  12
  -1   0  23 254.673 138.297  10
  -1   0  22 118.435 160.001  12
  -1   0  22-110.905 138.399  10
   1   0 -22 13.8244 137.556  28
  -1   0  21 95.6121 183.012  12
   1   0 -21 188.637 154.339  28
   1   0 -20 279.051 173.271  28
  -1   0  20 43.3769 183.595  12
  -1   0  19-127.620 177.982  12
   1   0 -19 532.752 192.168  28
   1   0 -18 135.543 153.751  28
  -1   0  18 351.228 181.471  12
   1   0 -17 2328.53 282.613  28
  -1   0  17 1819.85 429.882  30
   1   0 -17 2730.49 396.546   5
  -1   0  17 2397.88 474.992  33
  -1   0  17 1906.15 296.231  12
  -1   0  16 7111.30 770.903  33
  -1   0  16 7340.86 792.386  30
  -1   0  16 7186.58 488.668  12
   1   0 -16 7681.47 482.538  28
   1   0 -16 7481.59 612.141   5
  -1   0  16 6108.82 669.333  31
  -1   0  15 1474.53 346.393  31
  -1   0  15 1619.23 394.019  30
   1   0 -15 2062.83 329.176   5
  -1   0  14 189.489 193.477  30
   1   0 -14 202.628 127.294   5
  -1   0  14 20.9332 189.491  31
   1   0 -14 129.278 166.258  34
   1   0 -14 571.899 192.271  32
   1   0 -13 902.908 210.684   5
   1   0 -13 1298.89 240.777  32
   1   0 -13 1390.35 271.091  34
  -1   0  13 792.904 272.884  31
  -1   0  13 1350.98 342.788  30
  -1   0  12 232.584 196.823  30
   1   0 -12 105.927 114.340  32
  -1   0  12 281.033 188.165  31
   1   0 -12 99.0225 140.455  34
   1   0 -12 201.465 135.588   5
  -1   0  11 755.193 248.425  30
   1   0 -11 1043.32 208.801   5
  -1   0  11 902.080 227.961  31
   1   0 -11 1121.29 142.298   1
   1   0 -11 961.643 208.256  32
   1   0 -11 1133.73 242.112  34
   1   0 -10 2492.13 286.135   5
   1   0 -10 2630.22 191.107   1
  -1   0  10 2534.64 338.263  31
   1   0 -10 2315.27 308.466  34
  -1   0  10 2771.11 397.415  30
   1   0 -10 2524.37 281.739  32
   1   0  -9 1522.60 224.128   5
   1   0  -9 1515.99 249.617  34
  -1   0   9 985.529 220.190  31
   1   0  -9 1446.91 216.233  32
   1   0  -9 1387.23 145.593   1
  -1   0   9 1530.71 315.578  30
  -1   0   8 32996.4 1039.05  31
   1   0  -8 33121.2 937.755  32
   1   0  -8 32022.2 933.576   5
   1   0  -8 31143.5 1011.69  34
  -1   0   8 33034.4 1183.72  30
   1   0  -8 31867.6 720.576   1
   1   0  -7 20603.2 503.761   1
   1   0  -7 19856.7 652.539  32
   1   0  -7 20994.0 748.099  34
   1   0  -7 20363.8 666.625   5
  -1   0   7 19496.5 739.897  31
  -1   0   7 20682.0 860.504  30
  -1   0   6 16110.0 621.765  31
   1   0  -6 17273.1 646.395  34
   1   0  -6 16239.6 412.253   1
   1   0  -6 16318.3 561.720   5
  -1   0   6 15542.4 456.216  35
   1   0  -6 16954.5 553.007  32
   1   0  -5 294.512 131.380  34
   1   0  -5 377.603 128.297   5
  -1   0   5 280.984 153.522  31
   1   0  -5 421.709 135.875   4
   1   0  -5 366.259 129.192  32
  -1   0   5 224.307 80.3987   3
   1   0  -5 331.264 76.8234   1
  -1   0   4 145950. 2236.10   3
   1   0  -4 140807. 2360.08  32
   1   0  -4 148179. 2402.14   2
   1   0  -4 141339. 2485.72  34
  -1   0   4 143630. 2483.40  31
   1   0  -4 135784. 2202.47   1
   1   0  -4 138000. 2405.14   4
   1   0  -3 58520.1 1115.19   4
   1   0  -3 62016.8 1091.61  32
   1   0  -3 58041.4 1170.81  34
   1   0  -3 58274.1 962.432   1
   1   0  -3 58737.2 1105.93   2
  -1   0   3 59093.2 1166.93  31
  -1   0   3 58898.0 990.654   3
   1   0  -2 12217.8 345.723   4
  -1   0   2 12471.6 367.776  31
  -1   0   2 12050.8 266.259   3
   1   0  -2 12952.5 324.497  32
   1   0  -2 12654.0 333.386   2
   1   0  -1 13779.9 298.576  32
  -1   0   1 13324.0 271.510   3
   1   0  -1 14158.3 321.330   2
  -1   0   1 13366.8 352.529  31
   1   0   0 201881. 3113.53  32
   1   0   0 208525. 3198.55  33
  -1   0   0 211970. 3090.93   1
   1   0   1 62575.8 1070.51  33
  -1   0  -1 64065.7 1010.42   1
  -1   0  -2 4463.67 146.231   1
   1   0   2 4662.40 195.087  33
   1   0   2 4428.66 201.209  30
  -1   0  -2 4427.84 139.587   5
  -1   0  -3 8950.78 246.122  32
  -1   0  -3 8834.62 259.640   1
   1   0   3 8693.06 318.932  33
   1   0   3 8818.57 338.561  30
   1   0   3 8795.31 280.908  35
  -1   0  -3 9075.41 251.668   5
   1   0   4 95576.5 1518.05   8
  -1   0  -4 103483. 1643.44  32
  -1   0  -4 95468.5 1651.03   1
   1   0   4 102413. 1715.37  35
  -1   0  -4 93277.3 1777.17  34
   1   0   4 102047. 1818.41  33
   1   0   4 97055.7 1841.56  30
  -1   0  -4 100936. 1654.91   5
   1   0   5 33856.9 822.159  31
  -1   0  -5 33099.6 725.532   1
   1   0   5 33999.2 875.853  33
   1   0   5 34151.4 914.487  30
   1   0   5 31327.1 588.382   8
   1   0   5 33085.1 780.862  35
  -1   0  -5 30967.5 835.744  34
  -1   0  -5 32837.0 712.979  32
  -1   0  -5 31938.6 713.438   5
  -1   0  -6 89611.6 1630.17  32
  -1   0  -6 89199.8 1618.89   5
   1   0   6 86544.0 1661.30  35
   1   0   6 86593.9 1837.74  33
   1   0   6 87542.2 1895.33  30
  -1   0  -6 85189.7 1782.89  34
   1   0   6 87697.1 1452.24   8
  -1   0  -6 93011.4 1619.34   1
   1   0   6 88518.4 1766.17  31
   1   0   7 31235.4 810.749   6
   1   0   7 30684.4 888.371  31
  -1   0  -7 30614.3 774.643   5
  -1   0  -7 29757.2 904.018  34
   1   0   7 27644.7 604.218   8
   1   0   7 29751.0 937.572  33
  -1   0  -7 31049.6 751.360   1
   1   0   7 30223.1 806.366  35
  -1   0  -7 31019.5 781.366  32
   1   0   7 30970.8 1003.83  30
  -1   0  -8 286.286 114.140  32
   1   0   8 583.607 219.439  30
   1   0   8 275.460 153.789  33
   1   0   8 305.944 100.970   6
  -1   0  -8 179.587 104.674   5
  -1   0  -8 143.405 83.3077   1
   1   0   8 337.733 153.832  31
   1   0   8 256.586 112.998  35
  -1   0  -8 234.986 115.691  34
   1   0   9 80683.9 1662.23   6
   1   0   9 78487.1 1684.62  35
   1   0   9 78859.2 2036.67  30
   1   0   9 79429.9 1954.24  33
  -1   0  -9 77626.4 1589.89   1
  -1   0  -9 83416.1 1685.69  32
  -1   0  -9 81097.8 1687.49   5
   1   0   9 77402.6 1862.09  31
  -1   0  -9 76226.2 1863.14  34
  -1   0 -10 7018.19 369.813   1
  -1   0 -10 7094.17 500.315  34
   1   0  10 7450.94 593.240  30
   1   0  10 7066.00 541.494  33
  -1   0 -10 6422.74 405.673  32
   1   0  10 7307.76 420.372  35
  -1   0 -10 6903.96 415.658   5
   1   0  10 7224.93 495.540  31
   1   0  11 12423.4 768.088  33
  -1   0 -11 12924.9 608.001   5
  -1   0 -11 12879.3 537.909   1
  -1   0 -11 11930.2 601.091  32
   1   0  11 14191.6 834.548  30
   1   0  11 13226.6 712.548  31
  -1   0 -11 12180.4 688.289  34
   1   0  11 13486.2 591.331  35
   1   0  12 1623.45 324.313  33
  -1   0 -12 1633.81 250.483   5
  -1   0 -12 1499.43 287.446  34
   1   0  12 1326.64 314.145  30
  -1   0 -12 1563.23 208.469   1
  -1   0 -13 136.510 161.932  34
  -1   0 -13 86.2455 175.031   5
   1   0  13 160.108 209.427  33
  -1   0 -13 177.758 124.643   1
   1   0  13 371.438 277.926  30
  -1   0 -14 1408.20 214.106   1
  -1   0 -14 1403.12 287.680  34
  -1   0 -14 1846.62 295.862   5
   1   0  14 1671.22 364.269  33
   1   0  14 1312.78 345.024  30
  -1   0 -15 3531.17 323.478   1
   1   0  15 3642.77 522.600  33
  -1   0 -15 3396.62 381.230   5
   1   0  15 3596.27 510.917  30
   1   0  16 1026.75 312.856  33
   1   0  16 1500.36 402.714  30
  -1   0 -16 1249.56 258.656   5
   1   0  17 69.1671 158.629  22
  -1   0 -17-105.825 162.822  28
   1   0  17 94.7869 241.659  30
   1   0  17-187.527 177.111  12
  -1   0 -17 1.10885 158.576   5
   1   0  17-254.725 240.956  33
  -1   0 -18 987.398 262.790   5
   1   0  18 577.102 347.949  33
   1   0  18 351.057 184.369  12
  -1   0 -18 335.287 155.439  28
   1   0  18 318.955 241.021  30
   1   0  18 753.043 192.585  22
  -1   0 -19 601.392 185.927  28
   1   0  19 583.686 218.646  12
   1   0  19 582.433 194.540  22
   1   0  20 631.123 201.132  22
  -1   0 -20 514.279 199.995  28
   1   0  20 581.255 198.500  12
   1   0  21 2149.24 288.783  22
  -1   0 -21 3004.81 342.445  28
   1   0  21 2712.84 332.187  12
   1   0  22 47.2095 168.313  12
   1   0  22-73.6544 144.907  22
  -1   0 -22-94.2785 141.053  28
   1   0  23 81.2078 145.662  22
  -1   0 -23 78.4901 128.061  28
   1   0  23-0.31958 164.406  12
   1   0  24-75.2293 106.542  10
  -1   0 -24-119.390 124.496  28
   1   0  24-36.6113 137.991  12
   1   0  24-37.0609 123.820  22
   1   0  25-130.388 116.205  12
  -1   0 -25 127.540 102.794  28
   1   0  26-131.781 98.4145  12
  -1  -1  25 3375.48 256.539  12
  -1  -1  24 850.968 182.607  12
  -1  -1  24 755.411 147.061  10
   1   1 -23 2374.45 259.638  28
  -1  -1  23 2522.76 256.473  10
  -1  -1  23 2045.22 257.420  12
  -1  -1  22-283.097 182.268  12
  -1  -1  22-2.70144 139.482  10
   1   1 -22 73.4934 134.927  28
  -1  -1  21 171.056 189.710  12
   1   1 -21 265.636 148.984  28
  -1  -1  21-115.574 142.693  22
  -1  -1  21 182.332 146.650  10
  -1  -1  20-179.588 191.732  12
  -1  -1  20 380.595 170.142  22
   1   1 -20 133.844 181.742  28
  -1  -1  19 1201.76 255.371  12
   1   1 -19 983.145 229.359  28
  -1  -1  19 1156.59 239.237  22
  -1  -1  18 772.833 218.655  12
  -1  -1  18 434.066 155.235  22
   1   1 -17 404.980 195.722   5
   1   1 -17 390.999 163.967  28
  -1  -1  17 217.787 144.320  22
  -1  -1  17 122.234 181.676  12
  -1  -1  17 373.552 270.070  33
  -1  -1  16 1601.21 387.991  30
  -1  -1  16 1636.88 238.896  22
   1   1 -16 1596.97 323.599   5
  -1  -1  16 1449.07 381.341  33
   1   1 -16 1648.50 243.493  28
  -1  -1  16 1314.35 225.656  12
  -1  -1  15 17.7198 213.527  33
   1   1 -15-170.707 143.315   5
   1   1 -15-325.712 208.867  32
  -1  -1  15 64.2780 220.913  30
  -1  -1  15-48.7225 201.598  31
  -1  -1  14 2345.94 423.963  31
   1   1 -14 3319.69 384.948   5
   1   1 -14 3038.86 387.776  32
  -1  -1  14 2928.39 456.772  30
   1   1 -13 5921.42 485.385  32
  -1  -1  13 6242.27 642.962  30
  -1  -1  13 5548.65 574.995  31
   1   1 -13 5946.22 491.780   5
   1   1 -12 4016.49 399.420   5
  -1  -1  12 4447.70 530.426  30
   1   1 -12 4037.77 391.653  32
  -1  -1  12 3914.37 462.871  31
   1   1 -12 3857.43 365.147  34
  -1  -1  11 53.9646 174.119  30
   1   1 -11 314.691 163.082   5
   1   1 -11 131.144 127.507  34
   1   1 -11 201.777 127.194  32
   1   1 -11 281.674 108.171   1
  -1  -1  11 46.5078 147.407  31
   1   1 -10 466.798 145.120  34
   1   1 -10 531.158 109.793   1
  -1  -1  10 564.631 235.489  30
   1   1 -10 635.431 158.744  32
  -1  -1  10 582.285 208.821  31
   1   1 -10 618.575 170.141   5
   1   1  -9 12250.1 577.603  34
   1   1  -9 12150.4 570.023   5
  -1  -1   9 12764.4 667.103  31
  -1  -1   9 11763.7 524.731  35
   1   1  -9 11921.1 560.999  32
  -1  -1   9 11949.6 717.820  30
   1   1  -9 12051.3 435.841   1
  -1  -1   8-44.6631 199.581  30
   1   1  -8-90.5962 112.343  32
  -1  -1   8 138.126 163.681  31
   1   1  -8-7.88678 75.2400   1
   1   1  -8-172.149 122.356  34
  -1  -1   8 192.667 113.389  35
   1   1  -8-31.3333 117.907   5
   1   1  -7 11521.8 403.121   1
  -1  -1   7 11780.4 630.012  30
  -1  -1   7 11797.7 581.659  31
   1   1  -7 11660.4 496.396   5
   1   1  -7 12285.9 499.631  32
   1   1  -7 12085.4 518.471  34
  -1  -1   7 12282.3 499.696  35
   1   1  -6 1996.22 212.894  34
  -1  -1   6 2158.23 173.287   3
  -1  -1   6 2218.12 212.755  35
   1   1  -6 2174.63 202.168  32
   1   1  -6 2127.28 166.613   1
  -1  -1   6 2095.72 242.577  31
   1   1  -5 8376.34 312.665   1
  -1  -1   5 8551.31 321.258   3
   1   1  -5 8537.68 380.856  34
   1   1  -5 9137.52 377.313  32
  -1  -1   5 8280.81 377.779  35
  -1  -1   5 7795.32 421.044  31
   1   1  -5 8513.06 374.192   4
   1   1  -4 372.723 126.377   4
  -1  -1   4 363.022 153.479  31
   1   1  -4 431.385 118.186  32
   1   1  -4 339.634 104.955   1
   1   1  -4 280.294 102.885  34
  -1  -1   4 463.979 102.152   3
  -1  -1   4 323.381 133.127  35
  -1  -1   3 601.999 119.552  31
  -1  -1   3 945.671 154.291  35
   1   1  -3 711.928 107.158  34
   1   1  -3 685.254 111.490   4
  -1  -1   3 632.963 89.7982   3
   1   1  -3 878.416 116.714  32
  -1  -1   2 3253.97 189.007  35
  -1  -1   2 3105.62 148.832   3
  -1  -1   2 3354.84 188.617  31
   1   1  -2 3546.94 158.981  34
   1   1  -2 3543.28 174.128  32
   1   1  -2 3299.87 144.133   2
   1   1  -1-3.89448 29.3131   2
  -1  -1   1 19.0782 45.9907   3
   1   1  -1-19.6655 50.3177  32
  -1  -1   1 26.9791 43.7281  31
  -1  -1   0 67.9385 28.6222  31
  -1  -1   0 98.9400 42.0871   3
   1   1   0 44.1286 47.1995  32
   1   1   0 81.3391 42.8639  30
   1   1   1 498.691 69.5286  30
  -1  -1  -1 439.874 53.0394   1
   1   1   1 564.613 55.3700  33
  -1  -1  -2 7.16362 38.0803   1
  -1  -1  -2 16.2597 41.0717   5
   1   1   2-29.2292 59.9010  30
   1   1   2 83.6882 44.6475  33
   1   1   3 195.703 66.4458  33
  -1  -1  -3 304.750 57.9507   1
  -1  -1  -3 214.657 60.1392   5
   1   1   3 376.967 109.578  30
  -1  -1  -3 231.745 57.3186   7
  -1  -1  -4 2816.21 161.036   7
   1   1   4 2911.87 179.418  31
   1   1   4 2879.58 148.891  35
   1   1   4 2868.14 190.954  33
   1   1   4 2982.10 244.945  30
  -1  -1  -4 2883.43 170.337   5
  -1  -1  -4 3057.06 157.782   1
   1   1   5 970.739 175.584  33
   1   1   5 1060.97 205.411  30
  -1  -1  -5 1040.68 128.696   1
  -1  -1  -5 941.048 133.477   5
   1   1   5 918.909 116.078  35
   1   1   5 965.705 142.464  31
  -1  -1  -5 939.781 188.115  34
  -1  -1  -6 19133.5 549.434   5
   1   1   6 18114.7 586.517  31
  -1  -1  -6 17161.4 661.391  34
  -1  -1  -6 17391.8 489.883   1
   1   1   6 18736.4 500.427  35
   1   1   6 18646.9 719.381  30
   1   1   6 17840.4 433.181   8
   1   1   7 114.409 156.010  30
  -1  -1  -7 76.8906 93.3979   5
  -1  -1  -7 315.525 99.3681   1
   1   1   7 138.749 96.0055  31
  -1  -1  -7 86.3607 138.964  34
   1   1   7 167.040 70.3890   6
   1   1   7 55.0788 67.2581   8
   1   1   7 176.163 84.4693  35
  -1  -1  -8 2561.10 228.327   1
   1   1   8 2291.92 309.141  30
   1   1   8 2112.08 243.604  31
   1   1   8 1992.30 177.354  35
   1   1   8 2155.27 156.341   6
  -1  -1  -8 2371.17 278.812  34
  -1  -1  -8 2004.89 202.259   5
   1   1   8 2162.54 152.271   8
   1   1   9 272.657 180.986  30
   1   1   9 361.334 159.540  31
  -1  -1  -9 481.997 183.509  34
  -1  -1  -9 327.256 109.182   1
  -1  -1  -9 255.774 130.267   5
   1   1   9 240.920 82.3777   8
   1   1   9 182.811 109.565  35
   1   1  10 19001.2 550.660   8
   1   1  10 19479.2 866.306  33
   1   1  10 19596.0 977.125  30
   1   1  10 18836.4 625.059  35
  -1  -1 -10 20442.1 657.463   1
  -1  -1 -10 20015.3 889.562  34
  -1  -1 -10 19358.1 730.382   5
   1   1  10 18795.8 794.528  31
  -1  -1 -11 285.849 155.325  34
   1   1  11 552.621 232.284  33
  -1  -1 -11 615.741 143.341   1
   1   1  11 795.385 204.159  31
   1   1  11 481.678 223.635  30
  -1  -1 -11 501.065 155.966   5
  -1  -1 -12 1692.03 304.201  34
   1   1  12 1525.86 285.817  31
  -1  -1 -12 1483.48 246.841   5
   1   1  12 1443.58 312.120  30
   1   1  12 1505.10 303.281  33
  -1  -1 -12 1487.94 200.868   1
  -1  -1 -13 208.112 156.486   5
   1   1  13-63.6107 184.179  33
  -1  -1 -13 181.430 116.620   1
  -1  -1 -13 141.843 179.714  34
   1   1  13 298.220 247.365  30
  -1  -1 -14 658.137 172.182   1
   1   1  14 882.816 299.776  30
  -1  -1 -14 437.388 188.705   5
   1   1  14 261.021 181.207  33
  -1  -1 -14 411.764 239.380  34
   1   1  15 736.581 281.295  33
  -1  -1 -15 532.458 247.056   5
   1   1  15 380.186 227.517  30
  -1  -1 -15 81.6555 156.068  34
  -1  -1 -16 8565.24 639.509   5
   1   1  16 8601.28 781.074  33
   1   1  16 7903.62 803.933  30
   1   1  17 2283.54 442.234  30
   1   1  17 2708.95 497.924  33
  -1  -1 -17 1911.22 349.814   5
   1   1  17 2583.69 311.067  12
  -1  -1 -17 2128.11 263.374  28
   1   1  18 1885.00 436.262  33
   1   1  18 2181.10 300.702  12
  -1  -1 -18 1984.89 255.421  28
  -1  -1 -18 1723.25 315.795   5
   1   1  18 1732.91 239.729  22
   1   1  18 1214.12 371.293  30
   1   1  19 5052.29 389.923  22
  -1  -1 -19 5322.69 421.121  28
   1   1  19 5477.45 448.920  12
   1   1  20 2716.41 344.658  12
  -1  -1 -20 2716.20 321.417  28
   1   1  20 2590.79 283.534  22
   1   1  21 265.719 176.724  12
   1   1  21 166.380 162.340  22
  -1  -1 -21 154.751 139.168  28
   1   1  22 106.057 140.453  22
  -1  -1 -22 230.323 170.601  28
   1   1  22 176.797 180.631  12
   1   1  23 243.134 157.396  22
  -1  -1 -23 668.058 184.022  28
   1   1  23 374.215 168.968  12
  -1  -1 -24 366.223 152.497  28
   1   1  24 352.371 120.093  22
   1   1  24 314.909 160.812  12
   1   1  25 137.074 144.985  12
  -1  -1 -25 28.9120 95.9660  28
   1   1  25 66.2516 109.852  10
   1   1  26 675.467 152.471  12
  -1  -2  25 698.201 128.207  12
  -1  -2  24 367.722 140.216  12
  -1  -2  23 288.612 146.406  12
   1   2 -23 208.275 125.912  28
   1   2 -22-69.3851 126.084  28
  -1  -2  22 1.85451 115.770  10
  -1  -2  22-42.7673 154.743  12
  -1  -2  21 2297.95 273.471  22
   1   2 -21 2250.42 294.683  28
  -1  -2  21 2340.02 271.949  10
  -1  -2  21 2754.95 333.045  12
  -1  -2  20 5247.84 453.911  12
   1   2 -20 4792.35 414.451  28
  -1  -2  20 4765.62 379.948  22
  -1  -2  20 6110.63 440.656  10
   1   2 -19 2472.04 329.781  28
  -1  -2  19 2303.62 319.351  12
  -1  -2  19 2297.60 287.347  22
  -1  -2  18 1667.76 285.579  12
   1   2 -18 1550.83 255.466  28
  -1  -2  18 1302.11 239.414  22
  -1  -2  17 3052.35 316.540  22
  -1  -2  17 3338.81 379.358  12
   1   2 -17 2763.78 314.966  28
   1   2 -17 3019.97 407.448   5
   1   2 -16 1107.37 263.854   5
  -1  -2  16 1329.79 416.958  33
  -1  -2  16 1222.12 238.208  12
   1   2 -16 1141.91 276.602  32
  -1  -2  16 1374.53 224.945  22
   1   2 -16 1166.62 227.050  28
   1   2 -15 13.4024 141.112  32
  -1  -2  15 150.887 208.952  33
   1   2 -15 22.0582 172.124   5
  -1  -2  14 1068.84 336.956  33
   1   2 -14 1374.51 277.701   5
  -1  -2  14 964.307 302.355  31
  -1  -2  14 1520.63 348.559  30
   1   2 -14 1061.26 235.325  32
   1   2 -13 716.815 206.349  32
  -1  -2  13 437.113 202.366  31
  -1  -2  13 281.537 183.206  30
   1   2 -13 657.078 192.667   5
   1   2 -12 1017.98 221.987   5
  -1  -2  12 1060.22 277.526  31
   1   2 -12 921.241 208.585  32
   1   2 -12 983.752 159.620   1
  -1  -2  12 834.931 265.907  30
   1   2 -11 330.662 148.141  32
  -1  -2  11 95.2037 151.188  31
  -1  -2  11 24.9141 183.912  30
   1   2 -11 278.916 132.590   5
   1   2 -11 614.295 136.978   1
  -1  -2  10 10009.1 563.137  35
  -1  -2  10 9478.89 646.500  30
   1   2 -10 9754.05 534.867   5
   1   2 -10 9501.43 474.629  34
  -1  -2  10 9098.71 639.526  31
   1   2 -10 8749.71 531.471  32
   1   2 -10 10495.0 462.105   1
  -1  -2   9 2895.14 362.079  30
  -1  -2   9 3036.84 361.280  31
   1   2  -9 2779.32 286.655  32
   1   2  -9 2717.02 254.985  34
  -1  -2   9 3012.48 299.313  35
   1   2  -9 3011.10 287.063   5
   1   2  -9 3131.07 246.898   1
   1   2  -8 989.149 156.050  34
   1   2  -8 1170.72 202.301   5
  -1  -2   8 1412.76 219.436  35
  -1  -2   8 1500.18 266.764  31
  -1  -2   8 1305.15 234.899  30
   1   2  -8 1187.92 166.549   1
   1   2  -8 1265.76 197.628  32
   1   2  -7 13026.6 537.879   5
   1   2  -7 13554.0 490.332   1
  -1  -2   7 13834.9 651.888  30
   1   2  -7 13375.4 551.707  32
  -1  -2   7 13645.0 602.700  35
  -1  -2   7 14043.0 505.187   3
  -1  -2   7 13952.1 641.310  31
   1   2  -7 12702.0 478.895  34
   1   2  -6 13158.8 458.955  34
  -1  -2   6 13900.4 608.661  31
  -1  -2   6 14225.9 624.050  30
   1   2  -6 14156.6 539.406  32
   1   2  -6 14412.6 492.374   1
  -1  -2   6 13865.5 486.681   3
  -1  -2   6 14325.6 591.238  35
  -1  -2   5 25496.7 811.918  35
   1   2  -5 26975.9 700.118   4
  -1  -2   5 25524.8 800.567  31
   1   2  -5 27455.4 748.180  32
  -1  -2   5 26803.6 679.999   3
   1   2  -5 27195.5 693.136   1
   1   2  -5 25259.8 641.233  34
   1   2  -4 22379.8 632.752  32
  -1  -2   4 22248.6 588.069   3
  -1  -2   4 21922.8 676.095  31
   1   2  -4 21459.4 521.271  34
   1   2  -4 22803.2 587.739   4
  -1  -2   4 21712.2 707.734  35
  -1  -2   3 30483.7 766.034  31
   1   2  -3 30872.8 683.199   4
   1   2  -3 31057.4 737.735  32
  -1  -2   3 29711.5 696.470   3
   1   2  -3 29451.9 606.415  34
  -1  -2   3 29899.9 833.903  35
  -1  -2   2 1217.54 186.705  35
  -1  -2   2 1095.07 125.141   3
  -1  -2   2 1135.77 130.960  31
   1   2  -2 1405.38 149.832  32
  -1  -2   1 60494.2 1084.53  31
  -1  -2   1 60196.1 1093.60   3
   1   2  -1 60542.8 1161.74  32
  -1  -2   0 2833.37 115.662  31
   1   2   0 2744.37 124.683  30
   1   2   0 2507.09 167.388  32
  -1  -2   0 2554.33 140.990   3
  -1  -2  -1 6159.66 211.649   3
   1   2   1 6072.21 221.589  30
  -1  -2  -2 58563.3 1055.16   5
  -1  -2  -2 60497.5 1087.59   1
   1   2   2 59225.7 957.041  33
   1   2   2 58083.1 1128.58  30
  -1  -2  -3 3927.25 185.714   5
   1   2   3 3959.43 163.920  33
   1   2   3 4055.56 248.150  30
  -1  -2  -3 4138.17 192.674   1
   1   2   3 4312.49 141.397  31
   1   2   4 2669.56 238.567  30
  -1  -2  -4 2328.00 181.149   7
   1   2   4 2664.70 175.152  33
  -1  -2  -4 2691.23 166.131   1
   1   2   4 2548.34 145.307  31
  -1  -2  -4 2588.89 174.231   5
  -1  -2  -5 137.328 113.220   5
   1   2   5 191.960 168.319  30
  -1  -2  -5 243.243 109.960   1
  -1  -2  -5 143.617 94.8942   7
   1   2   5 153.243 96.0000  31
  -1  -2  -6 763.084 132.549   1
   1   2   6 687.311 191.741  30
   1   2   6 415.127 81.1153  35
  -1  -2  -6 566.363 128.201   5
  -1  -2  -6 759.329 203.039  34
   1   2   6 477.119 126.104  31
  -1  -2  -6 682.918 130.046   7
  -1  -2  -7 24817.0 890.224  34
   1   2   7 25591.4 941.058  30
   1   2   7 25833.2 592.943  35
  -1  -2  -7 25348.8 646.956   1
   1   2   7 26209.4 729.700  31
   1   2   7 24552.6 600.751   8
  -1  -2  -7 25845.3 725.828   5
   1   2   8 10348.9 374.264   8
  -1  -2  -8 11164.7 621.794  34
   1   2   8 11395.3 493.956  31
  -1  -2  -8 10600.1 416.399   1
  -1  -2  -8 10876.9 479.691   5
   1   2   8 11655.9 660.646  30
  -1  -2  -9 18561.9 840.444  34
  -1  -2  -9 18684.0 681.426   5
   1   2   9 19427.2 533.259  35
   1   2   9 18095.4 538.549   8
   1   2   9 19152.4 909.987  30
  -1  -2  -9 18850.6 614.843   1
   1   2   9 19181.6 710.001  31
  -1  -2 -10 6860.80 547.571  34
   1   2  10 7017.95 330.202   8
   1   2  10 6672.34 466.811  31
   1   2  10 7646.37 617.995  30
  -1  -2 -10 6978.10 438.287   5
  -1  -2 -10 8221.18 414.835   1
   1   2  10 6554.21 305.927  35
   1   2  10 7675.91 515.125  33
  -1  -2 -11 6626.78 548.916  34
  -1  -2 -11 7054.30 389.301   1
   1   2  11 6371.37 466.874  31
   1   2  11 6819.54 340.175   8
  -1  -2 -11 6254.51 436.864   5
   1   2  11 7028.69 620.924  30
   1   2  11 6581.44 525.131  33
   1   2  12 7428.05 582.504  33
   1   2  12 7533.82 374.290   8
  -1  -2 -12 7312.03 594.810  34
   1   2  12 7852.44 692.017  30
   1   2  12 7356.17 541.295  31
  -1  -2 -12 7395.91 417.414   1
  -1  -2 -12 7326.54 493.302   5
   1   2  13 5646.19 520.031  31
   1   2  13 6282.23 639.352  30
  -1  -2 -13 5715.94 555.347  34
   1   2  13 6351.31 566.108  33
  -1  -2 -13 5794.35 459.657   5
  -1  -2 -13 6362.27 400.860   1
  -1  -2 -14 3321.76 307.637   1
  -1  -2 -14 3373.32 397.417   5
   1   2  14 3080.88 501.312  30
  -1  -2 -14 3836.33 474.846  34
   1   2  14 3843.97 462.331  33
  -1  -2 -15 2536.66 342.049   5
   1   2  15 2740.86 424.185  33
   1   2  15 2800.31 492.008  30
  -1  -2 -15 2528.10 369.288  34
  -1  -2 -16 4307.24 539.950  34
   1   2  16 4394.15 573.762  33
  -1  -2 -16 5141.13 491.736   5
   1   2  16 4694.51 634.332  30
   1   2  17 2071.00 281.934  12
  -1  -2 -17 2443.97 380.285   5
   1   2  17 2027.77 411.975  33
   1   2  17 2498.31 541.303  30
  -1  -2 -17 2468.41 401.764  34
  -1  -2 -18 5220.81 395.671  28
  -1  -2 -18 4714.92 528.608   5
   1   2  18 4617.74 672.558  30
   1   2  18 5919.76 449.860  12
   1   2  18 4653.52 362.040  22
   1   2  18 4760.99 605.810  33
  -1  -2 -19 3664.82 357.310  28
   1   2  19 3574.62 371.021  12
   1   2  19 2987.46 308.021  22
   1   2  20 546.542 219.378  12
  -1  -2 -20 720.372 197.839  28
   1   2  20 720.007 190.353  22
  -1  -2 -21-47.9078 146.748  28
   1   2  21 78.1343 135.404  22
   1   2  22 879.238 180.942  22
  -1  -2 -22 999.979 199.411  28
   1   2  22 1024.76 237.153  12
  -1  -2 -23 465.884 156.984  28
   1   2  23 705.188 213.018  12
   1   2  24 855.883 213.002  12
  -1  -2 -24 738.309 173.827  28
  -1  -2 -25 302.719 129.660  28
   1   2  25 513.180 174.896  12
   1   2  26 286.283 104.060  10
   1   2  26 231.804 140.443  12
   1   2  27 41.4266 86.2277  12
  -1  -3  24 363.437 118.373  12
  -1  -3  23 1188.25 193.595  12
   1   3 -23 1012.90 181.743  28
  -1  -3  22 933.767 207.540  12
   1   3 -22 845.086 200.798  28
  -1  -3  21 1849.03 268.886  12
   1   3 -21 1781.42 257.153  28
  -1  -3  20 4210.45 353.631  10
  -1  -3  20 2790.51 306.863  22
   1   3 -20 3475.63 358.387  28
  -1  -3  20 3567.32 369.841  12
  -1  -3  19 2028.38 304.720  12
   1   3 -19 2370.67 313.518  28
  -1  -3  19 2478.25 291.642  10
  -1  -3  19 2278.59 303.336  22
  -1  -3  18 1705.99 261.296  10
  -1  -3  18 842.740 221.558  22
   1   3 -18 1378.43 255.467  28
  -1  -3  18 1323.66 275.924  12
   1   3 -17 3539.51 357.722  28
  -1  -3  17 3579.98 386.388  12
  -1  -3  17 3397.81 334.412  22
  -1  -3  16 567.599 218.499  12
  -1  -3  16 339.998 175.760  22
   1   3 -16 682.484 250.805   5
  -1  -3  16 506.062 328.349  33
   1   3 -16 194.716 186.041  32
   1   3 -16 307.913 156.006  28
  -1  -3  15 13441.9 1068.57  33
   1   3 -15 14524.2 794.308   5
   1   3 -15 13920.5 636.590  28
   1   3 -15 11670.9 759.593  32
  -1  -3  15 11260.4 570.514  22
  -1  -3  15 12948.0 643.026  12
   1   3 -14 4178.40 458.970  32
  -1  -3  14 4769.55 613.069  33
   1   3 -14 4344.81 434.219   5
  -1  -3  13 2022.72 389.578  33
   1   3 -13 1845.89 294.376  32
   1   3 -13 1889.08 273.464   5
   1   3 -12 7574.21 521.038   5
  -1  -3  12 7692.75 674.227  31
   1   3 -12 7213.27 526.267  32
  -1  -3  12 7895.07 653.543  30
   1   3 -12 7217.58 429.583   1
  -1  -3  11 2058.64 282.188  35
   1   3 -11 2447.76 292.637   5
  -1  -3  11 2334.62 337.617  30
  -1  -3  11 2350.97 366.374  31
   1   3 -11 2496.74 311.338  32
   1   3 -11 2503.60 255.940   1
   1   3 -10 470.609 114.584   1
   1   3 -10 610.661 163.712  32
   1   3 -10 357.711 151.153   5
  -1  -3  10 400.885 170.082  35
  -1  -3  10 355.579 159.389  30
  -1  -3  10 370.402 165.619  31
  -1  -3   9 8270.06 589.707  31
   1   3  -9 7858.15 485.207  32
  -1  -3   9 8482.78 572.728  30
   1   3  -9 8959.05 484.644   5
  -1  -3   9 8489.13 551.740  35
   1   3  -9 8800.76 446.690   1
  -1  -3   8 13614.2 674.965  30
  -1  -3   8 12657.3 666.151  35
   1   3  -8 13922.8 581.303   5
   1   3  -8 13614.5 548.996   1
  -1  -3   8 13028.1 692.291  31
   1   3  -8 12435.6 577.156  32
   1   3  -7 18.8192 118.845  32
  -1  -3   7-110.736 135.613  30
  -1  -3   7 56.8312 128.100  31
   1   3  -7-94.3266 111.672   1
   1   3  -7 215.304 71.8077  34
  -1  -3   7 62.8762 105.490   3
  -1  -3   7 155.566 152.963  35
   1   3  -6 1135.08 175.661  32
   1   3  -6 1124.40 165.548   1
   1   3  -6 1089.72 101.976  34
  -1  -3   6 821.546 202.901  35
  -1  -3   6 1130.52 207.171  31
  -1  -3   6 979.900 171.513  30
  -1  -3   6 1011.37 155.640   3
   1   3  -5 12620.5 497.716   1
   1   3  -5 13618.3 451.311   4
  -1  -3   5 12518.7 553.488  31
  -1  -3   5 12420.9 602.869  35
  -1  -3   5 12449.7 511.363  30
   1   3  -5 13304.4 509.265  32
  -1  -3   5 13271.3 486.093   3
  -1  -3   4 2504.62 273.029  35
  -1  -3   4 2600.02 207.996   3
   1   3  -4 2644.23 177.533   4
   1   3  -4 2591.86 219.961  32
  -1  -3   4 2491.12 234.554  31
  -1  -3   3 1139.63 156.978   3
   1   3  -3 1127.15 123.991   4
  -1  -3   3 1310.87 178.096  31
  -1  -3   3 1134.65 207.889  35
   1   3  -3 1201.13 164.622  32
   1   3  -2 1937.51 191.816  32
  -1  -3   2 1865.64 173.827  31
  -1  -3   2 1596.13 160.839   3
  -1  -3   1 83.9181 100.802   3
   1   3  -1 5.68672 109.911  32
  -1  -3   1 85.7571 91.4967  31
  -1  -3   0 1392.01 104.688  31
   1   3   0 1220.51 90.2245  30
  -1  -3   0 1286.96 121.054  34
  -1  -3   0 1185.00 127.302   3
   1   3   0 1382.77 170.728  32
  -1  -3  -1 48341.5 932.229   3
  -1  -3  -1 47400.6 970.792  34
   1   3   1 47968.8 912.500  30
  -1  -3  -2 13551.6 395.348   5
  -1  -3  -2 15095.6 397.690   3
   1   3   2 14397.6 436.334  30
  -1  -3  -2 14148.1 472.664  34
  -1  -3  -3 6872.36 279.924   5
   1   3   3 6918.75 340.721  30
  -1  -3  -3 7314.47 255.903   3
  -1  -3  -3 6409.16 351.962  34
   1   3   3 6888.74 153.298  31
   1   3   3 6521.49 173.416  33
   1   3   4 133.243 81.0144  33
  -1  -3  -4 170.439 115.084   5
   1   3   4 127.697 163.497  30
  -1  -3  -4 339.556 135.510   1
   1   3   4 108.009 62.2820  31
   1   3   5 3350.51 203.255  33
   1   3   5 3261.54 172.058  31
  -1  -3  -5 3704.34 264.431   7
   1   3   5 3141.17 291.314  30
  -1  -3  -5 3635.34 213.918   1
  -1  -3  -5 3235.79 229.614   5
   1   3   6 259.913 78.7855  31
  -1  -3  -6 270.521 113.662   7
   1   3   6 284.853 96.8792  36
  -1  -3  -6 320.085 110.049   5
   1   3   6 211.537 154.653  30
  -1  -3  -6 209.818 94.8928   1
  -1  -3  -7 2230.10 291.248  34
  -1  -3  -7 2124.03 229.949   7
   1   3   7 2056.28 187.916  31
   1   3   7 2033.06 129.218  35
  -1  -3  -7 2222.68 183.495   1
   1   3   7 1787.73 286.977  30
  -1  -3  -7 2140.02 216.148   5
   1   3   8 5176.70 314.506  31
  -1  -3  -8 5449.44 295.916   1
  -1  -3  -8 5392.98 340.717   5
   1   3   8 5521.12 462.177  30
   1   3   8 4895.76 210.558  35
  -1  -3  -8 5269.26 449.536  34
  -1  -3  -9 1582.95 223.660   5
  -1  -3  -9 1416.24 171.224   1
   1   3   9 1649.25 205.425  31
   1   3   9 1330.33 272.682  30
   1   3   9 1481.69 164.823   8
  -1  -3  -9 1245.57 250.668  34
   1   3   9 1577.56 129.247  35
   1   3  10 1717.68 332.846  30
   1   3  10 1641.05 183.382   8
  -1  -3 -10 1502.54 190.486   1
  -1  -3 -10 1548.22 238.294   5
   1   3  10 1626.11 228.746  31
   1   3  10 1611.11 249.079  33
  -1  -3 -10 1683.55 306.661  34
   1   3  11 16261.6 943.483  30
   1   3  11 15506.9 554.810   8
  -1  -3 -11 17132.3 636.791   1
   1   3  11 16048.9 718.222  31
   1   3  11 16072.0 767.421  33
  -1  -3 -11 15920.6 710.556   5
  -1  -3 -11 15008.3 878.419  34
  -1  -3 -12 282.123 175.871   5
  -1  -3 -12 247.666 188.156  34
   1   3  12-5.74239 199.768  30
   1   3  12 348.224 179.124  33
   1   3  12 226.305 142.672  31
   1   3  12 316.319 113.943   8
  -1  -3 -12 130.191 95.5663   1
  -1  -3 -13 112.977 136.769   5
   1   3  13 18.0015 163.409  33
  -1  -3 -13 133.380 172.754  34
  -1  -3 -13-210.092 117.637   1
   1   3  13 160.415 100.442   8
   1   3  13 175.498 165.896  31
   1   3  13 191.258 193.501  30
   1   3  14-204.621 269.624  30
  -1  -3 -14 152.478 206.373  34
  -1  -3 -14 209.906 160.951   5
   1   3  14 83.6004 165.142  31
   1   3  14-199.814 124.415   8
   1   3  14 273.308 197.489  33
  -1  -3 -15 424.382 198.496   5
   1   3  15 274.889 161.904  33
  -1  -3 -15 512.008 260.948  34
   1   3  15 829.487 352.302  30
   1   3  16 388.396 264.860  33
   1   3  16 79.7193 255.116  30
  -1  -3 -16 432.428 202.604  34
  -1  -3 -16 93.5455 161.076   5
   1   3  17 1688.71 377.258  33
  -1  -3 -17 1684.97 304.846   5
  -1  -3 -17 1998.83 416.973  34
   1   3  17 2219.91 283.846  12
   1   3  17 1771.56 487.202  30
   1   3  18 1799.39 395.141  33
  -1  -3 -18 1751.42 369.931  34
  -1  -3 -18 2153.90 354.638   5
   1   3  18 1219.37 352.501  30
   1   3  18 2290.04 300.158  12
  -1  -3 -18 2405.79 278.849  28
   1   3  19 361.272 193.177  12
   1   3  19 717.123 296.013  33
  -1  -3 -19 217.603 124.191  28
  -1  -3 -20 230.106 134.459  28
   1   3  20 310.019 184.873  12
  -1  -3 -21 484.764 160.758  28
   1   3  21 330.262 196.119  12
  -1  -3 -22 868.509 213.505  28
   1   3  22 727.751 231.208  12
  -1  -3 -23 111.961 120.927  28
   1   3  23-193.246 158.703  12
  -1  -3 -24 271.286 134.461  28
   1   3  24 92.5518 159.063  12
   1   3  25 405.910 157.711  12
   1   3  26 1416.62 198.945  12
   1   3  26 1467.24 193.282  10
   1   3  27-234.449 109.802  12
   1   3  27-10.7103 71.3253  10
  -1  -4  24-11.7132 83.9043  12
  -1  -4  23-181.830 103.734  20
  -1  -4  23 410.704 128.562  12
   1   4 -22 227.097 126.198  28
  -1  -4  22 427.702 153.928  12
  -1  -4  21 267.991 161.575  12
   1   4 -21 262.064 140.721  28
  -1  -4  20 275.808 174.490  12
   1   4 -20 39.7397 142.790  28
  -1  -4  19-90.5048 179.722  12
   1   4 -19 92.3463 156.852  28
  -1  -4  19 128.149 171.257  22
   1   4 -18 189.426 157.353  28
  -1  -4  18 113.741 177.792  22
  -1  -4  18-21.8937 160.384  12
  -1  -4  17-132.880 166.775  22
  -1  -4  17 82.6834 155.492  12
   1   4 -17-141.526 177.050  28
  -1  -4  16 207.951 193.271  22
   1   4 -16 117.241 157.043  28
  -1  -4  16-115.142 163.881  12
   1   4 -15 6774.55 459.463  28
  -1  -4  15 5988.16 444.575  12
   1   4 -15 5973.17 561.506  32
  -1  -4  15 7213.64 789.335  33
  -1  -4  15 6217.57 434.500  22
   1   4 -14 623.282 217.294   5
  -1  -4  14 928.846 343.193  33
   1   4 -14 719.929 215.615  32
   1   4 -14 500.662 186.749  28
   1   4 -13 2850.53 359.746   5
   1   4 -13 2166.61 349.177  32
   1   4 -13 2426.90 281.141   1
  -1  -4  13 3065.95 466.952  33
   1   4 -12 1391.95 246.424   5
   1   4 -12 1231.99 255.006  32
   1   4 -12 1664.21 237.456   1
  -1  -4  12 1400.01 310.295  33
   1   4 -11 8645.19 557.214  32
   1   4 -11 9034.20 545.862   5
  -1  -4  11 8764.45 718.659  33
  -1  -4  11 9790.03 682.462  35
   1   4 -11 9533.28 520.199   1
  -1  -4  10 3797.47 442.919  31
   1   4 -10 4598.79 399.883  32
   1   4 -10 4536.29 350.823   1
   1   4 -10 4237.80 355.430   5
  -1  -4  10 4420.80 464.099  35
   1   4  -9 3260.21 299.204   5
  -1  -4   9 2939.48 373.621  35
  -1  -4   9 3031.45 392.047  31
   1   4  -9 3212.69 301.169   1
  -1  -4   9 3066.38 340.579  30
   1   4  -9 3108.74 315.937  32
   1   4  -8 1241.12 194.622   5
  -1  -4   8 1301.57 268.546  31
   1   4  -8 1277.46 198.275   1
  -1  -4   8 1282.92 206.205   3
  -1  -4   8 1115.36 197.705  30
  -1  -4   8 1478.89 283.553  35
   1   4  -8 1152.37 213.214  32
  -1  -4   7 3240.46 287.847   3
   1   4  -7 3250.19 301.934  32
  -1  -4   7 2955.63 277.429  30
  -1  -4   7 2713.18 322.489  31
   1   4  -7 3308.79 298.048   1
  -1  -4   7 3734.87 408.492  35
  -1  -4   6 5447.04 340.781  30
  -1  -4   6 5003.61 421.470  35
   1   4  -6 5305.68 348.968  32
  -1  -4   6 4655.70 330.509   3
   1   4  -6 5124.90 345.731   1
  -1  -4   6 4620.86 393.747  31
   1   4  -5 13013.5 551.410   1
  -1  -4   5 13555.0 591.907  31
   1   4  -5 13929.0 555.221  32
  -1  -4   5 13615.6 529.414   3
   1   4  -5 13842.0 455.675   4
  -1  -4   5 13515.3 499.802  30
  -1  -4   5 13354.7 686.623  35
  -1  -4   4 12130.8 421.237  30
  -1  -4   4 12326.7 490.082   3
   1   4  -4 12727.4 511.798  32
  -1  -4   4 12519.8 530.587  31
  -1  -4   4 12245.0 626.064  35
   1   4  -4 13676.8 417.400   4
  -1  -4   3 414.740 197.285  35
  -1  -4   3 457.378 122.420   3
   1   4  -3 397.681 128.366  32
   1   4  -3 395.387 81.2423   4
  -1  -4   3 359.475 116.004  31
   1   4  -2 12869.6 510.825  32
  -1  -4   2 11771.8 452.887   3
  -1  -4   2 12756.2 450.024  31
  -1  -4   2 12656.9 593.899  35
  -1  -4   1 8601.71 358.916   3
  -1  -4   1 8159.17 247.296  34
   1   4  -1 8501.32 404.687  32
  -1  -4   0 1699.51 137.050  34
  -1  -4   0 1261.47 146.704   3
  -1  -4   0 1664.83 221.602   6
   1   4   0 1552.24 200.435  32
  -1  -4  -1 20985.1 400.375  33
  -1  -4  -1 21189.4 574.577   3
  -1  -4  -1 20252.9 578.112  34
   1   4   1 20109.8 489.303  30
  -1  -4  -2 79869.1 1298.93   3
   1   4   2 79218.7 1328.47  30
  -1  -4  -2 79738.0 1430.57  34
  -1  -4  -3 732.641 145.542   5
   1   4   3 391.064 147.024  30
  -1  -4  -3 537.631 98.2472   3
  -1  -4  -3 500.745 152.579  34
   1   4   4 55303.6 1279.23  30
   1   4   4 52547.3 888.158  33
  -1  -4  -4 56297.1 1061.93   3
   1   4   4 55145.4 902.515  31
  -1  -4  -4 55283.2 1139.79   5
  -1  -4  -4 53242.1 1320.09  34
   1   4   5 8333.69 258.536  31
   1   4   5 8363.87 267.789  33
  -1  -4  -5 8739.04 491.475  34
   1   4   5 8816.72 374.821  36
  -1  -4  -5 8106.46 416.000   7
  -1  -4  -5 8148.12 301.398   3
   1   4   5 8934.57 469.451  30
  -1  -4  -5 8181.87 361.850   5
  -1  -4  -6 104.052 97.3723   1
  -1  -4  -6 404.390 123.855   5
  -1  -4  -6 488.755 149.341   7
  -1  -4  -6 424.281 171.604  34
   1   4   6-15.4626 147.368  30
   1   4   6 15.1059 73.2343  33
   1   4   6 47.4495 61.1915  31
   1   4   6 105.386 103.990  36
   1   4   7 533.023 201.164  30
  -1  -4  -7 906.867 154.179   1
   1   4   7 358.811 98.0452  31
  -1  -4  -7 650.490 138.298   5
   1   4   7 549.213 121.379  33
  -1  -4  -7 830.053 229.041  34
   1   4   7 363.638 103.934  36
  -1  -4  -7 684.158 157.341   7
   1   4   8 353.348 118.013  33
   1   4   8 295.988 168.806  30
  -1  -4  -8 430.373 189.294  34
  -1  -4  -8 679.236 146.782   1
  -1  -4  -8 677.778 152.057   7
   1   4   8 285.151 98.6169  31
  -1  -4  -8 688.467 163.051   5
   1   4   8 250.025 63.0320  35
  -1  -4  -9 301.168 103.773   1
  -1  -4  -9 445.180 198.865  34
   1   4   9 167.666 105.448  33
  -1  -4  -9 485.471 139.158   5
   1   4   9 75.7212 192.763  30
   1   4   9 50.9255 84.0604  31
   1   4  10 10036.8 539.678  33
   1   4  10 9602.97 426.147   8
   1   4  10 9396.58 493.097  31
  -1  -4 -10 9654.23 700.048  34
   1   4  10 10081.5 717.877  30
  -1  -4 -10 9065.80 525.102   5
  -1  -4 -10 9963.33 458.744   1
   1   4  11 1973.10 236.043  31
  -1  -4 -11 2255.67 236.743   1
  -1  -4 -11 1997.10 269.615   5
   1   4  11 1670.08 341.814  30
   1   4  11 1919.74 264.060  33
  -1  -4 -11 2214.77 355.037  34
   1   4  11 1912.16 211.129   8
  -1  -4 -12 10555.4 771.467  34
   1   4  12 11184.6 645.302  33
   1   4  12 11109.5 839.889  30
   1   4  12 10620.0 492.391   8
  -1  -4 -12 10453.5 515.556   1
  -1  -4 -12 11186.9 625.297   5
   1   4  12 10851.3 603.050  31
  -1  -4 -13 9891.73 510.540   1
   1   4  13 10148.4 655.109  33
   1   4  13 9850.00 588.775  31
   1   4  13 9896.03 834.930  30
   1   4  13 9199.39 479.238   8
  -1  -4 -13 9390.70 755.536  34
  -1  -4 -13 9579.09 625.171   5
   1   4  14 4822.68 474.386  33
  -1  -4 -14 5102.58 587.616  34
   1   4  14 4543.44 343.842   8
  -1  -4 -14 4385.13 445.411   5
   1   4  14 4407.84 447.676  31
   1   4  14 4914.42 626.852  30
   1   4  15 15340.7 663.870   8
   1   4  15 16917.2 939.100  33
  -1  -4 -15 15363.1 1026.06  34
   1   4  15 15797.5 1139.30  30
  -1  -4 -15 14573.7 842.756   5
   1   4  16 714.100 240.992  33
   1   4  16 402.783 279.027  30
  -1  -4 -16 309.063 200.674   5
  -1  -4 -16 858.694 310.046  34
  -1  -4 -17 6173.33 345.902  25
  -1  -4 -17 5425.03 672.086  34
   1   4  17 6699.65 813.007  30
  -1  -4 -17 5214.48 544.378   5
   1   4  17 6640.38 470.278  12
   1   4  17 5626.34 599.107  33
   1   4  18 8338.88 535.967  12
  -1  -4 -18 6528.09 401.130  25
  -1  -4 -18 7346.37 668.299   5
   1   4  18 6842.25 674.083  33
  -1  -4 -18 6301.34 696.413  34
   1   4  18 7512.65 872.931  30
  -1  -4 -18 7298.64 421.654  28
  -1  -4 -19 1516.44 219.983  28
   1   4  19 1942.52 309.996  12
   1   4  20 10783.0 633.385  12
  -1  -4 -20 9794.13 529.037  28
  -1  -4 -21 1495.82 229.138  28
   1   4  21 1541.51 291.336  12
   1   4  22 176.250 167.102  12
  -1  -4 -22-10.6288 144.042  28
   1   4  23 475.787 181.893  12
  -1  -4 -23 360.700 145.292  28
   1   4  24 244.275 163.084  12
   1   4  25 642.664 170.161  12
   1   4  26 1053.19 189.113  12
   1   4  27 1750.39 173.287  10
   1   4  27 1761.85 182.346  12
  -1  -5  23-37.7966 82.3490  20
  -1  -5  23-56.5351 90.1637  12
   1   5 -22 722.578 158.311  28
  -1  -5  22 830.590 163.081  12
   1   5 -21 299.696 141.913  28
  -1  -5  21 233.523 136.124  12
   1   5 -20 2364.47 271.216  28
  -1  -5  20 2419.20 283.439  12
   1   5 -19 2264.24 285.477  28
  -1  -5  19 1939.46 280.707  12
  -1  -5  18 1047.09 244.542  12
  -1  -5  18 825.858 246.644  22
   1   5 -18 1228.65 235.836  28
   1   5 -17-180.797 175.179  28
  -1  -5  17 198.038 168.375  12
  -1  -5  17 72.2583 170.654  22
  -1  -5  16 9.60184 148.912  12
   1   5 -16 198.061 152.403  28
  -1  -5  16 126.374 160.765  22
  -1  -5  15 398.110 179.492  12
   1   5 -15 99.5012 138.933  28
  -1  -5  15 156.704 209.119  33
   1   5 -15 113.296 162.822  32
  -1  -5  15 510.105 192.669  22
   1   5 -14 1336.52 252.438  28
  -1  -5  14 1494.18 251.117  12
  -1  -5  14 1824.57 415.033  33
   1   5 -14 1987.76 318.536  32
  -1  -5  14 1999.05 243.440  15
  -1  -5  14 1398.24 227.836  22
  -1  -5  13 1840.76 429.876  33
   1   5 -13 1492.51 286.830  32
   1   5 -13 1538.41 234.905   1
   1   5 -12 2079.63 276.030   5
  -1  -5  12 2011.91 403.588  33
   1   5 -12 2151.90 276.181   1
   1   5 -12 1549.99 290.516  32
   1   5 -11 798.696 203.151  32
  -1  -5  11 1051.12 288.861  35
  -1  -5  11 943.078 286.497  33
   1   5 -11 989.704 189.278   1
   1   5 -11 1169.91 207.355   5
  -1  -5  10 15814.1 958.736  33
   1   5 -10 14990.4 741.792  32
  -1  -5  10 15905.8 919.862  35
   1   5 -10 15144.2 715.642   1
   1   5 -10 16466.8 709.126   5
  -1  -5   9 2141.63 360.442  33
   1   5  -9 2372.62 287.427  32
   1   5  -9 2602.00 275.819   5
  -1  -5   9 1963.09 340.136  35
   1   5  -9 2389.32 272.608   1
   1   5  -8 7198.87 475.195  32
   1   5  -8 7717.11 440.418   5
   1   5  -8 7897.21 486.416   1
  -1  -5   8 6927.21 614.958  35
  -1  -5   8 7458.41 481.520   3
   1   5  -7 7764.11 472.495  32
  -1  -5   7 7697.75 464.821   3
  -1  -5   7 7571.78 585.507  35
   1   5  -7 8157.40 487.884   1
  -1  -5   6 8282.01 463.058   3
   1   5  -6 8975.16 485.282  32
  -1  -5   6 8095.24 605.589  35
   1   5  -6 8927.83 496.988   1
  -1  -5   5 14503.5 589.963   3
   1   5  -5 15421.8 465.822   4
   1   5  -5 14514.4 606.355  32
  -1  -5   5 13261.5 441.044  30
  -1  -5   5 13601.3 758.041  35
  -1  -5   4 4824.42 206.630  30
  -1  -5   4 5674.70 482.512  35
  -1  -5   4 5513.93 356.456   3
   1   5  -4 6053.43 376.479  32
   1   5  -4 6614.96 270.126   4
   1   5  -3 10892.4 348.447   4
   1   5  -3 10548.5 489.319  32
  -1  -5   3 9663.15 447.481   3
  -1  -5   3 9641.69 601.872  35
  -1  -5   2 334.846 196.608  35
  -1  -5   2 324.059 106.907   3
  -1  -5   2 541.414 187.800   6
   1   5  -2 201.993 124.015  32
  -1  -5   1 3960.88 350.779   6
   1   5  -1 4350.02 321.936  32
  -1  -5   1 3940.13 362.132  35
  -1  -5   1 3467.19 151.737  34
  -1  -5   1 4064.17 236.729  33
  -1  -5   1 4021.14 271.104   3
  -1  -5   0 22951.8 537.116  33
   1   5   0 21866.8 754.120  32
  -1  -5   0 21148.8 627.816   3
  -1  -5   0 21223.4 832.724   6
  -1  -5   0 21871.7 562.855  34
  -1  -5   0 22547.8 836.926  35
  -1  -5  -1 1525.18 89.3890  33
  -1  -5  -1 1356.15 151.220  34
  -1  -5  -1 1840.51 239.756  35
  -1  -5  -1 1652.42 256.071   6
   1   5   1 1498.75 118.838  30
   1   5   1 1491.09 224.744  32
  -1  -5  -1 1595.96 154.375   3
  -1  -5  -2 9996.07 445.830  34
   1   5   2 10415.2 372.383  30
  -1  -5  -2 10743.8 391.689   3
  -1  -5  -3 10135.9 474.067  34
   1   5   3 10040.3 406.799  30
  -1  -5  -3 10747.2 379.268   3
  -1  -5  -3 10827.1 392.450   5
  -1  -5  -4 2241.92 193.610   5
  -1  -5  -4 2589.30 183.029   3
   1   5   4 2353.60 232.365  36
   1   5   4 2502.84 251.015  30
   1   5   4 2183.51 87.0244  31
  -1  -5  -4 2237.17 269.026  34
   1   5   5 1550.83 181.793  36
   1   5   5 1010.80 59.2969  33
   1   5   5 1445.81 91.9664  31
  -1  -5  -5 1480.37 143.486   3
   1   5   5 1259.81 197.415  30
  -1  -5  -5 1488.45 174.533   5
  -1  -5  -5 1414.55 239.017  34
  -1  -5  -6 3637.17 209.379   3
   1   5   6 3537.00 350.827  30
   1   5   6 3599.80 176.074  31
  -1  -5  -6 3401.47 264.385   5
   1   5   6 3741.69 265.955  36
  -1  -5  -6 3588.54 311.685   7
  -1  -5  -6 3545.68 349.174  34
   1   5   6 3391.83 166.963  33
  -1  -5  -7 2667.23 248.256   5
  -1  -5  -7 2839.09 302.175   7
   1   5   7 2917.84 187.400  33
   1   5   7 2905.45 186.706  31
   1   5   7 3170.90 351.020  30
   1   5   7 2891.60 241.768  36
  -1  -5  -7 2714.28 355.969  34
  -1  -5  -7 2643.16 186.075   3
   1   5   8 2349.89 198.229  31
  -1  -5  -8 2487.86 262.038   5
   1   5   8 2694.00 346.632  30
  -1  -5  -8 2235.58 173.786   3
   1   5   8 2384.36 231.235  36
   1   5   8 2594.80 211.390  33
  -1  -5  -8 2168.49 340.120  34
  -1  -5  -8 2615.68 294.679   7
   1   5   9 1191.62 301.964  30
   1   5   9 1291.83 161.391  31
  -1  -5  -9 1178.44 199.130   5
  -1  -5  -9 1276.22 233.278   7
   1   5   9 1393.91 184.988  33
  -1  -5  -9 1120.52 130.088   3
  -1  -5  -9 1644.14 331.791  34
   1   5  10 1032.55 167.392  31
   1   5  10 1228.91 208.615  33
   1   5  10 1053.14 282.976  30
   1   5  10 965.609 154.179   8
  -1  -5 -10 962.512 269.925  34
  -1  -5 -10 991.167 193.007   5
  -1  -5 -11 10048.8 589.629   5
   1   5  11 10970.3 514.630   8
   1   5  11 11311.1 823.714  30
  -1  -5 -11 10203.6 776.448  34
   1   5  11 10948.2 541.477  31
  -1  -5 -11 10544.0 515.841   1
   1   5  11 11795.2 588.647  33
   1   5  12 16431.9 755.136  33
  -1  -5 -12 15912.7 981.138  34
   1   5  12 16303.3 701.176  31
  -1  -5 -12 15292.2 761.369   5
   1   5  12 16771.1 1067.11  30
  -1  -5 -12 15445.9 659.960   1
   1   5  12 15927.5 641.908   8
  -1  -5 -13 2172.24 320.338   5
   1   5  13 2340.92 263.801   8
  -1  -5 -13 2275.73 419.601  34
   1   5  13 2271.60 437.283  30
   1   5  13 2347.71 300.236  31
   1   5  13 2648.32 328.423  33
  -1  -5 -14-110.024 151.817   5
   1   5  14 221.866 238.980  30
  -1  -5 -14 147.713 224.468  34
   1   5  14 20.7820 119.126  31
   1   5  14 145.310 111.122   8
   1   5  14-151.407 153.300  33
   1   5  15 2775.48 313.709   8
   1   5  15 3496.13 425.585  33
   1   5  15 2739.36 508.289  30
  -1  -5 -15 2849.17 399.472   5
  -1  -5 -15 2970.49 501.936  34
  -1  -5 -16 252.564 264.764  34
   1   5  16-152.669 259.974  30
  -1  -5 -16-103.699 164.435   5
   1   5  16 226.441 157.986   8
  -1  -5 -17 690.519 303.743  34
  -1  -5 -17 187.873 190.496   5
  -1  -5 -17 759.882 160.948  25
   1   5  17 1006.99 389.001  30
  -1  -5 -18 273.354 238.575   5
  -1  -5 -18 481.579 327.504  34
   1   5  18-11.4654 156.828  12
  -1  -5 -18 135.329 134.023  25
   1   5  18-107.845 291.356  30
  -1  -5 -19 238.595 147.799  25
   1   5  19 16.2584 179.794  12
   1   5  20 245.928 201.159  12
   1   5  21 632.988 213.213  12
   1   5  22 163.375 181.668  12
   1   5  23 124.713 163.998  12
   1   5  24 175.789 162.298  12
   1   5  25 107.512 142.971  12
  -1  -5 -26-10.4953 73.1770  26
   1   5  26-100.426 116.320  12
   1   5  27 258.584 110.540  10
   1   5  27 89.2163 87.4663  12
  -1  -6  23 156.858 79.4821  20
  -1  -6  22 12.7547 96.6656  20
  -1  -6  22-3.46271 91.3518  12
  -1  -6  21-8.70139 117.625  12
   1   6 -21-59.3940 103.921  28
  -1  -6  20 218.513 145.164  12
   1   6 -20 152.348 127.051  28
   1   6 -19 17.6318 150.342  28
  -1  -6  19 18.7448 163.300  12
  -1  -6  18 167.581 145.850  12
   1   6 -18 55.5096 136.001  28
  -1  -6  17 525.930 236.638  22
  -1  -6  17 97.4552 151.430  12
   1   6 -17 491.076 177.262  28
  -1  -6  16 3624.07 358.263  22
   1   6 -16 4437.50 383.037  28
  -1  -6  16 4250.10 378.343  12
  -1  -6  15 1646.48 286.431  22
   1   6 -15 1691.01 276.809  28
  -1  -6  15 1723.13 263.117  12
  -1  -6  14 6213.08 449.635  22
   1   6 -14 7340.66 606.249  32
   1   6 -14 7852.84 482.518  28
  -1  -6  14 6898.33 461.865  12
  -1  -6  14 7411.16 423.092  15
  -1  -6  14 8523.67 817.921  33
   1   6 -13 878.269 178.432  28
   1   6 -13 832.027 202.892   1
  -1  -6  13 416.899 236.507  33
  -1  -6  13 779.096 176.573  15
  -1  -6  13 793.405 201.183  22
   1   6 -13 663.183 189.698  32
  -1  -6  13 704.910 184.222  12
  -1  -6  12-245.626 196.349  33
   1   6 -12 38.0089 143.075  32
   1   6 -12-193.174 150.185   1
   1   6 -11 245.035 167.264  32
   1   6 -11 221.001 128.272   1
  -1  -6  11 90.0968 198.318  35
  -1  -6  11 353.366 219.172  33
   1   6 -10 128.104 138.758  32
   1   6 -10-27.5299 157.102   1
  -1  -6  10 179.642 203.129  33
  -1  -6  10-176.750 226.310  35
   1   6  -9 3919.28 329.388   5
   1   6  -9 3458.47 352.428  32
   1   6  -9 3657.57 365.439   1
  -1  -6   9 3922.15 494.982  35
  -1  -6   9 3893.25 458.183  33
  -1  -6   8 2698.15 392.750  35
  -1  -6   8 3022.67 405.175  33
   1   6  -8 2912.50 334.087   1
   1   6  -8 3172.47 282.679   5
  -1  -6   8 2861.77 329.297   3
   1   6  -8 3042.26 322.439  32
  -1  -6   7 1706.41 247.471   3
   1   6  -7 1273.16 227.501  32
  -1  -6   7 1101.20 223.414  33
   1   6  -7 1449.41 251.116   1
  -1  -6   7 1033.89 292.571  35
   1   6  -6 518.439 205.231   1
  -1  -6   6 224.835 192.709  33
   1   6  -6 328.796 145.938  32
  -1  -6   6 273.734 140.159   3
  -1  -6   6 442.028 264.598  35
  -1  -6   5 25.1666 122.462   3
   1   6  -5-85.1195 149.566   1
  -1  -6   5 1.98952 205.374  35
   1   6  -5 136.520 112.277  32
  -1  -6   5-8.33325 125.982  33
  -1  -6   4 21913.1 824.367  33
   1   6  -4 22324.4 806.701  32
  -1  -6   4 22633.2 1019.82  35
  -1  -6   4 21136.2 772.667   3
   1   6  -4 24239.7 566.819   4
   1   6  -3 50.6085 54.5227   4
  -1  -6   3 169.320 205.170  35
  -1  -6   3 263.038 116.352  33
   1   6  -3-7.59035 137.500  32
  -1  -6   3 231.133 111.328   3
   1   6  -2 3510.86 310.555  32
  -1  -6   2 3218.08 253.440  33
  -1  -6   2 3336.67 278.725   3
  -1  -6   2 3530.72 408.743  35
  -1  -6   1 247.981 97.2081  33
  -1  -6   1 111.248 114.789   3
   1   6  -1 17.1467 123.765  32
  -1  -6   1 306.799 204.891   6
  -1  -6   1 98.4061 32.8779  34
  -1  -6   1 267.374 181.049  35
  -1  -6   0 9489.99 348.080  34
  -1  -6   0 9759.03 329.887  33
  -1  -6   0 9544.48 591.231   6
  -1  -6   0 9748.06 587.956  35
  -1  -6   0 9342.24 422.227   3
   1   6   0 9622.49 508.815  32
  -1  -6  -1 1684.36 93.3461  33
   1   6   1 2365.31 266.209  32
  -1  -6  -1 1891.44 190.837   3
  -1  -6  -1 2118.50 194.683  34
   1   6   1 1840.58 111.053  30
  -1  -6  -1 2114.34 278.281   6
  -1  -6  -1 2251.42 299.904  35
  -1  -6  -2 4034.62 301.526  34
   1   6   2 4191.89 227.105  30
  -1  -6  -2 4198.79 389.589  35
  -1  -6  -2 3756.19 254.004   3
  -1  -6  -3 5906.34 303.074   3
   1   6   3 6138.50 317.058  30
  -1  -6  -3 5906.11 383.478  34
   1   6   3 5157.39 167.634  31
   1   6   4 2841.86 265.726  36
   1   6   4 2884.06 259.330  30
  -1  -6  -4 2986.48 301.022  34
  -1  -6  -4 3218.53 221.499   3
  -1  -6  -4 3152.38 230.828   5
   1   6   5 527.645 156.289  36
   1   6   5 351.153 149.944  30
  -1  -6  -5 518.269 102.873   3
  -1  -6  -5 651.750 146.731   5
   1   6   5 431.870 45.8092  31
  -1  -6  -5 420.182 159.367  34
  -1  -6  -6 893.473 202.153  34
  -1  -6  -6 1216.70 175.269   5
   1   6   6 1018.00 210.969  30
  -1  -6  -6 1107.46 199.327   7
   1   6   6 978.907 173.333  36
  -1  -6  -6 1154.64 140.247   3
   1   6   6 1009.04 85.3064  31
   1   6   7 900.567 100.452  31
  -1  -6  -7 687.860 151.388   5
   1   6   7 799.916 219.084  30
  -1  -6  -7 680.803 100.579   3
  -1  -6  -7 955.967 257.689  34
  -1  -6  -7 1037.33 214.965   7
   1   6   7 928.424 162.531  36
  -1  -6  -8 1594.15 285.822  34
   1   6   8 1354.58 190.313  36
  -1  -6  -8 1496.65 247.595   7
   1   6   8 1454.02 129.042  33
  -1  -6  -8 1317.84 139.490   3
   1   6   8 1576.36 144.473  31
   1   6   8 1011.92 229.290  30
  -1  -6  -8 1503.59 217.514   5
   1   6   9 6527.27 323.585  31
   1   6   9 6173.73 546.835  30
  -1  -6  -9 5833.99 546.728  34
  -1  -6  -9 6203.72 490.434   7
   1   6   9 6139.58 313.801  33
  -1  -6  -9 5904.01 404.798   5
  -1  -6  -9 5606.33 280.077   3
   1   6   9 5683.72 372.988  36
  -1  -6 -10 16612.4 732.136   5
   1   6  10 17488.9 627.301  33
   1   6  10 17631.0 980.015  30
  -1  -6 -10 17379.4 985.228  34
   1   6  10 17625.0 613.949  31
   1   6  11 278.027 121.268   8
  -1  -6 -11 554.338 173.444   5
   1   6  11 607.929 247.751  30
  -1  -6 -11 492.609 262.882  34
   1   6  12 11264.2 559.468   8
  -1  -6 -12 10792.6 642.777   5
  -1  -6 -12 10270.5 809.262  34
   1   6  12 11165.1 866.237  30
  -1  -6 -13 359.785 259.307  34
   1   6  13 527.471 162.329   8
   1   6  13 468.840 219.390  30
  -1  -6 -13 471.853 208.787   5
  -1  -6 -14 693.174 214.081   5
  -1  -6 -14 743.892 306.711  34
   1   6  14 678.477 187.170   8
   1   6  14 670.712 341.143  30
  -1  -6 -15 1416.57 382.490  34
   1   6  15 1586.58 247.914   8
  -1  -6 -15 1044.12 252.601   5
   1   6  15 1583.68 436.235  30
  -1  -6 -16-154.966 152.698   5
  -1  -6 -16 384.964 257.466  34
   1   6  16 521.280 276.408  30
   1   6  16 0.77011 159.838   8
   1   6  17 71.0355 255.022  30
  -1  -6 -17-236.423 172.228   5
   1   6  17 58.2774 119.440   8
  -1  -6 -17 45.1916 265.953  34
  -1  -6 -17 370.413 157.152  29
  -1  -6 -17 259.675 154.020  25
   1   6  18 290.975 179.706  12
  -1  -6 -18 67.6162 123.864  25
  -1  -6 -18 215.153 116.417  29
  -1  -6 -18 92.3354 179.377   5
   1   6  18 658.310 368.332  30
  -1  -6 -18 344.687 262.502  34
  -1  -6 -19 193.178 150.815  25
   1   6  19 85.5200 167.953  12
   1   6  20 151.420 161.085  12
  -1  -6 -20 204.737 148.196  25
   1   6  21 827.129 217.820  12
   1   6  22 719.309 217.019  12
   1   6  23 918.178 220.480  12
   1   6  24 80.6399 152.641  12
   1   6  25 811.578 187.723  12
   1   6  26 889.912 173.188  12
  -1  -6 -26 814.413 129.202  26
   1   6  27 544.361 123.676  12
  -1  -7  22 528.161 116.934  20
  -1  -7  21-198.477 123.839  20
  -1  -7  21 158.070 89.5120  12
   1   7 -21-92.7299 98.5339  28
  -1  -7  20 722.999 156.694  12
   1   7 -20 634.760 149.005  28
  -1  -7  19 378.598 135.887  12
   1   7 -19 225.865 135.198  28
   1   7 -18 81.5334 151.123  28
  -1  -7  18 372.076 147.097  12
   1   7 -17 6.66505 137.148  28
  -1  -7  17 154.007 157.953  12
   1   7 -16 1481.26 229.436  28
  -1  -7  16 1080.19 252.304  22
  -1  -7  16 1051.10 221.371  12
  -1  -7  15 733.606 207.667  12
   1   7 -15 558.854 186.965  28
  -1  -7  15 880.124 228.337  22
  -1  -7  14 7004.93 425.055  14
  -1  -7  14 5408.70 425.130  22
  -1  -7  14 6627.04 399.418  15
   1   7 -14 5939.40 421.687  28
  -1  -7  14 5903.32 422.964  12
   1   7 -13 335.048 186.593  32
  -1  -7  13 161.636 166.122  22
   1   7 -13 233.613 172.193   1
  -1  -7  13 159.268 131.964  15
  -1  -7  13 276.673 130.520  14
  -1  -7  13 89.2610 130.776  12
  -1  -7  13-271.181 268.443  33
   1   7 -13 455.360 190.488  28
  -1  -7  12 10978.7 539.524  14
   1   7 -12 10767.5 687.167  32
  -1  -7  12 11919.8 933.619  33
   1   7 -12 11099.2 538.749  28
   1   7 -12 11365.0 682.275   1
  -1  -7  12 9501.90 541.111  22
  -1  -7  12 10606.6 485.515  15
   1   7 -11 124.200 144.070  32
   1   7 -11 346.520 188.221   1
  -1  -7  11 56.4821 175.419  33
   1   7 -10 793.312 210.027  32
  -1  -7  10 1052.18 319.056  35
  -1  -7  10 1378.25 330.207  33
   1   7 -10 894.175 230.850   1
   1   7  -9 495.216 163.897  32
  -1  -7   9 428.301 196.118  33
  -1  -7   9 495.301 286.559  35
   1   7  -9 199.198 178.476   1
  -1  -7   8 244.638 175.511  33
  -1  -7   8 387.068 273.120  35
   1   7  -8 413.710 177.724   1
   1   7  -8 353.523 150.107  32
  -1  -7   7 3966.64 507.798  35
  -1  -7   7 3875.34 378.502   3
  -1  -7   7 4340.85 452.607  33
   1   7  -7 4897.00 407.178  32
   1   7  -7 4106.05 413.069   1
  -1  -7   6 2641.60 434.604  35
  -1  -7   6 2426.78 345.296  33
   1   7  -6 2415.08 307.593   1
  -1  -7   6 2433.76 294.134   3
   1   7  -6 2557.40 291.038  32
  -1  -7   5 26241.5 995.494  33
   1   7  -5 26541.9 1020.34   1
   1   7  -5 24646.3 929.703  32
  -1  -7   5 25154.0 1200.25  35
  -1  -7   5 25871.4 932.231   3
  -1  -7   4 634.619 161.007  33
  -1  -7   4 1055.65 205.053   3
   1   7  -4 722.789 179.465  32
  -1  -7   4 1012.05 274.863  35
  -1  -7   3 844.363 273.136  35
  -1  -7   3 791.505 166.953  33
   1   7  -3 580.240 176.605  32
  -1  -7   3 810.058 183.250   3
  -1  -7   2 17057.3 674.830   3
  -1  -7   2 17523.9 922.026  35
   1   7  -2 18438.8 757.556  32
  -1  -7   2 17209.5 620.215  33
   1   7  -1 518.701 177.008  32
  -1  -7   1 589.580 124.797  33
  -1  -7   1 516.367 170.790   3
  -1  -7   1 656.861 303.306  35
  -1  -7   0 7925.75 428.364   3
  -1  -7   0 8281.60 594.549  35
  -1  -7   0 8197.66 313.886  34
   1   7   0 8509.31 505.297  32
  -1  -7   0 8343.71 308.310  33
  -1  -7  -1 279.197 125.611   3
   1   7   1 25.9761 150.435  32
  -1  -7  -1 295.882 104.880  34
  -1  -7  -2 186.686 114.439  34
  -1  -7  -2 161.480 168.943  35
   1   7   2 213.285 64.6816  30
   1   7   2-74.7521 160.472  32
  -1  -7  -2 168.916 94.8944   3
  -1  -7  -3 3713.53 325.939  34
   1   7   3 3768.43 250.083  30
  -1  -7  -3 3838.87 263.630   3
   1   7   4 9737.17 530.577  36
  -1  -7  -4 10136.9 563.469  34
   1   7   4 9641.72 456.493  30
  -1  -7  -4 9051.47 411.255   3
   1   7   5 10319.5 518.679  30
  -1  -7  -5 9972.06 408.124   3
  -1  -7  -5 10048.2 465.340   5
   1   7   5 10078.3 529.743  36
  -1  -7  -5 9901.46 598.476  34
  -1  -7  -6 811.798 222.467   7
   1   7   6 495.984 161.093  36
  -1  -7  -6 458.863 139.316   5
   1   7   6 520.588 190.252  30
  -1  -7  -6 667.407 122.768   3
  -1  -7  -6 522.887 183.775  34
  -1  -7  -7 587.762 161.660   5
  -1  -7  -7 623.658 111.401   3
  -1  -7  -7 594.370 178.148   7
   1   7   7 151.250 154.743  30
   1   7   7 430.498 134.658  36
  -1  -7  -7 491.856 193.944  34
  -1  -7  -8 14662.9 763.927   7
  -1  -7  -8 14092.0 627.264   5
   1   7   8 14330.1 624.017  36
  -1  -7  -8 12824.3 790.717  34
   1   7   8 13193.0 757.195  30
  -1  -7  -8 13812.2 469.007   3
  -1  -7  -9 11223.8 693.441   7
  -1  -7  -9 10232.6 755.633  34
   1   7   9 10134.4 701.309  30
   1   7   9 10507.9 547.258  36
  -1  -7  -9 10493.8 564.192   5
  -1  -7 -10 9397.82 546.388   5
  -1  -7 -10 9780.05 747.154  34
   1   7  10 9460.55 721.006  30
  -1  -7 -10 10319.2 680.492   7
   1   7  10 8784.89 513.140  36
   1   7  11 1896.10 375.304  30
  -1  -7 -11 2149.57 418.187  34
  -1  -7 -11 1959.74 277.962   5
   1   7  11 1943.23 242.243   8
   1   7  12 528.069 260.155  30
   1   7  12 869.271 189.648   8
  -1  -7 -12 742.285 203.617   5
  -1  -7 -12 590.534 272.346  34
  -1  -7 -13 16.4286 234.556  34
   1   7  13 131.587 133.167   8
  -1  -7 -13 5.08821 129.142   5
   1   7  13 291.364 290.261  30
   1   7  14 227.149 209.088  30
  -1  -7 -14-88.9866 165.066   5
  -1  -7 -14 42.9501 222.993  34
   1   7  14 199.074 167.048   8
  -1  -7 -15 636.428 309.394  34
   1   7  15 179.527 259.009  30
  -1  -7 -15 592.495 223.042   5
   1   7  15 612.416 182.293   8
   1   7  16 14565.4 734.902   8
   1   7  16 14510.3 1173.19  30
  -1  -7 -16 14317.0 1125.35  34
  -1  -7 -16 14327.1 878.377   5
  -1  -7 -17 1558.86 406.632  34
  -1  -7 -17 1337.77 205.046  29
  -1  -7 -17 1205.23 220.965  25
   1   7  17 750.499 198.962   8
  -1  -7 -17 1159.72 201.309   9
   1   7  17 1374.39 428.396  30
  -1  -7 -17 913.306 237.325   5
  -1  -7 -18 700.457 165.906  29
   1   7  18 1118.09 226.787  12
  -1  -7 -18 367.888 216.193   5
   1   7  18 403.905 256.208  30
  -1  -7 -18 757.881 191.931  25
  -1  -7 -19-102.823 117.586  29
  -1  -7 -19-40.7390 130.214  25
   1   7  19-84.8959 206.995  12
  -1  -7 -20 475.673 154.030  29
   1   7  20 461.166 179.885  12
  -1  -7 -20 232.555 154.718  25
  -1  -7 -21 1314.77 190.992  29
   1   7  21 1332.11 242.540  12
   1   7  22 158.477 154.799  12
   1   7  23-73.7501 149.043  12
   1   7  24 242.016 149.709  12
   1   7  25-154.526 135.421  12
  -1  -7 -26 23.3881 80.6820  26
   1   7  26 415.119 131.161  12
   1   7  27 250.564 82.0030  12
  -1  -8  21 895.608 139.972  20
  -1  -8  20 81.3560 115.762  20
   1   8 -20 109.930 91.0444  28
   1   8 -19 359.084 113.562  28
   1   8 -18-253.590 137.686  28
  -1  -8  18-69.8312 107.863  12
   1   8 -17 1364.75 221.008  28
  -1  -8  17 1172.29 192.994  12
  -1  -8  16 596.222 166.246  12
   1   8 -16 1072.91 192.875  28
  -1  -8  15-8.63454 127.290  12
  -1  -8  15 301.412 134.491  14
   1   8 -15 193.650 129.298  28
   1   8 -14-66.1585 141.854  28
  -1  -8  14-67.3938 138.142  14
  -1  -8  13 1251.49 235.386  22
   1   8 -13 1978.85 264.921  28
  -1  -8  13 1670.15 262.666  14
  -1  -8  13 1814.99 238.369  15
  -1  -8  12-57.9722 188.419  33
   1   8 -12-83.1650 115.598  28
   1   8 -12 28.1022 152.320   1
  -1  -8  12 89.1464 191.050  22
  -1  -8  12 147.292 148.791  15
  -1  -8  12-58.6200 148.013  14
   1   8 -12-189.298 161.206  32
  -1  -8  11 288.699 172.932  14
  -1  -8  11-117.665 166.720  22
   1   8 -11 92.2738 150.365   1
  -1  -8  11-90.4305 222.148  33
  -1  -8  11 242.174 125.138  15
   1   8 -11 85.5941 141.280  32
  -1  -8  10 1220.49 358.788  35
   1   8 -10 1212.67 259.206  32
   1   8 -10 996.906 257.530   1
  -1  -8  10 519.314 199.621  33
   1   8  -9-202.321 164.804  32
  -1  -8   9-75.2640 169.912  33
   1   8  -9-14.6700 168.326   1
  -1  -8   9 406.702 256.655  35
   1   8  -8 2166.78 291.103  32
   1   8  -8 2430.93 353.225   1
  -1  -8   8 2304.72 373.014  33
  -1  -8   8 1792.65 392.243  35
   1   8  -7 977.047 228.817   1
  -1  -8   7 1136.44 346.097  35
  -1  -8   7 1017.77 241.781  33
  -1  -8   7 1262.08 251.048   3
   1   8  -7 1051.68 222.402  32
  -1  -8   6 170.714 219.555  35
  -1  -8   6 88.0385 140.036   3
   1   8  -6 368.047 213.874   1
  -1  -8   6 180.984 172.983  33
   1   8  -6 106.795 113.770  32
  -1  -8   5 1455.68 259.285   3
   1   8  -5 1850.63 326.244   1
  -1  -8   5 1816.52 264.340  33
   1   8  -5 1679.05 238.141  32
  -1  -8   5 1898.14 390.719  35
   1   8  -4 4962.35 410.560  32
  -1  -8   4 4133.60 381.286   3
  -1  -8   4 4945.67 380.749  33
  -1  -8   4 4733.86 547.467  35
  -1  -8   3 2899.21 406.740  35
  -1  -8   3 2984.01 269.684  33
  -1  -8   3 2779.34 296.537   3
   1   8  -3 3178.04 328.979  32
  -1  -8   2 187.640 209.409  35
   1   8  -2 295.672 146.563  32
  -1  -8   2 189.746 139.056   3
   1   8  -1 25490.6 966.946  32
  -1  -8   1 24850.2 863.643   3
  -1  -8   1 23976.4 1145.69  35
  -1  -8   0 3363.79 439.510  35
  -1  -8   0 2903.57 285.106   3
   1   8   0 2900.39 329.373  32
  -1  -8  -1 712.381 154.618   3
   1   8   1 780.617 220.709  32
  -1  -8  -1 1084.53 298.812  35
  -1  -8  -2 6016.51 380.166   3
  -1  -8  -2 6699.41 555.537  35
   1   8   2 7164.37 525.575  32
  -1  -8  -2 6776.40 403.478  34
  -1  -8  -3 12380.3 602.271  34
  -1  -8  -3 13610.8 540.319   3
   1   8   4 4703.69 314.880  30
   1   8   4 4877.28 403.593  36
  -1  -8  -4 4752.07 402.400  34
  -1  -8  -4 4743.12 321.939   3
   1   8   5 123.486 127.540  36
  -1  -8  -5 441.534 206.103  34
  -1  -8  -5 352.730 113.541   3
   1   8   5 275.813 120.996  30
  -1  -8  -6 356.218 127.852   5
   1   8   6 71.0890 136.275  30
  -1  -8  -6 352.057 174.788   7
  -1  -8  -6 315.973 86.6944   3
   1   8   6 281.615 133.579  36
  -1  -8  -6 147.460 174.429  34
  -1  -8  -7 267.307 203.251  34
   1   8   7 218.708 173.120  30
  -1  -8  -7 347.232 191.594   7
  -1  -8  -7 165.521 124.449   5
   1   8   7 263.985 144.988  36
  -1  -8  -7 322.765 112.551   3
  -1  -8  -8 6813.45 599.535  34
   1   8   8 7237.57 466.931  36
   1   8   8 6444.58 516.377  30
  -1  -8  -8 6985.10 566.980   7
  -1  -8  -8 6636.35 447.015   5
  -1  -8  -9 2175.58 358.805  34
   1   8   9 2102.79 352.176  30
   1   8   9 1969.62 256.964  36
  -1  -8  -9 1821.54 310.166   7
  -1  -8  -9 1777.94 251.657   5
  -1  -8 -10 1951.45 276.503   5
  -1  -8 -10 2436.90 421.418  34
   1   8  10 2164.37 269.905  36
   1   8  10 1677.41 335.581  30
  -1  -8 -10 2156.71 348.808   7
   1   8  11 2028.54 388.878  30
  -1  -8 -11 1761.19 377.704  34
  -1  -8 -11 1592.41 262.774   5
   1   8  12 295.175 218.531  30
  -1  -8 -12 639.023 280.108  34
  -1  -8 -12 75.3668 139.381   5
   1   8  12 118.117 148.777   8
   1   8  13 1570.70 402.113  30
   1   8  13 1947.38 290.784   8
  -1  -8 -13 1552.45 271.892   5
  -1  -8 -13 1780.75 418.453  34
   1   8  14 1481.32 375.366  30
   1   8  14 1540.60 240.465   8
  -1  -8 -14 1639.20 418.065  34
  -1  -8 -14 1938.10 328.751   5
   1   8  15 6965.48 519.418   8
  -1  -8 -15 6907.54 603.416   5
  -1  -8 -15 6640.41 761.817  34
   1   8  15 7020.98 764.324  30
  -1  -8 -16 1419.95 210.857   9
   1   8  16 1360.77 447.088  30
  -1  -8 -16 760.603 257.830   5
   1   8  16 1207.94 250.535   8
  -1  -8 -16 968.697 351.093  34
  -1  -8 -16 1411.31 198.016  25
  -1  -8 -16 1237.80 200.293  29
   1   8  17 3641.66 395.041   8
  -1  -8 -17 2874.04 302.473   9
  -1  -8 -17 3388.19 467.525   5
  -1  -8 -17 2190.62 401.346  34
   1   8  17 3130.77 542.530  30
  -1  -8 -17 4041.75 323.605  25
  -1  -8 -17 4334.58 322.229  29
  -1  -8 -18 3727.04 299.105  29
  -1  -8 -18 3048.30 299.528  25
  -1  -8 -18 2885.29 293.123   9
   1   8  18 2980.05 328.987  12
   1   8  19 2990.20 321.882  12
  -1  -8 -19 2894.85 301.830  25
  -1  -8 -19 3270.91 297.687   9
  -1  -8 -19 3681.63 293.443  29
  -1  -8 -20 49.0106 129.086  25
  -1  -8 -20 260.990 132.340  29
   1   8  20-3.07705 163.596  12
   1   8  21 120.517 155.078  12
  -1  -8 -21 196.310 111.987  29
  -1  -8 -21-66.7645 135.149  25
   1   8  22 682.837 186.354  12
  -1  -8 -22 474.869 129.461  29
   1   8  23 111.617 135.900  12
   1   8  24-73.8059 148.304  12
   1   8  25 73.4254 117.073  12
  -1  -8 -25 30.9749 103.096  26
   1   8  26 281.847 115.326  12
  -1  -8 -26 186.729 93.2466  26
  -1  -9  20 260.379 114.131  20
  -1  -9  19 1007.04 177.708  20
  -1  -9  18 27.2054 121.172  20
   1   9 -18 167.342 107.035  28
   1   9 -17 1076.18 170.001  28
  -1  -9  16 178.160 112.415  14
   1   9 -16 282.388 131.240  28
   1   9 -15 632.816 152.402  28
  -1  -9  15 806.338 157.401  17
  -1  -9  15 1003.17 188.405  14
   1   9 -14 1817.81 235.459  28
  -1  -9  14 2199.05 267.423  14
  -1  -9  13 348.821 174.480  14
   1   9 -13 69.6566 118.535  28
  -1  -9  13 11.4682 127.126  15
  -1  -9  12 135.179 143.979  14
  -1  -9  12-206.586 139.579  15
  -1  -9  11 446.378 175.946  14
   1   9 -11 510.849 181.104   1
   1   9 -10 16963.2 914.909   1
  -1  -9  10 14076.2 653.584  14
   1   9 -10 16661.1 835.797  32
  -1  -9   9 936.695 208.923  14
   1   9  -9 682.650 209.987  32
   1   9  -9 924.988 269.491   1
   1   9  -8 783.438 255.335   1
   1   9  -8 784.484 215.571  32
  -1  -9   8 281.600 241.470  35
   1   9  -7 26.0964 130.675  32
   1   9  -7 366.980 224.048   1
  -1  -9   7-170.826 245.651  35
  -1  -9   6 134.107 240.027  35
   1   9  -6 80.0456 128.188  32
  -1  -9   6 82.0970 155.035   3
   1   9  -6 407.164 216.417   1
  -1  -9   5 2021.33 458.461  35
   1   9  -5 1690.53 275.396  32
   1   9  -5 1372.55 253.392   1
  -1  -9   5 1245.94 260.357   3
   1   9  -4 4810.53 480.144   1
  -1  -9   4 4969.94 582.188  35
   1   9  -4 5270.00 440.682  32
  -1  -9   4 4439.42 411.685   3
  -1  -9   3 3101.18 353.076   3
   1   9  -3 3309.62 350.350  32
  -1  -9   3 3149.85 485.512  35
  -1  -9   2 364.406 242.638  35
   1   9  -2 317.998 157.134  32
  -1  -9   2 160.418 144.338   3
  -1  -9   1 507.389 258.914  35
   1   9  -1 154.604 129.970  32
  -1  -9   1 607.768 174.445   3
  -1  -9   0 692.512 173.216   3
  -1  -9   0 1255.75 330.683  35
   1   9   0 913.920 228.357  32
  -1  -9  -1 11072.7 556.254   3
  -1  -9  -1 12489.3 832.234  35
   1   9   1 11061.7 663.066  32
  -1  -9  -2 137.856 117.080   3
   1   9   2-108.957 180.920  32
  -1  -9  -3 9199.56 520.417  34
  -1  -9  -3 9760.24 484.663   3
   1   9   3 9067.07 621.608  32
   1   9   4 2557.99 339.749  36
  -1  -9  -4 2498.49 237.136   3
  -1  -9  -4 2492.33 303.147  34
  -1  -9  -5 648.123 132.984   3
  -1  -9  -5 266.911 172.671  34
   1   9   5 175.097 140.169  36
  -1  -9  -6 3973.50 439.248   7
   1   9   6 4739.25 412.626  36
  -1  -9  -6 4306.03 289.045   3
  -1  -9  -6 4216.27 449.095  34
  -1  -9  -7 459.922 141.019   5
  -1  -9  -7 19.1573 197.599  34
   1   9   7 155.575 124.903  30
  -1  -9  -7 326.754 185.624   7
   1   9   7 98.4014 125.198  36
   1   9   8 1189.67 215.707  36
   1   9   8 1220.85 253.961  30
  -1  -9  -8 1087.20 274.400   7
  -1  -9  -8 1137.60 278.322  34
  -1  -9  -8 1312.32 202.244   5
  -1  -9  -9 4538.66 531.346  34
  -1  -9  -9 4593.44 379.477   5
  -1  -9  -9 4226.35 480.159   7
   1   9   9 4660.24 398.444  36
   1   9   9 4201.79 430.943  30
   1   9  10 3047.94 395.653  30
  -1  -9 -10 3141.07 353.507   5
   1   9  10 3385.69 345.735  36
  -1  -9 -10 2977.99 405.404   7
  -1  -9 -10 3067.02 454.496  34
  -1  -9 -11 211.434 258.350  34
  -1  -9 -11-17.9096 134.776   5
  -1  -9 -11 27.4738 157.397   7
   1   9  11-318.460 213.113  30
   1   9  12 1145.71 320.174  30
   1   9  12 1191.32 244.333   8
  -1  -9 -12 927.500 273.498  34
  -1  -9 -12 1033.37 235.504   5
   1   9  13 1585.17 275.463   8
  -1  -9 -13 1623.52 401.746  34
   1   9  13 1459.08 391.254  30
  -1  -9 -13 1651.67 304.103   5
  -1  -9 -14 719.778 236.318   5
   1   9  14 1403.30 397.669  30
  -1  -9 -14 1448.06 405.708  34
   1   9  14 1034.82 264.120   8
  -1  -9 -15 268.742 141.002   9
  -1  -9 -15 709.068 158.067  25
   1   9  15 46.5271 167.667   8
  -1  -9 -15 126.537 134.475  29
  -1  -9 -15 0.99119 208.518  34
  -1  -9 -15 170.384 192.368   5
   1   9  15 375.628 264.407  30
  -1  -9 -16-328.737 346.254  34
   1   9  16 239.706 310.842  30
  -1  -9 -16 112.110 117.464  29
  -1  -9 -16 565.826 251.187   5
   1   9  16 515.990 218.552   8
  -1  -9 -16 294.849 163.423   9
  -1  -9 -16 288.620 135.448  25
  -1  -9 -17 1624.86 247.091  25
  -1  -9 -17 1618.88 224.532  29
  -1  -9 -17 1409.42 224.447   9
  -1  -9 -18 253.249 148.814   9
  -1  -9 -18 391.408 156.995  29
   1   9  18 431.423 168.303  12
  -1  -9 -18 323.871 171.975  25
  -1  -9 -19 387.508 163.447   9
  -1  -9 -19 593.519 177.124  29
  -1  -9 -19 442.984 172.477  25
   1   9  19 389.386 194.594  12
  -1  -9 -20 253.290 163.060  25
  -1  -9 -20 76.4176 134.953   9
  -1  -9 -20 95.5637 126.849  29
   1   9  20 48.9855 148.712  12
  -1  -9 -21 1003.31 198.853  25
  -1  -9 -21 1288.62 201.372   9
   1   9  21 1330.83 233.947  12
  -1  -9 -21 949.880 176.341  29
  -1  -9 -22 86.2215 101.703  29
   1   9  22 151.518 139.004  12
  -1  -9 -23 1643.19 182.715  29
   1   9  23 1449.76 209.897  12
   1   9  24 808.861 163.817  12
   1   9  25 2029.48 198.586  12
  -1  -9 -25 1782.53 209.980  26
   1   9  26 418.909 102.598  12
  -1  -9 -26 491.835 108.613  26
  -1 -10  19 135.259 101.659  20
  -1 -10  18 624.659 159.363  20
  -1 -10  17 429.134 164.144  20
  -1 -10  16 477.355 135.798  14
  -1 -10  15-27.4770 131.858  14
  -1 -10  15 54.4131 92.9877  17
  -1 -10  14-148.667 129.098  17
  -1 -10  14 89.8439 151.972  14
  -1 -10  13 130.496 131.647  17
  -1 -10  13 202.502 142.792  14
  -1 -10  12 2715.93 301.378  14
  -1 -10  11 439.920 181.080  14
  -1 -10  10 517.944 189.190  14
  -1 -10   9 2218.23 283.507  14
   1  10  -9 2698.94 396.657   1
   1  10  -8 508.432 214.408  32
   1  10  -8 541.010 249.900   1
  -1 -10   8 326.438 153.242  14
  -1 -10   7 136.333 130.596  14
   1  10  -7-37.9985 123.741  32
  -1 -10   7 373.927 282.952  35
   1  10  -7 224.036 192.543   1
  -1 -10   6 387.604 244.293  35
   1  10  -6 667.432 236.653   1
   1  10  -6 526.599 172.946  32
  -1 -10   5 3984.97 587.786  35
   1  10  -5 4580.61 428.048  32
  -1 -10   5 3364.46 404.309   3
   1  10  -5 4648.98 493.693   1
   1  10  -4 950.965 212.701  32
   1  10  -4 1180.16 301.491   1
  -1 -10   4 787.839 245.200   3
  -1 -10   4 576.452 292.566  35
  -1 -10   3 269.291 147.758   3
   1  10  -3 603.750 179.781  32
  -1 -10   3 389.844 283.524  35
  -1 -10   2 741.036 197.627   3
   1  10  -2 955.224 222.053  32
  -1 -10   2 320.482 215.959  35
   1  10  -1 299.328 158.885  32
  -1 -10   1 251.678 135.015   3
  -1 -10   1 138.347 250.494  35
  -1 -10   0 3839.61 363.377   3
  -1 -10   0 3557.43 505.117  35
   1  10   0 4442.04 439.744  32
   1  10   1 5076.97 453.877  32
  -1 -10  -1 5147.70 407.419   3
   1  10   2 4961.52 453.030  32
  -1 -10  -2 4780.25 369.202   3
  -1 -10  -3 6334.48 420.467   3
   1  10   3 6457.44 539.600  32
   1  10   4 2093.02 322.466  32
   1  10   4 1828.67 298.777  36
  -1 -10  -4 1958.79 212.655   3
  -1 -10  -5 182.585 131.090  34
   1  10   5 147.858 141.097  36
  -1 -10  -5 117.790 156.056   7
  -1 -10  -5 131.549 95.4519   3
   1  10   6 2106.88 303.999  36
  -1 -10  -6 2382.20 377.714   7
  -1 -10  -6 2450.40 361.663  34
  -1 -10  -7 416.206 221.798  34
  -1 -10  -7 280.276 161.784   7
   1  10   7 711.803 224.580  36
  -1 -10  -8 268.019 180.903   7
  -1 -10  -8 84.3391 169.597  34
   1  10   8 511.333 191.732  36
  -1 -10  -9 263.612 126.565   5
  -1 -10  -9 333.547 209.812  34
   1  10   9 495.944 184.799  36
  -1 -10  -9 323.695 172.506   7
   1  10  10 122.026 142.619  36
  -1 -10 -10 14.3077 234.756  34
  -1 -10 -10 246.442 206.185   7
  -1 -10 -10 221.108 146.532   5
   1  10  10 75.0649 153.669  30
  -1 -10 -11 1286.39 252.675   5
  -1 -10 -11 1151.02 317.414  34
  -1 -10 -11 1345.01 349.738   7
   1  10  11 670.464 224.764  30
   1  10  11 988.899 211.798  36
  -1 -10 -12 2603.33 452.858  34
  -1 -10 -12 3220.56 368.465   5
   1  10  12 2568.81 431.381  30
   1  10  12 2339.04 312.552   8
  -1 -10 -13 990.511 211.377   5
  -1 -10 -13 1044.64 367.095  34
   1  10  13 790.880 301.479  30
   1  10  13 838.255 224.865   8
  -1 -10 -14 599.662 314.245  34
   1  10  14 661.234 317.511  30
  -1 -10 -14 258.698 133.052  29
   1  10  14 355.735 197.431   8
  -1 -10 -14 308.840 166.436   9
  -1 -10 -14 289.326 122.092  25
  -1 -10 -14 216.208 166.178   5
  -1 -10 -15 1354.22 288.736   5
  -1 -10 -15 1423.33 356.279  34
   1  10  15 1908.30 420.457  30
   1  10  15 1611.42 302.808   8
  -1 -10 -15 1094.28 184.782   9
  -1 -10 -15 1471.69 211.809  29
  -1 -10 -15 1481.87 199.476  25
  -1 -10 -16 177.477 130.095  29
  -1 -10 -16 227.748 184.744   9
  -1 -10 -16 315.752 152.422  25
  -1 -10 -16-3.31397 173.800   5
   1  10  16 114.183 236.152  30
  -1 -10 -17 2129.58 260.170  25
  -1 -10 -17 1774.35 270.559   9
  -1 -10 -17 2580.09 263.796  29
  -1 -10 -18 316.810 169.052  29
  -1 -10 -18 415.555 170.730   9
  -1 -10 -18 219.748 157.735  25
   1  10  19 650.586 171.101  12
  -1 -10 -19 1185.51 227.182   9
  -1 -10 -19 980.946 203.265  25
  -1 -10 -19 961.731 199.170  29
   1  10  20 72.2311 134.812  12
  -1 -10 -20 604.727 173.771  25
  -1 -10 -20 430.933 183.351   9
  -1 -10 -20 814.418 193.453  29
   1  10  21-141.624 133.847  12
  -1 -10 -21-131.448 147.020   9
  -1 -10 -21-16.2606 119.031  29
  -1 -10 -21-154.241 119.005  25
   1  10  22 676.098 175.944  12
  -1 -10 -22 402.833 133.848  29
   1  10  23 99.2528 106.255  12
  -1 -10 -23 54.0906 89.8849  29
  -1 -10 -24 307.385 137.528  26
   1  10  24 353.105 108.931  12
  -1 -10 -25 62.9990 94.9661  26
  -1 -10 -26 231.953 91.7983  26
  -1 -11  18-180.267 97.3905  20
  -1 -11  17 2.22225 118.356  20
  -1 -11  16 285.983 129.261  14
  -1 -11  16 337.318 153.402  20
  -1 -11  15-16.2354 87.1263  17
  -1 -11  15 190.266 120.748  14
  -1 -11  15-167.665 168.030  20
  -1 -11  14 993.369 176.293  17
  -1 -11  14 1225.97 208.189  14
  -1 -11  14 921.489 225.460  20
  -1 -11  13 1769.80 228.058  17
  -1 -11  13 2852.33 303.060  14
  -1 -11  12-62.5691 116.168  17
  -1 -11  12 276.013 167.573  14
  -1 -11  11 1711.81 264.524  14
  -1 -11  11 1099.78 201.563  17
  -1 -11  10 181.522 138.519  17
  -1 -11  10 79.8242 163.331  14
  -1 -11   9 349.623 180.421  14
  -1 -11   8 746.501 180.679  14
  -1 -11   7 56.3379 160.916  14
   1  11  -7 366.046 262.875   1
  -1 -11   6 311.533 163.411  14
   1  11  -6 416.797 227.081   1
   1  11  -5-191.334 239.493   1
   1  11  -5 206.017 185.497  32
  -1 -11   5 139.863 173.048  14
  -1 -11   4 519.976 221.195   3
   1  11  -4 421.748 191.071  32
   1  11  -4 321.490 249.330   1
   1  11  -3 3814.55 479.375   1
   1  11  -3 3946.86 401.160  32
  -1 -11   3 3467.40 390.700   3
   1  11  -2 4582.47 445.498  32
  -1 -11   2 3989.32 414.396   3
   1  11  -1 16.8988 134.427  32
  -1 -11   1 198.311 139.764   3
   1  11   0 72.0596 160.631  32
  -1 -11   0-71.8763 124.974   3
  -1 -11  -1 2355.74 289.065   3
   1  11   1 2453.82 343.257  32
  -1 -11  -2 377.777 166.100   3
   1  11   2 358.342 180.332  32
   1  11   3 252.675 153.819  32
  -1 -11  -3 66.4757 123.273   3
  -1 -11  -4 5755.23 402.857   3
   1  11   4 5537.11 501.688  32
  -1 -11  -4 5310.20 549.345   7
   1  11   4 5800.38 536.677  36
   1  11   5 180.189 169.187  32
   1  11   5 3.66191 160.595  36
  -1 -11  -5-2.49359 166.123   7
   1  11   6 28.3118 168.535  32
   1  11   6 64.7160 145.631  36
  -1 -11  -6-92.9986 155.258   7
  -1 -11  -7 936.349 232.642  34
  -1 -11  -7 982.804 288.286   7
   1  11   7 1076.96 243.666  36
   1  11   8 1034.14 241.205  36
  -1 -11  -8 863.707 295.292   7
  -1 -11  -8 932.916 249.415  34
  -1 -11  -9 764.759 263.804  34
   1  11   9 819.991 211.111  36
  -1 -11  -9 553.172 203.101   7
   1  11  10 1024.58 215.300  36
  -1 -11 -10 1472.99 354.270   7
  -1 -11 -10 1115.38 292.588  34
   1  11  11 73.2650 149.143  36
   1  11  11 62.5537 164.423   8
  -1 -11 -11-73.7840 183.104  34
  -1 -11 -11 94.9136 207.843   7
  -1 -11 -12-1.79561 192.071  34
  -1 -11 -12-70.7445 117.887  25
  -1 -11 -12-299.917 163.360   5
  -1 -11 -12 22.0419 134.640   9
   1  11  12-310.617 205.999   8
  -1 -11 -12 103.215 128.395  29
  -1 -11 -13 996.058 190.375   9
  -1 -11 -13 566.394 193.745   5
   1  11  13 941.555 213.946   8
  -1 -11 -13 838.321 183.151  29
  -1 -11 -13 954.720 155.797  25
  -1 -11 -13 746.217 297.198  34
  -1 -11 -14 2.50924 143.712  29
  -1 -11 -14 39.1572 152.498   9
  -1 -11 -14-22.0558 223.024  34
   1  11  14-258.075 158.069   8
  -1 -11 -14 65.0608 115.552  25
  -1 -11 -14-10.4396 140.210   5
  -1 -11 -15 3596.70 299.787  29
  -1 -11 -15 3312.79 340.957   9
  -1 -11 -15 3210.10 265.387  25
  -1 -11 -15 2830.00 374.876   5
  -1 -11 -16 340.572 162.175  25
  -1 -11 -16 599.114 207.406   9
  -1 -11 -16 352.957 144.525  29
  -1 -11 -17 109.705 145.087   9
  -1 -11 -17 193.067 131.890  25
  -1 -11 -17 47.8082 136.606  29
  -1 -11 -18 1732.28 264.222   9
  -1 -11 -18 2222.16 252.757  29
  -1 -11 -18 1680.05 228.993  25
  -1 -11 -19 1909.61 241.276  29
  -1 -11 -19 1404.13 235.649   9
  -1 -11 -19 1149.31 206.344  25
  -1 -11 -20 1030.76 200.524   9
  -1 -11 -20 1043.39 186.318  29
  -1 -11 -20 919.460 174.341  25
  -1 -11 -21 246.340 125.616   9
  -1 -11 -21 292.274 129.374  25
  -1 -11 -21 459.972 138.879  29
  -1 -11 -22 606.149 152.447  29
  -1 -11 -22 442.999 126.724  25
  -1 -11 -23 64.9106 90.5568  29
  -1 -11 -23-9.01445 129.173  26
  -1 -11 -24 228.084 83.9406  29
  -1 -11 -24 128.167 108.211  26
  -1 -11 -25 38.9023 96.4894  26
  -1 -12  17 131.993 94.9861  20
  -1 -12  16 397.712 131.307  20
  -1 -12  15 670.988 161.840  20
  -1 -12  15 834.961 126.421  17
  -1 -12  15 1161.38 167.613  14
  -1 -12  14 87.1873 96.4305  17
  -1 -12  14-179.074 137.322  14
  -1 -12  14 88.3074 126.998  20
  -1 -12  13 78.9972 141.985  20
  -1 -12  13 91.8384 107.430  17
  -1 -12  13 155.293 124.265  14
  -1 -12  12 214.287 144.212  20
  -1 -12  12 311.263 135.920  17
  -1 -12  12 123.362 133.330  14
  -1 -12  11 85.4565 123.904  17
  -1 -12  11 187.589 166.181  20
  -1 -12  11 306.840 150.715  14
  -1 -12  10 113.906 144.152  14
  -1 -12  10 444.832 215.993  20
  -1 -12  10 163.299 131.416  17
  -1 -12   9 407.647 156.208  20
  -1 -12   9 606.657 184.202  17
  -1 -12   9 799.020 208.513  14
  -1 -12   8 1235.97 222.281  14
  -1 -12   8 1087.61 218.411  17
  -1 -12   8 1067.18 239.341  20
  -1 -12   7 2635.77 321.497  14
  -1 -12   7 2255.66 313.751  20
  -1 -12   7 2448.60 287.791  17
  -1 -12   6 7788.17 492.673  14
  -1 -12   6 7734.32 506.365  20
  -1 -12   6 6874.59 456.502  17
  -1 -12   5 6141.78 425.057  17
  -1 -12   5 6643.38 447.601  14
  -1 -12   5 6839.45 468.155  20
  -1 -12   4 6358.52 437.331  14
  -1 -12   4 6252.54 440.962  20
  -1 -12   4 5601.67 405.213  17
  -1 -12   3 943.199 247.549   3
  -1 -12   3 233.116 155.921  14
   1  12  -3 798.529 258.616   1
  -1 -12   3 362.195 128.500  17
  -1 -12   2 37.5143 136.010  14
   1  12  -2 458.807 246.725   1
  -1 -12   2 23.7576 122.758   3
  -1 -12   2 271.746 150.444  17
  -1 -12   1 238.663 165.973   3
  -1 -12   0 3409.58 370.330   3
   1  12   0 4266.52 428.698  32
  -1 -12  -1 587.516 181.713   3
   1  12   1 104.758 150.965  32
  -1 -12  -2 3698.79 359.623   3
   1  12   2 3465.73 408.532  32
   1  12   3 6112.62 583.305  36
   1  12   3 6767.58 568.126  32
  -1 -12  -3 7015.92 463.328   3
  -1 -12  -3 6060.02 610.198   7
   1  12   4 323.087 170.526  32
   1  12   4 317.401 200.483  36
  -1 -12  -4 596.698 233.917   7
   1  12   5 728.828 206.237  32
   1  12   5 797.412 233.899  36
  -1 -12  -5 590.020 237.878   7
   1  12   6 1849.93 309.723  32
   1  12   6 2426.19 361.507  36
  -1 -12  -6 2082.45 376.803   7
  -1 -12  -7 299.248 174.066   7
   1  12   7 432.772 196.627  36
   1  12   7 118.653 172.095  32
   1  12   8 1831.74 286.383  36
  -1 -12  -8 1427.05 329.125   7
   1  12   9 945.687 225.349  36
  -1 -12  -9 608.589 147.481  29
   1  12  10 160.797 130.280  36
  -1 -12 -10 365.444 234.643  34
  -1 -12 -10 191.924 120.186  25
  -1 -12 -10 394.743 245.526   7
  -1 -12 -10 180.120 120.598  29
  -1 -12 -10 340.837 149.018   9
  -1 -12 -11 346.055 169.640   9
   1  12  11 337.978 149.025   8
  -1 -12 -11 443.145 129.098  25
   1  12  11 163.020 156.952  36
  -1 -12 -11-3.43879 178.212  34
  -1 -12 -11 161.746 123.934  29
  -1 -12 -12 440.816 180.586   9
  -1 -12 -12 723.292 311.925  34
   1  12  12 393.810 170.354   8
  -1 -12 -12 934.415 200.454  29
  -1 -12 -12 831.351 157.962  25
  -1 -12 -13 774.796 152.714  29
  -1 -12 -13 1072.10 178.974  25
   1  12  13 815.075 216.804   8
  -1 -12 -13 964.669 191.650   9
  -1 -12 -13 786.175 347.696  34
  -1 -12 -14 3748.94 273.508  25
  -1 -12 -14 3759.91 309.329  29
  -1 -12 -14 3178.79 322.906   9
  -1 -12 -15 395.357 162.188  29
  -1 -12 -15 209.167 132.785  25
  -1 -12 -15 65.4048 145.232   9
  -1 -12 -16 96.3276 122.656  25
  -1 -12 -16 32.5102 169.777   9
  -1 -12 -16 138.772 146.921  29
  -1 -12 -17 440.274 163.001  29
  -1 -12 -17 597.768 188.327   9
  -1 -12 -17 637.995 168.734  25
  -1 -12 -18 4105.20 325.437  29
  -1 -12 -18 3653.84 302.428  25
  -1 -12 -19 2533.32 265.787  25
  -1 -12 -19 2192.92 273.387   9
  -1 -12 -19 2812.88 267.999  29
  -1 -12 -20 700.258 163.703  29
  -1 -12 -20 811.445 171.764  25
  -1 -12 -20 887.649 184.518   9
  -1 -12 -21-6.32485 109.058  29
  -1 -12 -21 98.7926 106.690  25
  -1 -12 -21 89.1092 140.432  26
  -1 -12 -22-16.4203 94.4016  29
  -1 -12 -22-27.4813 91.7292  25
  -1 -12 -22 81.8395 127.406  26
  -1 -12 -23 303.497 95.6217  29
  -1 -12 -23 109.254 114.054  26
  -1 -12 -24-17.7033 108.238  26
  -1 -12 -24-57.2614 64.7742  29
  -1 -12 -25 116.251 83.6326  26
  -1 -13  16-80.6200 75.4926  20
  -1 -13  15 304.587 116.630  14
  -1 -13  15-2.24578 96.8129  20
  -1 -13  15 166.645 66.2405  17
  -1 -13  14 49.9556 85.9761  17
  -1 -13  14 253.961 134.908  20
  -1 -13  14 178.464 121.271  14
  -1 -13  13 402.839 147.335  20
  -1 -13  13 281.918 110.924  17
  -1 -13  13 422.887 136.426  14
  -1 -13  12 509.601 169.770  14
  -1 -13  12 42.8469 131.413  20
  -1 -13  12 278.481 131.166  17
  -1 -13  11 115.098 148.944  20
  -1 -13  11 422.561 164.960  17
  -1 -13  11 325.459 142.941  14
  -1 -13  10 204.500 135.955  17
  -1 -13  10 138.364 149.544  20
  -1 -13  10 251.663 165.299  14
  -1 -13   9 1175.24 265.961  20
  -1 -13   9 1615.10 252.886  14
  -1 -13   9 1008.84 198.528  17
  -1 -13   8 1874.46 256.992  17
  -1 -13   8 2055.89 300.488  20
  -1 -13   8 2397.96 298.005  14
  -1 -13   7 1048.56 250.335  20
  -1 -13   7 1136.74 231.500  14
  -1 -13   7 861.042 189.416  17
  -1 -13   6 460.165 181.800  20
  -1 -13   6 632.286 185.533  14
  -1 -13   6 355.399 162.472  17
  -1 -13   5 356.461 179.907  14
  -1 -13   5 129.657 165.976  20
  -1 -13   5-8.67012 154.318  17
  -1 -13   4-63.2845 159.788  14
  -1 -13   4 135.988 163.962  20
  -1 -13   4-13.1869 136.966  17
  -1 -13   3 454.390 167.219  20
  -1 -13   3 633.127 191.927  14
  -1 -13   3 623.919 191.077  17
   1  13  -3 489.733 280.564   1
  -1 -13   2 261.374 128.078  17
  -1 -13   2 284.023 186.371  14
   1  13  -2-1.41917 225.500   1
  -1 -13   1 782.211 193.345  14
   1  13  -1 324.696 208.822   1
  -1 -13   1 367.233 156.259  17
   1  13   0 3153.68 426.893   1
  -1 -13   0 2596.45 284.388  14
  -1 -13   0 2154.67 267.642  17
  -1 -13   0 2603.61 328.748   3
  -1 -13  -1 3612.73 325.941  14
  -1 -13  -1 3850.66 386.885   3
  -1 -13  -1 3066.49 289.110  17
   1  13   2 3268.19 453.406  36
  -1 -13  -2 3009.95 233.421  29
  -1 -13  -2 3475.69 458.319   7
  -1 -13  -2 3115.10 292.450  17
   1  13   3 8455.30 709.959  36
  -1 -13  -3 7842.84 443.152  17
  -1 -13  -3 8238.54 723.163   7
  -1 -13  -3 7788.78 394.455  29
   1  13   4 818.464 263.366  36
  -1 -13  -4 1046.17 188.177  17
  -1 -13  -4 1004.07 142.815  29
  -1 -13  -4 1068.16 285.656   7
   1  13   5 8.84910 162.596  36
  -1 -13  -5-210.692 164.501   7
  -1 -13  -5 255.131 143.482  29
  -1 -13  -5 53.0886 120.838  17
  -1 -13  -6 859.454 149.346  29
  -1 -13  -6 936.496 260.855   7
  -1 -13  -6 799.163 167.935  17
   1  13   6 989.096 225.487  32
   1  13   6 1074.73 276.199  36
  -1 -13  -7 61.9009 185.803   7
  -1 -13  -7 99.5347 142.588   9
   1  13   7 135.088 155.712  36
  -1 -13  -7 67.0704 116.548  25
   1  13   7-102.338 137.250  32
  -1 -13  -7 51.1096 115.528  29
  -1 -13  -7-152.710 118.050  17
  -1 -13  -8 62.6525 114.565  25
  -1 -13  -8 137.932 134.064   9
   1  13   8-157.833 151.345  32
   1  13   8 106.726 169.757  36
  -1 -13  -8 167.422 131.467  29
  -1 -13  -8-365.882 236.077   7
  -1 -13  -9 335.556 238.346   7
  -1 -13  -9 264.850 167.886   9
   1  13   9-72.6134 146.732  32
  -1 -13  -9-28.7428 146.892  29
   1  13   9-251.838 203.377  36
  -1 -13  -9 218.847 122.488  25
   1  13  10 65.4388 149.066  32
  -1 -13 -10 29.5516 207.488   7
   1  13  10-131.188 177.309  36
  -1 -13 -10 122.886 154.524   9
  -1 -13 -10-50.5898 126.350  25
   1  13  10-239.315 198.381   8
  -1 -13 -10 107.906 131.885  29
  -1 -13 -11 273.220 129.355  25
  -1 -13 -11 434.293 148.329   9
  -1 -13 -11 89.3007 136.954  26
  -1 -13 -11 418.078 162.159  29
  -1 -13 -12 249.560 171.325   9
  -1 -13 -12 264.063 131.472  29
  -1 -13 -12 68.0244 135.406  26
  -1 -13 -12 234.433 119.738  25
  -1 -13 -13 805.649 153.638  25
  -1 -13 -13 753.642 197.681  29
  -1 -13 -13 764.194 194.717  26
  -1 -13 -13 899.151 230.812   9
  -1 -13 -14 1337.04 219.850  29
  -1 -13 -14 1220.87 243.625   9
  -1 -13 -14 1233.60 192.227  25
  -1 -13 -14 1264.77 233.130  26
  -1 -13 -15 5332.56 434.824   9
  -1 -13 -15 6221.43 390.776  29
  -1 -13 -15 6464.20 357.824  25
  -1 -13 -16 868.571 177.621  25
  -1 -13 -16 467.777 186.762   9
  -1 -13 -16 893.915 196.540  29
  -1 -13 -16 575.261 173.390  26
  -1 -13 -17 994.766 190.089  29
  -1 -13 -17 1134.61 238.116   9
  -1 -13 -17 870.062 197.243  26
  -1 -13 -17 857.454 170.576  25
  -1 -13 -18 440.019 176.516   9
  -1 -13 -18 666.453 180.647  26
  -1 -13 -18 762.043 174.573  25
  -1 -13 -18 948.054 190.145  29
  -1 -13 -19 365.415 153.876  29
  -1 -13 -19 579.968 144.898  25
  -1 -13 -19 164.097 145.630  26
  -1 -13 -19 438.540 175.208   9
  -1 -13 -20 274.036 136.463   9
  -1 -13 -20 454.937 136.246  25
  -1 -13 -20 604.702 154.950  29
  -1 -13 -20 448.549 169.881  26
  -1 -13 -21 1192.35 172.293  29
  -1 -13 -21 981.527 185.517  26
  -1 -13 -21 1029.40 153.109  25
  -1 -13 -22 667.600 156.600  26
  -1 -13 -22 591.867 126.590  29
  -1 -13 -23 271.070 88.2933  29
  -1 -13 -23 237.810 118.870  26
  -1 -13 -24 83.3414 52.6646  29
  -1 -13 -24 159.862 90.6029  26
  -1 -14  14 540.684 110.153  14
  -1 -14  14 477.635 107.290  20
  -1 -14  14 177.663 68.5546  17
  -1 -14  13-141.722 90.8759  17
  -1 -14  13-107.916 102.661  14
  -1 -14  13-4.22941 96.7815  20
  -1 -14  12 196.553 116.562  20
  -1 -14  12 57.1367 86.6163  17
  -1 -14  12 224.126 120.243  14
  -1 -14  11 179.795 112.043  17
  -1 -14  11 60.4463 119.434  20
  -1 -14  11 473.261 175.024  14
  -1 -14  10-102.289 131.986  20
  -1 -14  10-4.65669 106.075  17
  -1 -14  10-21.3956 131.533  14
  -1 -14   9 205.846 123.635  17
  -1 -14   9-39.1590 139.038  20
  -1 -14   9 95.1888 137.729  14
  -1 -14   8 2021.59 254.730  17
  -1 -14   8 2491.56 283.351  14
  -1 -14   8 1936.49 272.977  20
  -1 -14   7 664.947 196.398  14
  -1 -14   7 610.231 176.837  17
  -1 -14   7 849.624 216.107  20
  -1 -14   6 32.5500 159.525  20
  -1 -14   6 313.283 138.475  17
  -1 -14   6 412.928 189.946  14
  -1 -14   5-76.2410 158.184  17
  -1 -14   5 90.4138 155.036  20
  -1 -14   5-155.212 175.600  14
  -1 -14   4 313.651 169.100  20
  -1 -14   4-32.7532 155.011  14
  -1 -14   4 172.406 171.591  17
  -1 -14   3 9.08967 147.365  17
  -1 -14   3 464.802 196.519  14
  -1 -14   2 247.775 158.436  14
  -1 -14   2 153.764 137.683  17
  -1 -14   1 2738.97 302.925  17
  -1 -14   1 2735.63 294.635  14
  -1 -14   0 4796.58 384.139  17
  -1 -14   0 5101.90 372.546  14
  -1 -14  -1 495.628 172.225  17
  -1 -14  -1 323.146 111.860  29
  -1 -14  -1 271.231 141.027  14
   1  14   2 3488.19 437.634   1
  -1 -14  -2 3450.62 310.728  14
  -1 -14  -2 3598.73 262.974  29
  -1 -14  -2 3303.28 311.202  17
  -1 -14  -2 3439.25 483.993   7
   1  14   3 697.514 254.292  36
  -1 -14  -3 347.933 138.774  17
  -1 -14  -3 456.124 154.116  29
  -1 -14  -3 536.240 240.663   7
   1  14   4 269.736 190.774  36
  -1 -14  -4 140.613 132.215  17
  -1 -14  -4 185.649 137.194  29
  -1 -14  -4-101.645 186.328   7
   1  14   5 4327.01 472.614  36
  -1 -14  -5 5001.51 582.969   7
  -1 -14  -5 4074.99 329.246  17
  -1 -14  -5 4084.95 291.059  29
  -1 -14  -6 14715.1 588.018  29
  -1 -14  -6 15476.1 635.206  17
  -1 -14  -6 15828.7 1059.61   7
  -1 -14  -6 14597.5 571.902  25
  -1 -14  -7 10418.3 494.870  17
  -1 -14  -7 9541.76 468.711  29
  -1 -14  -7 8850.29 436.667  25
  -1 -14  -7 10176.7 520.995   9
  -1 -14  -8 8336.80 429.901  17
  -1 -14  -8 8171.78 437.249  29
  -1 -14  -8 8313.25 476.618   9
  -1 -14  -8 7839.34 400.890  25
  -1 -14  -9 3438.62 339.037   9
  -1 -14  -9 3446.74 275.745  25
  -1 -14  -9 3157.97 279.643  29
  -1 -14 -10 3131.56 282.063  29
  -1 -14 -10 3486.42 272.103  25
  -1 -14 -10 2839.40 301.633   9
  -1 -14 -11 2695.64 266.043  29
  -1 -14 -11 2344.19 295.778   9
  -1 -14 -11 2381.00 231.054  25
  -1 -14 -12 500.949 145.531  26
  -1 -14 -12 403.336 170.829   9
  -1 -14 -12 636.409 176.604  29
  -1 -14 -12 537.855 157.596  25
  -1 -14 -13 145.755 148.443  26
  -1 -14 -13 756.897 181.957  29
  -1 -14 -13 497.817 185.875   9
  -1 -14 -13 659.562 142.667  25
  -1 -14 -14 602.617 189.431  29
  -1 -14 -14 426.249 161.669  26
  -1 -14 -14 204.309 164.424   9
  -1 -14 -14 243.832 130.124  25
  -1 -14 -15 177.752 177.604   9
  -1 -14 -15 15.9548 120.185  25
  -1 -14 -15 192.466 147.259  29
  -1 -14 -15-22.8596 132.455  26
  -1 -14 -16-7.73781 146.009   9
  -1 -14 -16 31.7131 118.255  25
  -1 -14 -16 29.8448 130.137  29
  -1 -14 -16 109.758 185.249  26
  -1 -14 -17 594.250 171.753  26
  -1 -14 -17 759.479 175.635  29
  -1 -14 -17 492.969 146.570  25
  -1 -14 -17 683.009 201.050   9
  -1 -14 -18 754.118 172.435  29
  -1 -14 -18 506.538 151.579  26
  -1 -14 -18 795.375 196.264   9
  -1 -14 -18 777.925 167.076  25
  -1 -14 -19 687.252 141.238  25
  -1 -14 -19 711.643 181.161   9
  -1 -14 -19 770.329 181.514  26
  -1 -14 -19 952.563 177.747  29
  -1 -14 -20 184.742 98.6226  25
  -1 -14 -20 416.566 139.388  29
  -1 -14 -20 192.496 119.762  26
  -1 -14 -21 114.338 79.4154  25
  -1 -14 -21 362.157 118.212  29
  -1 -14 -22 448.216 106.370  29
  -1 -14 -22 462.347 132.443  26
  -1 -14 -23 103.136 68.0048  29
  -1 -14 -23-10.6388 83.1550  26
  -1 -15  13 906.224 101.174  17
  -1 -15  13 691.306 101.702  20
  -1 -15  12 224.213 85.3426  17
  -1 -15  12 365.528 96.4779  20
  -1 -15  12 319.958 109.446  14
  -1 -15  11-41.6524 112.472  14
  -1 -15  11 140.768 100.224  20
  -1 -15  11-25.2105 84.5520  17
  -1 -15  10-5.72296 95.6297  17
  -1 -15  10-29.2151 106.247  20
  -1 -15  10-125.044 118.108  14
  -1 -15   9 1429.00 186.101  17
  -1 -15   9 1638.37 233.665  14
  -1 -15   9 1513.56 213.259  20
  -1 -15   8 1496.88 213.916  20
  -1 -15   8 1831.50 221.482  17
  -1 -15   8 2230.23 255.011  14
  -1 -15   7 314.041 160.376  20
  -1 -15   7 23.3498 132.706  14
  -1 -15   7-0.77920 127.701  17
  -1 -15   6 1452.75 243.731  20
  -1 -15   6 1423.52 236.200  14
  -1 -15   6 1053.16 191.441  17
  -1 -15   5 1355.45 227.337  20
  -1 -15   5 1036.20 193.717  14
  -1 -15   5 1106.40 200.925  17
  -1 -15   4 1048.81 216.847  14
  -1 -15   4 836.192 201.015  17
  -1 -15   3 1818.67 242.949  14
  -1 -15   3 1659.88 262.568  17
  -1 -15   2 597.301 172.754  14
  -1 -15   2 650.342 186.723  17
  -1 -15   1 179.597 136.717  14
  -1 -15   1 6.94026 144.907  17
  -1 -15   0 221.809 158.381  17
  -1 -15   0 254.286 157.476  14
  -1 -15  -1 323.665 149.198  17
  -1 -15  -1 352.050 140.292  14
  -1 -15  -2-66.3099 140.291  14
  -1 -15  -2 130.568 104.529  29
  -1 -15  -2 13.4592 144.558  17
  -1 -15  -3 303.564 157.336  17
  -1 -15  -3 162.049 134.560  29
  -1 -15  -4 943.313 200.975  17
  -1 -15  -4 1078.80 175.241  29
  -1 -15  -5 2710.68 262.341  29
  -1 -15  -5 2063.09 245.897  17
  -1 -15  -6 788.218 162.270  25
  -1 -15  -6 944.060 178.096  29
  -1 -15  -6 915.008 197.738  17
  -1 -15  -7 520.022 157.566  29
  -1 -15  -7 344.685 114.145  25
  -1 -15  -7 523.833 149.604   9
  -1 -15  -7 300.011 154.896  17
  -1 -15  -8 520.034 155.439   9
  -1 -15  -8 748.980 143.814  25
  -1 -15  -8 887.491 181.565  17
  -1 -15  -8 720.919 188.650  29
  -1 -15  -9 45.7778 145.767   9
  -1 -15  -9 138.067 133.335  29
  -1 -15  -9 58.0601 112.143  25
  -1 -15 -10 235.518 131.468  29
  -1 -15 -10 60.9646 114.301  25
  -1 -15 -10 114.626 135.839   9
  -1 -15 -11 176.077 115.338  25
  -1 -15 -11-106.756 139.052   9
  -1 -15 -11 141.674 134.984  29
  -1 -15 -12 1500.72 183.142  25
  -1 -15 -12 1672.19 225.685  29
  -1 -15 -12 1459.86 248.828   9
  -1 -15 -13 4.51382 151.461   9
  -1 -15 -13-48.8378 139.303  29
  -1 -15 -13 25.5506 105.536  25
  -1 -15 -13 78.1313 122.647  26
  -1 -15 -14 1470.60 248.751   9
  -1 -15 -14 1975.57 201.926  25
  -1 -15 -14 2218.01 247.795  29
  -1 -15 -14 1326.84 201.386  26
  -1 -15 -15 602.203 166.376  29
  -1 -15 -15 357.841 189.025   9
  -1 -15 -15 483.615 141.370  25
  -1 -15 -15 257.455 117.856  26
  -1 -15 -16 38.6066 113.493  25
  -1 -15 -16 90.9173 143.997  29
  -1 -15 -16-259.926 153.333  26
  -1 -15 -16 203.687 159.706   9
  -1 -15 -17-9.70086 131.013  29
  -1 -15 -17 81.3641 104.925  25
  -1 -15 -17-163.272 139.835  26
  -1 -15 -17-73.9490 150.867   9
  -1 -15 -18 798.201 189.577   9
  -1 -15 -18 367.133 126.466  25
  -1 -15 -18 347.806 149.895  26
  -1 -15 -18 530.109 140.270  29
  -1 -15 -19 767.680 156.413  29
  -1 -15 -19 742.513 166.163  26
  -1 -15 -19 834.307 130.814  25
  -1 -15 -20 238.185 113.446  29
  -1 -15 -20-14.2391 102.546  26
  -1 -15 -20 83.4143 77.8536  25
  -1 -15 -21-53.0161 80.6316  29
  -1 -15 -21-122.549 67.3078  25
  -1 -15 -21-61.2884 94.3265  26
  -1 -15 -22 174.048 75.3766  29
  -1 -15 -22 180.651 87.6709  26
  -1 -16  11 275.332 78.7421  17
  -1 -16  11 388.296 109.014  14
  -1 -16  10 416.037 99.4128  20
  -1 -16  10 388.949 121.183  14
  -1 -16  10 480.009 104.444  17
  -1 -16   9 133.211 96.4206  17
  -1 -16   9 290.504 99.8350  20
  -1 -16   8 160.269 113.605  14
  -1 -16   8-10.0366 99.6925  17
  -1 -16   8 175.414 104.192  20
  -1 -16   7 262.372 131.113  14
  -1 -16   7 488.962 143.110  17
  -1 -16   6 25.3890 121.946  14
  -1 -16   6-113.534 119.716  17
  -1 -16   5 962.363 192.891  17
  -1 -16   5 1124.28 220.658  14
  -1 -16   4 820.061 170.346  14
  -1 -16   4 1093.25 220.422  17
  -1 -16   3-135.162 150.816  17
  -1 -16   3 182.508 143.490  14
  -1 -16   2 3009.51 280.862  14
  -1 -16   2 3009.74 304.149  17
  -1 -16   1 4588.59 345.915  14
  -1 -16   1 3788.91 335.708  17
  -1 -16   0 1855.77 241.007  14
  -1 -16   0 1861.08 255.575  17
  -1 -16  -1 872.718 192.288  17
  -1 -16  -1 981.119 207.377  14
  -1 -16  -2 152.578 152.849  17
  -1 -16  -3 552.499 149.424  29
  -1 -16  -3 789.315 187.572  17
  -1 -16  -4 160.421 124.120  17
  -1 -16  -4-30.2326 110.133  29
  -1 -16  -5 276.185 139.359  29
  -1 -16  -5 320.701 141.733  17
  -1 -16  -5 228.991 136.863  25
  -1 -16  -6 160.569 131.431  17
  -1 -16  -6 287.333 142.754  25
  -1 -16  -6-56.9796 136.338  29
  -1 -16  -7 717.108 163.983  17
  -1 -16  -7 886.953 145.937  29
  -1 -16  -7 1219.36 188.458  25
  -1 -16  -8 1039.02 166.239  25
  -1 -16  -8 1090.21 182.596  29
  -1 -16  -8 907.531 157.052  17
  -1 -16  -8 1063.03 188.899   9
  -1 -16  -9 884.351 177.583  29
  -1 -16  -9 966.795 183.636   9
  -1 -16  -9 839.172 155.316  25
  -1 -16 -10 1577.73 235.882   9
  -1 -16 -10 992.944 167.771  25
  -1 -16 -10 1493.97 202.676  29
  -1 -16 -11 4172.21 277.033  25
  -1 -16 -11 3770.21 309.505  29
  -1 -16 -11 3923.44 338.873   9
  -1 -16 -12 5452.42 357.407  29
  -1 -16 -12 4997.52 382.306   9
  -1 -16 -12 5407.38 306.431  25
  -1 -16 -13 3370.55 237.248  25
  -1 -16 -13 3260.22 280.313  29
  -1 -16 -13 3347.59 318.421   9
  -1 -16 -14 797.572 162.686  29
  -1 -16 -14 1149.91 218.903   9
  -1 -16 -14 903.351 143.374  25
  -1 -16 -15 1621.37 214.269  29
  -1 -16 -15 1758.64 183.485  25
  -1 -16 -15 1128.04 207.835   9
  -1 -16 -15 1098.62 170.980  26
  -1 -16 -16 309.103 145.836   9
  -1 -16 -16 254.001 110.027  26
  -1 -16 -16 103.469 123.831  29
  -1 -16 -16 113.150 92.4206  25
  -1 -16 -17 164.097 122.300   9
  -1 -16 -17-8.26208 100.140  25
  -1 -16 -17-144.717 100.124  26
  -1 -16 -17 94.2949 120.649  29
  -1 -16 -18 616.368 132.885  29
  -1 -16 -18 525.633 131.196  26
  -1 -16 -18 495.613 108.620  25
  -1 -16 -19 463.258 121.929  29
  -1 -16 -19 197.525 78.1049  25
  -1 -16 -19 270.190 107.182  26
  -1 -16 -20 69.1311 81.9809  26
  -1 -16 -20 190.947 90.4393  29
  -1 -16 -21 445.397 88.1810  29
  -1 -16 -21 277.703 78.1598  26
  -1 -17   9 964.790 135.379  14
  -1 -17   9 956.902 118.494  17
  -1 -17   8 956.490 132.751  17
  -1 -17   8 1137.01 145.167  14
  -1 -17   7 571.612 136.080  14
  -1 -17   7 559.701 121.906  17
  -1 -17   6 509.903 130.777  17
  -1 -17   6 406.079 129.984  14
  -1 -17   5 168.995 110.421  17
  -1 -17   5 62.4785 109.683  14
  -1 -17   4 514.395 159.884  17
  -1 -17   4 382.161 142.378  14
  -1 -17   3 201.140 119.814  14
  -1 -17   3 375.204 151.457  17
  -1 -17   2 739.338 182.071  17
  -1 -17   2 341.889 126.620  14
  -1 -17   1 3718.66 309.419  17
  -1 -17   1 3458.20 277.335  14
  -1 -17   0 1102.02 208.388  17
  -1 -17   0 1222.65 198.876  14
  -1 -17  -1 115.924 138.715  17
  -1 -17  -1 143.956 104.531  14
  -1 -17  -2 1127.73 205.035  17
  -1 -17  -3 287.739 145.505  17
  -1 -17  -3 57.8596 109.421  25
  -1 -17  -4 240.848 126.563  17
  -1 -17  -4 31.6046 119.479  25
  -1 -17  -5 109.745 121.883  17
  -1 -17  -5 101.539 111.889  25
  -1 -17  -5 187.882 102.419  29
  -1 -17  -6 789.855 159.777  17
  -1 -17  -6 524.510 132.679  25
  -1 -17  -6 544.666 125.762  29
  -1 -17  -7 2983.89 247.223  29
  -1 -17  -7 2767.38 234.318  25
  -1 -17  -7 2582.57 237.936  17
  -1 -17  -8 1209.70 171.759  17
  -1 -17  -8 1003.36 165.730  29
  -1 -17  -8 795.582 149.660  25
  -1 -17  -9 1058.75 185.109   9
  -1 -17  -9 938.264 171.360  29
  -1 -17  -9 915.141 150.082  25
  -1 -17 -10 1524.43 206.439   9
  -1 -17 -10 1918.97 220.038  29
  -1 -17 -10 1719.63 192.535  25
  -1 -17 -11 2090.51 214.571  29
  -1 -17 -11 1821.51 226.989   9
  -1 -17 -11 1797.79 177.990  25
  -1 -17 -12 5591.85 336.858  29
  -1 -17 -12 4870.98 355.051   9
  -1 -17 -12 5090.43 280.707  25
  -1 -17 -13 5736.03 338.351  29
  -1 -17 -13 5748.11 288.866  25
  -1 -17 -13 5733.36 372.272   9
  -1 -17 -14 3044.60 273.133   9
  -1 -17 -14 3207.87 252.004  29
  -1 -17 -14 2724.74 202.265  25
  -1 -17 -15 1433.39 162.109  25
  -1 -17 -15 1338.29 178.475  29
  -1 -17 -16 1828.52 199.582  29
  -1 -17 -16 1658.48 159.693  25
  -1 -17 -17 2133.15 191.585  29
  -1 -17 -17 1725.22 148.676  25
  -1 -17 -18-48.2151 89.2546  29
  -1 -17 -18-81.7651 63.9832  25
  -1 -17 -19 183.405 92.1337  29
  -1 -18   7 258.068 77.1975  17
  -1 -18   7 341.388 85.1812  14
  -1 -18   6-39.6662 86.2348  14
  -1 -18   6-65.2431 76.1381  17
  -1 -18   5 139.617 88.6512  14
  -1 -18   5 79.1633 79.3057  17
  -1 -18   4 186.641 105.611  17
  -1 -18   4 236.061 109.632  14
  -1 -18   3 472.311 127.705  14
  -1 -18   3 104.900 109.336  17
  -1 -18   2 183.726 118.918  17
  -1 -18   2 82.4420 110.082  14
  -1 -18   1 370.143 121.463  17
  -1 -18   1 827.483 144.918  14
  -1 -18   0 11.2284 95.9989  14
  -1 -18   0-22.8424 95.5648  25
  -1 -18  -1 104.068 106.808  25
  -1 -18  -1-49.0093 101.681  17
  -1 -18  -2-23.8594 93.7407  25
  -1 -18  -2-23.4528 110.338  17
  -1 -18  -3 267.314 124.453  17
  -1 -18  -3 266.365 122.450  25
  -1 -18  -4 294.866 105.487  25
  -1 -18  -4 329.752 129.507  17
  -1 -18  -5 1740.48 167.336  29
  -1 -18  -5 1311.96 170.719  25
  -1 -18  -5 1315.48 181.943  17
  -1 -18  -6 4115.20 275.086  17
  -1 -18  -6 4347.51 259.320  29
  -1 -18  -6 3783.66 257.789  25
  -1 -18  -7 1260.94 165.760  25
  -1 -18  -7 1461.87 168.786  17
  -1 -18  -7 1414.19 164.427  29
  -1 -18  -8 35.9472 99.1491  29
  -1 -18  -8 88.7994 96.0318  25
  -1 -18  -9-298.071 110.011  29
  -1 -18  -9 66.9347 96.1606  25
  -1 -18 -10 166.386 106.075  29
  -1 -18 -10 277.154 97.4109  25
  -1 -18 -11 260.807 96.1094  25
  -1 -18 -11 134.711 103.093  29
  -1 -18 -12 774.604 138.767  29
  -1 -18 -12 445.558 99.7827  25
  -1 -18 -13 2861.61 218.544  29
  -1 -18 -13 2612.89 172.581  25
  -1 -18 -14 3866.87 198.919  25
  -1 -18 -14 4350.84 260.225  29
  -1 -18 -15 1366.52 125.091  25
  -1 -18 -15 1564.14 162.861  29
  -1 -18 -16-60.7867 85.7913  29
  -1 -18 -17 659.820 107.319  29
  -1 -19   4 258.614 73.4852  17
  -1 -19   4 243.198 72.4069  14
  -1 -19   4 228.876 60.2740  25
  -1 -19   3 730.688 97.3777  14
  -1 -19   3 775.329 112.197  17
  -1 -19   3 457.048 80.2897  25
  -1 -19   2 255.194 75.7053  14
  -1 -19   2 331.581 100.383  17
  -1 -19   2 327.118 87.3092  25
  -1 -19   1 325.447 90.9133  14
  -1 -19   1 184.657 75.9027  25
  -1 -19   0 1256.85 137.801  25
  -1 -19   0 1530.33 167.986  17
  -1 -19  -1 1044.01 143.643  17
  -1 -19  -1 929.243 122.025  25
  -1 -19  -2-0.63912 94.4463  17
  -1 -19  -2-20.7173 74.1213  25
  -1 -19  -3 120.836 94.7232  17
  -1 -19  -3 38.0342 80.4611  25
  -1 -19  -4 7.18371 79.6185  25
  -1 -19  -4 11.9719 88.0979  17
  -1 -19  -5 275.072 103.213  17
  -1 -19  -5 312.118 92.1532  25
  -1 -19  -6 3692.50 214.025  25
  -1 -19  -7 4406.35 224.873  29
  -1 -19  -7 4049.93 223.568  25
  -1 -19  -8 952.253 121.825  25
  -1 -19  -8 941.494 127.431  29
  -1 -19  -9 698.341 99.7108  25
  -1 -19  -9 753.028 111.916  29
  -1 -19 -10 1577.02 152.557  29
  -1 -19 -10 1414.38 125.325  25
  -1 -19 -11 693.203 114.814  29
  -1 -19 -11 622.197 92.3802  25
  -1 -19 -12 887.518 128.719  29
  -1 -19 -12 811.291 93.4411  25
  -1 -19 -13 1248.89 137.566  29
  -1 -19 -13 1063.29 92.7206  25
  -1 -19 -14 380.974 90.5157  29
  -1 -19 -15 195.893 78.8304  29
  -1 -20  -1 16.1328 45.1694  25
  -1 -20  -1 40.7419 68.6636  17
  -1 -20  -2 415.601 83.2924  17
  -1 -20  -2 218.081 59.6104  25
  -1 -20  -3 267.914 62.2940  25
  -1 -20  -4 805.498 89.0453  25
  -1 -20  -5 880.757 89.8784  25
  -1 -20  -6 1262.99 102.571  25
  -1 -20  -7 347.460 69.9894  25
  -1 -20  -8 1669.67 101.223  25
   2 -18 -14-99.8053 63.0717  23
   2 -18 -14-51.6686 58.5671  29
   2 -18 -13 48.0522 57.3284  29
   2 -18 -13 51.8649 60.8788  23
   2 -18 -12 225.654 72.0618  23
   2 -18 -12 147.161 64.1238  29
   2 -18 -11 454.567 84.0391  29
   2 -18 -11 396.693 73.7997  23
   2 -18   0 153.770 74.3467  17
   2 -18   1 147.131 78.1749  17
   2 -18   1-26.4075 79.7375  14
   2 -18   2 538.081 108.985  17
   2 -18   2 675.029 108.049  14
   2 -18   3 694.171 118.739  17
   2 -18   3 786.186 114.465  14
   2 -18   4 1095.86 127.891  17
   2 -18   4 1033.54 126.470  14
   2 -18   5 2734.83 173.059  17
   2 -18   5 3459.60 194.507  14
   2 -17 -16 127.862 78.1225  23
   2 -17 -16 229.783 74.2536  26
   2 -17 -16 127.683 68.0489  29
   2 -17 -15 244.449 80.4297  26
   2 -17 -15 318.901 86.4202  23
   2 -17 -15 415.416 95.7776  29
   2 -17 -14 764.093 114.007  23
   2 -17 -14 748.757 117.414  26
   2 -17 -14 949.349 123.223  29
   2 -17 -13 1454.56 151.846  23
   2 -17 -13 1521.23 142.820  26
   2 -17 -13 1678.21 160.461  29
   2 -17 -12 397.191 106.082  29
   2 -17 -11 1003.56 139.506  29
   2 -17 -10 651.889 106.395  23
   2 -17 -10 921.527 136.389  29
   2 -17  -9 537.328 111.345  23
   2 -17  -9 534.957 115.579  29
   2 -17  -1 306.400 125.288  17
   2 -17   0 450.355 124.491  14
   2 -17   0 377.764 110.557  17
   2 -17   1 531.575 130.053  17
   2 -17   1 691.760 130.351  14
   2 -17   2 1077.63 166.567  14
   2 -17   2 1070.91 165.923  17
   2 -17   3 76.7968 93.7576  17
   2 -17   3 159.055 103.671  14
   2 -17   4 127.044 122.048  17
   2 -17   4 383.835 132.121  14
   2 -17   5-109.550 99.0508  14
   2 -17   5-50.8172 93.9589  17
   2 -17   6 1687.82 170.707  17
   2 -17   6 1779.08 176.661  14
   2 -17   7 1723.26 159.525  17
   2 -17   7 2246.98 191.835  14
   2 -17   8 805.569 120.218  14
   2 -17   8 754.029 114.083  17
   2 -16 -18 199.827 82.0823  23
   2 -16 -18 190.809 83.3525  26
   2 -16 -18 115.145 69.6465  29
   2 -16 -17 223.584 89.2879  23
   2 -16 -17 278.715 102.384  29
   2 -16 -17 219.630 86.3968  26
   2 -16 -16 237.256 99.1781  26
   2 -16 -16 420.728 116.173  29
   2 -16 -15 404.204 122.685  26
   2 -16 -15 281.862 108.267  29
   2 -16 -14 36.4912 93.7261  26
   2 -16 -14 19.1257 110.412  29
   2 -16 -13 220.960 114.426  29
   2 -16 -13 232.327 100.227  26
   2 -16 -12 166.457 125.835  29
   2 -16 -12-10.3629 100.331  26
   2 -16 -11 186.542 136.699  26
   2 -16 -11 73.3875 117.856  29
   2 -16 -10 140.617 111.586  26
   2 -16 -10-86.0963 125.436  29
   2 -16  -9 23.4615 107.272  29
   2 -16  -8 1473.55 179.200  29
   2 -16  -7 2441.68 215.335  29
   2 -16  -2-124.789 117.685  17
   2 -16  -1 961.531 192.536  14
   2 -16  -1 1059.79 170.535  17
   2 -16   0 352.127 144.713  17
   2 -16   0 319.107 155.606  14
   2 -16   1-126.464 127.617  14
   2 -16   1 22.1019 120.912  17
   2 -16   2 137.753 122.356  17
   2 -16   2 140.392 141.633  14
   2 -16   3-77.7942 115.109  14
   2 -16   3 45.7290 128.926  17
   2 -16   4 569.988 154.596  14
   2 -16   4 611.740 174.138  17
   2 -16   5 145.229 166.025  17
   2 -16   5 238.845 130.110  14
   2 -16   6-147.935 126.974  14
   2 -16   6 244.727 127.304  17
   2 -16   7 78.8423 102.238  17
   2 -16   7 6.49121 106.828  14
   2 -16   8 76.1675 93.5074  17
   2 -16   8 264.923 117.594  14
   2 -16   9 128.155 90.1171  17
   2 -16   9-26.0988 93.7546  14
   2 -16  10 67.0469 73.9079  17
   2 -16  10 19.4990 82.7373  14
   2 -16  11 436.775 88.8049  17
   2 -16  11 496.082 107.389  14
   2 -15 -20 49.9920 68.3301  26
   2 -15 -20-59.2259 72.5029  29
   2 -15 -20 186.361 75.2853  23
   2 -15 -19 491.745 95.4109  23
   2 -15 -19 851.737 123.266  29
   2 -15 -19 632.571 123.175  26
   2 -15 -18 1409.58 173.965  26
   2 -15 -18 1648.83 163.630  29
   2 -15 -17 1138.59 175.242  26
   2 -15 -17 1235.77 161.134  29
   2 -15 -16 659.446 143.304  29
   2 -15 -16 289.556 124.816  26
   2 -15 -15 139.540 124.674  26
   2 -15 -15-10.7053 110.808  29
   2 -15 -14 1091.83 188.213  26
   2 -15 -14 1360.20 194.974  29
   2 -15 -13 190.269 122.132  29
   2 -15 -13 242.426 126.169  26
   2 -15 -12-215.947 145.007  29
   2 -15 -12 245.489 145.940  26
   2 -15 -11 1159.38 185.939  29
   2 -15 -11 979.137 182.430  26
   2 -15 -10 2140.52 243.828  26
   2 -15 -10 2362.72 231.455  29
   2 -15  -9 2793.07 251.013  29
   2 -15  -9 2434.87 261.070  26
   2 -15  -8 1633.27 203.005  29
   2 -15  -7 628.245 137.893  29
   2 -15  -2 120.067 125.774  17
   2 -15  -1 518.006 164.927  17
   2 -15  -1 47.8802 128.620  14
   2 -15   0 22.5299 108.567  17
   2 -15   0-125.334 164.926  14
   2 -15   1 145.644 135.834  14
   2 -15   1 292.586 137.109  17
   2 -15   2 1930.65 257.267  14
   2 -15   2 1907.54 240.540  17
   2 -15   3 1733.99 254.455  14
   2 -15   3 1584.44 237.638  17
   2 -15   4 1495.42 231.177  14
   2 -15   4 1442.70 235.179  17
   2 -15   5 2997.53 342.072  17
   2 -15   5 3440.72 314.183  14
   2 -15   6 82.7788 134.150  17
   2 -15   6 381.846 162.476  14
   2 -15   7 287.470 143.796  14
   2 -15   7 9.35584 118.839  17
   2 -15   8 644.632 147.530  17
   2 -15   8 864.280 177.304  14
   2 -15   9 2836.37 263.463  14
   2 -15   9 2452.83 233.721  17
   2 -15  10 4288.19 297.059  14
   2 -15  10 3587.48 267.395  17
   2 -15  11 1584.30 175.297  17
   2 -15  11 2290.95 220.137  14
   2 -15  12 552.987 106.742  17
   2 -15  12 767.649 141.425  14
   2 -15  13 52.8546 59.8665  17
   2 -15  13 29.4098 72.6273  14
   2 -14 -21-58.0536 61.7026  23
   2 -14 -21 100.348 72.2977  29
   2 -14 -21 62.6394 79.8645  26
   2 -14 -20 1486.95 142.984  23
   2 -14 -20 1169.93 153.748  26
   2 -14 -20 1646.37 157.851  29
   2 -14 -19 7044.59 382.422  26
   2 -14 -19 8498.15 357.098  29
   2 -14 -18 2323.29 248.625  26
   2 -14 -18 3347.99 248.379  29
   2 -14 -17 288.265 131.724  29
   2 -14 -17 238.002 142.576  26
   2 -14 -16 611.606 167.712  29
   2 -14 -16 298.316 143.446  26
   2 -14 -15 689.661 171.686  26
   2 -14 -15 1138.69 199.846  29
   2 -14 -14 1719.11 232.646  29
   2 -14 -14 1073.31 225.588  26
   2 -14 -13 268.768 131.858  29
   2 -14 -13 520.697 169.461  26
   2 -14 -12 1638.90 213.271  29
   2 -14 -12 1686.42 246.124  26
   2 -14 -11 1400.14 220.390  29
   2 -14 -11 1014.76 210.996  26
   2 -14 -10 1548.60 207.315  29
   2 -14 -10 1442.92 232.284  26
   2 -14  -9 1223.92 202.525  26
   2 -14  -9 1119.09 180.418  29
   2 -14  -8 276.810 133.361  29
   2 -14  -8 158.831 141.890  26
   2 -14  -7 124.698 119.107  26
   2 -14  -7 404.640 133.813  29
   2 -14  -6 1369.22 185.225  29
   2 -14  -2 184.450 126.758  14
   2 -14  -2 128.420 131.956  17
   2 -14  -1 446.741 167.816  17
   2 -14  -1 97.5044 138.052  14
   2 -14   0 588.732 178.452  14
   2 -14   0 526.870 175.283  17
   2 -14   1 815.129 178.753  17
   2 -14   1 948.834 209.375  14
   2 -14   1 808.100 167.943  11
   2 -14   2 231.021 124.898  17
   2 -14   2 255.234 130.972  11
   2 -14   2 283.469 188.717  14
   2 -14   3 60.9873 122.780  17
   2 -14   3 154.634 147.574  14
   2 -14   4 237.118 162.479  14
   2 -14   4 335.102 176.478  17
   2 -14   5 373.592 168.290  14
   2 -14   5 108.286 150.872  17
   2 -14   6 852.313 205.327  17
   2 -14   6 718.297 182.544  14
   2 -14   7 485.118 170.747  14
   2 -14   7 501.568 155.513  17
   2 -14   8 174.751 133.182  17
   2 -14   8-146.384 154.078  14
   2 -14   9 423.627 157.592  17
   2 -14   9 865.449 201.450  14
   2 -14  10 1132.29 185.523  17
   2 -14  10 950.024 172.286  14
   2 -14  11 4730.49 326.610  14
   2 -14  11 3364.21 277.096  17
   2 -14  12 469.352 121.109  17
   2 -14  12 575.814 157.084  14
   2 -14  13 545.949 118.667  17
   2 -14  13 577.219 138.334  14
   2 -14  14 1000.33 130.468  14
   2 -14  14 995.109 129.601  17
   2 -13 -22 98.0941 59.5910  23
   2 -13 -22 104.149 75.4720  29
   2 -13 -22 265.464 89.3903  26
   2 -13 -21-58.6912 91.8960  29
   2 -13 -21-190.991 110.090  26
   2 -13 -21-58.3859 71.8866  23
   2 -13 -20 11.2329 95.9455  23
   2 -13 -20-17.4956 118.592  26
   2 -13 -20 69.8490 97.4154  29
   2 -13 -19 240.559 135.448  26
   2 -13 -19-239.382 135.500  29
   2 -13 -18 20.8892 113.704  29
   2 -13 -18 106.113 135.274  26
   2 -13 -17-20.3409 147.240  26
   2 -13 -17-51.8807 126.312  29
   2 -13 -16 132.467 140.848  26
   2 -13 -16 270.042 149.564  29
   2 -13 -15 964.969 194.064  29
   2 -13 -15 277.851 155.322  26
   2 -13 -14 291.028 157.632  29
   2 -13 -14-20.8947 154.596  26
   2 -13 -13 435.715 164.653  29
   2 -13 -13 205.493 152.700  26
   2 -13 -12 3518.87 313.740  29
   2 -13 -12 3413.37 357.535   9
   2 -13 -12 2657.36 304.009  26
   2 -13 -11 3200.10 289.457  29
   2 -13 -11 3301.71 339.542   9
   2 -13 -11 2814.61 308.963  26
   2 -13 -10 1774.97 269.912   9
   2 -13 -10 1821.67 263.027  26
   2 -13 -10 1815.84 212.340  29
   2 -13  -9-153.429 159.779   9
   2 -13  -9-15.6939 122.633  29
   2 -13  -9-73.1404 167.399  26
   2 -13  -8-136.061 120.955  29
   2 -13  -8 131.468 155.971   9
   2 -13  -8 51.5446 125.667  26
   2 -13  -7 223.183 124.674  26
   2 -13  -7 87.7024 131.027   9
   2 -13  -7 200.572 118.453  29
   2 -13  -6 3922.59 285.779  29
   2 -13  -6 4311.64 342.548   9
   2 -13  -6 3360.20 291.769  26
   2 -13  -2 2940.86 287.113  17
   2 -13  -2 3006.52 292.088  14
   2 -13  -1 2252.14 521.656  35
   2 -13  -1 1962.99 244.746  17
   2 -13  -1 1921.73 248.157  14
   2 -13   0 4946.75 375.386  14
   2 -13   0 5236.95 380.489  17
   2 -13   0 6320.61 771.446  35
   2 -13   0 5288.05 359.425  11
   2 -13   1 950.458 193.568  17
   2 -13   1 756.068 168.077  11
   2 -13   1 844.760 198.133  14
   2 -13   2 1160.74 205.351  11
   2 -13   2 1060.14 193.327  14
   2 -13   2 964.168 184.035  17
   2 -13   3-141.008 139.478  11
   2 -13   3-28.3261 149.980  14
   2 -13   3 137.972 154.119  17
   2 -13   4 55.0538 145.983  14
   2 -13   4-130.882 139.784  17
   2 -13   4 133.730 136.449  11
   2 -13   5 465.511 179.816  14
   2 -13   5 588.085 173.606  17
   2 -13   6 705.367 210.529  17
   2 -13   6 993.160 236.137  14
   2 -13   7 916.926 201.098  17
   2 -13   7 1470.04 251.888  14
   2 -13   8 781.574 184.850  17
   2 -13   8 1378.14 243.043  14
   2 -13   9 308.022 200.067  14
   2 -13   9-11.1022 117.618  15
   2 -13   9 255.124 146.022  17
   2 -13  10 184.994 114.742  15
   2 -13  10-35.5048 150.888  14
   2 -13  10-101.182 121.698  17
   2 -13  11 173.504 145.342  17
   2 -13  11 248.244 106.612  15
   2 -13  11 125.508 108.704  20
   2 -13  11 60.3727 135.827  14
   2 -13  12 54.2445 103.320  17
   2 -13  12 407.516 161.615  14
   2 -13  12 269.012 117.418  15
   2 -13  12 61.9987 96.5990  20
   2 -13  13-30.2874 95.9973  15
   2 -13  13 105.874 129.991  14
   2 -13  13 59.7616 90.7776  20
   2 -13  13-55.9144 98.4975  17
   2 -13  14 461.996 130.019  20
   2 -13  14 446.481 116.409  17
   2 -13  15 145.226 87.2722  20
   2 -13  15 353.265 102.459  17
   2 -13  15 202.668 93.2310  14
   2 -13  16 242.644 78.9575  17
   2 -12 -23 1021.44 126.578  26
   2 -12 -22-63.9433 66.7959  23
   2 -12 -22-104.073 85.6248  29
   2 -12 -22-188.228 114.872  26
   2 -12 -21 179.043 104.334  29
   2 -12 -21 286.097 91.5380  23
   2 -12 -21 393.710 131.373  26
   2 -12 -20 1621.95 185.823  29
   2 -12 -20 1186.19 194.892  26
   2 -12 -19 6617.03 363.196  29
   2 -12 -19 5136.19 385.387  26
   2 -12 -18 8534.66 429.101  29
   2 -12 -18 7018.07 462.182  26
   2 -12 -17 5199.62 354.855  29
   2 -12 -17 3675.71 347.101  26
   2 -12 -16 3246.40 357.381  26
   2 -12 -16 4304.13 331.527  29
   2 -12 -15 816.333 194.590  29
   2 -12 -15 541.610 176.094  26
   2 -12 -14 242.388 150.128  29
   2 -12 -14 373.636 187.528   9
   2 -12 -14 476.775 194.304  26
   2 -12 -13 837.482 214.832  29
   2 -12 -13 525.858 198.959  26
   2 -12 -13 664.467 197.192   9
   2 -12 -12 515.131 168.585  29
   2 -12 -12 467.837 211.499   9
   2 -12 -12 468.702 168.522  26
   2 -12 -11 2869.88 323.940  26
   2 -12 -11 3464.16 361.007   9
   2 -12 -11 3209.50 296.809  29
   2 -12 -10 1103.56 180.620  29
   2 -12 -10 1184.66 231.893   9
   2 -12 -10 994.134 203.179  26
   2 -12  -9 1055.71 190.674  29
   2 -12  -9 1043.86 227.180   9
  -2  12   9 1259.41 282.342   8
   2 -12  -9 916.030 221.310  26
   2 -12  -8 42.1299 137.226  26
   2 -12  -8 91.1423 135.188  29
  -2  12   8 31.4237 152.094   8
   2 -12  -8 6.31795 136.187   9
   2 -12  -7-103.215 129.558   9
  -2  12   7 190.370 168.427   8
   2 -12  -7 107.650 145.992  26
   2 -12  -7 26.6298 112.537  29
   2 -12  -6-32.8900 127.559  26
   2 -12  -6-76.2032 107.748  29
   2 -12  -6 150.090 128.320   9
  -2  12   6-6.23886 152.178   8
  -2  12   5 1973.98 276.549   8
  -2  12   4 18685.2 790.167   8
  -2  12   3 2958.74 367.373  36
   2 -12  -3 3005.06 516.584   6
   2 -12  -2 351.737 327.647   6
  -2  12   2 350.137 138.349  36
  -2  12   2-4.19147 153.939   1
   2 -12  -2-156.550 212.928  35
  -2  12   1 914.019 203.278   1
   2 -12  -1 1134.97 374.168   6
   2 -12  -1 1558.66 374.862  35
   2 -12   0 4895.02 669.225   6
  -2  12   0 5072.06 505.458   1
   2 -12   0 4523.25 640.880  35
   2 -12   0 3676.55 303.820  14
   2 -12   0 3689.81 296.909  17
  -2  12  -1 948.008 277.593   1
   2 -12   1 345.409 143.634  11
   2 -12   1 388.042 300.351  35
   2 -12   1 312.211 122.553  17
   2 -12   1 211.902 245.302   6
   2 -12   1 476.627 164.943  14
   2 -12   2 711.809 388.484  35
   2 -12   2 129.942 143.822  14
   2 -12   2 12.3831 125.365  11
   2 -12   2 263.774 145.166  17
   2 -12   2 134.625 277.067   6
  -2  12  -2 326.645 215.300   1
   2 -12   3 139.370 129.837  11
  -2  12  -3 18.0291 165.906   1
   2 -12   3-379.210 311.670   6
   2 -12   3 353.639 346.213  35
   2 -12   3 143.502 145.040  14
   2 -12   4 279.030 151.830  14
  -2  12  -4 606.227 256.340   1
   2 -12   4 281.371 277.259  35
   2 -12   4 351.028 149.209  11
   2 -12   5-22.9113 148.501  11
   2 -12   5 16.7491 156.384  14
   2 -12   6-108.993 186.396  14
   2 -12   6 31.5836 126.640  16
   2 -12   7-29.0340 140.021  14
   2 -12   7-132.337 115.882  16
   2 -12   8 88.6222 159.005  14
   2 -12   9 118.428 172.602  14
   2 -12   9 103.169 139.624  15
   2 -12  10 746.937 211.759  14
   2 -12  10 876.189 158.639  15
   2 -12  11 947.661 206.806  14
   2 -12  11 1332.97 183.700  15
   2 -12  12 707.299 183.940  14
   2 -12  12 602.941 156.914  20
   2 -12  12 1013.34 168.966  15
   2 -12  13 154.851 124.910  20
[truncated: 2,313,197 more chars]
